# Supplementary material for: Amino acids profiling and transcriptomic data integration demonstrates the dynamic regulation of amino acids synthesis in the leaves of Cyclocarya paliurus
Source: PeerJ. 2022 Jul 5;10:e13689. doi: 10.7717/peerj.13689 (PMC9266588; doi:10.7717/peerj.13689)
Supplement: Supplemental Information 8 [file peerj-10-13689-s008.xls]

## Sheet: Sheet1
Table S2 Primers used in this study
Gene ID	Gene name and function	Forward primer (5'-3')	Reverse primer (5'-3')
TRINITY_DN81021_c4_g6	pgm; phosphoglucomutase	TTGCTGGAGCGGATGTTTAT	CAGAATTGATTGTGGGTTAT
TRINITY_DN93648_c0_g1	pfkA; 6-phosphofructokinase 1	CGAAGAGGTGAAAGCAGCAA	ACCAAAGGGAATACCGACAA
TRINITY_DN82092_c1_g3	fba; fructose-bisphosphate aldolase, class I	TAATGCTCGCCCAAATGAGA	GGACAAAGCGAAGAAGAGGC
TRINITY_DN96899_c2_g2	gapdh; glyceraldehyde-3-phosphate dehydrogenase (NADP+)	GGCTGGGACTGGACTGTTCT	TTTCGCGTAGTTGGGTTGAT
TRINITY_DN88919_c2_g3	pgk; phosphoglycerate kinase	TGGCAACCTCACCTCAAATA	TCCTGTTCCCGTGTAAGACA
TRINITY_DN87922_c2_g2	eno; enolase	CAATTCAGAGGGCTCGTTAG	AATGGCGAAACCACTACTCA
TRINITY_DN97785_c1_g4	acly: ATP citrate (Pro-S)-lyase	CCGAGGATCTTAACACTGCC	ACCAACACCATAACCCGACT
TRINITY_DN76877_c1_g1	scs; succinyl-CoA synthetase alpha subunit	TCACAGGAAAGCAGGGAACT	CCGAGACCGTAGCAAAGACA
TRINITY_DN83323_c1_g1	pgd; 6-phosphogluconate dehydrogenase	CTCGGTAGGCAGAGGTGATA	CAGAACGCTGCTAAGGAGTA
TRINITY_DN86203_c1_g1	rpiA; ribose 5-phosphate isomerase A	GAAGCAGCGAAGGCAGGAAT	TGGCGTCCAATGATAGCACC
TRINITY_DN81124_c1_g3	tal; transaldolase	GCCGCCATGAAGAAGGATTT	GCCAGCGAGTTCGGTGATTT
TRINITY_DN91569_c1_g4	glyA; glycine hydroxymethyltransferase	GTTGAGAAGGTGCTGGAATC	TAGAAGTAAGAGCCGGAGTT
TRINITY_DN93919_c0_g1	ltaE; threonine aldolase	AGGCAAACTGTGGAGGTAGA	CCAGCCTATGAACAGGAATG
TRINITY_DN97373_c0_g2	tat; tyrosine aminotransferase	GATTGAAGAGCGTCAACGAC	AGAAAGACAACAAGAGGGTG
TRINITY_DN93212_c0_g1	ast; aspartate aminotransferase, cytoplasmic	CACGCTAGAGGTACACCAGG	AATTCTCCCATCAGAAGTCA
TRINITY_DN87678_c2_g2	gs; glutamine synthetase	CAACAAACAAACGCCACAAG	GACCAGGATAGCCTCCAACA
β-Actin		CTCTTCCAGCCATCCATGATCG	CCACTGAGGACAATATTGCCAT
