# Supplementary material for: Amino acids profiling and transcriptomic data integration demonstrates the dynamic regulation of amino acids synthesis in the leaves of Cyclocarya paliurus
Source: PeerJ. 2022 Jul 5;10:e13689. doi: 10.7717/peerj.13689 (PMC9266588; doi:10.7717/peerj.13689)
Supplement: Supplemental Information 9 [file peerj-10-13689-s009.xls]

## Sheet: all metabolites
Table S3. Type and content of identified metabolites in the leaves of different development stages.
Index	Q1(Da)	Q3(Da)	Rt	Molecular Weight (Da)	Ionization model	KEGG ID	Compounds	Class	mix01	mix02	mix03	mix04	S3-1	S3-2	S3-3	S2-1	S2-2	S2-3	S1-1	S1-2	S1-3
pma0110	399	207.5	3.17	398	[M+H]+	-	O-Sinapoyl quinic acid	Quinate and its derivatives	131000	381000	303000	308000	118000	559000	216000	501000	397000	320000	213000	133000	92300
pma0134	121	77.1	1.16	120	[M+H]+	-	D(-)-Threose	Carbohydrates	10100000	17600000	17100000	15700000	3650000	211000	4770000	35900000	6580000	4120000	103000000	61800000	27700000
pma0149	341.1	179.4	2.28	340.1	[M+H]+	C02887	Sinapoyl malate	Organic acids	130000	186000	223000	214000	305000	531000	487000	45100	77100	134000	82600	177000	280000
pma0214	479	317.3	3.91	478	[M+H]+	-	methylQuercetin O-hexoside	Flavonol	1310000	1550000	1770000	1640000	400000	1280000	117000	4940000	638000	575000	8370000	587000	244000
pma0249	479.1	302.8	3.52	478.1	[M+H]+	-	Selgin 5-O-hexoside	Flavone	541000	626000	678000	516000	80200	743000	356000	627000	1160000	597000	1930000	624000	782000
pma0253	477.1	315.5	5.27	476.1	[M+H]+	-	O-methylChrysoeriol 5-O-hexoside	Flavone	2290000	2400000	2440000	2530000	1440000	24100000	5040000	722000	517000	9	728000	582000	541000
pma0461	277.2	157.4	8.52	276.2	[M+H]+	-	14,15-Dehydrocrepenynic acid	Lipids_Fatty acids	6110000	6710000	6910000	6410000	3740000	4360000	3670000	5540000	4270000	5380000	6030000	9300000	7940000
pma0633	349.3	147.1	2.68	348.3	[M+H]+	-	N-p-coumaroylspermine	Phenolamides	25200	33300	39600	30400	9	9	14700	66100	46900	48100	52700	25500	27500
pma0702	558.3	264.8	3.75	557.3	[M+H]+	-	N', N''-disinapoylspermidine	Phenolamides	2750000	3400000	2910000	3260000	7890000	11500000	5230000	786000	863000	1040000	3200000	722000	842000
pma0724	435.1	339.7	3.79	434.1	[M+H]+	-	Naringenin C-hexoside	Flavone C-glycosides	342000	474000	449000	478000	2040000	557000	958000	1020000	692000	312000	332000	209000	240000
pma0760	565	317.8	4.33	564	[M+H]+	-	Selgin O-malonylhexoside	Flavone	184000	353000	333000	384000	1110000	761000	326000	69300	405000	219000	266000	265000	302000
pma0791	521	317.6	4.5	520	[M+H]+	-	Naringenin O-malonylhexoside	Flavanone	115000	184000	149000	167000	50600	9	39000	94900	347000	354000	79500	87200	139000
pma0825	503	255.6	5.24	502	[M+H]+	-	Chrysin O-malonylhexoside	Flavone	33300	27500	43700	33700	18000	21300	9	25900	17300	23700	22900	19700	9770
pma0948	138.1	77.2	1.26	137.1	[M+H]+	-	Hydroxyphenethylamine	Others	16200000	25600000	25400000	26100000	5400000	221000	7440000	51000000	10500000	6170000	148000000	91300000	39000000
pma1108	433.1	271.7	3.78	432.1	[M+H]+	-	Apigenin C-glucoside	Flavone C-glycosides	5940000	7990000	8270000	7960000	31400000	9000000	22000000	21400000	18300000	8090000	2040000	760000	742000
pma1116	301.1	259.1	4.13	300.1	[M+H]+	C10098	Kaempferide	Flavonol	297000	482000	468000	410000	883000	988000	1550000	304000	561000	300000	250000	224000	242000
pma1590	463.1	301.4	2.89	463.123	Protonated	-	Peonidin O-hexoside	Anthocyanins	509000	1020000	815000	1020000	9	239000	248000	1520000	3680000	1520000	6720000	1730000	954000
pma1751	286	124.3	1.95	285	[M+H]+	-	Nicotinic acid-hexoside	Nicotinic acid derivatives	7000000	9770000	9480000	9510000	31600000	18900000	31900000	327000	1580000	3890000	1030000	1710000	1570000
pma2172	268	131.3	5.94	267	[M+H]+	-	Cinnamoyl tyramine	Tryptamine derivatives	14400	21800	18400	21000	9	9	9	22200	52600	26300	19500	17900	11400
pma2400	167.1	121.2	2.8	166.1	[M+H]+	-	Dihydrojasmone	Others	73400	190000	152000	168000	295000	629000	420000	9	52400	60200	66700	26600	30900
pma2681	206.1	132.4	2.05	205.1	[M+H]+	C02470	Xanthurenic acid	Organic acids	40000	75200	114000	142000	137000	155000	118000	120000	115000	142000	115000	9	227000
pma2987	142.1	82.9	0.62	141.1	[M+H]+	C00860	Histidinol	Others	5270000	6310000	6390000	6440000	6400000	7100000	7650000	6770000	6970000	6860000	6760000	6800000	6810000
pma3101	256.2	124	0.84	255.2	[M+H]+	C05841	Nicotinate ribonucleoside	Nicotinic acid derivatives	12700000	12200000	12900000	13700000	20600000	23000000	21400000	18100000	11900000	10900000	13600000	13700000	15800000
pma3606	295.2	179.5	9.22	294.2	[M+H]+	-	9-Hydroxy-(10E,12Z,15Z)-octadecatrienoic acid	Lipids_Fatty acids	891000	923000	1120000	953000	458000	588000	546000	708000	445000	684000	1180000	2080000	2090000
pma3649	132.1	86.2	1.01	131.1	[M+H]+	C00430	5-Aminolevulinate	Organic acids	3230000	5720000	4850000	6230000	2110000	2990000	3950000	9120000	6570000	4490000	7710000	9750000	10300000
pma3724	369.1	207.5	3.42	368.1	[M+H]+	-	1-O-Feruloyl quinic acid	Quinate and its derivatives	12200000	18600000	18500000	18400000	4350000	1790000	3220000	21500000	26000000	14500000	31400000	24300000	21400000
pma6199	417.2	255.8	4.99	416.2	[M+H]+	-	Chrysin O-hexoside	Flavone	598000	695000	736000	701000	1260000	431000	719000	356000	544000	267000	534000	210000	195000
pma6262	349.2	147	2.42	348.2	[M+H]+	-	N'-p-coumaroylspermine	Phenolamides	17400	37900	48000	40100	9	9	9	71600	55600	49200	52200	23200	22600
pma6270	258.2	125.2	0.78	258.2	Protonated	C00670	sn-Glycero-3-phosphocholine	Cholines	1370000	1120000	1220000	1530000	803000	997000	646000	2220000	2310000	1780000	1650000	1050000	427000
pma6281	145.1	74	0.75	146.1	[M-H]-	-	Methylglutaric acid	Organic acids	31500	46100	42000	46200	36100	47100	33700	35800	25600	38100	24900	43000	39000
pma6298	96	80.2	1.16	95	[M+H]+	-	3-Hydroxypyridine	Others	64800	138000	129000	110000	484000	463000	633000	90000	30900	32600	39800	32500	25100
pma6372	643.1	332	5.01	642.1	[M+H]+	-	Tricin O-vanilloylhexoside	Flavone	17100	22800	30400	24700	22000	37400	9	7420	16800	12400	18400	6670	11700
pma6373	671.1	356	4.06	670.1	[M+H]+	-	3',4',5'-Dihydrotricetin O-hexosyl-O-hexoside	Flavone	400000	572000	513000	753000	2250000	5890000	5050000	9	223000	209000	9	9	9
pma6389	345.2	177.5	6.33	344.2	[M+H]+	C04444	Ayanin	Flavonol	262000	424000	403000	408000	640000	577000	715000	395000	220000	286000	307000	177000	141000
pma6455	229	157.1	0.86	230	[M-H]-	C00117	Ribulose-5-phosphate	Carbohydrates	273000	238000	332000	242000	286000	327000	343000	478000	417000	298000	252000	234000	124000
pma6460	337	275.8	3.26	338	[M-H]-	-	5-O-p-Coumaroylquinic acid	Quinate and its derivatives	13400000	11500000	12200000	12100000	8840000	1630000	7890000	16900000	17300000	11800000	27800000	16700000	12600000
pma6496	449.1	300	3.45	448.1	[M+H]+	-	Luteolin 6-C-glucoside	Flavone C-glycosides	740000	1040000	1050000	990000	3150000	785000	3150000	1240000	1210000	595000	1390000	508000	453000
pma6516	757.3	450.1	3.55	756.3	[M+H]+	-	C-hexosyl-apigenin O-hexosyl-O-hexoside	Flavone C-glycosides	337000	349000	376000	352000	304000	241000	335000	383000	742000	305000	272000	303000	284000
pma6558	313.1	298.3	7.22	314.1	[M-H]-	-	Velutin	Flavone	423000	409000	417000	409000	46700	2880000	460000	7540	7970	8040	485000	173000	105000
pma6561	341	179.2	2.86	342	[M-H]-	-	Caffeic acid O-glucoside	Hydroxycinnamoyl derivatives	2710000	2720000	2820000	2470000	2720000	11800000	3680000	1530000	743000	1100000	1920000	1840000	1680000
pma6576	347	288	4.41	346	[M+H]+	-	Spinacetin	Flavone	28500	30900	38500	35200	19400	9340	12500	12900	87600	16700	57200	21000	24400
pma6599	207.1	147.4	3.31	206.1	[M+H]+	-	6-Hydroxymethylherniarin	Hydroxycinnamoyl derivatives	969000	2440000	2490000	2500000	2790000	11800000	6730000	2110000	1350000	2220000	856000	512000	548000
pma6625	405.1	242.2	4.63	406.1	[M-H]-	-	E-3,4,5'-Trihydroxy-3'-glucopyranosylstilbene	Others	57100	52900	54200	47500	101000	89900	59100	37100	30500	43800	30800	9	9
pma6638	477.2	328	5.3	476.2	[M+H]+	-	O-methylChrysoeriol 7-O-hexoside	Flavone	2240000	2590000	2710000	2600000	1550000	25100000	5360000	952000	632000	9	895000	770000	807000
pma6639	479.2	318	4.17	478.2	[M+H]+	-	Isorhamnetin O-hexoside	Flavonol	2130000	2940000	2740000	2750000	983000	627000	420000	1230000	2060000	436000	14500000	7960000	6150000
pmb0064	374.1	198.6	2.05	373.1	[M+H]+	C04831	DIMBOA glucoside	Others	29600	40500	45400	48000	22200	22900	52700	68700	16000	49300	156000	78200	56400
pmb0069	122	105.3	2.26	121	[M+H]+	C09815	Benzamide	Others	6000000	11600000	11100000	11900000	3040000	477000	10400000	32000000	5700000	3330000	58600000	27400000	9490000
pmb0108	375.2	137.6	3.47	374.2	[M+H]+	-	Feruloyl syringic acid	Hydroxycinnamoyl derivatives	229000	293000	289000	296000	770000	590000	498000	202000	163000	177000	124000	62700	55400
pmb0128	213.3	97.3	4.52	212.3	[M+H]+	-	delta-Tridecalactone	Lipids_Fatty acids	271000	373000	383000	368000	171000	116000	297000	138000	460000	334000	570000	385000	338000
pmb0142	165.1	95.5	6.04	164.1	[M+H]+	C10945	Caffeic aldehyde	Hydroxycinnamoyl derivatives	185000	276000	303000	305000	141000	250000	198000	151000	233000	329000	191000	170000	164000
pmb0149	351	259.8	6.73	350	[M+H]+	-	MAG (18:4) isomer1	Lipids_Glycerolipids	1650000	3240000	3350000	3350000	4700000	5290000	4220000	833000	1550000	3420000	646000	824000	489000
pmb0159	696.4	696.2	7.6	695.4	[M+H]+	-	DGMG (18:2) isomer2	Lipids_Glycerolipids	1860000	2730000	1870000	2090000	1570000	2220000	2450000	1250000	2540000	2820000	919000	1300000	1810000
pmb0160	353.3	261.8	7.6	352.3	[M+H]+	-	MAG (18:3) isomer5	Lipids_Glycerolipids	7420000	9470000	9960000	9770000	6390000	7640000	9850000	4990000	10400000	13700000	3780000	5350000	4910000
pmb0161	696.4	337.8	8.12	695.4	[M+H]+	-	DGMG (18:2) isomer1	Lipids_Glycerolipids	892000	909000	1120000	904000	1090000	1590000	1380000	501000	1370000	1640000	412000	348000	317000
pmb0163	696.4	696.3	8.11	695.4	[M+H]+	-	DGMG (18:2) isomer3	Lipids_Glycerolipids	875000	1080000	808000	990000	869000	1480000	1040000	540000	1330000	1450000	340000	258000	219000
pmb0164	355.1	263.8	8.46	354.1	[M+H]+	-	MAG (18:2) isomer1	Lipids_Glycerolipids	801000	805000	1110000	895000	1650000	1030000	1400000	2300000	1720000	1650000	927000	9	358000
pmb0165	494.3	476.6	8.55	493.3	[M+H]+	-	LysoPC 16:1	Lipids_Glycerophospholipids	361000	416000	403000	427000	125000	137000	144000	9	9	9	417000	2230000	2080000
pmb0168	700.1	184.4	9.33	699.1	[M+H]+	-	PC 16:1/14:1	Lipids_Glycerophospholipids	87600	110000	95800	86900	11400	31000	37400	79800	79200	38500	227000	508000	516000
pmb0197	298.1	166.5	1.16	297.1	[M+H]+	-	N2-methylguanosine	Nucleotide and its derivates	318000	337000	376000	365000	177000	140000	184000	708000	768000	375000	647000	1700000	1620000
pmb0235	323.1	145.1	2.44	322.1	[M+H]+	-	O-Feruloyl coumarin	Coumarins	224000	272000	278000	282000	448000	1030000	228000	9	47400	84700	60200	9	9
pmb0247	137.3	94.3	3.14	136.3	[M+H]+	C00568	p-Aminobenzoate	Benzoic acid derivatives	1020000	1030000	902000	1170000	1620000	1850000	1060000	811000	905000	820000	1210000	672000	582000
pmb0287	351.4	277.8	7.47	350.4	[M+H]+	-	MAG (18:4) isomer2	Lipids_Glycerolipids	15700	24000	21700	19900	17200	19900	34000	28500	51600	38500	25700	9	6790
pmb0292	387.1	331.8	7.65	386.1	[M+H]+	C00187	Cholesterol	Others	1210000	1640000	1710000	1720000	787000	862000	920000	4550000	1490000	2210000	3720000	2140000	1040000
pmb0296	357.2	339.9	8.97	356.2	[M+H]+	-	MAG (18:1) isomer2	Lipids_Glycerolipids	354000	464000	473000	424000	440000	510000	892000	259000	530000	662000	234000	298000	305000
pmb0302	126.1	97.3	3.69	125.1	[M+H]+	C03557	2-Aminoethylphosphonate	Others	124000	262000	268000	272000	280000	394000	283000	92300	118000	186000	71100	50500	41800
pmb0312	176.1	133.4	3.7	175.1	[M+H]+	-	5-methoxyindole-3-carbaldehyde	Indole derivatives	89800	200000	210000	259000	387000	316000	352000	73000	169000	215000	49400	12500	3900
pmb0374	136.1	119.3	1.82	135.1	[M+H]+	-	Aminopurine	Others	6090000	9220000	8860000	9430000	2240000	3650000	7970000	18200000	11500000	9410000	17900000	14200000	10100000
pmb0382	339.1	177.5	3.88	338.1	[M+H]+	-	O-Feruloyl 4-hydroxylcoumarin	Coumarins	644000	1400000	753000	827000	9	9	2920000	158000	90100	308000	2010000	413000	843000
pmb0423	195.1	177.5	3.22	194.1	[M+H]+	-	Hydroxy-methoxycinnamate	Hydroxycinnamoyl derivatives	1060000	2810000	2870000	2040000	2340000	3910000	2020000	3640000	2760000	2770000	8260000	3760000	2310000
pmb0426	219.1	189.5	3.84	218.1	[M+H]+	C08309	5-Methoxy-N,N-dimethyltryptamine	Tryptamine derivatives	116000	245000	243000	231000	972000	612000	748000	9	31200	79400	48800	16800	8490
pmb0449	162.1	98.3	0.8	161.1	[M+H]+	C00956	2-Aminoadipic acid (L-Homoglutamic acid)	Amino acids	458000	830000	873000	887000	915000	666000	1460000	918000	1440000	1570000	823000	543000	323000
pmb0464	458.1	116.4	0.81	457.1	[M+H]+	-	Aspartic acid di-O-glucoside	Amino acid derivatives	1740000	1820000	1810000	1840000	149000	44200	85300	1670000	265000	1660000	1020000	346000	280000
pmb0468	178	161.5	1.65	177	[M+H]+	C03145	N-formylmethionine	Amino acid derivatives	153000	487000	386000	366000	1130000	149000	749000	7090000	579000	690000	531000	270000	206000
pmb0484	104.1	60.2	0.76	103.1	[M+H]+	C00114	Choline	Cholines	2410000	4800000	4350000	4760000	3220000	2860000	4440000	7260000	7100000	5900000	5750000	3170000	2310000
pmb0490	235.1	147.5	2.29	234.1	[M+H]+	C18326	N-p-Coumaroyl putrescine	Phenolamides	99200	93800	106000	80200	221000	231000	157000	37900	9	9	24900	9	9
pmb0492	584.2	325.8	2.42	583.2	[M+H]+	-	N',N",N"'-p-coumaroyl-cinnamoyl-caffeoyl spermidine	Phenolamides	2070000	2760000	2790000	2710000	442000	175000	800000	4160000	1740000	923000	2150000	3130000	3930000
pmb0493	277.2	260.8	2.58	276.2	[M+H]+	-	N'-p-Coumaroyl agmatine	Phenolamides	68600	121000	149000	99700	518000	60700	315000	9	9	9	9	9	9
pmb0501	131.1	72.1	0.75	130.1	[M+H]+	C00179	Agmatine	Phenolamides	1300000	2010000	2030000	2280000	1340000	1190000	4000000	3490000	2310000	2290000	866000	9	9
pmb0503	439.1	147.4	2.11	438.1	[M+H]+	-	N-(4'-O-glycosyl)-p-coumaroyl agmatine	Phenolamides	91300	147000	105000	122000	286000	176000	204000	9	9	9	24000	42500	9
pmb0505	235.1	147.4	2.38	234.1	[M+H]+	-	N'-p-Coumaroyl putrescine	Phenolamides	302000	426000	345000	411000	913000	864000	593000	9	9	75500	48900	9	9
pmb0508	277.1	147.5	2.43	276.1	[M+H]+	C04498	N-p-Coumaroyl agmatine	Phenolamides	20700	53300	42400	67900	197000	39000	121000	9	9	9	9	9	9
pmb0514	348.1	136.4	0.85	347.1	[M+H]+	C01367	Adenosine 3'-monophosphate	Nucleotide and its derivates	4240000	5150000	6530000	6490000	9570000	5400000	11400000	3210000	6350000	5100000	9000000	8010000	4610000
pmb0530	664.2	524.1	1.16	663.2	[M+H]+	C00003	Nicotinic acid adenine dinucleotide	Nucleotide and its derivates	1140000	1410000	1380000	1290000	1320000	1360000	2160000	1820000	3910000	4550000	1080000	966000	979000
pmb0542	535.1	287.4	2.99	535.1	Protonated	-	Cyanidin 3-O-malonylhexoside	Anthocyanins	44500	59700	80100	83500	57600	9	39000	92200	106000	73100	145000	90900	144000
pmb0545	477.1	315.6	3.32	477.1	Protonated	-	Rosinidin O-hexoside	Anthocyanins	235000	376000	470000	197000	228000	173000	200000	870000	419000	297000	1580000	380000	388000
pmb0550	449.1	287.3	2.59	449.1	Protonated	C08604	Cyanidin 3-O-glucoside (Kuromanin)	Anthocyanins	20700000	26500000	25400000	25000000	4930000	563000	21800000	6590000	4980000	3350000	373000000	32700000	6990000
pmb0563	301.1	273.6	3.95	301.1	Protonated	C08726	Peonidin	Anthocyanins	459000	677000	874000	839000	147000	9	9	123000	2620000	2650000	211000	337000	462000
pmb0565	509.1	347.7	3.41	508.1	[M+H]+	-	Syringetin 3-O-hexoside	Flavonol	300000	332000	445000	394000	2340000	1590000	2170000	9	9	9	9	9	51900
pmb0569	509.2	347.6	4.17	508.2	[M+H]+	-	Syringetin 5-O-hexoside	Flavone	19800000	28300000	24500000	29200000	6430000	14400000	13600000	29400000	59400000	18200000	60500000	51700000	53100000
pmb0574	757.1	581.5	4.31	756.1	[M+H]+	-	Luteolin O-hexoside O-feruloylpentoside	Flavone	101000	86600	121000	97100	24200	70700	98600	127000	982000	82000	57100	9	9
pmb0578	655	287.7	4.67	654	[M+H]+	-	Luteolin O-sinapoylhexoside	Flavone	105000	122000	141000	126000	421000	24900	152000	9	13700	8220	3670	67600	142000
pmb0580	417.1	255.7	5	416.1	[M+H]+	-	Chrysin 5-O-glucoside (Toringin)	Flavone	509000	685000	651000	608000	1210000	358000	563000	479000	464000	251000	479000	178000	144000
pmb0587	639.1	640	3.29	638.1	[M+H]+	-	Chrysoeriol O-glucuronic acid-O-hexoside	Flavone	305000	529000	417000	556000	245000	365000	329000	202000	242000	215000	331000	367000	304000
pmb0595	479.2	317.8	4.17	478.2	[M+H]+	-	Isorhamnetin 5-O-hexoside	Flavonol	2060000	2620000	2680000	2750000	837000	593000	513000	1230000	1810000	547000	13800000	8350000	6360000
pmb0600	609.4	301.7	4.08	608.4	[M+H]+	-	Chrysoeriol 7-O-rutinoside	Flavone	41400	57600	70000	85900	9	106000	52000	377000	117000	72300	52500	14300	16400
pmb0602	509.3	283.6	4.17	508.3	[M+H]+	-	Syringetin 7-O-hexoside	Flavone	20300000	28800000	26300000	22500000	6690000	14700000	13800000	31900000	56100000	18300000	60700000	57800000	51800000
pmb0604	449.1	287.6	3.93	448.1	[M+H]+	C12249	Kaempferol 3-O-glucoside (Astragalin)	Flavonol	7980000	9090000	9520000	10000000	1740000	2070000	2930000	5140000	11400000	8950000	13400000	8740000	11400000
pmb0605	433.1	271.7	4.21	432.1	[M+H]+	C04608	Apigenin 7-O-glucoside (Cosmosiin)	Flavone	915000	1230000	1380000	1290000	2260000	1660000	1150000	1340000	1230000	598000	848000	797000	1050000
pmb0606	477.1	287	4.19	476.1	[M+H]+	-	Chrysoeriol O-glucuronic acid	Flavone	149000	182000	183000	196000	107000	9	156000	86400	186000	126000	660000	95300	172000
pmb0618	627.1	430	2.78	626.1	[M+H]+	-	8-C-hexosyl-hesperetin O-hexoside	Flavone C-glycosides	1170000	1610000	1690000	1710000	80700	100000	340000	464000	1100000	812000	2110000	7220000	15600000
pmb0621	641.1	623	3.09	640.1	[M+H]+	-	C-hexosyl-isorhamnetin O-hexoside	Flavone C-glycosides	363000	121000	403000	498000	9	9	9	527000	1070000	325000	2650000	1380000	826000
pmb0628	613.1	300.3	3.09	612.1	[M+H]+	-	Eriodictiol C-hexosyl-O-hexoside	Flavone C-glycosides	203000	302000	355000	306000	9	9	9	9	60200	9	9	1100000	2230000
pmb0644	449.1	329.6	3.45	448.1	[M+H]+	-	Luteolin C-hexoside	Flavone C-glycosides	859000	1060000	1080000	1050000	3750000	999000	3200000	1420000	1560000	646000	1450000	539000	324000
pmb0645	627.1	447.3	3.41	626.1	[M+H]+	-	6-C-hexosyl-hesperetin O-hexoside	Flavone C-glycosides	756000	770000	950000	1080000	835000	407000	316000	852000	1090000	603000	1800000	9	1200000
pmb0652	565.1	397.8	3.6	564.1	[M+H]+	-	C-hexosyl-apigenin O-pentoside	Flavone C-glycosides	56400	75200	83000	89100	113000	9	300000	500000	316000	107000	9	9	9
pmb0663	611.1	299.8	3.75	610.1	[M+H]+	-	8-C-hexosyl-luteolin O-hexoside	Flavone C-glycosides	222000	291000	253000	267000	9	208000	9	844000	111000	75500	994000	413000	306000
pmb0665	611.2	299.8	3.78	610.2	[M+H]+	-	Luteolin 8-C-hexosyl-O-hexoside	Flavone C-glycosides	851000	1100000	844000	1070000	286000	514000	255000	1310000	639000	382000	4190000	583000	152000
pmb0672	771.1	367.9	4.02	770.1	[M+H]+	-	6-C-hexosyl-apigenin O-feruloylhexoside	Flavone C-glycosides	56300	63200	53800	59500	9	9	43200	9	9	9	26600	32100	9
pmb0686	537	289.7	4.41	536	[M+H]+	-	Eriodictyol O-malonylhexoside	Flavanone	954000	1240000	1170000	1170000	6810000	259000	233000	55400	514000	309000	790000	2640000	3350000
pmb0689	463.1	301.8	4.75	462.1	[M+H]+	-	Chrysoeriol C-hexoside	Flavone C-glycosides	84200	109000	83500	88000	97500	212000	227000	9	39200	9	65900	19500	22000
pmb0696	625	397.8	3.46	624	[M+H]+	-	8-C-hexosyl chrysoeriol O-hexoside	Flavone C-glycosides	47000	104000	148000	170000	102000	138000	9	84600	152000	62400	289000	121000	63900
pmb0701	463.1	367.8	3.89	462.1	[M+H]+	-	Chrysoeriol 8-C-hexoside	Flavone C-glycosides	127000	190000	181000	170000	806000	192000	1030000	133000	75800	59200	33500	36200	37000
pmb0706	713.1	713.1	2.96	712.1	[M+H]+	-	Quercetin 5-O-malonylhexosyl-hexoside	Flavonol	211000	222000	242000	242000	228000	107000	135000	125000	243000	152000	685000	1310000	1680000
pmb0709	713.1	303.6	3.49	712.1	[M+H]+	-	Quercetin 7-O-malonylhexosyl-hexoside	Flavonol	88600	113000	179000	152000	81900	30500	9	38600	102000	39700	109000	148000	211000
pmb0711	611.2	303.7	3.7	610.2	[M+H]+	-	Quercetin 7-O-rutinoside	Flavonol	696000	760000	933000	1170000	125000	314000	164000	1410000	506000	271000	3830000	704000	197000
pmb0723	689.2	329.8	4.97	688.2	[M+H]+	-	Tricin 4'-O-(β-guaiacylglyceryl) ether O-hexoside	Flavonolignan	620000	1030000	802000	829000	449000	543000	518000	986000	2020000	972000	2040000	1220000	1160000
pmb0724	477.1	331.8	4.99	476.1	[M+H]+	-	Tricin O-rhamnoside	Flavone	1550000	2030000	2000000	2160000	2830000	3620000	5660000	3790000	4540000	2080000	604000	457000	489000
pmb0725	669.1	669	5.1	668.1	[M+H]+	-	Tricin 7-O-feruloylhexoside	Flavone	74800	88400	70500	67300	270000	393000	215000	9	9	17900	9	9	9
pmb0727	405.1	331.7	5.23	404.1	[M+H]+	-	Tricin O-glycerol	Flavone	22100	23000	25700	26200	9	9	14500	52400	52100	49200	43000	37500	29200
pmb0738	699.2	331.6	4.88	698.2	[M+H]+	-	Tricin O-sinapoylhexoside	Flavone	72200	84900	86100	106000	60700	680000	258000	11700	4950	9	9	6060	10700
pmb0743	527.1	331.7	5.44	526.1	[M+H]+	-	Tricin 7-O-β-guaiacylglycerol	Flavonolignan	7710	13000	8940	11600	8800	13500	13800	13400	54300	17400	9	5670	9
pmb0745	497.1	331.8	5.75	496.1	[M+H]+	-	Tricin 4'-O-syringyl alcohol	Flavonolignan	7460	7830	12700	15900	12700	18900	11300	11300	10700	5780	16600	10600	23200
pmb0746	527.1	331.7	5.84	526.1	[M+H]+	-	Tricin 4'-O-β-guaiacylglycerol	Flavonolignan	476000	545000	551000	545000	352000	2910000	620000	477000	474000	257000	136000	126000	152000
pmb0749	369.1	177.5	2.12	368.1	[M+H]+	-	O-Feruloyl quinic acid	Quinate and its derivatives	625000	1180000	1230000	1250000	481000	1480000	1100000	1670000	1550000	1080000	1830000	1190000	1070000
pmb0751	321.1	147.5	3.81	320.1	[M+H]+	-	5-O-p-Coumaroyl shikimic acid	Quinate and its derivatives	261000	595000	608000	612000	916000	208000	654000	343000	173000	183000	627000	428000	388000
pmb0752	369.1	177.5	3.01	368.1	[M+H]+	C02572	3-O-Feruloyl quinic acid	Quinate and its derivatives	11900000	24000000	20600000	19000000	4760000	8860000	14700000	25400000	18400000	11700000	49200000	24900000	24200000
pmb0764	144.1	142.9	2.6	143.1	[M+H]+	C04294	4-Methyl-5-thiazoleethanol	Others	79700	137000	143000	152000	77900	129000	85600	202000	169000	148000	174000	247000	249000
pmb0766	390.4	284.9	7.2	389.4	[M+H]+	-	Azoxystrobin acid	Others	2170000	2780000	2710000	2740000	1500000	1640000	1770000	8450000	3240000	2620000	4680000	3420000	2360000
pmb0767	302.4	284.9	7.25	301.4	[M+H]+	-	D-erythro-Dihydrosphingosine	Others	112000	126000	121000	121000	50200	140000	181000	253000	1570000	339000	421000	525000	491000
pmb0769	485.1	147.5	3.79	484.1	[M+H]+	-	N-hexosyl-p-coumaroyl serotonin	Tryptamine derivatives	411000	449000	504000	348000	294000	418000	238000	191000	318000	286000	482000	190000	139000
pmb0770	353.1	177.5	4.79	352.1	[M+H]+	-	N-Feruloyl serotonin	Tryptamine derivatives	596000	1130000	1150000	1140000	1600000	1450000	997000	2440000	1180000	1260000	563000	123000	82800
pmb0772	307.1	131.4	5.94	306.1	[M+H]+	-	N-Cinnamoyl serotonin	Tryptamine derivatives	9080	17800	25400	14300	13900	9	22800	7180	24400	20100	15100	9270	10600
pmb0774	177.2	160.5	1.63	176.2	[M+H]+	C17203	N-hydroxy tryptamine	Tryptamine derivatives	8060000	19000000	14500000	16200000	55200000	6650000	33200000	292000000	25500000	31600000	22200000	10300000	8010000
pmb0782	86.1	56	1.19	85.1	[M+H]+	C01746	Piperidine	Alkaloids	2460000	3440000	3160000	3290000	1530000	1360000	1910000	4850000	3650000	3810000	2980000	4080000	5530000
pmb0786	180	84.2	0.69	179	[M+H]+	C00329	Glucosamine	Carbohydrates	7320000	9950000	9110000	9860000	10000000	12100000	14800000	14500000	17200000	13100000	13700000	11200000	9570000
pmb0789	332.1	314.7	1.16	331.1	[M+H]+	-	Pyridoxine O-glucoside	Vitamins	4430000	5330000	5070000	4720000	3110000	2820000	3540000	5810000	3980000	8350000	3760000	1740000	3410000
pmb0790	494.1	332.8	1.62	493.1	[M+H]+	-	Pyridoxine di-O-hexoside	Vitamins	479000	510000	531000	546000	673000	84400	767000	637000	753000	892000	626000	535000	623000
pmb0800	123.1	80.3	1.52	122.1	[M+H]+	C00153	Niacinamide	Vitamins	7760000	11300000	11500000	11800000	1610000	2650000	3110000	17400000	10100000	8980000	14700000	20300000	16500000
pmb0802	220.2	202.7	2.15	219.2	[M+H]+	C00864	D-Pantothenic acid	Vitamins	8550000	14100000	13500000	13600000	6180000	1570000	8060000	18100000	18800000	15300000	16800000	21400000	22700000
pmb0803	508.1	152.5	3.22	507.1	[M+H]+	-	Pyridoxine O-feruloyl hexoside	Vitamins	57100	74600	73000	75800	161000	293000	262000	9	9	9	24800	9	9
pmb0808	353.1	272.8	2.83	352.1	[M+H]+	-	6,7-dihydroxycoumarin 6-O-quinic acid	Coumarins	9510000	10700000	10300000	11300000	9170000	8960000	11200000	13100000	14200000	14800000	14900000	8130000	6460000
pmb0812	127.1	81.2	2.85	126.1	[M+H]+	C02835	Imidazole-4-acetate	Indole derivatives	173000	241000	345000	278000	386000	361000	224000	9	9	270000	9	9	123000
pmb0818	206.1	147.5	2.39	205.1	[M+H]+	C05660	Methoxyindoleacetic acid	Indole derivatives	11400000	22800000	21500000	22400000	779000	564000	1500000	39000000	21200000	8250000	69000000	41300000	30700000
pmb0829	98.9	81.1	0.88	97.9	[M+H]+	C00009	Phosphoric acid	Organic acids	16700000	22500000	21500000	16800000	19900000	36200000	19200000	34600000	33000000	32000000	33200000	20900000	13600000
pmb0837	577.1	425.4	2.92	576.1	[M+H]+	-	Procyanidin A3	Proanthocyanidins	12000000	12800000	13300000	13200000	20400000	7140000	22400000	2590000	884000	1490000	7390000	847000	434000
pmb0848	494.3	184.6	7.88	493.3	[M+H]+	-	LysoPC 16:1 (2n isomer)	Lipids_Glycerophospholipids	11800000	13300000	13400000	13200000	1320000	1430000	3510000	3960000	4430000	5510000	12300000	60400000	51300000
pmb0852	520.3	502.3	8.43	519.3	[M+H]+	-	LysoPC 18:2	Lipids_Glycerophospholipids	5730000	6220000	6610000	6650000	1810000	2200000	2920000	3760000	6530000	5570000	8810000	25900000	27900000
pmb0854	518.3	459.6	8.79	517.3	[M+H]+	-	LysoPC 18:3	Lipids_Glycerophospholipids	20400000	18900000	17000000	14200000	8510000	13100000	15100000	11700000	17400000	11400000	41000000	70400000	64000000
pmb0855	496.3	478.3	8.8	495.3	[M+H]+	-	LysoPC 16:0	Lipids_Glycerophospholipids	26600000	30500000	28200000	27900000	14000000	25900000	38900000	25200000	45000000	24100000	84600000	115000000	107000000
pmb0856	480.5	339.9	8.86	479.5	[M+H]+	-	LysoPE 18:1 (2n isomer)	Lipids_Glycerophospholipids	6950000	6580000	6050000	6140000	1090000	3510000	4820000	1210000	7210000	5690000	3700000	44900000	47400000
pmb0859	522.4	184.5	8.91	521.4	[M+H]+	-	LysoPC 18:1 (2n isomer)	Lipids_Glycerophospholipids	1530000	1960000	1860000	1760000	95200	282000	447000	211000	1130000	1600000	523000	8790000	8310000
pmb0863	492.3	184.5	7.34	491.3	[M+H]+	-	LysoPC 16:2 (2n isomer)	Lipids_Glycerophospholipids	3090000	3570000	3360000	3440000	159000	151000	385000	1160000	1210000	1460000	5380000	19000000	14300000
pmb0864	426.3	285.8	7.69	425.3	[M+H]+	-	LysoPE 14:0	Lipids_Glycerophospholipids	163000	182000	179000	189000	51400	36400	105000	173000	339000	88200	491000	693000	684000
pmb0865	518.2	500.3	7.71	517.2	[M+H]+	-	LysoPC 18:3 (2n isomer)	Lipids_Glycerophospholipids	2010000	2860000	2840000	2850000	229000	308000	827000	531000	1280000	2030000	1540000	7850000	7040000
pmb0866	468.1	450.5	7.74	467.1	[M+H]+	-	LysoPC 14:0	Lipids_Glycerophospholipids	545000	708000	708000	687000	216000	146000	220000	832000	606000	328000	1880000	1670000	1520000
pmb0873	520	125	8.25	519	[M+H]+	-	LysoPC 18:2 (2n isomer)	Lipids_Glycerophospholipids	2840000	3410000	3460000	3330000	239000	354000	642000	783000	1920000	3230000	1900000	14600000	13500000
pmb0874	478.6	337.9	8.38	477.6	[M+H]+	-	LysoPE 18:2 (2n isomer)	Lipids_Glycerophospholipids	5880000	6440000	6080000	5740000	1220000	1910000	2950000	2600000	8530000	2740000	9720000	38600000	44400000
pmb0876	454.2	314	8.74	453.2	[M+H]+	-	LysoPE 16:0	Lipids_Glycerophospholipids	10600000	11000000	11700000	11900000	3880000	10800000	20100000	6800000	45800000	15400000	40000000	142000000	140000000
pmb0877	480.1	339.9	8.87	479.1	[M+H]+	-	LysoPE 18:1	Lipids_Glycerophospholipids	292000	321000	301000	287000	43500	152000	223000	57000	338000	271000	166000	2100000	2200000
pmb0880	482.1	314	8.98	481.1	[M+H]+	-	LysoPE 18:0 (2n isomer)	Lipids_Glycerophospholipids	6340	7050	8670	8760	9	9	5440	4190	10800	5900	13300	75600	86500
pmb0882	522.1	125.5	9.07	521.1	[M+H]+	-	LysoPC 18:1	Lipids_Glycerophospholipids	7370000	8600000	8560000	8770000	773000	1960000	3020000	2990000	8160000	7910000	7510000	50100000	60600000
pmb0883	482.1	341.9	9.86	481.1	[M+H]+	-	LysoPE 18:0	Lipids_Glycerophospholipids	24100	20100	28400	30400	15200	61200	123000	17300	185000	54600	90000	580000	788000
pmb0885	291	273.9	6.71	290	[M+H]+	-	4-oxo-9Z,11Z,13E,15E-octadecatetraenoic acid	Lipids_Fatty acids	288000	463000	449000	485000	227000	747000	352000	182000	338000	541000	158000	349000	431000
pmb0889	279.3	201.5	8.96	278.3	[M+H]+	C08364	Punicic acid	Lipids_Fatty acids	1960000	2100000	2130000	1980000	1240000	1750000	1340000	2560000	1350000	1750000	3680000	3960000	3640000
pmb0890	355.1	337.9	10.52	354.1	[M+H]+	-	MAG (18:2)	Lipids_Glycerolipids	579000	702000	771000	766000	395000	324000	443000	603000	576000	754000	919000	1330000	1050000
pmb0896	265.1	177.5	2.33	264.1	[M+H]+	-	N'-Feruloyl putrescine	Phenolamides	51100	115000	142000	77400	176000	140000	529000	9	24900	9	116000	51900	81600
pmb0907	265.1	177.5	2.29	264.1	[M+H]+	C10497	N-Feruloyl putrescine	Phenolamides	85800	156000	184000	164000	214000	260000	822000	9	9	9	181000	92800	107000
pmb0962	235.1	118.4	0.8	234.1	[M+H]+	-	Lysine butyrate	Amino acid derivatives	27100	27300	31900	31100	65000	102000	107000	129000	73300	61600	41300	8580	5440
pmb0964	366.2	203.5	0.8	365.2	[M+H]+	-	iP7G	Nucleotide and its derivates	568000	553000	855000	671000	2320000	1250000	997000	717000	623000	626000	544000	114000	76700
pmb0981	348.2	136.4	1.16	347.2	[M+H]+	C00020	Adenosine 5'-monophosphate	Nucleotide and its derivates	4550000	5990000	4980000	4930000	7720000	4030000	11900000	1550000	6770000	7010000	5220000	6130000	7320000
pmb0998	364.1	152.5	1.01	363.1	[M+H]+	C00144	Guanosine 5'-monophosphate	Nucleotide and its derivates	585000	682000	626000	602000	148000	136000	237000	106000	326000	303000	388000	3000000	7670000
pmb1096	118	58.2	2.39	117	[M+H]+	C00463	Indole	Indole derivatives	14800000	28300000	28100000	29900000	1210000	868000	2030000	49800000	25300000	9250000	83900000	51100000	38600000
pmb1178	339.1	177.5	3.32	338.1	[M+H]+	-	O-Feruloyl 2-hydroxylcoumarin	Coumarins	1050000	2070000	2140000	2190000	4530000	5570000	6080000	246000	244000	380000	395000	234000	250000
pmb1207	339.1	177.5	3.34	338.1	[M+H]+	-	O-Feruloyl 3-hydroxylcoumarin	Coumarins	42400	61600	82900	58900	9	57600	93700	77500	158000	42500	9	9	9
pmb1240	503.2	311.8	3.79	502.2	[M+H]+	-	Phellodensin F	Others	4280000	5310000	5490000	5420000	10500000	13900000	4760000	1470000	2190000	1780000	1120000	712000	535000
pmb1283	448.1	215.7	4.16	447.1	[M+H]+	-	L-Glutaminyl-L-valyl-L-valyl-L-cysteine	Amino acid derivatives	65400	60600	65300	67500	114000	67500	122000	9740	81600	136000	13900	54500	57000
pmb1312	689.2	688.9	4.43	688.2	[M+H]+	-	Tricin 4'-O-(β-guaiacylglyceryl) ether 7-O-hexoside	Flavonolignan	77600	93100	102000	87900	172000	280000	135000	29300	47400	43300	17200	17300	12900
pmb1318	457.2	191.5	4.48	456.2	[M+H]+	-	8-Methyl-2-oxo-4-phenyl-2H-chromen-7-yl 4-(hexyloxy)benzoate	Benzoic acid derivatives	4100000	5730000	5730000	7570000	12700000	22600000	5210000	1080000	3340000	4120000	734000	730000	789000
pmb1452	275.1	258.1	6.23	274.1	[M+H]+	-	N-Lauryldiethanolamine	Others	329000	443000	522000	473000	222000	293000	308000	4670000	425000	592000	1090000	622000	293000
pmb1466	511.2	331.8	6.38	510.2	[M+H]+	-	Tricin 4'-O-syringic acid	Flavonolignan	40500	50500	52900	53500	35000	210000	82500	9840	37500	23700	62500	63100	81400
pmb1530	317.1	299.9	7.34	316.1	[M+H]+	-	Phytocassane D	Terpenoids	367000	507000	504000	523000	318000	1080000	514000	106000	443000	705000	76600	299000	455000
pmb1562	351	259.9	7.8	350	[M+H]+	-	MAG (18:4) isomer3	Lipids_Glycerolipids	94300	142000	161000	149000	66500	26800	40300	240000	126000	140000	115000	107000	67100
pmb1574	277.2	137.5	8.21	276.2	[M+H]+	-	Octadecadien-6-ynoic acid	Lipids_Fatty acids	1740000	1900000	1940000	1900000	396000	513000	404000	3110000	2250000	1930000	1780000	3140000	3350000
pmb1605	353.3	335.8	8.45	352.3	[M+H]+	-	MAG (18:3) isomer3	Lipids_Glycerolipids	13300000	16600000	17400000	16300000	12200000	16200000	11900000	3710000	13300000	24300000	5790000	13800000	13500000
pmb1626	534.4	262.9	9.22	533.4	[M+H]+	-	MGMG (18:2) isomer1	Lipids_Glycerolipids	19100	23700	24600	19200	7850	32200	24100	10900	41900	27500	6950	39200	33200
pmb1650	279.2	149.4	9.71	278.2	[M+H]+	-	Octadeca-11E,13E,15Z-trienoic acid	Lipids_Fatty acids	21500000	18800000	16600000	12800000	14700000	15000000	10000000	32500000	14400000	19200000	25600000	25100000	27200000
pmb1652	149	121.3	9.71	148	[M+H]+	-	Phthalic anhydride	Others	491000	590000	374000	407000	434000	405000	327000	1020000	435000	544000	656000	686000	752000
pmb1656	353.1	173.7	9.9	352.1	[M+H]+	-	MAG (18:3) isomer4	Lipids_Glycerolipids	74300	103000	119000	121000	256000	69800	141000	97600	96600	104000	91600	138000	129000
pmb1754	184	83.2	0.78	183	[M+H]+	C00588	O-Phosphocholine	Cholines	763000	1380000	1800000	1710000	1630000	5010000	1520000	790000	1180000	1040000	1630000	871000	667000
pmb1912	474.2	327.8	2.3	473.2	[M+H]+	C00234	10-Formyl-THF	Others	18600000	19000000	18700000	19100000	5040000	2480000	9460000	25100000	32600000	36200000	33700000	27100000	30500000
pmb2211	343.1	240.9	6.59	342.1	[M+H]+	-	Cocamidopropyl betaine	Others	854000	1500000	1510000	1430000	1040000	962000	960000	1460000	1090000	1200000	1480000	887000	895000
pmb2221	318.3	300.9	6.95	317.3	[M+H]+	C12144	4-Hydroxysphinganine	Lipids_Fatty acids	2290000	3050000	3100000	2880000	1960000	6870000	3680000	3600000	15000000	4080000	8300000	7650000	6650000
pmb2222	319.1	301.9	7.07	318.1	[M+H]+	-	Phytocassane C	Terpenoids	72100	117000	134000	132000	65800	232000	143000	145000	579000	152000	307000	259000	205000
pmb2228	538.1	184.5	6.84	537.1	[M+H]+	-	LysoPC 19:0	Lipids_Glycerophospholipids	53600	93500	88700	90800	37600	97800	41000	90100	55000	85600	205000	200000	134000
pmb2251	694.1	335.8	7.6	693.1	[M+H]+	-	DGMG (18:1)	Lipids_Glycerolipids	7550000	13200000	12300000	9910000	8000000	9840000	10800000	5600000	12600000	14900000	4570000	6040000	6890000
pmb2260	480.1	184.5	7.76	479.1	[M+H]+	-	LysoPC 15:1	Lipids_Glycerophospholipids	65100	77400	72600	75600	79900	54500	99300	33000	42500	25700	114000	97400	134000
pmb2319	482.3	184.5	8.26	481.3	[M+H]+	-	LysoPC 15:0	Lipids_Glycerophospholipids	889000	992000	947000	948000	876000	1020000	1130000	642000	1090000	623000	1860000	2240000	2310000
pmb2325	353.1	261.8	8.42	352.1	[M+H]+	-	MAG (18:3) isomer2	Lipids_Glycerolipids	1850000	2350000	2450000	2340000	1680000	2080000	1680000	536000	1950000	3400000	776000	1820000	1680000
pmb2363	357.2	339.9	8.76	356.2	[M+H]+	-	MAG (18:1) isomer1	Lipids_Glycerolipids	339000	431000	455000	421000	427000	528000	776000	205000	588000	722000	208000	276000	270000
pmb2383	534.1	338	9.04	533.1	[M+H]+	-	MGMG (18:2) isomer2	Lipids_Glycerolipids	49300	35800	40900	81200	63800	150000	48700	24700	60400	72900	18600	19300	29300
pmb2388	524.1	507.4	8.91	523.1	[M+H]+	-	LysoPC 18:0 (2n isomer)	Lipids_Glycerophospholipids	5330000	6000000	6140000	6060000	338000	1010000	1450000	761000	3740000	5840000	1650000	31100000	33000000
pmb2406	510.1	510.4	9.34	509.1	[M+H]+	-	LysoPC 17:0	Lipids_Glycerophospholipids	394000	474000	484000	465000	477000	1730000	2440000	337000	869000	520000	1250000	2270000	2200000
pmb2444	353.2	261.8	10.06	352.2	[M+H]+	-	MAG (18:3) isomer1	Lipids_Glycerolipids	17100000	18900000	22300000	21700000	16700000	12700000	22900000	19300000	18200000	20800000	16700000	21500000	23400000
pmb2467	279.2	201.5	10.62	278.2	[M+H]+	C06427	α-Linolenic acid	Lipids_Fatty acids	4300000	4740000	5140000	5280000	2900000	3370000	4530000	3360000	5030000	5530000	3740000	7200000	6290000
pmb2497	197	135.1	0.71	198	[M-H]-	C05584	4-Hydroxy-3-methoxymandelate	Organic acids	21900	25800	22700	18000	16300	9810	11300	22900	77000	41700	9	20600	19300
pmb2507	213.1	78.9	0.92	214.1	[M-H]-	C00672	2-Deoxyribose 1-phosphate	Carbohydrates	1040000	1030000	1450000	1040000	638000	1660000	880000	1130000	947000	2690000	548000	300000	117000
pmb2554	529.1	355.9	2.16	530.1	[M-H]-	-	5-O-Feruloyl quinic acid glucoside	Quinate and its derivatives	45600	55200	41700	41900	51700	48800	77900	93400	65600	58200	60800	37400	34800
pmb2586	593.1	549.4	3.72	594.1	[M-H]-	-	Gallocatechin-catechin	Catechin derivatives	7100	6500	3350	4390	9	9	9	22200	6250	5030	10700	4600	9
pmb2591	245	203.2	3.87	246	[M-H]-	C03137	Acetyl tryptophan	Amino acid derivatives	430000	383000	386000	420000	352000	236000	517000	514000	221000	394000	651000	419000	376000
pmb2601	307.1	161.2	4.38	308.1	[M-H]-	-	7-hydroxycoumarin-beta-rhamnoside	Coumarins	1300000	1190000	1230000	1160000	1160000	451000	902000	565000	2060000	1760000	1040000	792000	614000
pmb2620	207.1	192.1	5.52	208.1	[M-H]-	-	3,4-Dimethoxycinnamic acid	Hydroxycinnamoyl derivatives	9170	9620	9670	9820	7310	2420	3760	4610	9740	9930	13900	8710	8240
pmb2640	199	181.3	9.66	200	[M-H]-	C02679	Lauric acid (C12:0)	Lipids_Fatty acids	8170	7590	6830	6780	3970	4670	4360	10400	3910	4000	8430	7280	6450
pmb2643	225	207.2	10.05	226	[M-H]-	C08322	Myristoleic acid (C14:1)	Lipids_Fatty acids	10300	9410	8900	8920	5130	10500	7060	8710	6920	12800	6100	9790	16500
pmb2648	263.1	147.2	0.74	264.1	[M-H]-	C00378	Thiamine	Vitamins	8050	14400	19100	9740	18600	47600	21300	6740	9780	16100	3860	4260	6730
pmb2653	649.1	503.3	0.76	650.1	[M-H]-	-	D(+)-Melezitose O-rhamnoside	Carbohydrates	25800	30700	30400	21900	14100	19000	23900	28500	25100	27300	111000	65200	68300
pmb2654	460.1	118.2	0.78	461.1	[M-H]-	-	Anthranilate O-hexosyl-O-hexoside	Benzoic acid derivatives	532000	823000	640000	640000	235000	575000	439000	1460000	1670000	554000	1380000	1480000	1480000
pmb2657	289.1	191.2	0.71	290.1	[M-H]-	C03406	Argininosuccinate	Organic acids	539000	682000	664000	746000	173000	235000	425000	476000	1320000	1540000	480000	671000	658000
pmb2673	210.1	135.2	1.5	211.1	[M-H]-	-	3-(6-Hydroxy-3,4-dioxo-1,5-cyclohexadien-1-yl)-L-alanine	Amino acid derivatives	9620	7490	7710	10400	9	3730	2610	9530	6400	2810	8250	12700	14900
pmb2684	328.1	134.2	1.68	329.1	[M-H]-	C00575	Cyclic AMP	Nucleotide and its derivates	8090000	9240000	9380000	9190000	84500	101000	294000	8570000	5790000	2970000	12700000	25400000	33600000
pmb2723	485.1	323.3	3.44	486.1	[M-H]-	-	4-hydroxycoumarin di-glucoside	Coumarins	357000	345000	352000	332000	223000	151000	312000	515000	563000	465000	317000	133000	115000
pmb2778	295	183.3	8.96	296	[M-H]-	-	9,10-EODE	Lipids_Fatty acids	767000	741000	736000	738000	402000	524000	516000	1140000	533000	608000	1650000	1510000	1470000
pmb2784	293.2	275.6	10.21	294.2	[M-H]-	-	13-HOTrE	Lipids_Fatty acids	42700	38200	41500	45000	120000	152000	91600	11400	8910	19500	15400	14500	10000
pmb2786	293	275.4	8.42	294	[M-H]-	-	9-HOTrE	Lipids_Fatty acids	207000	220000	228000	228000	44300	58800	56500	351000	258000	221000	234000	428000	470000
pmb2787	293.2	249.9	9.19	294.2	[M-H]-	-	9-KODE	Lipids_Fatty acids	15100	13500	13600	12600	6020	7270	8100	5990	8370	9210	9540	34500	40700
pmb2789	309	291.5	7.54	310	[M-H]-	-	13-HpOTrE(r)	Lipids_Fatty acids	114000	94600	104000	103000	51900	41200	37300	141000	81900	77000	95200	223000	217000
pmb2791	309.1	291.4	7.55	310.1	[M-H]-	-	9-HpOTrE	Lipids_Fatty acids	117000	102000	101000	103000	49600	43100	37300	128000	81600	79500	94100	232000	234000
pmb2792	293	193.2	7.81	294	[M-H]-	-	13-HOTrE(r)	Lipids_Fatty acids	46400	46300	46100	46200	55500	40100	29600	202000	36500	41400	106000	49400	42000
pmb2795	177	145.2	5.5	178	[M-H]-	-	4-Methoxycinnamic acid	Hydroxycinnamoyl derivatives	1410000	1320000	1410000	1420000	3830000	87900	636000	641000	1090000	1350000	1280000	949000	848000
pmb2799	295	277.5	9.74	296	[M-H]-	-	12,13-EODE	Lipids_Fatty acids	8230	7250	8170	8140	4470	9350	9230	6250	5830	7660	6860	18600	21900
pmb2804	311.1	293.4	7.87	312.1	[M-H]-	C04717	13-HPODE	Lipids_Fatty acids	177000	160000	170000	165000	74400	65200	87800	302000	188000	141000	302000	253000	253000
pmb2819	665.1	323.4	2.16	666.1	[M-H]-	-	O-Caffeoyl maltotriose	Hydroxycinnamoyl derivatives	3700	4940	4000	5120	929	9	9	2440	5730	13800	5500	3890	3270
pmb2826	147	85	1.03	148	[M-H]-	C00815	Citramalate	Organic acids	424000	669000	507000	849000	552000	512000	941000	411000	483000	720000	806000	1770000	2530000
pmb2831	315.1	153.2	2.44	316.1	[M-H]-	-	Protocatechuic acid O-glucoside	Catechin derivatives	5700000	5590000	6060000	5600000	6740000	1740000	6470000	11800000	6400000	7770000	9770000	3400000	3570000
pmb2835	181.1	151.1	3.95	182.1	[M-H]-	-	Syringaldehyde	Hydroxycinnamoyl derivatives	31300	30500	31800	29400	22700	96200	29100	33300	19200	18900	20500	7530	9320
pmb2849	347.1	319.3	4.63	348.1	[M-H]-	C01897	Camptothecin	Alkaloids	21900	22400	22100	16400	5560	16000	13000	52500	23600	19000	11000	9	9
pmb2850	329	314.2	5.73	330	[M-H]-	-	Tricin	Flavone	21400000	19200000	18300000	19300000	7570000	28200000	23500000	17900000	33300000	12800000	6880000	2910000	2000000
pmb2855	307	145.2	0.77	308	[M-H]-	-	L-Glutamine O-hexside	Amino acid derivatives	50500	65200	59800	58800	43500	92200	46100	44000	31800	112000	33000	27800	38400
pmb2857	308.1	128.2	0.8	309.1	[M-H]-	-	L-Glutamic acid O-glucoside	Amino acid derivatives	43800	58100	47800	65000	28900	35600	50200	56100	65100	118000	31700	10700	11600
pmb2858	665.1	485.3	0.81	666.1	[M-H]-	C02052	Maltotetraose	Carbohydrates	30100	38300	38600	41800	34300	43000	39100	38400	42600	37200	119000	41800	26000
pmb2867	350.1	144.2	1.72	351.1	[M-H]-	-	Kynurenic acid O-hexside	Organic acids	5950000	6400000	5930000	5910000	17500000	26100000	17200000	193000	267000	271000	42900	26300	34900
pmb2871	315.1	152.1	1.84	316.1	[M-H]-	-	2,5-dihydroxy benzoic acid O-hexside	Benzoic acid derivatives	31600000	25600000	32600000	28600000	29700000	49300000	38200000	60700000	28600000	26800000	41500000	22700000	20600000
pmb2873	214.1	134.2	3.65	215.1	[M-H]-	-	3-(2-Naphthyl)-D-alanine	Amino acid derivatives	346000	314000	367000	346000	733000	1430000	611000	312000	163000	232000	292000	174000	122000
pmb2893	291.2	119.2	2.46	292.2	[M-H]-	-	N-p-Coumaroyl hydroxyagmatine	Phenolamides	33700	30400	32800	27900	32100	9440	21300	15800	12600	16400	35900	52300	66300
pmb2922	565.1	323.3	1.11	566.1	[M-H]-	C00029	Uridine 5'-diphospho-D-glucose	Nucleotide and its derivates	3290000	3080000	4160000	3920000	4800000	3650000	4700000	5930000	5490000	10700000	3230000	1220000	1400000
pmb2928	331	313.7	2.02	332	[M-H]-	-	Gallic acid O-Hexoside	Benzoic acid derivatives	5990000	7470000	7340000	6950000	11200000	6090000	14200000	7250000	3300000	4530000	7100000	4230000	4610000
pmb2933	311.1	149.2	2.16	312.1	[M-H]-	-	Caftaric acid	Hydroxycinnamoyl derivatives	8510000	8270000	11100000	9280000	3120000	4990000	19900000	7000000	8880000	6650000	11800000	12400000	6760000
pmb2936	591.1	367.4	4.95	592.1	[M-H]-	-	Disinapoyl hexoside	Hydroxycinnamoyl derivatives	158000	147000	157000	147000	235000	110000	350000	96000	225000	22500	86900	9	9
pmb2938	353.1	191.2	3	354.1	[M-H]-	-	4-O-Caffeoyl quinic acid (criptochlorogenic acid)	Quinate and its derivatives	690000	659000	685000	698000	825000	339000	739000	700000	819000	706000	735000	557000	608000
pmb2940	385.1	223.2	3.26	386.1	[M-H]-	-	1-O-beta-D-Glucopyranosyl sinapate	Hydroxycinnamoyl derivatives	473000	468000	423000	446000	1090000	154000	2460000	59700	97400	388000	9	9	12600
pmb2947	865.1	407.2	3.44	866.1	[M-H]-	-	Catechin-catechin-catechin	Catechin derivatives	637000	580000	553000	454000	1660000	150000	621000	11700	8290	17900	145000	29200	22400
pmb2957	465.1	285.3	2.59	466.1	[M-H]-	-	Cyanidin O-syringic acid	Anthocyanins	235000	256000	292000	256000	69100	46900	184000	85400	80700	42500	4530000	270000	88400
pmb2959	489.1	285.3	2.94	490.1	[M-H]-	-	Cyanidin O-acetylhexoside	Anthocyanins	19000	26400	25000	16100	12600	5220	5030	15600	11200	9340	17900	105000	135000
pmb2961	547.1	503.4	3	548.1	[M-H]-	-	Peonidin O-malonylhexoside	Anthocyanins	564000	548000	527000	496000	1050000	2180000	2520000	9	9	9	9	9	9
pmb2979	549.2	387.3	3.91	550.2	[M-H]-	-	Hesperetin O-malonylhexoside	Flavanone	78500	91300	93700	101000	255000	184000	21400	9	4030	33400	15100	9	23600
pmb2984	491.1	287.3	5.09	492.1	[M-H]-	-	Acetyl-eriodictyol O-hexoside	Flavone	23800	21600	23400	23200	13000	9	8710	115000	58700	62900	16100	5150	9
pmb2986	709.1	547.3	2.42	710.1	[M-H]-	-	Chrysoeriol O-hexosyl-O-malonylhexoside	Flavone	29400	25700	36900	32200	30800	23800	38400	33500	19300	26100	25900	26600	18500
pmb2987	487.1	283.2	2.63	488.1	[M-H]-	-	Acacetin O-acetyl hexoside	Flavone	554000	481000	514000	506000	389000	509000	393000	481000	174000	158000	971000	652000	699000
pmb2988	624.1	285.3	3.15	625.1	[M-H]-	-	Luteolin O-hexosyl-O-gluconic acid	Flavone	316000	313000	318000	328000	57400	71300	111000	56700	247000	265000	179000	1730000	3310000
pmb2997	799.1	461.3	3.96	800.1	[M-H]-	-	Chrysoeriol O-hexosyl-O-hexosyl-O-Glucuronic acid	Flavone	55800	63500	64700	75200	51700	11600	27400	42600	85600	48300	253000	97600	72100
pmb2999	461.1	285.2	3.87	462.1	[M-H]-	-	Chrysoeriol 5-O-hexoside	Flavone	8680000	6770000	6190000	6950000	3470000	1280000	1400000	4550000	5040000	4150000	15800000	9590000	10500000
pmb3000	503.1	341.3	3.94	504.1	[M-H]-	-	Chrysoeriol O-acetylhexoside	Flavone	96700	79300	79800	88700	81500	64100	9	43900	52800	35800	310000	130000	118000
pmb3005	621.1	299.4	4.07	622.1	[M-H]-	-	Chrysoeriol O-rhamnosyl-O-glucuronic acid	Flavone	15700	13000	15900	14100	16200	11900	13400	6840	9	7580	11500	9	11800
pmb3012	461.1	460.9	4.32	462.1	[M-H]-	-	Chrysoeriol 7-O-hexoside	Flavone	239000	232000	215000	227000	248000	250000	201000	81600	185000	9	9	200000	240000
pmb3013	519.1	315.3	4.32	520.1	[M-H]-	-	Isorhamnetin O-acetyl-hexoside	Flavonol	25700	21800	17900	16800	35100	39600	11300	6980	21900	12200	21400	19600	35700
pmb3014	641.1	285.2	4.67	642.1	[M-H]-	-	Luteolin O-eudesmic acid-O-hexoside	Flavone	8330	11200	11700	14600	25200	7690	20700	9	9	9	10300	9	9
pmb3023	449.1	329.3	3.37	450.1	[M-H]-	-	Eriodictyol C-hexoside	Flavone C-glycosides	742000	638000	667000	630000	2490000	492000	506000	574000	476000	204000	490000	126000	132000
pmb3026	505.1	301.2	3.8	506.1	[M-H]-	-	Quercetin O-acetylhexoside	Flavonol	1350000	1570000	1310000	1270000	3650000	715000	260000	504000	687000	471000	3280000	2340000	3240000
pmb3032	561.1	329.3	5.69	562.1	[M-H]-	-	Tricin O-malonyl rhamnoside	Flavone	12500	13800	9420	13700	2840	4840	12300	16200	17100	5160	7640	9	9
pmb3041	521.1	329.3	3.81	522.1	[M-H]-	-	Tricin O-saccharic acid	Flavone	1190000	1150000	1130000	1230000	3600000	3340000	1430000	173000	126000	235000	248000	143000	115000
pmb3042	491.1	329.3	4	492.1	[M-H]-	-	Tricin 5-O-hexoside	Flavone	142000	166000	158000	155000	85900	126000	251000	350000	106000	131000	101000	26700	24100
pmb3045	505.1	330.3	4.17	506.1	[M-H]-	-	Tricin O-glucuronic acid	Flavone	24100	30100	26300	28100	28400	40800	19100	29800	25400	19100	31900	24900	49600
pmb3046	491.1	431.2	4.3	492.1	[M-H]-	-	Tricin 7-O-hexoside	Flavone	351000	356000	341000	342000	863000	317000	589000	49700	119000	98800	181000	169000	175000
pmb3047	657.1	495.3	4.5	658.1	[M-H]-	-	Tricin 4'-O-(syringyl alcohol) ether 5-O-hexoside	Flavonolignan	54700	44100	36000	46500	90100	102000	37400	9	9	9	12500	9020	9
pmb3055	513.1	191.2	1.82	514.1	[M-H]-	-	p-Coumaroyl quinic acid O-glucuronic acid	Quinate and its derivatives	2330000	2910000	2880000	3220000	1730000	1440000	1830000	1330000	2400000	1690000	1830000	1100000	951000
pmb3056	355.1	181.2	1.89	356.1	[M-H]-	-	Homovanilloyl quinic acid	Quinate and its derivatives	3220000	3360000	3550000	3840000	3190000	6040000	5910000	4200000	4180000	3100000	3150000	1960000	2760000
pmb3058	369	191.1	2.16	370	[M-H]-	-	Quinic acid O-glucuronic acid	Quinate and its derivatives	22700000	27600000	27500000	29000000	38900000	35100000	56700000	4960000	2820000	8940000	8560000	12900000	24000000
pmb3059	543.1	191.2	2.13	544.1	[M-H]-	-	Quinic acid O-di-glucuronic acid	Quinate and its derivatives	42500	47900	43600	57600	80900	21100	109000	573000	88500	113000	9	9	9
pmb3061	499.1	163.2	2.1	500.1	[M-H]-	-	5-O-p-coumaroyl quinic acid O-hexoside	Quinate and its derivatives	278000	250000	288000	297000	96500	372000	258000	63700	44000	38800	328000	449000	554000
pmb3062	385.1	152.2	2.12	386.1	[M-H]-	-	Eudesmoyl quinic acid	Quinate and its derivatives	975000	972000	1020000	1040000	392000	1130000	882000	1200000	905000	831000	1430000	947000	863000
pmb3064	499.2	173.2	2.5	500.2	[M-H]-	-	3-O-p-coumaroyl quinic acid O-hexoside	Quinate and its derivatives	57100	50400	53900	50700	37200	78900	36800	70000	45600	38700	165000	41800	30700
pmb3068	337.1	155.8	2.85	338.1	[M-H]-	-	1-O-p-Coumaroyl quinic acid	Quinate and its derivatives	1950000	1960000	2100000	2250000	839000	3240000	1780000	3350000	1270000	1570000	2330000	4050000	4300000
pmb3073	709.1	401.3	3.46	710.1	[M-H]-	-	O-p-Coumaroyl quinic acid O-rutinoside derivative	Quinate and its derivatives	1230000	1530000	1770000	1180000	800000	589000	955000	1500000	1490000	1780000	837000	434000	324000
pmb3074	337.1	190.9	3.3	338.1	[M-H]-	-	3-O-p-Coumaroyl quinic acid	Quinate and its derivatives	15100000	14200000	14000000	13300000	7010000	2330000	5990000	18400000	16500000	11800000	33400000	20500000	17500000
pmb3075	319	145.3	3.93	320	[M-H]-	-	3-O-p-Coumaroyl shikimic acid	Quinate and its derivatives	30100	24600	27700	25900	36800	9540	19300	21700	6460	6080	34600	33800	34300
pmb3079	300.1	79	1.15	301.1	[M-H]-	C04256	N-Acetylglucosamine 1-phosphate	Others	486000	625000	766000	707000	132000	139000	311000	613000	605000	900000	665000	621000	706000
pmb3081	289.1	97	1.08	290.1	[M-H]-	-	Glucarate O-Phosphoric acid	Carbohydrates	4610000	5390000	5450000	4630000	8940000	11700000	9270000	10800000	12200000	8200000	1850000	694000	675000
pmb3088	421.1	241.2	0.71	422.1	[M-H]-	C00689	Trehalose 6-phosphate	Carbohydrates	85300	120000	146000	126000	107000	147000	127000	108000	154000	141000	219000	151000	125000
pmb3093	351.1	132.6	2.39	352.1	[M-H]-	-	6,7-dihydroxycoumarin 7-O-quinic acid	Coumarins	41900000	32200000	32100000	31800000	19300000	37100000	26600000	37900000	46000000	39500000	64100000	36200000	29900000
pmb3094	703.4	351.3	2.35	704.4	[M-H]-	-	Esculetin O-quinacyl esculetin O-quinic acid	Coumarins	7720000	5480000	5880000	4920000	2110000	6290000	3340000	7290000	9300000	8430000	14100000	5790000	4260000
pmb3099	153	78.9	1.56	154	[M-H]-	C06608	Diethyl phosphate	Organic acids	1200000	1180000	1270000	1210000	671000	1370000	688000	11300000	1200000	3140000	3250000	1090000	1230000
pmb3101	175.1	131.3	2.75	176.1	[M-H]-	C02504	2-Isopropylmalate	Organic acids	3350000	3740000	3670000	3660000	1250000	365000	1320000	1880000	3720000	7660000	2030000	7580000	9970000
pmb3107	359.1	197.1	2.26	360.1	[M-H]-	-	Syringic acid O-glucoside	Benzoic acid derivatives	484000	514000	550000	524000	941000	1640000	497000	161000	149000	188000	227000	218000	190000
pmb3110	167	152.1	3.31	168	[M-H]-	C06672	Vanillic acid	Hydroxycinnamoyl derivatives	3370000	2910000	3300000	3160000	1120000	2210000	2800000	4860000	2690000	3090000	5670000	2890000	3230000
pmb3114	561.1	271.3	3.61	562.1	[M-H]-	-	Epicatechin-epiafzelechin	Catechin derivatives	35900	32800	27100	23100	128000	18400	55900	9	9	9	34700	9380	9
pmb3264	611.1	306.2	1.17	612.1	[M-H]-	C00127	Glutathione oxidized	Amino acid derivatives	178000	214000	279000	273000	60600	34600	117000	1180000	461000	319000	176000	36200	73600
pmb3317	371.1	179.2	1.85	372.1	[M-H]-	-	Quinacyl syringic acid	Quinate and its derivatives	1370000	1830000	1800000	1780000	2030000	1410000	3330000	622000	1010000	1460000	397000	312000	447000
pmb3894	329.1	314.3	5.91	330.1	[M-H]-	-	Di-O-methylquercetin	Flavonol	366000	328000	320000	332000	194000	255000	221000	544000	307000	257000	255000	631000	718000
pmb4777	337.1	143.2	4.4	338.1	[M-H]-	-	4-Hydroxy-7-methoxycoumarin-beta-rhamnoside	Coumarins	1030000	988000	946000	948000	1490000	1220000	1790000	570000	653000	479000	1050000	587000	528000
pmc0066	333.1	137	0.7	332.1	[M+H]+	C06196	2'-Deoxyinosine-5'-monophosphate	Nucleotide and its derivates	1900000	1330000	1490000	1540000	3730000	10000000	3270000	4220000	3810000	3450000	416000	288000	258000
pmc0274	167.1	121	1.92	166.1	[M+H]+	C16614	6-Methylmercaptopurine	Nucleotide and its derivates	15400000	38300000	36500000	38200000	8960000	6630000	10900000	62300000	53000000	40300000	56800000	53800000	57000000
pmc0281	400.2	136.1	1.94	399.2	[M+H]+	-	Adenosine O-ribose	Nucleotide and its derivates	4940000	5410000	5960000	6100000	3900000	3380000	10600000	8340000	8850000	8240000	1720000	1750000	1850000
pmc0304	384.1	252.2	2.06	383.1	[M+H]+	-	Succinyladenosine	Nucleotide and its derivates	1720000	2970000	2590000	2490000	2760000	3340000	3990000	3070000	2270000	3210000	1770000	1910000	2000000
pmc0682	133.1	105	4.32	132.1	[M+H]+	-	4-Aminoindole	Indole derivatives	103000	279000	324000	326000	949000	9	928000	97600	104000	114000	125000	134000	150000
pmc0960	544.4	544.4	8.91	543.4	[M+H]+	-	LysoPC 20:4	Lipids_Glycerophospholipids	18700000	18800000	16900000	15900000	964000	2370000	2350000	1970000	8160000	14800000	4850000	85500000	97000000
pmc1990	299.1	74.8	6.78	300.1	[M-H]-	-	4'-Hydroxy-5,7-dimethoxyflavanone	Flavanone	58400	65500	64400	72300	15700	13800	19600	49900	22100	40600	26700	24200	29200
pmd0017	203	112	0.62	202	[M+H]+	C00750	Spermine	Phenolamides	25000000	33800000	30200000	31100000	35600000	29100000	30800000	27300000	25000000	29300000	35500000	30100000	24700000
pmd0023	266	134.2	1.81	267	[M-H]-	C00212	Adenosine	Nucleotide and its derivates	3040000	3400000	3620000	3410000	618000	1550000	2930000	7740000	5550000	4370000	6500000	5360000	3740000
pmd0130	468.3	450.5	7.73	467.3	[M+H]+	-	LysoPC 14:0 (2n isomer)	Lipids_Glycerophospholipids	1360000	1470000	1480000	1400000	428000	333000	499000	1770000	1350000	717000	4090000	3880000	3720000
pmd0132	496.3	478.3	8.8	495.3	[M+H]+	-	LysoPC 16:0 (2n isomer)	Lipids_Glycerophospholipids	24700000	29000000	25900000	27300000	13300000	24200000	41000000	25900000	43200000	25100000	80800000	111000000	101000000
pmd0136	524.4	507.4	9.91	523.4	[M+H]+	-	LysoPC 18:0	Lipids_Glycerophospholipids	11800000	14300000	13000000	13300000	7540000	33600000	78200000	14400000	81200000	38500000	50200000	148000000	153000000
pmd0144	550.4	245.1	9.96	549.4	[M+H]+	-	LysoPC 20:1 (2n isomer)	Lipids_Glycerophospholipids	827000	1240000	1180000	1140000	114000	365000	609000	523000	1920000	935000	748000	7410000	6920000
pmd0145	550.4	245.1	10	549.4	[M+H]+	-	LysoPC 20:1	Lipids_Glycerophospholipids	965000	1260000	1130000	1170000	98400	442000	673000	512000	1960000	1130000	767000	7790000	7400000
pmd0158	424.2	285.8	7.51	425.2	[M-H]-	-	LysoPE 14:0 (2n isomer)	Lipids_Glycerophospholipids	4470	3330	2890	4230	288	558	1190	2640	3090	2510	5450	25300	24100
pmd0160	452.3	255.3	8.73	453.3	[M-H]-	-	LysoPE 16:0 (2n isomer)	Lipids_Glycerophospholipids	9830000	8380000	9440000	8490000	2420000	7670000	15900000	4540000	31700000	9730000	28400000	105000000	103000000
pme0003	188.1	145.2	0.81	189.111	[M-H]-	C02427	L-Homocitrulline	Amino acids	30700	25900	24700	26600	21000	14200	22600	36100	37600	35700	44500	33400	38600
pme0005	121	121	1.44	120.044	[M+H]+	C15587	Purine	Nucleotide and its derivates	6930000	12200000	11600000	11700000	2490000	84600	3110000	23800000	4370000	2790000	74400000	43200000	18000000
pme0006	116.1	70	0.81	115.063	[M+H]+	C00148	L-Proline	Amino acids	2630000	3600000	3470000	3730000	188000	80500	184000	6180000	1010000	3940000	2520000	1650000	1150000
pme0007	174.1	131.1	0.79	175.096	[M-H]-	C00327	L-Citrulline	Amino acids	2820000	2500000	2540000	2820000	68600	18500	125000	2250000	675000	2260000	2040000	6710000	10700000
pme0009	104	73.9	0.79	105.043	[M-H]-	C00065	L-Serine	Amino acids	698000	797000	875000	813000	94400	61200	83100	1200000	1320000	1150000	1070000	960000	826000
pme0011	132	99.9	0.8	133.037	[M-H]-	C00049	L-Aspartic acid	Amino acids	2760000	3010000	3550000	3260000	844000	1640000	1520000	4290000	2980000	3570000	5890000	6260000	3690000
pme0013	146.1	102.1	0.75	147.053	[M-H]-	C00025	L-Glutamic acid	Amino acids	5800000	7050000	7160000	6580000	5280000	3700000	5500000	7960000	10100000	10100000	8190000	6180000	5380000
pme0018	130.1	130.1	1.27	131.095	[M-H]-	C00123	L-Leucine	Amino acids	77500	78800	84700	92300	30000	39900	25500	112000	118000	70900	93100	191000	152000
pme0020	164.1	147.1	1.92	165.079	[M-H]-	C00079	L-Phenylalanine	Amino acids	17600000	17700000	18200000	18800000	3360000	2340000	3900000	33700000	23400000	22800000	27300000	23600000	26300000
pme0022	118	100.9	0.76	119.058	[M-H]-	C00188	L-Threonine	Amino acids	579000	488000	666000	555000	167000	146000	197000	1470000	876000	709000	900000	743000	570000
pme0026	147	83.2	0.78	146.106	[M+H]+	C00047	L-(+)-Lysine	Amino acids	4820000	10500000	9740000	9400000	4090000	6480000	6850000	13800000	13300000	16600000	9330000	6900000	9230000
pme0031	127	110	1.59	126.043	[M+H]+	C00178	Thymine	Nucleotide and its derivates	75000	141000	147000	139000	56900	51500	40800	495000	277000	161000	367000	237000	140000
pme0032	135	92	1.16	136.038	[M-H]-	C00262	Hypoxanthine	Nucleotide and its derivates	17100	23900	24500	27000	42700	53200	9510	17900	22100	13700	23700	28700	22600
pme0036	154.1	92.9	0.72	155.07	[M-H]-	C00135	L-Histidine	Amino acids	118000	122000	126000	147000	7570	6170	19800	109000	67800	93500	323000	280000	346000
pme0038	112	95	0.82	111.043	[M+H]+	C00380	Cytosine	Nucleotide and its derivates	1520000	2270000	1650000	2210000	1500000	1720000	1770000	5720000	3110000	1910000	3390000	2110000	1740000
pme0039	118.1	71.8	0.85	117.079	[M+H]+	C00183	L-Valine	Amino acids	23700000	36300000	36400000	36400000	24700000	18100000	25600000	57300000	49000000	49100000	45000000	43700000	41600000
pme0042	173.1	131.1	0.73	174.112	[M-H]-	C00062	L-(+)-Arginine	Amino acids	1960000	2230000	2230000	2130000	10500	9	148000	54900	118000	286000	4550000	7450000	7360000
pme0050	203	116.1	2.39	204.09	[M-H]-	C00078	L-Tryptophan	Amino acids	27900000	27800000	27900000	28800000	579000	568000	1300000	59600000	21600000	9440000	98000000	56000000	40300000
pme0056	145.1	101	2.57	146.058	[M-H]-	-	2,3-dimethylsuccinic acid	Amino acid derivatives	2180000	2140000	2280000	2210000	186000	112000	403000	3250000	5140000	3750000	2550000	4370000	4230000
pme0058	555.3	495.3	7.42	556.304	[M-H]-	C08797	Cucurbitacin E	Terpenoids	3020	4410	2950	2590	4510	1940	9	3710	3030	2500	4800	4960	5470
pme0066	116.1	73.9	0.75	117.054	[M-H]-	C00581	Guanidineacetic acid	Amino acid derivatives	8560	11400	11100	7150	1560	2530	1710	9120	14500	9400	12000	13600	14900
pme0075	188.1	102	1.18	189.064	[M-H]-	C00624	N-Acetyl-L-glutamic acid	Amino acid derivatives	401000	391000	434000	421000	529000	453000	469000	323000	262000	369000	263000	187000	283000
pme0088	285	133.1	5	286	[M-H]-	C01514	Luteolin	Flavone	202000	200000	183000	193000	176000	85700	183000	10700	228000	44400	154000	166000	332000
pme0108	126.1	126.1	1.16	125.059	[M+H]+	C02376	5-Methylcytosine	Nucleotide and its derivates	32500	52500	36500	38800	51700	37500	71000	91800	58200	64000	46800	27400	35900
pme0109	212.2	166.1	1.45	211.084	[M+H]+	C07194	(-)-3-(3,4-Dihydroxyphenyl)-2-methylalanine	Amino acid derivatives	306000	432000	478000	437000	130000	317000	222000	569000	286000	259000	615000	717000	681000
pme0113	251.3	84	1.13	250.062	[M+H]+	C00669	γ-Glu-Cys	Amino acid derivatives	20400	38600	35600	31300	19000	16100	46400	60800	51400	52300	69900	83300	83200
pme0118	110.1	65.9	3	111.032	[M-H]-	C05942	Pyrrole-2-carboxylic acid	Amino acid derivatives	89700	80700	76900	77200	26200	57800	101000	93600	46100	128000	26200	55700	49800
pme0120	118.2	101	0.84	117.079	[M+H]+	C00431	5-Aminovaleric acid	Amino acid derivatives	90200	93300	83400	106000	53400	132000	191000	88400	176000	163000	40400	66500	67000
pme0122	189.2	84	1.14	188.116	[M+H]+	C02727	N6-Acetyl-L-lysine	Amino acid derivatives	563000	819000	1010000	672000	209000	311000	419000	761000	1200000	974000	2890000	2330000	1740000
pme0128	159.2	88	0.75	160.085	[M-H]-	C00993	D-Alanyl-D-Alanine	Amino acid derivatives	7590	11100	7650	6740	5860	5830	4070	25800	11400	8200	28200	15300	11600
pme0130	165.1	165.1	1.85	166.049	[M-H]-	C16357	3-Methylxanthine	Nucleotide and its derivates	51600	50700	56000	52400	116000	228000	65200	4890	11200	14300	10800	11400	14400
pme0133	281.3	120	2.37	280.106	[M+H]+	-	Asp-phe	Amino acid derivatives	744000	839000	836000	798000	405000	314000	805000	1090000	1030000	1060000	1880000	1590000	1470000
pme0137	187.2	127.1	1.11	188.08	[M-H]-	-	Nα-Acetyl-L-glutamine	Amino acid derivatives	1610000	1490000	1800000	1630000	2340000	1900000	1480000	1470000	1400000	4150000	1230000	600000	407000
pme0151	115	115.1	1.27	114.043	[M+H]+	C00429	Dihydrouracil	Nucleotide and its derivates	62100	141000	135000	107000	23300	39800	48400	221000	185000	147000	110000	123000	181000
pme0152	129.1	86	1.57	128.059	[M+H]+	C00906	5,6-Dihydro-5-methyluracil	Nucleotide and its derivates	258000	491000	448000	456000	61900	9	93700	661000	490000	550000	824000	846000	795000
pme0161	118.1	101	0.75	119.058	[M-H]-	C00263	L-Homoserine	Amino acids	20800	20000	19600	20800	5320	5900	4490	40100	23900	28300	24300	14100	14500
pme0163	335.1	122.8	0.8	334.057	[M+H]+	C00455	β-Nicotinamide mononucleotide	Nucleotide and its derivates	4960000	3640000	4890000	5070000	5450000	13900000	6230000	6590000	8420000	6560000	6620000	4340000	873000
pme0164	263.1	189	3.9	264.111	[M-H]-	C05642	N-γ-Acetyl-N-2-Formyl-5-methoxykynurenamine	Amino acid derivatives	85300	72100	77900	63300	72000	143000	37100	289000	41700	83200	89300	8840	6890
pme0165	165.1	165.1	1.94	166.049	[M-H]-	C16358	1-Methylxanthine	Nucleotide and its derivates	116000	112000	122000	96100	99800	88200	36000	218000	205000	156000	87600	64700	40000
pme0174	132.1	72.8	1.29	131.058	[M+H]+	-	N-Propionylglycine	Amino acid derivatives	138000	207000	205000	202000	93200	93200	112000	284000	265000	225000	203000	255000	338000
pme0176	263.1	145.1	3.17	264.111	[M-H]-	C04148	Phenylacetyl-L-glutamine	Amino acid derivatives	23100	22800	25600	24600	30300	6150	41800	16700	21000	23500	18400	14200	16600
pme0180	168.1	151.1	0.72	169.085	[M-H]-	C01152	1-Methylhistidine	Amino acid derivatives	12600	12000	16400	18400	8430	3980	7720	22100	21600	15800	20100	27900	19500
pme0183	152.1	135.1	0.86	151.049	[M+H]+	-	2-Hydroxy-6-aminopurine	Nucleotide and its derivates	1040000	1640000	1930000	2910000	756000	3270000	1440000	4190000	2560000	2550000	3650000	2320000	1690000
pme0190	187.1	130.1	1.91	188.116	[M-H]-	C02155	N-Glycyl-L-leucine	Amino acid derivatives	106000	103000	123000	100000	13700	14700	17800	231000	149000	119000	152000	190000	154000
pme0196	285	214	5.73	286.048	[M-H]-	C05903	Kaempferol	Flavonol	704000	662000	666000	652000	704000	26000	102000	11500	101000	56300	384000	2210000	3590000
pme0197	609.2	609.1	3.7	610.153	[M-H]-	C05625	Quercetin 3-O-rutinoside (Rutin)	Flavonol	7050000	6260000	6810000	6470000	840000	2430000	873000	31100000	2580000	3240000	38800000	3170000	659000
pme0199	301	151.1	5.12	302.043	[M-H]-	C00389	Quercetin	Flavonol	6600000	6460000	6960000	7120000	8260000	963000	2360000	1200000	2400000	1280000	11400000	12400000	20700000
pme0205	289.1	125	3	290.079	[M-H]-	C06562	Catechin	Catechin derivatives	1700000	1550000	1500000	1400000	3810000	1810000	2700000	1170000	267000	288000	815000	248000	142000
pme0207	103	103	1.29	104.047	[M-H]-	-	3-Hydroxybutyrate	Organic acids	1560000	1560000	1870000	1730000	434000	383000	459000	3550000	2130000	2730000	2790000	1350000	942000
pme0208	537.1	537	5.88	538.09	[M-H]-	C10018	Amentoflavone	Flavone	90700	93200	83200	107000	114000	112000	165000	42500	75400	116000	31600	12600	12300
pme0226	131.1	71.8	0.78	132.054	[M-H]-	C00152	L-Asparagine	Amino acids	154000	145000	151000	163000	15500	17600	18200	162000	97600	140000	229000	310000	436000
pme0233	188	144.1	2.64	189.043	[M-H]-	C01717	Kynurenic acid	Organic acids	22400000	20300000	21100000	22000000	20100000	19700000	15600000	11200000	18500000	20300000	8500000	12400000	11100000
pme0237	183.1	137.1	4.77	182.058	[M+H]+	-	Ethyl 3,4-Dihydroxybenzoate (Ethyl protocatechuate)	Organic acids	74300	90700	45200	49600	79600	67700	59900	56200	81100	72000	81300	50800	52900
pme0240	121	77	4.57	122.037	[M-H]-	C00180	Benzoic acid	Benzoic acid derivatives	1420000	1270000	1380000	1400000	255000	425000	393000	1880000	6860000	3080000	1040000	872000	639000
pme0243	131	86.9	1.86	132.042	[M-H]-	C00489	Glutaric acid	Organic acids	1960000	1890000	2160000	2210000	896000	312000	1840000	2470000	3720000	3550000	1490000	2400000	744000
pme0245	145.1	80.9	2.58	146.058	[M-H]-	C06104??	Adipic acid	Organic acids	1580000	1530000	1590000	1710000	136000	105000	304000	4870000	4770000	6330000	3010000	2890000	2990000
pme0247	130.1	128	0.76	131.058	[M-H]-	C01157	trans-4-Hydroxy-L-proline	Amino acid derivatives	47800	50200	46100	56600	15200	10300	12900	112000	42000	77700	103000	87000	43200
pme0249	189.1	97	4.47	188.105	[M+H]+	C08261	Azelaic acid	Organic acids	60300	95200	124000	108000	69700	62600	74000	113000	135000	167000	178000	64700	63800
pme0250	187.1	125.1	4.47	188.105	[M-H]-	C08261	Azelaic Acid	Organic acids	2510000	2340000	2400000	2370000	1150000	1400000	1520000	4610000	3290000	3920000	6510000	3740000	3270000
pme0252	172.1	130	3.51	173.105	[M-H]-	C02710	N-Acetyl-l-leucine	Amino acid derivatives	254000	194000	226000	222000	85800	111000	286000	129000	108000	356000	68500	206000	227000
pme0256	151	108	1.19	152.033	[M-H]-	C00385	Xanthine	Nucleotide and its derivates	120000	126000	131000	117000	234000	350000	242000	65100	129000	83400	86700	166000	60600
pme0257	111	111	1.23	112.027	[M-H]-	C00106	Uracil	Nucleotide and its derivates	108000	123000	121000	166000	196000	246000	193000	113000	162000	147000	108000	85500	56600
pme0264	243.1	127.1	1.99	242.09	[M+H]+	C00214	Thymidine	Nucleotide and its derivates	105000	139000	119000	126000	9	9	9	253000	114000	267000	252000	233000	128000
pme0266	201.1	139.1	5.06	202.12	[M-H]-	C08277	Sebacate	Organic acids	3640	2760	5500	4470	2500	9	1920	13700	9700	3440	10200	5110	3320
pme0267	131	86.9	2.12	132.042	[M-H]-	-	glucose-6-phosphate	Carbohydrates	8920000	9320000	9700000	9830000	5840000	3810000	7620000	22300000	15900000	14900000	14800000	50200000	9790000
pme0269	229.2	167.2	6.16	230.152	[M-H]-	C02678	Dodecanedioic aicd	Organic acids	6020	7050	7930	6280	5640	4360	5110	6320	7590	5200	10700	6980	4830
pme0272	149	76.9	2.43	150.032	[M-H]-	C02137	Benzoylformic acid	Organic acids	138000	101000	102000	123000	9	9	9	85200	109000	169000	75100	86400	67600
pme0274	132.1	76.9	1.2	131.095	[M+H]+	C02378	6-Aminocaproic acid	Organic acids	11000000	16300000	14900000	14600000	6330000	6100000	8600000	20600000	19400000	16700000	14900000	19700000	25400000
pme0275	115	97.9	1.93	116.047	[M-H]-	-	4-Oxopentanoate	Organic acids	24200	18500	17600	27000	14500	18700	18800	33100	28500	26100	32600	30100	25600
pme0279	189.1	128.1	0.79	190.095	[M-H]-	C00666	2,6-Diaminooimelic acid	Amino acid derivatives	204000	190000	169000	141000	356000	262000	264000	216000	199000	235000	132000	80400	236000
pme0281	165	121.1	2.96	166.027	[M-H]-	C06337	Terephthalic acid	Organic acids	2340000	2330000	2410000	2430000	2270000	2940000	2330000	15500000	2320000	2940000	3190000	1550000	1370000
pme0282	165	76.9	2.95	166.027	[M-H]-	C01606	Phthalic acid	Organic acids	173000	171000	183000	173000	207000	268000	204000	347000	194000	216000	252000	158000	136000
pme0284	144.1	102	0.84	145.085	[M-H]-	C01035	4-Guanidinobutyric acid	Organic acids	24800	42700	41300	43200	37200	9	33000	27300	26700	35700	35200	50700	102000
pme0286	131.1	85	3.52	132.079	[M-H]-	-	2-Hydroxyisocaproic acid	Organic acids	56500	51600	53700	59200	26100	24500	157000	56100	45100	66000	25800	33200	31400
pme0289	151.1	78.8	5.93	150.068	[M+H]+	-	4-Ethylbenzoic acid	Organic acids	16800	23000	28500	22800	12200	20700	12200	118000	25500	20100	40700	15000	8930
pme0292	195.1	121	3.95	196.074	[M-H]-	-	pyruvate	Organic acids	114000	106000	124000	119000	74500	49800	66000	118000	73500	73000	248000	135000	425000
pme0299	147.1	61.8	5.45	148.052	[M-H]-	C00423	Cinnamic acid	Hydroxycinnamoyl derivatives	222000	191000	208000	193000	125000	32100	222000	77600	102000	117000	89700	66600	56600
pme0303	179	135.1	3.23	180.042	[M-H]-	C01197	Caffeic acid	Hydroxycinnamoyl derivatives	1950000	1770000	1740000	1590000	2940000	892000	1260000	309000	756000	1250000	432000	334000	367000
pme0305	193.1	134.1	4.07	194.058	[M-H]-	C01494	Ferulic acid	Hydroxycinnamoyl derivatives	9070000	8860000	9710000	9930000	7140000	6640000	14600000	12900000	4310000	5180000	17000000	4620000	3670000
pme0307	227.1	143.1	4.78	228.079	[M-H]-	C03582	Resveratrol	Hydroxycinnamoyl derivatives	39900	26400	35400	29900	93200	9	11200	4840	7910	548	119000	43800	44100
pme0309	183	124.1	3.14	184.037	[M-H]-	-	Methyl gallate	Benzoic acid derivatives	17000	19400	18900	21700	48400	36500	45500	9	9	7530	27700	14300	9
pme0321	431.1	285.1	4.94	432.106	[M-H]-	-	Kaempferol 7-O-rhamnoside	Flavonol	199000	316000	290000	279000	224000	614000	368000	88500	251000	91000	205000	255000	432000
pme0324	255.1	69.7	6.95	254.058	[M+H]+	C10028	Chrysin	Flavone	33800	59700	37200	37200	39800	29100	33100	9	14200	7980	17400	10700	18100
pme0330	579.2	135	4.17	580.179	[M-H]-	C09789	Naringenin 7-O-neohesperidoside (Naringin)	Flavanone	102000	68000	76100	72200	43500	103000	25500	2160000	77500	77800	56500	9	9
pme0332	577.2	269.1	4.01	578.164	[M-H]-	C12627	Apigenin 7-O-neohesperidoside (Rhoifolin)	Flavone	9	9	9	9	9	9	9	10400	9	9	9	35100	70700
pme0355	255.1	199.1	4.97	254.058	[M+H]+	C10208	Daidzein	Isoflavone	34800	64500	64300	73000	45400	48500	32300	52700	61500	75700	66400	29500	28000
pme0359	433.1	313.1	3.81	432.106	[M+H]+	-	Apigenin 5-O-glucoside	Flavone	279000	395000	414000	352000	1540000	551000	1090000	952000	899000	374000	77300	49300	49600
pme0361	435.1	303	3.98	434.085	[M+H]+	-	Quercetin 3-alpha-L-arabinofuranoside (Avicularin)	Flavonol	11600000	19200000	18300000	18000000	4970000	9870000	7470000	35900000	23500000	14200000	52600000	25900000	24200000
pme0363	299.1	284	5.76	300.063	[M-H]-	C04293	Chrysoeriol	Flavone	10500000	9870000	10100000	10300000	4650000	7980000	14000000	12200000	16900000	4960000	49700000	10400000	4050000
pme0368	579.2	271.1	4.01	578.164	[M+H]+	-	Apigenin 7-rutinoside (Isorhoifolin)	Flavone	94900	83100	71000	124000	9	178000	593000	137000	27700	49000	44400	9	25300
pme0369	593.2	285.1	3.83	594.159	[M-H]-	-	Kaempferol 3-O-rutinoside (Nicotiflorin)	Flavonol	1560000	1450000	1590000	1440000	292000	1020000	231000	8380000	2000000	876000	4000000	1970000	847000
pme0371	433.1	122.9	4.22	434.121	[M-H]-	C09099	Naringenin 7-O-glucoside (Prunin)	Flavanone	4260000	4000000	4000000	4140000	6100000	2650000	3700000	2130000	2340000	1220000	1630000	1690000	2630000
pme0374	431.1	431.1	3.79	432.106	[M-H]-	C01714	Isovitexin	Flavone C-glycosides	25100	34600	29000	26100	174000	221000	110000	751000	36900	27100	9	9	9
pme0376	271.1	151	5.59	272.068	[M-H]-	C00509	Naringenin	Flavanone	13700000	12500000	12300000	12400000	7430000	1770000	7910000	7740000	8320000	6270000	13700000	20300000	26100000
pme0379	271.1	215.1	5.63	270.053	[M+H]+	C01477	Apigenin	Flavone	908000	1290000	1290000	1310000	907000	787000	904000	150000	2690000	355000	1480000	331000	238000
pme0387	181.1	137.1	3.04	182.058	[M-H]-	C05582	Homovanillic acid	Hydroxycinnamoyl derivatives	11500	13600	10600	10800	11400	7320	5150	7000	3550	7930	17100	15600	13700
pme0390	175	175	4.61	176.047	[M-H]-	-	4-Methylumbelliferone	Hydroxycinnamoyl derivatives	79700	71400	76300	53800	83800	113000	113000	31100	31200	63800	9	4970	6950
pme0397	173.1	92.9	0.81	174.053	[M-H]-	C00493	Shikimic acid	Organic acids	826000	1040000	962000	847000	859000	395000	1980000	497000	1540000	1790000	691000	1530000	989000
pme0398	353.1	191.1	2.72	354.095	[M-H]-	C00852	Chlorogenic acid (3-O-Caffeoylquinic acid)	Quinate and its derivatives	2390000	2460000	2500000	2570000	1910000	1590000	1890000	2500000	3030000	2270000	3360000	3040000	2780000
pme0408	197.1	122.9	3.41	198.053	[M-H]-	C10833	Syringic acid	Hydroxycinnamoyl derivatives	649000	591000	633000	591000	492000	1790000	1120000	424000	219000	325000	373000	232000	217000
pme0413	151	136.1	4	152.047	[M-H]-	C00755	Vanillin	Benzoic acid derivatives	2490000	2130000	2120000	2090000	1670000	4580000	1390000	5000000	1170000	1610000	4870000	314000	135000
pme0418	165.1	92.9	3.71	166.063	[M-H]-	C01744	3-(4-Hydroxyphenyl)propionic acid	Hydroxycinnamoyl derivatives	338000	344000	352000	316000	469000	129000	205000	342000	232000	353000	350000	183000	153000
pme0422	193.1	134.1	4.08	194.058	[M-H]-	-	3-Hydroxy-4-methoxycinnamic acid	Hydroxycinnamoyl derivatives	9100000	9350000	9920000	10100000	6900000	6870000	15100000	13800000	4370000	5070000	16300000	4610000	3520000
pme0424	133.1	115	5.97	132.058	[M+H]+	C00903	trans-cinnamaldehyde	Hydroxycinnamoyl derivatives	77600	108000	92900	94200	98400	45000	71900	26100	66400	33200	140000	76600	76900
pme0428	237.1	103.1	5.18	238.084	[M-H]-	-	3,4,5-Trimethoxycinnamic acid	Hydroxycinnamoyl derivatives	24500	23500	24500	25100	2630	9	8370	84100	54100	110000	26900	4110	4300
pme0431	577	287.9	3.68	576.127	[M+H]+	-	Procyanidin A1	Proanthocyanidins	838000	1230000	1680000	1400000	9	415000	899000	88600	1290000	259000	814000	79600	36600
pme0434	577	407.3	3.03	578.142	[M-H]-	-	Procyanidin B2	Proanthocyanidins	12500000	10500000	11400000	11300000	26700000	6680000	14800000	3130000	408000	953000	5640000	1220000	737000
pme0436	577.1	407.3	2.79	578.142	[M-H]-	-	Procyanidin B3	Proanthocyanidins	13000000	11600000	11200000	10200000	30900000	7130000	16000000	2800000	403000	996000	5710000	1330000	753000
pme0442	303	149.3	2.98	303.24	Protonated	C05908	Delphinidin	Anthocyanins	96000	334000	274000	300000	9	9	9	89100	152000	9	201000	1150000	1810000
pme0450	289	78.8	3.32	290.3	[M-H]-	C09727	L-Epicatechin	Catechin derivatives	1840000	1440000	1450000	1390000	1830000	2030000	1750000	442000	107000	166000	2540000	743000	673000
pme0486	117	100	1.33	118.027	[M-H]-	C02170	Methylmalonic acid	Organic acids	10200000	10200000	10700000	11400000	8240000	4780000	11400000	9480000	11900000	13100000	9150000	11000000	11300000
pme0496	122	77.9	1.16	123	[M-H]-	C00253	Nicotinic acid	Nicotinic acid derivatives	157000	164000	249000	167000	82000	42900	79400	136000	121000	196000	72200	119000	126000
pme0499	181	70.9	0.76	182.079	[M-H]-	C00794	D-Sorbitol	Alcohols and polyols	118000	161000	160000	157000	191000	333000	278000	249000	209000	158000	182000	105000	79300
pme0500	503.4	323.2	0.81	504.169	[M-H]-	-	D(+)-Melezitose	Carbohydrates	101000	86400	128000	127000	340000	289000	212000	79200	65200	49400	313000	36700	28300
pme0513	151	70.8	0.77	152.069	[M-H]-	C00379	Xylitol	Alcohols and polyols	57600	53200	55800	49200	48200	36800	109000	89700	127000	86300	65000	87700	85000
pme0516	179.2	87	0.74	180.063	[M-H]-	C00137	Inositol	Others	11000000	13000000	13100000	12200000	14000000	25700000	16100000	12600000	12600000	11200000	8210000	5700000	4870000
pme0519	341	58.8	0.8	342.116	[M-H]-	-	D-(+)-Sucrose	Carbohydrates	20200000	22000000	27700000	20700000	31400000	30700000	23400000	15100000	18200000	17400000	25400000	22000000	29600000
pme0534	195.2	75.1	0.63	196.058	[M-H]-	C00257	Gluconic acid	Carbohydrates	3920000	4250000	4550000	4170000	4490000	5110000	3870000	2680000	3420000	4230000	4550000	5330000	4530000
pme0543	160.1	116	4.37	161.048	[M-H]-	-	Indole-5-carboxylic acid	Indole derivatives	122000	125000	108000	118000	45500	71800	94500	114000	90800	76400	133000	131000	103000
pme1001	136.1	93.9	1.27	137.084	[M-H]-	C00483	L-Tyramine	Amino acids	30900	35600	32700	35200	5580	9	7880	69000	9890	8150	398000	208000	66500
pme1014	445.3	281	10.77	444.303	[M+H]+	C00828	Menaquinone (K2)	Vitamins	2500000	2320000	3490000	4010000	580000	538000	625000	691000	401000	370000	744000	476000	531000
pme1021	177.1	70.8	0.86	178.048	[M-H]-	C00198	D-(+)-Glucono-1,5-lactone	Carbohydrates	153000	147000	149000	158000	186000	192000	281000	165000	196000	168000	160000	169000	189000
pme1055	207.1	144.1	1.92	208.085	[M-H]-	C00328	L-Kynurenine	Amino acid derivatives	14400	17200	18700	19000	3690	3050	5650	11500	11400	28300	21200	51900	61700
pme1063	243.1	110	1.24	244.07	[M-H]-	C00299	Uridine	Nucleotide and its derivates	7600000	9040000	8450000	8650000	1000000	1540000	2530000	16900000	9850000	8360000	17100000	15200000	13000000
pme1070	180.1	163	1.16	181.074	[M-H]-	C00082	L-(-)-Tyrosine	Amino acids	547000	589000	517000	499000	162000	34900	84200	645000	438000	383000	1130000	973000	1070000
pme1090	308	162	1.16	307.084	[M+H]+	C00051	Glutathione reduced form	Amino acid derivatives	53600	65900	72900	60200	9	9	91800	127000	101000	162000	41300	91600	84800
pme1097	134.1	134.1	1.17	135.055	[M-H]-	C00147	Adenine	Nucleotide and its derivates	1170000	1470000	1590000	1480000	149000	194000	39000	2140000	1380000	1630000	1970000	2510000	2920000
pme1104	130.1	130.1	1.26	131.095	[M-H]-	C00407	L-Isoleucine	Amino acids	38400	34300	45900	35800	19200	10800	12400	46900	45600	34200	48400	96500	76700
pme1107	150	132.9	1.32	151.049	[M-H]-	C00242	Guanine	Nucleotide and its derivates	14200	22600	25900	24200	2130	9	9	39200	24900	12900	47200	57000	85300
pme1115	267.1	135.1	0.83	268.081	[M-H]-	C00294	Inosine	Nucleotide and its derivates	94100	65200	95600	102000	57900	47500	48000	93200	105000	119000	133000	78700	183000
pme1162	169	122.8	1.74	170.022	[M-H]-	C01424	Gallic acid	Benzoic acid derivatives	422000	663000	369000	452000	779000	355000	1260000	111000	9	9	720000	374000	109000
pme1175	282.1	150.1	1.5	283.092	[M-H]-	C00387	Guanosine	Nucleotide and its derivates	32400000	36200000	36800000	37000000	3860000	5650000	11400000	66100000	50400000	39800000	62700000	60300000	55600000
pme1181	266.1	150.1	1.68	267.097	[M-H]-	C00330	Deoxyguanosine	Nucleotide and its derivates	230000	225000	249000	255000	35400	23500	48100	671000	280000	251000	494000	273000	228000
pme1187	257.1	125.1	1.76	258.085	[M-H]-	-	5-Methyluridine	Nucleotide and its derivates	18600	18800	12600	17300	6650	12200	16500	27400	18800	9100	25000	15200	12600
pme1194	228	112	1.16	227.091	[M+H]+	C00881	Deoxycytidine	Nucleotide and its derivates	169000	272000	287000	298000	59000	39800	62000	814000	459000	262000	718000	272000	243000
pme1201	273.1	167.1	5.56	274.084	[M-H]-	C00774	Phloretin	Flavanone	3140000	2880000	2850000	2800000	13300000	638000	1790000	176000	165000	91700	1630000	778000	750000
pme1210	150	72.8	1.15	149.051	[M+H]+	C00073	L-Methionine	Amino acids	199000	432000	425000	439000	84900	47800	145000	676000	839000	854000	332000	681000	639000
pme1218	124	77.8	1.15	123.032	[M+H]+	C10164	2-Picolinic acid	Organic acids	209000	229000	232000	222000	271000	9	367000	455000	151000	207000	786000	464000	309000
pme1225	219.1	144.1	1.66	220.085	[M-H]-	C00643	5-Hydroxy-L-tryptophan	Amino acid derivatives	29700	29100	30900	32400	1860	304	2300	24900	34800	19400	165000	57700	54100
pme1239	320.4	128.1	1.27	321.1	[M-H]-	C11347	S-(methyl)glutathione	Amino acid derivatives	13100	9240	13000	10400	9	3520	9	29700	24600	20400	13300	6620	9
pme1283	383	134	1.36	384.122	[M-H]-	C00021	S-(5'-Adenosy)-L-homocysteine	Amino acid derivatives	606000	787000	653000	694000	142000	167000	271000	765000	1190000	1120000	741000	1540000	1840000
pme1292	167.1	122.1	2.12	168.042	[M-H]-	C00544	Homogentisic acid	Organic acids	403000	434000	483000	521000	539000	646000	760000	430000	268000	338000	496000	272000	316000
pme1294	283	151.1	1.75	284.076	[M-H]-	C01762	Xanthosine	Nucleotide and its derivates	2390000	2690000	2430000	2390000	617000	259000	1780000	4420000	3480000	3510000	3180000	4230000	4500000
pme1310	235.1	130.1	1.98	236.08	[M-H]-	C02700	N'-Formylkynurenine	Amino acid derivatives	14300	16800	17700	14100	3460	5690	7240	18700	16100	25800	34300	46100	41800
pme1346	300.1	168.1	1.59	299.087	[M+H]+	-	8-Hydroxyguanosine	Nucleotide and its derivates	1120000	1260000	1190000	1180000	416000	311000	436000	1560000	2230000	1310000	3730000	1790000	1610000
pme1368	128	126	1.16	129.079	[M-H]-	C00408	L-Pipecolic acid	Amino acid derivatives	221000	231000	249000	308000	11000	12300	38800	231000	270000	275000	196000	98000	181000
pme1377	280.1	148.1	2.27	281.112	[M-H]-	C02494	1-Methyladenosine	Nucleotide and its derivates	38700	32400	32000	34900	13200	16700	16100	46400	39500	54700	56000	21300	25800
pme1383	170.1	134.1	1.16	169.074	[M+H]+	C00314	Pyridoxine	Vitamins	3450000	8000000	7940000	8240000	15300000	10700000	14000000	2430000	5030000	6850000	3030000	3940000	4510000
pme1397	271	215.1	3.85	271.24	Protonated	C05904	Pelargonidin	Anthocyanins	90300	148000	177000	148000	469000	103000	287000	173000	105000	112000	115000	18800	15600
pme1398	465.1	303.1	2.26	465.1	Protonated	C12138	Delphinidin 3-O-glucoside (Mirtillin)	Anthocyanins	9750000	11900000	10500000	11400000	13700000	20600000	16600000	4030000	7430000	9060000	4620000	5440000	7500000
pme1399	355.2	178.9	8.4	354.147	[M+H]+	C16417	Xanthohumol	Flavanone	13300	15300	16800	18100	15100	12800	19000	6410	14800	25400	7730	16000	11800
pme1408	145.1	127.1	0.76	146.069	[M-H]-	C00064	L-Glutamine	Amino acids	602000	713000	784000	758000	49700	75700	98300	1100000	659000	981000	848000	947000	915000
pme1417	161.1	144.2	2.74	160.1	[M+H]+	C00398	L-Tryptamine	Tryptamine derivatives	2170000	7610000	7470000	8070000	6530000	130000	10900000	74300000	4120000	2500000	1610000	456000	200000
pme1419	164	61	1.77	163	[M+H]+	-	L-Methionine methyl ester	Amino acid derivatives	38400	75700	64100	68900	9	9	49900	147000	85400	95000	218000	152000	109000
pme1423	151.1	105	5.4	150.068	[M+H]+	C05629	Hydrocinnamic acid	Hydroxycinnamoyl derivatives	27500	55600	60300	54800	30800	9	27300	84900	72100	35000	98800	27000	8120
pme1424	177.1	177.1	4.64	178.063	[M-H]-	C02666	Coniferylaldehyde	Hydroxycinnamoyl derivatives	2140000	1920000	2050000	1950000	1760000	2250000	1640000	2500000	1940000	1350000	2960000	1770000	1540000
pme1434	371.1	209.2	2.58	372.142	[M-H]-	C01533	Syringin	Hydroxycinnamoyl derivatives	92900	95800	87600	79000	147000	72900	135000	74700	29500	76600	5740	34300	9
pme1436	163	119	3.86	164.047	[M-H]-	C00811	p-Coumaric acid	Hydroxycinnamoyl derivatives	856000	667000	744000	745000	1420000	29100	324000	184000	152000	549000	546000	325000	233000
pme1473	296	134	2.9	297.09	[M-H]-	C00170	5'-Deoxy-5'-(methylthio)adenosine	Nucleotide and its derivates	59800	37600	48800	68500	818	133000	20700	146000	81100	72100	101000	87900	82700
pme1478	317	179	4.7	318.038	[M-H]-	C10107	Myricetin	Flavonol	148000	165000	175000	171000	601000	57500	110000	24300	9	9480	9	9	9
pme1500	313.1	283.1	7.23	314.079	[M-H]-	-	Kumatakenin	Flavonol	388000	384000	373000	378000	38400	2620000	427000	7340	4610	3650	447000	160000	93400
pme1510	269.1	251.1	5.94	270.053	[M-H]-	C10023	Baicalein (5,6,7-Trihydroxyflavone)	Flavone	744000	767000	767000	771000	412000	988000	832000	156000	149000	483000	369000	362000	313000
pme1514	305	125	2.76	306	[M-H]-	C12136	Epigallocatechin (EGC)	Catechin derivatives	90100	103000	93700	82900	167000	150000	199000	9	9	609	9	9	9
pme1518	403.1	373.1	7.06	402.132	[M+H]+	C10112	Nobiletin	Flavone	269000	317000	335000	321000	199000	489000	382000	520000	139000	182000	370000	424000	200000
pme1521	303.1	125.1	4.15	304.058	[M-H]-	C01617	Dihydroquercetin (Taxifolin)	Flavonol	847000	837000	861000	897000	611000	433000	448000	1320000	884000	331000	2010000	365000	335000
pme1535	305	125	2.28	306.074	[M-H]-	C12127	(+)-Gallocatechin (GC)	Catechin derivatives	18900000	21700000	20300000	19800000	54700000	21300000	54200000	860000	535000	343000	1220000	351000	276000
pme1544	285.1	284.9	7.06	284.069	[M+H]+	C01470	Acacetin	Flavone	44000	48400	48600	50700	81900	54600	60200	80300	72500	26200	32100	17700	13500
pme1550	373.1	373.1	7.54	372.121	[M+H]+	C10190	Tangeretin	Flavone	101000	135000	131000	139000	99600	248000	197000	133000	38500	58600	92000	112000	46700
pme1551	463.1	300	3.63	464.096	[M-H]-	C10108	Myricetin 3-O-rhamnoside (Myricitrin)	Flavonol	91500	117000	126000	136000	620000	286000	338000	9	9	9	56400	119000	134000
pme1562	441.3	289.1	3.89	442.3	[M-H]-	-	Epicatechin gallate (ECG)	Catechin derivatives	13100	12400	11000	6900	55400	15400	29400	9	9	9	7110	4310	6650
pme1568	285	257.1	5.08	286.048	[M-H]-	C10510	Orobol (5,7,3',4'-tetrahydroxyisoflavone)	Isoflavone	95800	89900	90100	94200	79700	47900	77100	69400	108000	49300	87500	199000	198000
pme1580	287.1	135.1	5.05	288.063	[M-H]-	C05631	Eriodictyol	Flavanone	3320000	3040000	3020000	3130000	4320000	864000	2670000	1220000	1790000	969000	3340000	2730000	4160000
pme1588	315.1	300.1	5.85	316.058	[M-H]-	C10084	Isorhamnetin	Flavonol	136000	125000	131000	132000	17100	9140	105000	4700	9790	2800	1740000	489000	125000
pme1598	463.1	301.1	3.85	464.132	[M-H]-	-	Hesperetin 5-O-glucoside	Flavanone	4100000	4480000	4670000	4910000	5760000	999000	1730000	3210000	3290000	2280000	7470000	7100000	7970000
pme1599	301.1	135.1	6.28	302.079	[M-H]-	-	7-O-Methyleriodictyol	Flavanone	3600000	3230000	3240000	3140000	5320000	1390000	2370000	462000	535000	397000	13400000	8890000	6810000
pme1601	417.1	270.9	4.9	416.111	[M+H]+	-	Apigenin 4-O-rhamnoside	Flavone	487000	755000	808000	824000	194000	296000	350000	1230000	1440000	974000	458000	141000	90400
pme1605	593.2	285.1	3.76	594.159	[M-H]-	-	Kaempferol 3-O-robinobioside (Biorobin)	Flavonol	1550000	1540000	1460000	1430000	247000	1010000	204000	8960000	1900000	785000	4170000	1710000	808000
pme1611	433.1	433	3.75	434.121	[M-H]-	-	Isohemiphloin	Alkaloids	5940000	5370000	5600000	5610000	12200000	2400000	4050000	7120000	2620000	2800000	5990000	2780000	2050000
pme1637	179.1	146.1	3.88	180.079	[M-H]-	C00590	Coniferyl alcohol	Hydroxycinnamoyl derivatives	246000	232000	255000	256000	567000	504000	434000	143000	55200	132000	165000	71000	54800
pme1640	371.1	267.1	11.9	370.105	[M+H]+	-	sesamolin	Others	2610000	2170000	3930000	3950000	9	9	9	990000	9	9	1150000	934000	722000
pme1646	357.1	136.1	5.41	358.142	[M-H]-	-	Pinoresinol	Hydroxycinnamoyl derivatives	1070000	927000	938000	899000	585000	532000	649000	2440000	978000	964000	2090000	1020000	850000
pme1662	287.1	287.1	6.96	286.084	[M+H]+	C09833	sakuranetin	Flavone	1820000	2300000	2240000	2260000	1120000	652000	917000	394000	435000	484000	10000000	7390000	5200000
pme1665	593.2	431.1	3.36	594.159	[M-H]-	C08064	Isovitexin 7-O-glucoside (Saponarin)	Others	17100	19500	24800	22100	9	12500	9340	78600	21800	23900	38200	22300	25100
pme1682	99.1	79	5.68	98.073	[M+H]+	C08497	trans-2-Hexenal	Others	749000	1070000	785000	1490000	597000	1390000	448000	10200000	873000	3050000	3470000	929000	659000
pme1683	477.2	258.1	2.15	476.168	[M+H]+	C12276	D-Pantothenic dcid	Organic acids	17500	10500	9910	24200	5840	9	9	38900	34300	18700	23900	37100	42800
pme1691	147.1	88	0.85	146.118	[M+H]+	C08201	Acetylcholine	Cholines	1010000	1420000	1490000	1540000	3020000	3120000	2380000	2250000	1620000	1580000	1040000	1130000	1160000
pme1692	347	78.8	1.16	348.047	[M-H]-	C00130	Inosine 5'-monophosphate	Nucleotide and its derivates	12200	12500	11300	13300	17200	10800	22500	4370	10300	13700	14100	19600	28700
pme1695	223.1	149.1	4.06	224.069	[M-H]-	C00482	Sinapic acid	Hydroxycinnamoyl derivatives	102000	119000	122000	137000	211000	649000	510000	64100	5930	53600	26600	10200	9590
pme1709	138.1	78	3.73	137.048	[M+H]+	-	Nicotinic Acid Methyl Ester (Methyl Nicotinate)	Vitamins	56500	150000	148000	169000	504000	52900	167000	33100	63300	137000	52400	34000	29800
pme1711	117.1	99.9	2.03	118.063	[M-H]-	-	3-Hydroxy-3-methyl butyric acid	Organic acids	1230000	1200000	1160000	1150000	464000	356000	967000	1320000	2420000	1510000	1430000	1390000	1050000
pme1712	275	257.1	0.79	276.132	[M-H]-	C00449	L-Saccharopine	Amino acid derivatives	108000	148000	150000	139000	96000	64500	101000	212000	300000	207000	127000	226000	201000
pme1730	117	99.8	0.74	118.027	[M-H]-	-	D-Erythronolactone	Organic acids	343000	479000	507000	481000	609000	1080000	1080000	793000	690000	484000	757000	381000	179000
pme1777	611	287.7	2.08	611	Protonated	C08639	Cyanidin 3,5-O-diglucoside (Cyanin)	Anthocyanins	5210000	7580000	6620000	6790000	36700000	5070000	27000000	9	9	9	2160000	149000	9
pme1793	595	271.8	2.38	595	Protonated	C08725	Pelargonin	Anthocyanins	900000	1350000	1230000	1260000	7180000	823000	4060000	9	9	9	9	9	9
pme1806	367	179.1	3.64	368.111	[M-H]-	-	Chlorogenic acid methyl ester	Quinate and its derivatives	475000	338000	365000	383000	53600	34500	86800	468000	263000	279000	638000	804000	621000
pme1814	153	108.1	2.5	154.027	[M-H]-	C00628	2,5-dihydroxybenzoic acid (Gentisic acid)	Benzoic acid derivatives	2490000	2720000	2760000	2720000	1810000	3000000	5520000	4450000	2110000	4260000	2780000	2320000	2040000
pme1816	353	191.1	2.35	354.095	[M-H]-	C17147	Neochlorogenic acid (5-O-Caffeoylquinic acid)	Quinate and its derivatives	15400000	14900000	13900000	14800000	11200000	11300000	13900000	12200000	20000000	13600000	23400000	19800000	18600000
pme1820	151	107.1	3.21	152.047	[M-H]-	C00642	p–Hydroxyphenyl acetic acid	Organic acids	58200	35700	45800	39800	20400	32900	37700	50100	43800	63100	73500	45200	62700
pme1824	153.1	109.1	2.48	154.027	[M-H]-	C00230	Protocatechuic acid	Catechin derivatives	4870000	5310000	5230000	5400000	3320000	4490000	8810000	6550000	4340000	7330000	5080000	4640000	4410000
pme1828	118.1	118.1	0.79	117.079	[M+H]+	C00719	Betaine	Alkaloids	3070000	5620000	4400000	4100000	5630000	7060000	9250000	5580000	3990000	4770000	6850000	4490000	9
pme1830	117	99.9	1.35	118.027	[M-H]-	C00042	Succinic acid	Organic acids	5770000	4700000	6450000	6920000	5320000	4130000	6660000	5580000	5930000	8250000	4410000	3940000	2900000
pme1841	103	86.1	0.76	102.116	[M+H]+	C01672	1,5-Diaminopentane	Phenolamides	50600	67700	60400	65200	144000	251000	157000	64500	45300	79800	28400	34900	66700
pme1846	179	70.9	0.77	180.063	[M-H]-	C00031	D(+)-Glucose	Carbohydrates	3570000	4210000	4340000	4980000	4220000	5980000	6080000	7790000	5710000	4770000	4730000	2580000	2260000
pme1851	130.1	88	0.81	131.07	[M-H]-	C00300	Creatine	Organic acids	946000	726000	996000	851000	537000	193000	638000	933000	973000	1060000	666000	424000	192000
pme1936	114.1	114	0.62	113.059	[M+H]+	C00791	Creatinine	Organic acids	156000	212000	175000	145000	192000	59400	92300	124000	19200	79500	216000	130000	129000
pme1944	183.1	111	0.8	182.079	[M+H]+	C00392	D-Mannitol	Alcohols and polyols	38900	68000	76600	79400	206000	247000	165000	89400	122000	81700	80100	111000	98500
pme1949	375	255.2	3.26	376.138	[M-H]-	C00255	Riboflavin	Vitamins	179000	161000	167000	163000	30900	173000	87700	375000	258000	348000	123000	395000	426000
pme1966	126	126	0.83	125.015	[M+H]+	C00245	2-Aminoethanesulfonic acid	Organic acids	172000	242000	235000	244000	238000	240000	318000	9	9	451000	254000	9	9
pme1977	173.1	83	3.87	174.089	[M-H]-	C08278	Suberic acid	Organic acids	88700	89800	84500	76200	54500	74100	71000	194000	158000	137000	146000	58500	55400
pme1988	90	71.8	0.78	89.048	[M+H]+	C00041	L-Alanine	Amino acids	1660000	2110000	2070000	1910000	3310000	3080000	3220000	2130000	3550000	3080000	1560000	696000	334000
pme2019	149	58.9	0.81	150.053	[M-H]-	-	DL-Arabinose	Carbohydrates	872000	846000	1060000	865000	1110000	1450000	1450000	1050000	1020000	835000	952000	444000	772000
pme2024	177	160.2	1.63	176.095	[M+H]+	C00780	serotonin	Tryptamine derivatives	4350000	14600000	10900000	11500000	40000000	4860000	23500000	214000000	17800000	22400000	16200000	7280000	5840000
pme2033	133	70.8	0.85	134.022	[M-H]-	C00497	L(-)-Malic acid	Organic acids	7540000	9000000	10200000	9780000	16700000	13500000	14900000	6390000	5560000	11000000	5020000	5950000	5070000
pme2036	191	85	0.92	192.063	[M-H]-	C00296	Quinic acid	Quinate and its derivatives	3930000	4190000	3700000	3630000	3500000	3420000	3890000	5020000	3880000	4110000	4170000	2170000	1690000
pme2049	103	56.8	1.56	104.047	[M-H]-	C05984	2-Hydroxybutanoic acid	Organic acids	981000	971000	1100000	1060000	299000	127000	412000	909000	469000	830000	1630000	1990000	406000
pme2050	191	131	0.86	192.027	[M-H]-	C00158	Citric acid	Organic acids	48100000	54900000	55200000	56000000	38000000	27500000	34800000	71400000	55400000	51300000	65000000	36000000	31100000
pme2108	163	103	0.68	162.113	[M+H]+	C00318	L-Carnitine	Others	143000	232000	224000	238000	352000	314000	330000	348000	344000	360000	322000	289000	266000
pme2111	175	87	0.85	176.12	[M-H]-	C00072	L-ascorbate	Vitamins	1410000	1600000	1500000	1630000	1890000	1940000	3050000	894000	1300000	1540000	1140000	1050000	1270000
pme2122	112.1	94.6	0.84	111.08	[M+H]+	C00388	Histamine	Amino acid derivatives	1340000	2090000	2260000	2020000	1000000	1040000	1610000	4250000	2630000	2150000	2860000	2180000	1710000
pme2129	131.1	68.9	3.58	132.079	[M-H]-	-	(S)-(-)-2-Hydroxyisocaproic acid	Organic acids	496000	461000	486000	496000	249000	191000	1230000	324000	423000	543000	227000	268000	272000
pme2136	123.1	123	0.81	122.058	[M+H]+	-	DL-threitol	Alcohols and polyols	73800	49100	66600	80800	69000	136000	139000	114000	219000	133000	70300	100000	108000
pme2142	173.1	83.9	1.17	174.1	[M-H]-	C01047	L-Theanine	Amino acids	75900	81100	77800	72000	29100	9600	33200	42400	28700	77700	24800	67500	109000
pme2165	155	111	1.15	156.017	[M-H]-	C00295	Orotic acid	Vitamins	921000	1250000	1360000	1210000	1330000	711000	911000	1230000	872000	899000	1290000	869000	834000
pme2184	515.2	411.2	7.08	514.22	[M+H]+	C08773	Nomilin	Terpenoids	55500	53200	60500	61700	65100	65200	89400	29000	33400	32400	30300	25200	21300
pme2237	181.1	70.8	0.76	182.079	[M-H]-	C01697	Dulcitol	Alcohols and polyols	246000	265000	274000	242000	371000	562000	458000	366000	309000	314000	364000	180000	153000
pme2244	190.1	130.1	5.24	189.079	[M+H]+	-	3-Indolepropionic acid	Indole derivatives	43500	60500	56700	53800	51700	45200	19400	9	34400	9	8170	9	9
pme2246	301	58.8	3.89	302.006	[M-H]-	C10788	Ellagic acid	Others	588000	673000	590000	549000	396000	291000	392000	361000	786000	516000	773000	868000	1010000
pme2253	177.1	74.8	0.79	178.048	[M-H]-	C01040	L-Gulonic-γ-lactone	Carbohydrates	2110000	1800000	2410000	2500000	2420000	3150000	3110000	1990000	2120000	1890000	2280000	1470000	1210000
pme2256	151.1	70.8	0.77	152.069	[M-H]-	C01904	D-Arabitol	Alcohols and polyols	39400	53300	69100	57900	59700	42900	93100	57600	58200	90100	35800	70700	62100
pme2263	243.1	166.1	3.38	244.088	[M-H]-	C00120	Biotin	Vitamins	27300	26400	26100	27200	7720	5010	17900	56300	28000	24200	46600	34200	16700
pme2268	138	137.9	0.79	137.048	[M+H]+	C01004	Trigonelline	Alkaloids	13500000	22600000	18500000	19600000	23000000	33800000	51700000	3570000	10800000	18800000	14200000	15600000	12100000
pme2278	362	78.9	1.17	363.058	[M-H]-	-	Guanosine monophosphate	Nucleotide and its derivates	389000	449000	476000	473000	22800	19700	36700	55900	150000	103000	206000	2510000	5620000
pme2289	287.2	143.4	11	286.23	[M+H]+	C00473	Vitamin A	Vitamins	39600	43700	71300	59500	34400	65600	92000	9630	36800	46800	32500	45600	39100
pme2292	89	71.9	0.64	88.1	[M+H]+	C00134	Putrescine	Phenolamides	149000	191000	163000	152000	63400	65300	205000	387000	247000	270000	299000	9	15000
pme2296	369.1	177.1	7.38	368.126	[M+H]+	C10443	Curcumin	Others	15500	15900	25100	31600	48800	57300	49500	9	9	9	9	11200	9
pme2319	301.1	242.1	5.75	302.079	[M-H]-	C01709	Hesperetin	Flavanone	36400	40500	38800	34900	18200	9990	21600	18300	18200	22100	63100	81900	127000
pme2366	122.1	105	2.26	121.089	[M+H]+	C05332	Phenethylamine	Others	32700000	55400000	55200000	59000000	14700000	2300000	51200000	148000000	27800000	16000000	260000000	130000000	47000000
pme2380	145	80.8	1.14	146.022	[M-H]-	-	A-Ketoglutaric acid	Organic acids	899000	751000	800000	638000	408000	432000	531000	2870000	401000	1490000	4570000	968000	1070000
pme2427	222.1	163	2.61	223.085	[M-H]-	-	N-Acetyl-L-tyrosine	Amino acid derivatives	111000	118000	115000	120000	15600	18600	19200	219000	92200	151000	395000	263000	306000
pme2433	106	88.1	0.79	105.079	[M+H]+	C06772	Diethanolamine	Others	94800	135000	142000	132000	93700	42900	93300	9	248000	163000	139000	9	9
pme2435	163	70.8	0.76	164.069	[M-H]-	C01019	L-Fucose	Carbohydrates	582000	723000	921000	948000	1390000	1020000	761000	346000	473000	483000	330000	279000	194000
pme2459	449.1	287.1	3.87	448.101	[M+H]+	C03951	Luteolin 7-O-glucoside (Cynaroside)	Flavone	112000000	113000000	148000000	114000000	27600000	24300000	45500000	92700000	178000000	155000000	187000000	111000000	129000000
pme2478	137.1	137	3.06	138.032	[M-H]-	C16700	Protocatechuic aldehyde	Catechin derivatives	1010000	1060000	1130000	1110000	531000	604000	646000	1110000	1320000	1100000	1490000	1180000	1070000
pme2491	577.5	431	3.74	578.164	[M-H]-	C16981	Kaempferol 3,7-dirhamnoside (Kaempferitrin)	Flavonol	24900	22400	26300	25600	69800	18600	41400	9	9	9	12200	9	9
pme2527	133	70	0.78	132.16	[M+H]+	C00077	L(+)-Ornithine	Amino acids	240000	358000	420000	395000	9	34300	92200	212000	141000	372000	357000	505000	9
pme2541	103	56.8	1.56	104.047	[M-H]-	-	α-Hydroxyisobutyric acid	Organic acids	244000	226000	265000	239000	78200	41300	85800	205000	237000	185000	366000	474000	135000
pme2550	173	137	0.77	174.016	[M-H]-	C00417	Cis-Aconitic acid	Organic acids	194000	189000	201000	171000	190000	75600	383000	87600	343000	349000	148000	328000	255000
pme2559	174	88	1.27	175.048	[M-H]-	C01042	N-Acetylaspartate	Amino acid derivatives	43500	23100	58800	43100	18400	38800	47600	99300	53800	65700	47500	35200	32100
pme2566	217	88	1.16	218.09	[M-H]-	C03740	(5-L-Glutamyl)-L-amino acid	Amino acid derivatives	155000	141000	197000	196000	410000	738000	349000	52400	57000	78300	174000	77700	84200
pme2594	182.1	138.1	1.66	183.053	[M-H]-	C00847	4-Pyridoxic acid	Pyridine derivatives	1270000	1150000	1210000	1250000	2150000	2220000	1840000	384000	483000	564000	407000	510000	612000
pme2598	167.1	139	2.44	168.042	[M-H]-	-	3,4-Dihydroxybenzeneacetic acid	Organic acids	277000	287000	310000	289000	366000	255000	206000	240000	311000	268000	307000	386000	334000
pme2601	89	68.9	1.19	90.032	[M-H]-	C01013	3-Hydroxypropanoic acid	Organic acids	159000	157000	191000	171000	260000	376000	227000	148000	110000	134000	140000	56600	40300
pme2603	152	108.1	2.66	153.043	[M-H]-	C00632	3-Hydroxyanthranilic acid	Organic acids	104000	117000	105000	88300	103000	164000	157000	214000	77900	198000	72900	78300	74500
pme2607	192.1	114.9	3.17	191.058	[M+H]+	C05635	5-Hydroxyindole-3-acetic acid	Indole derivatives	80700	182000	185000	215000	113000	204000	151000	95200	136000	182000	147000	121000	97900
pme2617	166	149.1	0.76	165.046	[M+H]+	-	Methionine sulfoxide	Amino acid derivatives	473000	972000	856000	905000	1060000	700000	668000	784000	574000	659000	1070000	853000	830000
pme2634	118	88	0.85	117.079	[M+H]+	C01826	Dl-Norvaline	Amino acids	19100000	34100000	31800000	31900000	23500000	16100000	24600000	51900000	45000000	44700000	40900000	40900000	38400000
pme2636	301.2	253.2	4.66	302.152	[M-H]-	C18166	Enterodiol	Alcohols and polyols	42700	24200	37600	38200	34800	38400	30100	32100	17200	25800	49400	23700	22400
pme2651	742.1	620.2	1.15	743.075	[M-H]-	C00006	NADP	Others	228000	339000	291000	335000	200000	498000	518000	373000	1400000	988000	380000	466000	562000
pme2661	383	281.1	5.46	384.339	[M-H]-	C05443	Vitamin D3	Vitamins	18000	20100	17700	22200	3640	9420	9270	38400	22200	15300	26000	11000	7560
pme2670	121	91.9	3.72	122.037	[M-H]-	C00633	4-Hydroxybenzaldehyde	Benzoic acid derivatives	4510000	4710000	4610000	4540000	2420000	3000000	2570000	6580000	1800000	4480000	6280000	2180000	801000
pme2693	131	71.9	0.8	130.111	[M+H]+	C02714	N-Acetylputrescine	Phenolamides	966000	1770000	1750000	1880000	1310000	1050000	3830000	2960000	2270000	2130000	539000	9	9
pme2702	144.1	102	1.62	145.074	[M-H]-	C02946	4-Acetamidobutyric acid	Organic acids	308000	278000	339000	338000	247000	158000	268000	422000	426000	469000	250000	251000	239000
pme2706	153.2	109	2.42	154.027	[M-H]-	C00196	2,3-Dihydroxybenzoic acid	Organic acids	4760000	5210000	5350000	5520000	3470000	4690000	8610000	6540000	4240000	7300000	5260000	4850000	4820000
pme2709	117.1	99.9	2.3	118.063	[M-H]-	-	2-Hydroxy-2-methyl butyric acid	Organic acids	16000	14800	17500	14100	2190	2680	3540	13100	12800	11000	30300	42900	40100
pme2720	144.1	126.1	4.53	145.053	[M-H]-	C08493	Indole-3-carboxaldehyde	Indole derivatives	50600	61000	66000	54200	692000	19900	26100	178000	68500	73600	122000	77600	43200
pme2735	399.2	250.1	0.77	398.137	[M+H]+	C00019	S-(5'-Adenosyl)-L-methionine	Amino acid derivatives	6290000	6540000	6030000	6000000	2010000	2220000	6650000	15900000	33100000	11900000	12800000	55800000	57400000
pme2740	192.1	50.4	3.66	193.074	[M-H]-	C05598	N-Phenylacetylglycine	Amino acid derivatives	15900	18700	16900	16100	11700	4000	11100	22100	19500	20500	24200	30700	33800
pme2746	784.2	437.2	2.79	785.157	[M-H]-	C00016	Flavin adenine dinucleotide (FAD)	Nucleotide and its derivates	567000	572000	590000	657000	134000	761000	990000	1030000	5030000	2500000	1460000	4640000	4090000
pme2755	222	138.1	0.62	221.09	[M+H]+	C00140	N-Acetyl-D-glucosamine	Carbohydrates	10400000	11000000	10900000	12000000	13300000	15500000	16100000	13400000	17900000	14100000	12400000	13100000	13100000
pme2761	161	160.9	0.95	162.016	[M-H]-	C01127	4-Hydroxy-2-oxoglutaric acid	Organic acids	257000	196000	219000	240000	451000	624000	399000	439000	509000	302000	136000	83400	9
pme2776	253.1	137.1	1.67	252.086	[M+H]+	C05512	2'-Deoxyinosine	Nucleotide and its derivates	531000	768000	729000	859000	109000	126000	252000	1910000	1050000	906000	1680000	1320000	959000
pme2786	219	160.1	3.32	218.106	[M+H]+	C00978	N-Acetyl-5-hydroxytryptamine	Tryptamine derivatives	211000	822000	738000	785000	744000	192000	373000	932000	234000	586000	593000	223000	109000
pme2798	165	150.1	1.85	166.049	[M-H]-	C16353	7-Methylxanthine	Nucleotide and its derivates	52200	61600	69100	59200	76900	124000	48400	60300	39200	38400	59900	35800	45500
pme2819	287.2	173.2	11.1	286.23	[M+H]+	-	All-trans-13,14-dihydroretinol	Vitamins	371000	365000	456000	374000	227000	362000	424000	295000	411000	414000	385000	357000	289000
pme2827	239	223	6.77	240.245	[M-H]-	C00517	Palmitaldehyde	Lipids_Fatty acids	5990000	5960000	6260000	6720000	1420000	1440000	1490000	3920000	2200000	3220000	2310000	1660000	2460000
pme2830	140	78.5	0.75	141.019	[M-H]-	-	O-Phosphorylethanolamine	Others	104000	106000	124000	111000	31400	35000	50300	108000	116000	77200	238000	283000	210000
pme2836	178.1	160.1	2.95	177.079	[M+H]+	-	5-Hydroxytryptophol	Indole derivatives	327000	762000	811000	849000	338000	425000	396000	2290000	2080000	1420000	1030000	417000	335000
pme2884	166	124.1	0.85	167.037	[M-H]-	-	Guanidinoethyl sulfonate	Organic acids	30500	37700	30800	39300	58000	47600	45400	26600	28900	59000	25600	26700	27500
pme2890	269	134	0.85	268.055	[M+H]+	C01817	L-Homocystine	Amino acids	68400	85700	99900	94400	28500	28600	16600	197000	123000	91400	121000	172000	130000
pme2895	319.1	193	3.52	320.053	[M-H]-	C02906	Dihydromyricetin	Flavonol	35600	43300	42800	46100	78300	30200	125000	41300	26700	25100	9	9	17200
pme2901	353.1	191.1	2.38	354.095	[M-H]-	-	1-O-Caffeoyl quinic acid	Quinate and its derivatives	15600000	15400000	14600000	14800000	11400000	11400000	13500000	12800000	20200000	13100000	23000000	19700000	20000000
pme2903	137	92.5	3.1	138.032	[M-H]-	C00156	4-Hydroxybenzoic acid	Organic acids	15300000	15600000	15800000	13500000	9860000	7980000	19700000	18300000	12000000	16600000	14500000	7470000	6550000
pme2950	611.2	303	4.08	610.19	[M+H]+	C09755	Hesperetin 7-rutinoside (Hesperidin)	Flavanone	381000	378000	494000	497000	643000	891000	568000	9	9	9	9	9	9
pme2957	271.1	151.1	5.57	272.069	[M-H]-	C06561	Naringenin chalcone	Flavanone	15100000	14700000	14800000	15200000	8820000	2160000	9460000	9110000	9680000	7490000	16400000	23100000	30900000
pme2963	287.1	125.1	4.62	288.063	[M-H]-	C00974	Aromadedrin (Dihydrokaempferol)	Flavonol	6920000	6600000	6560000	6580000	6640000	3870000	6420000	7390000	5060000	3230000	7600000	6390000	6700000
pme2973	675.2	513.2	4.98	676.237	[M-H]-	C17555	Icariin (kaempferol 3,7-O-diglucoside 8-prenyl derivative)	Flavonol	2070000	1560000	1480000	1560000	1880000	3220000	2940000	138000	618000	978000	153000	337000	385000
pme2977	347.3	285.4	6.66	346.251	[M+H]+	-	Troxerutin (Trihydroxyethyl rutin)	Flavonol	14300	22700	23500	22400	3990	205000	38600	4720	10200	1560	21700	1450	1850
pme2979	255.1	151.1	7.04	256.074	[M-H]-	C09827	Pinocembrin (Dihydrochrysin)	Flavanone	267000	252000	236000	237000	153000	53200	183000	202000	96300	67200	631000	387000	324000
pme2984	593	285.2	5.09	594.195	[M-H]-	C09830	Isosakuranetin-7-neohesperidoside (Poncirin)	Flavanone	125000	118000	116000	117000	90600	12400	30800	1630	14800	9830	48600	257000	421000
pme2988	149.2	107	5.63	148.052	[M+H]+	C02274	3,4-Dihydrocoumarin	Coumarins	81700	149000	174000	160000	9	52300	9	387000	224000	9	159000	189000	189000
pme2996	161	117	4.46	162.032	[M-H]-	C20414	4-Hydroxycoumarin	Coumarins	405000	421000	373000	364000	671000	349000	404000	270000	123000	258000	285000	106000	87500
pme3007	403	159	0.7	404.161	[M-H]-	C00015	Uridine 5’-diphosphate	Nucleotide and its derivates	70800	116000	132000	121000	40200	47100	75800	90200	250000	171000	156000	441000	573000
pme3011	104.1	87	0.77	103.063	[M+H]+	C00334	γ-aminobutyric acid	Organic acids	6820000	8840000	9520000	9790000	1420000	2010000	1900000	10500000	8960000	9090000	9190000	12200000	8440000
pme3017	104	85.9	0.76	103.063	[M+H]+	C03665	2-Aminoisobutyric acid	Amino acid derivatives	2770000	4000000	3560000	3710000	2660000	2310000	3660000	6620000	6000000	5180000	5720000	2360000	1900000
pme3033	104	58	0.76	103.063	[M+H]+	C01026	N,N-Dimethylglycine	Amino acid derivatives	5200000	7280000	7430000	7780000	2540000	2680000	2860000	9660000	8480000	7990000	8140000	8410000	5910000
pme3034	131	86.9	1.94	132.042	[M-H]-	-	ethylmalonate	Organic acids	58800	71900	83200	82500	30500	10300	66000	86000	117000	122000	59600	75400	54800
pme3038	130	83.9	0.85	129.043	[M+H]+	C01879	5-oxoproline	Amino acid derivatives	8010000	14200000	11600000	11900000	394000	104000	3080000	18600000	17600000	14200000	10100000	8420000	6360000
pme3069	556.3	371.2	10.27	555.284	[M+H]+	C05122	Taurocholic acid	Organic acids	5010000	6300000	6670000	6560000	8080000	8090000	7990000	5310000	4930000	6430000	6410000	6660000	7230000
pme3081	169.1	134.1	0.77	168.09	[M+H]+	C00534	4-(Aminomethyl)-5-(hydroxymethyl)-2-methylpyridin-3-ol	Others	26900	49100	68600	65700	53600	29100	78200	30700	48300	79800	46000	110000	144000
pme3083	164	92	3.87	165.043	[M-H]-	-	2-(Formylamino)benzoic acid	Organic acids	4010000	3720000	3560000	3620000	7490000	212000	1950000	896000	947000	2970000	2840000	1650000	1250000
pme3096	118	73.9	1.34	119.022	[M-H]-	C00872	Aminomalonic acid	Organic acids	4830000	6100000	5970000	6330000	4800000	2740000	6280000	5040000	6290000	6910000	4920000	6460000	5470000
pme3104	150	133.1	1.15	149.07	[M+H]+	C02216	1-Methyladenine	Nucleotide and its derivates	32000	89800	82000	94100	75600	152000	84800	79200	118000	79200	52500	75500	61900
pme3123	209	179.1	3.88	210.089	[M-H]-	C02325	Sinapyl alcohol	Hydroxycinnamoyl derivatives	35800	33900	40700	38400	100000	115000	93900	14500	9	10400	6330	6340	5460
pme3129	463	301	3.86	464.096	[M-H]-	-	Quercetin 4'-O-glucoside (Spiraeoside)	Flavonol	3510000	3770000	3780000	3950000	4270000	817000	1350000	2890000	2640000	1820000	6280000	5710000	6270000
pme3134	237	181.1	7.73	238.063	[M-H]-	C20871	3-Hydroxyflavone	Flavonol	5740	6110	6560	6930	7570	25800	10500	2240	9	8420	9	9	9
pme3140	175	131.1	4.11	176.047	[M-H]-	-	6-Hydroxy-4-methylcoumarin	Coumarins	3640000	3670000	3510000	3550000	664000	1540000	1850000	6010000	5940000	6700000	1990000	2050000	1730000
pme3146	145.1	102	1.25	146.069	[M-H]-	-	Ureidoisobutyric acid	Organic acids	25400	37700	39000	34100	17600	8170	10000	13000	13100	33100	11900	46700	49100
pme3148	400.3	341.4	8.48	399.335	[M+H]+	C02990	L-Palmitoylcarnitine	Others	23200	35700	34900	35100	39800	40000	20000	57500	50400	49400	25500	16600	13600
pme3151	213	78.9	1.2	214.016	[M-H]-	-	Deoxyribose 5-phosphate	Nucleotide and its derivates	69600	46300	81500	78700	125000	149000	357000	83400	71400	79800	9	9	9
pme3160	259	96.9	0.71	260.03	[M-H]-	C00092	D-Glucose 6-phosphate	Carbohydrates	6860000	8890000	9610000	9460000	2520000	3580000	3730000	15400000	15300000	16000000	17000000	11200000	7940000
pme3163	289	78.9	1.07	290.04	[M-H]-	-	D-Sedoheptuiose 7-phosphate	Carbohydrates	6400000	8000000	7820000	6570000	14000000	16300000	14600000	13100000	13700000	12200000	3440000	1210000	1220000
pme3174	324	112	0.83	323.052	[M+H]+	C00055	Cytidine 5'-monophosphate (Cytidylic acid)	Nucleotide and its derivates	245000	319000	298000	315000	188000	180000	202000	297000	338000	301000	720000	611000	350000
pme3184	332	136.1	1.17	331.068	[M+H]+	C00360	2'-Deoxyadenosine-5'-monophosphate	Nucleotide and its derivates	1560000	2480000	2560000	2560000	5650000	4540000	6130000	1090000	1160000	1550000	1080000	907000	920000
pme3188	323	78.8	1.18	324.036	[M-H]-	C00105	Uridine 5'-monophosphate	Nucleotide and its derivates	1310000	1550000	1560000	1550000	96700	121000	229000	660000	546000	447000	1280000	4430000	6130000
pme3194	118	76	1.02	117.043	[M+H]+	-	N-acetylglycine	Amino acid derivatives	4440000	6230000	7030000	6210000	7570000	11300000	11500000	10000000	6710000	6830000	7460000	9	9
pme3200	74	56.9	0.71	73.0971	[M+H]+	-	1-methylguanidine	Nucleotide and its derivates	45900	91900	92400	77900	78200	92800	62700	99300	159000	104000	98200	78500	46300
pme3207	141	58.7	0.69	142.027	[M-H]-	-	trans,trans-Muconic acid	Organic acids	61000	63700	75100	66600	104000	53900	11600	102000	13500	23800	48300	3920	6220
pme3210	433	270.9	4.01	432.106	[M+H]+	C09126	Genistein 7-O-Glucoside (Genistin)	Isoflavone	686000	1110000	1040000	1210000	2000000	1490000	1030000	1190000	1070000	557000	812000	615000	929000
pme3211	463	301.1	3.86	464.096	[M-H]-	C05623	Quercetin 3-O-glucoside (Isotrifoliin)	Flavonol	3440000	3740000	3790000	3970000	4230000	802000	1420000	2670000	2650000	1980000	6250000	5670000	6420000
pme3227	579	433.1	3.68	578.164	[M+H]+	C12628	Vitexin 2''-O-beta-L-rhamnoside	Flavone C-glycosides	170000	316000	292000	321000	918000	222000	473000	9	9	9	111000	9	9
pme3230	283	268.2	5	284.069	[M-H]-	C01562	Calycosin	Isoflavone	15800	15400	9160	13300	9	13500	9	9	9	13600	9	18800	19100
pme3245	271	137.1	6.82	270.089	[M+H]+	C10503	Medicarpin	Hydroxycinnamoyl derivatives	17900	26100	24700	21200	10300	6230	13900	17200	85500	64900	15300	3550	11100
pme3246	341	179.1	2.72	342.132	[M-H]-	C00761	Coniferin	Hydroxycinnamoyl derivatives	57300000	54500000	55100000	56900000	98700000	1270000	34100000	9	23200000	42400000	9	9	4990000
pme3250	285	270.2	7	284.069	[M+H]+	C00814	Biochanin A	Isoflavone	55500	75000	72200	76300	9290	85600	15600	9	9	9	32400	8520	5730
pme3261	271	215.2	4.48	270.053	[M+H]+	C14314	6-Hydroxydaidzein	Isoflavone	105000	176000	162000	159000	142000	136000	132000	116000	127000	116000	131000	88200	109000
pme3267	447	284	3.86	448.101	[M-H]-	C12626	Kaempferol 3-O-galactoside (Trifolin)	Flavonol	582000	504000	424000	472000	109000	103000	96800	2310000	578000	650000	1410000	292000	465000
pme3276	285	217.1	4.89	286.048	[M-H]-	C12134	2'-Hydroxygenistein	Isoflavone	106000	91400	93200	94800	87300	38000	77900	12000	104000	24000	71800	85800	149000
pme3282	273	97	3.4	274.084	[M-H]-	C09320	Afzelechin (3,5,7,4'-Tetrahydroxyflavan)	Flavanone	117000	104000	124000	116000	56900	9	9	105000	89500	67400	185000	204000	158000
pme3288	329	314	6.63	330.074	[M-H]-	C01265	3,7-Di-O-methylquercetin	Flavonol	404000	372000	354000	348000	1100000	128000	918000	60300	48200	21200	755000	901000	594000
pme3292	283	268.1	6.97	284.069	[M-H]-	C10521	Prunetin	Isoflavone	107000	97300	99700	93300	4980	95800	10500	9	2330	1290	53100	17000	5520
pme3296	431	285.1	4.48	432.106	[M-H]-	C16911	Kaempferol 3-O-rhamnoside (Kaempferin)	Flavonol	943000	836000	833000	790000	1080000	1720000	652000	238000	184000	213000	455000	395000	454000
pme3300	301	149.1	4.51	302.043	[M-H]-	C10192	Tricetin	Flavone	96900	83900	49200	73000	383000	55400	110000	9	9	9	9	9	9
pme3309	145.1	101.1	2.58	146.058	[M-H]-	-	2-Methylglutaric acid	Organic acids	2120000	2100000	2220000	2250000	254000	168000	285000	3210000	4990000	3710000	2430000	4390000	4350000
pme3313	259	78.8	0.83	260.03	[M-H]-	C00085	D-Fructose 6-phosphate	Carbohydrates	3930000	4540000	4560000	3580000	2050000	2870000	2250000	7660000	7330000	7060000	7260000	3360000	2650000
pme3333	153.1	136.1	1.51	152.059	[M+H]+	-	1,4-dihydro-1-Methyl-4-oxo-3-pyridinecarboxamide	Pyridine derivatives	1750000	3180000	2870000	2740000	388000	543000	931000	4960000	3040000	3340000	5020000	5430000	5160000
pme3336	382	134.1	2.06	383.108	[M-H]-	-	N6-Succinyl Adenosine	Nucleotide and its derivates	4100000	4450000	4170000	4510000	1990000	4730000	4420000	6040000	3830000	6030000	3370000	3750000	3500000
pme3346	131.1	70.8	2.76	132.079	[M-H]-	-	5-hydroxyhexanoic acid	Organic acids	451000	479000	488000	494000	305000	202000	216000	293000	438000	748000	272000	748000	958000
pme3349	282	192.1	1.73	283.092	[M-H]-	-	8-Hydroxy-2-deoxyguanosine	Nucleotide and its derivates	43000	47300	46100	44300	6710	6620	11600	67900	60800	45300	63900	71400	76000
pme3351	144.1	126.1	0.84	145.074	[M-H]-	C04076	Allysine(6-Oxo DL-Norleucine)	Amino acid derivatives	173000	206000	194000	191000	247000	204000	315000	148000	191000	184000	162000	177000	161000
pme3367	161	105.1	5.96	160.052	[M+H]+	-	6-MethylCoumarin	Coumarins	155000	235000	234000	225000	80100	66900	157000	91200	275000	184000	144000	130000	126000
pme3369	315	165.1	6.43	316.058	[M-H]-	C10176?	Rhamnetin (7-O-methxyl quercetin)	Flavonol	31600	34300	28800	28900	48400	27500	7780	2490	9	2180	39600	112000	113000
pme3382	160	73.9	1.16	161.069	[M-H]-	-	N-Acetylthreonine	Amino acid derivatives	156000	156000	202000	187000	156000	151000	231000	144000	136000	218000	140000	103000	95800
pme3387	187	145.1	0.84	188.127	[M-H]-	C01924	H-HomoArg-OH	Amino acid derivatives	46200	62100	71600	74500	33700	28000	49400	70000	56500	58000	141000	154000	160000
pme3396	289	215.1	3.65	288.063	[M+H]+	C01378	Fustin	Flavonol	351000	702000	734000	794000	1910000	351000	1020000	437000	456000	297000	490000	217000	261000
pme3400	447.1	285.1	5.16	446.121	[M+H]+	C05376	Sissotrin	Isoflavone	43600	48400	50900	46500	9	246000	9	14800	9	9	9	9030	9
pme3401	345	330.2	5.78	346.069	[M-H]-	C11620	Syringetin	Flavonol	1180000	1180000	1150000	1210000	163000	281000	1120000	742000	628000	233000	6450000	3300000	2550000
pme3410	333	305.2	5.15	332.053	[M+H]+	C12633	Laricitrin	Flavonol	33700	26800	34300	34700	31000	25400	72700	9	9	9	168000	30600	17100
pme3416	177	133.1	3.24	178.027	[M-H]-	C09263	Esculetin (6,7-dihydroxycoumarin)	Coumarins	18200000	16700000	17300000	16600000	13000000	4350000	20300000	10700000	10800000	15000000	9010000	9060000	9710000
pme3422	207.1	192	3.56	208.037	[M-H]-	C09265	6-Methoxy-7,8-DihydroxyCoumarin	Coumarins	88400	77000	81000	82400	45700	59500	179000	119000	124000	80500	55000	64600	88300
pme3428	339.1	177.1	2.72	340.079	[M-H]-	C09264	Esculin (6,7-Dihydroxycoumarin-6-glucoside)	Coumarins	8480000	7810000	8100000	8170000	16400000	17300000	9160000	307000	895000	806000	570000	281000	464000
pme3434	211.1	137.1	4.62	212.069	[M-H]-	-	Eudesmic acid (3,4,5-trimethoxybenzoic acid)	Benzoic acid derivatives	196000	183000	202000	199000	11600	25100	39400	941000	223000	597000	36400	22000	22100
pme3439	271.1	135.1	5.49	272.069	[M-H]-	C08578	Butein	Flavanone	10800	11300	11800	12200	7860	2740	8210	9090	8560	4620	10100	17000	22300
pme3442	477.1	301.1	3.76	478.36	[M-H]-	-	Quercetin 7-O-β-D-Glucuronide	Flavonol	24000000	23700000	21900000	21200000	14200000	11500000	16100000	14400000	31300000	22100000	30300000	34500000	36100000
pme3443	207.1	177.1	4.61	208	[M-H]-	-	Sinapinaldehyde	Hydroxycinnamoyl derivatives	635000	605000	607000	638000	557000	1100000	953000	678000	307000	697000	521000	288000	248000
pme3451	395.1	213.2	8.09	394.142	[M+H]+	C07593	Rotenone	Isoflavone	253000	323000	313000	313000	384000	262000	122000	821000	586000	483000	352000	187000	139000
pme3453	147.1	129	4.42	148	[M-H]-	-	p-Coumaraldehyde	Hydroxycinnamoyl derivatives	10200	9060	9950	8010	10300	9	9	16800	11100	7560	34200	15900	11900
pme3459	317.2	281.3	7.47	316	[M+H]+	C09066	Caffeyl alcohol	Hydroxycinnamoyl derivatives	5040000	5470000	5280000	4840000	13500000	14700000	14100000	4450000	5820000	5170000	3730000	9	9
pme3461	301.1	151	5.75	302.279	[M-H]-	C09756	Homoeriodictyol	Flavanone	154000	122000	140000	147000	93100	23600	30800	12600	42900	37000	106000	442000	572000
pme3464	285.1	164	6.98	286.084	[M-H]-	C05334	Isosakuranetin (4'-Methylnaringenin)	Flavanone	30700	28600	29400	28700	16400	12800	16700	8040	5360	13400	159000	95100	65100
pme3469	741.2	433.2	3.35	740.216	[M+H]+	C10178	Kaempferol-3-O-robinoside-7-O-rhamnoside (Robinin)	Flavonol	635000	777000	733000	813000	1000000	730000	1170000	173000	203000	207000	225000	55700	85300
pme3473	271.1	151	5.59	272.069	[M-H]-	C09614	Butin	Flavone	15800000	15200000	14300000	14400000	9220000	2050000	9520000	9170000	9880000	7490000	16100000	23800000	32000000
pme3478	277.1	146.2	2.84	278.13	[M-H]-	C00831	Pantetheine	Vitamins	137000	123000	117000	125000	44000	26300	66400	234000	120000	99900	241000	179000	93200
pme3484	479.1	317.3	3.53	480.09	[M-H]-	-	Myricetin 3-O-galactoside	Flavonol	11500000	10900000	11600000	11800000	17300000	2080000	12900000	1010000	51000	748000	2960000	3500000	5900000
pme3502	429.1	267.1	4.59	430.126	[M-H]-	C10509	Formononetin 7-O-glucoside (Ononin)	Isoflavone	284000	331000	303000	322000	451000	152000	238000	111000	230000	374000	129000	261000	314000
pme3509	255.1	137.1	4.75	254.058	[M+H]+	C12123	7,4'-Dihydroxyflavone	Flavone	39800	55300	70800	56700	41400	72700	44800	9	62000	75300	9	33200	27600
pme3514	301	151.1	5.11	302.043	[M-H]-	C10105	Morin	Flavonol	6740000	6640000	6690000	6930000	8110000	977000	2400000	1180000	2410000	1310000	11200000	12500000	20200000
pme3553	187	131	5.94	186.032	[M+H]+	C09305	Psoralen	Coumarins	78500	73400	80800	74900	99600	45500	65700	34200	50100	26600	90700	60900	56500
pme3564	179	179	3.19	178.027	[M+H]+	C03093	Daphnetin	Coumarins	2430000	6730000	4150000	7040000	3560000	6600000	5900000	10500000	8030000	9190000	11000000	4020000	3050000
pme3569	207.1	207.1	4.77	206.058	[M+H]+	C09311	Scoparone	Coumarins	33100	46500	38600	38500	9	9	9	67800	33200	32600	21200	6100	9
pme3576	138.1	91.9	4.07	137.048	[M+H]+	C00108	Anthranilic acid	Benzoic acid derivatives	70800	135000	143000	155000	47400	36600	85300	85700	68900	84300	89300	112000	451000
pme3705	193.1	72.9	0.72	194.043	[M-H]-	C00191	D-glucoronic acid	Carbohydrates	154000	229000	176000	202000	113000	104000	149000	205000	210000	249000	279000	230000	137000
pme3719	165.1	74.9	0.75	166.048	[M-H]-	-	D-Xylonic acid	Organic acids	17000000	19400000	17700000	19800000	23300000	38700000	28200000	9780000	14000000	18000000	15200000	12500000	11600000
pme3732	244.1	111.4	0.83	243.086	[M+H]+	C00475	Cytidine	Nucleotide and its derivates	6640000	7780000	7340000	8080000	3950000	5930000	6050000	18500000	9760000	9450000	10800000	9	5870000
pme3825	196.2	103.9	1.16	197.069	[M-H]-	C00355	3,4-Dihydroxy-DL-phenylalanine	Amino acid derivatives	36300	37700	31800	37000	16200	8160	13300	36700	18000	32300	61200	96800	173000
pme3838	346.2	152	1.33	345.047	[M+H]+	C00942	Guanosine 3',5'-cyclic monophosphate	Nucleotide and its derivates	5560000	6760000	5940000	6150000	420000	295000	388000	9430000	7150000	3410000	10500000	12000000	19200000
pme3840	204.1	71.7	0.76	205.131	[M-H]-	C05944	Pantothenol	Alcohols and polyols	44800	37400	40200	47300	9	39400	15100	118000	29300	87600	56500	23900	9
pme3960	250	131	1.88	251.102	[M-H]-	C00559	Deoxyadenosine	Nucleotide and its derivates	9230	12500	11700	9490	9	9	9	35800	16600	16100	26300	23700	22700
pme3965	310	178.1	2.18	311.123	[M-H]-	-	2-(dimethylamino)guanosine	Nucleotide and its derivates	75600	52300	53600	51500	21600	15800	65400	84900	89800	88500	99700	62800	52000
pme3970	243	153.1	1.21	244.07	[M-H]-	C02067	β-Pseudouridine	Nucleotide and its derivates	808000	955000	895000	995000	127000	175000	305000	1940000	976000	852000	1740000	1500000	1400000
pme3982	267.1	135.1	1.48	268.081	[M-H]-	-	Hypoxanthine-9-β-D-arabinofuranoside	Nucleotide and its derivates	3400000	3820000	3610000	3780000	760000	600000	1960000	3580000	4750000	4710000	6420000	4710000	5520000
