# Supplementary material for: Amino acids profiling and transcriptomic data integration demonstrates the dynamic regulation of amino acids synthesis in the leaves of Cyclocarya paliurus
Source: PeerJ. 2022 Jul 5;10:e13689. doi: 10.7717/peerj.13689 (PMC9266588; doi:10.7717/peerj.13689)
Supplement: Supplemental Information 10 [file peerj-10-13689-s010.xlsx]

## Sheet: Sheet1
Table S4 Information and content of amino acids.
Index	KEGG ID	Compounds	Q1(Da)	Q3(Da)	Rt	Molecular Weight (Da)	S3-1	S3-2	S3-3	S2-1	S2-2	S2-3	S1-1	S1-2	S1-3
pme0006	C00148	Proline	1160	70	0.81	115	188000	80500	184000	6180000	1010000	3940000	2520000	1650000	1150000
pme0009	C00065	Serine	104	73.9	0.79	105	94400	61200	83100	1200000	1320000	1150000	1070000	960000	826000
pme0011	C00049	Aspartic acid	132	99.9	0.8	133.037	844000	1640000	1520000	4290000	2980000	3570000	5890000	6260000	3690000
pme0013	C00025	Glutamic acid	146.1	102.1	0.75	147.053	5280000	3700000	5500000	7960000	10100000	10100000	8190000	6180000	5380000
pme0018	C00123	Leucine	130.1	130.1	1.27	131.095	30000	39900	25500	112000	118000	70900	93100	191000	152000
pme0020	C00079	Phenylalanine	164.1	147.1	1.92	165.079	3360000	2340000	3900000	33700000	23400000	22800000	27300000	23600000	26300000
pme0022	C00188	Threonine	118	100.9	0.76	119.058	167000	146000	197000	1470000	876000	709000	900000	743000	570000
pme0026	C00047	Lysine	147	83.2	0.78	146.106	4090000	6480000	6850000	13800000	13300000	16600000	9330000	6900000	9230000
pme0036	C00135	Histidine	154.1	92.9	0.72	155.07	7570	6170	19800	109000	67800	93500	323000	280000	346000
pme0039	C00183	Valine	118.1	71.8	0.85	117.079	24700000	18100000	25600000	57300000	49000000	49100000	45000000	43700000	41600000
pme0042	C00062	Arginine	173.1	131.1	0.73	174.112	10500	9	148000	54900	118000	286000	4550000	7450000	7360000
pme0050	C00078	Tryptophan	203	116.1	2.39	204.09	579000	568000	1300000	59600000	21600000	9440000	98000000	56000000	40300000
pme0226	C00152	Asparagine	131.1	71.8	0.78	132.054	15500	17600	18200	162000	97600	140000	229000	310000	436000
pme1070	C00082	Tyrosine	180.1	163	1.16	181.074	162000	34900	84200	645000	438000	383000	1130000	973000	1070000
pme1104	C00407	Isoleucine	130.1	130.1	1.26	131.095	19200	10800	12400	46900	45600	34200	48400	96500	76700
pme1210	C00073	Methionine	150	72.8	1.15	149.051	84900	47800	145000	676000	839000	854000	332000	681000	639000
pme1408	C00064	Glutamine	145.1	127.1	0.76	146.069	49700	75700	98300	1100000	659000	981000	848000	947000	915000
pme1988	C00041	Alanine	90	71.8	0.78	89.048	3310000	3080000	3220000	2130000	3550000	3080000	1560000	696000	334000
