# Supplementary material for: Amino acids profiling and transcriptomic data integration demonstrates the dynamic regulation of amino acids synthesis in the leaves of Cyclocarya paliurus
Source: PeerJ. 2022 Jul 5;10:e13689. doi: 10.7717/peerj.13689 (PMC9266588; doi:10.7717/peerj.13689)
Supplement: Supplemental Information 11 [file peerj-10-13689-s011.xlsx]

## Sheet: Sheet1
Table S5 Annotation of all unigenes
#Gene	GO	KEGG
TRINITY_DN72513_c0_g1	GO:0005524, ATP binding;GO:0009570, chloroplast stroma;GO:0015979, photosynthesis;GO:0015995, chlorophyll biosynthetic process;GO:0016851, magnesium chelatase activity;GO:0031969, chloroplast membrane	-
TRINITY_DN64618_c0_g1	GO:0005783, endoplasmic reticulum;GO:0005811, lipid particle;GO:0016042, lipid catabolic process;GO:0016298, lipase activity;GO:0019915, lipid storage	-
TRINITY_DN190419_c0_g1	GO:0008152, metabolic process;GO:0016874, ligase activity	-
TRINITY_DN18969_c0_g1	GO:0005743, mitochondrial inner membrane;GO:0008121, ubiquinol-cytochrome-c reductase activity;GO:0016021, integral component of membrane;GO:0046872, metal ion binding;GO:0051537, 2 iron, 2 sulfur cluster binding;GO:0070469, respiratory chain	-
TRINITY_DN196331_c0_g1	GO:0003677, DNA binding;GO:0003700, transcription factor activity, sequence-specific DNA binding;GO:0005737, cytoplasm;GO:0006351, transcription, DNA-templated;GO:0046914, transition metal ion binding	-
TRINITY_DN52204_c0_g1	GO:0016020, membrane;GO:0016021, integral component of membrane;GO:0022624, proteasome accessory complex;GO:0030234, enzyme regulator activity;GO:0042176, regulation of protein catabolic process;GO:0070062, extracellular exosome	-
TRINITY_DN197234_c0_g1	-	-
TRINITY_DN20240_c0_g1	GO:0004637, phosphoribosylamine-glycine ligase activity;GO:0004641, phosphoribosylformylglycinamidine cyclo-ligase activity;GO:0005524, ATP binding;GO:0005829, cytosol;GO:0006189, 'de novo' IMP biosynthetic process;GO:0009113, purine nucleobase biosynthetic process;GO:0046872, metal ion binding	-
TRINITY_DN64601_c0_g1	-	-
TRINITY_DN61422_c0_g1	-	-
TRINITY_DN177611_c0_g1	GO:0016787, hydrolase activity;GO:0016791, phosphatase activity;GO:0046351, disaccharide biosynthetic process	-
TRINITY_DN135968_c0_g1	GO:0016021, integral component of membrane;GO:0018193, peptidyl-amino acid modification	-
TRINITY_DN145457_c0_g1	GO:0003677, DNA binding;GO:0003918, DNA topoisomerase type II (ATP-hydrolyzing) activity;GO:0005524, ATP binding;GO:0005694, chromosome;GO:0006265, DNA topological change;GO:0007059, chromosome segregation;GO:0019897, extrinsic component of plasma membrane	-
TRINITY_DN143066_c0_g1	-	-
TRINITY_DN957_c0_g1	-	-
TRINITY_DN220151_c0_g1	-	-
TRINITY_DN109059_c0_g1	GO:0003824, catalytic activity;GO:0030151, molybdenum ion binding;GO:0030170, pyridoxal phosphate binding	-
TRINITY_DN82577_c1_g1	-	-
TRINITY_DN92715_c0_g1	GO:0000139, Golgi membrane;GO:0005768, endosome;GO:0005774, vacuolar membrane;GO:0005794, Golgi apparatus;GO:0005802, trans-Golgi network;GO:0008168, methyltransferase activity;GO:0008270, zinc ion binding;GO:0008757, S-adenosylmethionine-dependent methyltransferase activity;GO:0016021, integral component of membrane;GO:0032259, methylation	-
TRINITY_DN213126_c0_g1	GO:0000166, nucleotide binding;GO:0005622, intracellular;GO:0005737, cytoplasm;GO:0005975, carbohydrate metabolic process;GO:0005980, glycogen catabolic process;GO:0008184, glycogen phosphorylase activity;GO:0030170, pyridoxal phosphate binding	-
TRINITY_DN173597_c0_g1	-	-
TRINITY_DN92700_c1_g1	GO:0003676, nucleic acid binding	-
TRINITY_DN92700_c1_g2	GO:0003676, nucleic acid binding	-
TRINITY_DN92700_c1_g3	GO:0003676, nucleic acid binding	-
TRINITY_DN92700_c1_g4	GO:0003676, nucleic acid binding	-
TRINITY_DN92700_c1_g5	GO:0003676, nucleic acid binding	-
TRINITY_DN92700_c1_g6	GO:0003676, nucleic acid binding	-
TRINITY_DN92700_c1_g7	GO:0003676, nucleic acid binding	-
TRINITY_DN92544_c0_g5	GO:0000145, exocyst;GO:0005829, cytosol;GO:0005886, plasma membrane;GO:0006887, exocytosis;GO:0045335, phagocytic vesicle;GO:0070062, extracellular exosome	-
TRINITY_DN92544_c0_g4	GO:0004127, cytidylate kinase activity;GO:0005524, ATP binding;GO:0005634, nucleus;GO:0005737, cytoplasm;GO:0006207, 'de novo' pyrimidine nucleobase biosynthetic process;GO:0006221, pyrimidine nucleotide biosynthetic process;GO:0009041, uridylate kinase activity;GO:0016021, integral component of membrane;GO:0046899, nucleoside triphosphate adenylate kinase activity	K13800-ko00240 Pyrimidine metabolism
TRINITY_DN92715_c0_g2	GO:0000139, Golgi membrane;GO:0005634, nucleus;GO:0005768, endosome;GO:0005774, vacuolar membrane;GO:0005794, Golgi apparatus;GO:0005802, trans-Golgi network;GO:0008168, methyltransferase activity;GO:0008270, zinc ion binding;GO:0008757, S-adenosylmethionine-dependent methyltransferase activity;GO:0016021, integral component of membrane;GO:0032259, methylation	-
TRINITY_DN92544_c0_g1	-	-
TRINITY_DN72121_c1_g1	GO:0004739, pyruvate dehydrogenase (acetyl-transferring) activity;GO:0005739, mitochondrion;GO:0005967, mitochondrial pyruvate dehydrogenase complex;GO:0006086, acetyl-CoA biosynthetic process from pyruvate;GO:0006096, glycolytic process;GO:0006526, arginine biosynthetic process;GO:0006542, glutamine biosynthetic process;GO:0042645, mitochondrial nucleoid	-
TRINITY_DN92544_c0_g2	GO:0000145, exocyst;GO:0005829, cytosol;GO:0005886, plasma membrane;GO:0006887, exocytosis;GO:0045335, phagocytic vesicle;GO:0070062, extracellular exosome	-
TRINITY_DN88042_c1_g6	GO:0016491, oxidoreductase activity;GO:0046872, metal ion binding;GO:0051539, 4 iron, 4 sulfur cluster binding;GO:0051604, protein maturation	-
TRINITY_DN81835_c0_g1	GO:0002159, desmosome assembly;GO:0005080, protein kinase C binding;GO:0005634, nucleus;GO:0005654, nucleoplasm;GO:0005882, intermediate filament;GO:0005886, plasma membrane;GO:0005911, cell-cell junction;GO:0005912, adherens junction;GO:0007507, heart development;GO:0008285, negative regulation of cell proliferation;GO:0010765, positive regulation of sodium ion transport;GO:0014704, intercalated…	-
TRINITY_DN88042_c1_g4	GO:0004315, 3-oxoacyl-[acyl-carrier-protein] synthase activity;GO:0005829, cytosol;GO:0006633, fatty acid biosynthetic process;GO:0008152, metabolic process;GO:0008610, lipid biosynthetic process	-
TRINITY_DN88042_c1_g5	GO:0003725, double-stranded RNA binding;GO:0008270, zinc ion binding;GO:0016743, carboxyl- or carbamoyltransferase activity;GO:0046944, protein carbamoylation;GO:0051604, protein maturation	-
TRINITY_DN88042_c1_g2	GO:0004553, hydrolase activity, hydrolyzing O-glycosyl compounds;GO:0005829, cytosol;GO:0005975, carbohydrate metabolic process;GO:0008422, beta-glucosidase activity;GO:0008706, 6-phospho-beta-glucosidase activity;GO:0044724, single-organism carbohydrate catabolic process;GO:1901657, glycosyl compound metabolic process	K01188-ko00940 Phenylpropanoid biosynthesis;ko00460 Cyanoamino acid metabolism;ko00500 Starch and sucrose metabolism
TRINITY_DN88042_c1_g3	GO:0003725, double-stranded RNA binding;GO:0008270, zinc ion binding;GO:0016743, carboxyl- or carbamoyltransferase activity;GO:0046944, protein carbamoylation;GO:0051604, protein maturation	-
TRINITY_DN88042_c1_g1	GO:0010438, cellular response to sulfur starvation;GO:0097264, self proteolysis	-
TRINITY_DN125596_c0_g1	GO:0005783, endoplasmic reticulum;GO:0016021, integral component of membrane;GO:0055085, transmembrane transport	-
TRINITY_DN188800_c0_g1	GO:0016021, integral component of membrane	-
TRINITY_DN22816_c0_g1	-	-
TRINITY_DN175936_c0_g1	-	-
TRINITY_DN178142_c0_g1	-	-
TRINITY_DN40141_c0_g1	-	-
TRINITY_DN167730_c0_g1	-	-
TRINITY_DN58116_c0_g2	GO:0000250, lanosterol synthase activity;GO:0006694, steroid biosynthetic process;GO:0016866, intramolecular transferase activity	-
TRINITY_DN103852_c0_g1	GO:0000287, magnesium ion binding;GO:0004642, phosphoribosylformylglycinamidine synthase activity;GO:0005524, ATP binding;GO:0005737, cytoplasm;GO:0006189, 'de novo' IMP biosynthetic process	-
TRINITY_DN58116_c0_g1	GO:0000250, lanosterol synthase activity;GO:0005829, cytosol;GO:0006696, ergosterol biosynthetic process;GO:0016866, intramolecular transferase activity	-
TRINITY_DN18205_c0_g1	GO:0005739, mitochondrion;GO:0005779, integral component of peroxisomal membrane;GO:0005783, endoplasmic reticulum;GO:0016559, peroxisome fission;GO:0019395, fatty acid oxidation;GO:0044375, regulation of peroxisome size;GO:1990429, peroxisomal importomer complex	-
TRINITY_DN116726_c0_g1	-	-
TRINITY_DN113810_c0_g1	GO:0001731, formation of translation preinitiation complex;GO:0002183, cytoplasmic translational initiation;GO:0002188, translation reinitiation;GO:0003743, translation initiation factor activity;GO:0006446, regulation of translational initiation;GO:0016282, eukaryotic 43S preinitiation complex;GO:0022627, cytosolic small ribosomal subunit;GO:0033290, eukaryotic 48S preinitiation complex;GO:00343…	-
TRINITY_DN109403_c0_g1	GO:0016672, oxidoreductase activity, acting on a sulfur group of donors, quinone or similar compound as acceptor;GO:0030091, protein repair;GO:0042128, nitrate assimilation;GO:0042597, periplasmic space;GO:0043546, molybdopterin cofactor binding;GO:0046872, metal ion binding	-
TRINITY_DN116182_c0_g1	GO:0000287, magnesium ion binding;GO:0004315, 3-oxoacyl-[acyl-carrier-protein] synthase activity;GO:0004316, 3-oxoacyl-[acyl-carrier-protein] reductase (NADPH) activity;GO:0004321, fatty-acyl-CoA synthase activity;GO:0006633, fatty acid biosynthetic process;GO:0008897, holo-[acyl-carrier-protein] synthase activity	-
TRINITY_DN186127_c0_g1	GO:0004418, hydroxymethylbilane synthase activity;GO:0006782, protoporphyrinogen IX biosynthetic process;GO:0018160, peptidyl-pyrromethane cofactor linkage;GO:0033014, tetrapyrrole biosynthetic process	-
TRINITY_DN153023_c0_g1	-	-
TRINITY_DN183859_c0_g1	-	-
TRINITY_DN180993_c0_g1	-	-
TRINITY_DN52809_c0_g1	-	-
TRINITY_DN143145_c0_g1	-	-
TRINITY_DN34342_c0_g1	-	-
TRINITY_DN89134_c0_g1	-	-
TRINITY_DN89134_c0_g2	GO:0016021, integral component of membrane	-
TRINITY_DN89134_c0_g3	-	-
TRINITY_DN70939_c0_g1	GO:0000324, fungal-type vacuole;GO:0000329, fungal-type vacuole membrane;GO:0006816, calcium ion transport;GO:0006874, cellular calcium ion homeostasis;GO:0015369, calcium:proton antiporter activity;GO:0015386, potassium:proton antiporter activity;GO:0016021, integral component of membrane;GO:0046872, metal ion binding;GO:0055085, transmembrane transport	-
TRINITY_DN70939_c0_g3	GO:0000324, fungal-type vacuole;GO:0000329, fungal-type vacuole membrane;GO:0006816, calcium ion transport;GO:0006874, cellular calcium ion homeostasis;GO:0015369, calcium:proton antiporter activity;GO:0015386, potassium:proton antiporter activity;GO:0016021, integral component of membrane;GO:0046872, metal ion binding;GO:0055085, transmembrane transport	-
TRINITY_DN70939_c0_g2	GO:0000324, fungal-type vacuole;GO:0005774, vacuolar membrane;GO:0005783, endoplasmic reticulum;GO:0005789, endoplasmic reticulum membrane;GO:0015085, calcium ion transmembrane transporter activity;GO:0015369, calcium:proton antiporter activity;GO:0015386, potassium:proton antiporter activity;GO:0016021, integral component of membrane;GO:0046872, metal ion binding;GO:0070588, calcium ion transmem…	-
TRINITY_DN33440_c0_g1	GO:0000302, response to reactive oxygen species;GO:0005739, mitochondrion;GO:0016491, oxidoreductase activity;GO:0042762, regulation of sulfur metabolic process;GO:0048038, quinone binding	-
TRINITY_DN93702_c0_g2	GO:0005634, nucleus;GO:0005829, cytosol;GO:0016192, vesicle-mediated transport	-
TRINITY_DN146182_c0_g1	GO:0004092, carnitine O-acetyltransferase activity;GO:0005743, mitochondrial inner membrane;GO:0005777, peroxisome;GO:0006631, fatty acid metabolic process;GO:0006810, transport;GO:0016746, transferase activity, transferring acyl groups	-
TRINITY_DN74577_c0_g1	GO:0000122, negative regulation of transcription from RNA polymerase II promoter;GO:0000978, RNA polymerase II core promoter proximal region sequence-specific DNA binding;GO:0001078, transcriptional repressor activity, RNA polymerase II core promoter proximal region sequence-specific binding;GO:0003676, nucleic acid binding;GO:0003677, DNA binding;GO:0003700, transcription factor activity, sequen…	-
TRINITY_DN191924_c0_g1	-	-
TRINITY_DN212924_c0_g1	GO:0003676, nucleic acid binding;GO:0005524, ATP binding;GO:0005737, cytoplasm;GO:0006418, tRNA aminoacylation for protein translation;GO:0050560, aspartate-tRNA(Asn) ligase activity	-
TRINITY_DN143775_c0_g1	GO:0008324, cation transmembrane transporter activity;GO:0016021, integral component of membrane	-
TRINITY_DN188015_c0_g1	-	-
TRINITY_DN194468_c0_g1	GO:0005634, nucleus;GO:0005737, cytoplasm;GO:0005829, cytosol;GO:0008270, zinc ion binding;GO:0016491, oxidoreductase activity	-
TRINITY_DN64765_c0_g1	GO:0000470, maturation of LSU-rRNA;GO:0002181, cytoplasmic translation;GO:0003723, RNA binding;GO:0003735, structural constituent of ribosome;GO:0005840, ribosome;GO:0006412, translation;GO:0022625, cytosolic large ribosomal subunit;GO:0042254, ribosome biogenesis	-
TRINITY_DN141417_c0_g1	GO:0004675, transmembrane receptor protein serine/threonine kinase activity;GO:0004702, signal transducer, downstream of receptor, with serine/threonine kinase activity;GO:0005524, ATP binding;GO:0016021, integral component of membrane	-
TRINITY_DN219212_c0_g1	GO:0005524, ATP binding;GO:0006090, pyruvate metabolic process;GO:0016301, kinase activity;GO:0046872, metal ion binding;GO:0050242, pyruvate, phosphate dikinase activity	-
TRINITY_DN164397_c0_g1	GO:0004867, serine-type endopeptidase inhibitor activity;GO:0005576, extracellular region;GO:0005578, proteinaceous extracellular matrix;GO:0005581, collagen trimer;GO:0005589, collagen type VI trimer;GO:0005615, extracellular space;GO:0005788, endoplasmic reticulum lumen;GO:0007155, cell adhesion;GO:0007517, muscle organ development;GO:0030198, extracellular matrix organization;GO:0030574, colla…	-
TRINITY_DN95247_c0_g2	GO:0005886, plasma membrane;GO:0016021, integral component of membrane	-
TRINITY_DN85501_c2_g1	GO:0000166, nucleotide binding;GO:0003723, RNA binding;GO:0005654, nucleoplasm;GO:0006397, mRNA processing;GO:0009507, chloroplast;GO:0009799, specification of symmetry;GO:0009944, polarity specification of adaxial/abaxial axis;GO:0009954, proximal/distal pattern formation;GO:0030529, intracellular ribonucleoprotein complex;GO:0048441, petal development	-
TRINITY_DN123254_c0_g1	GO:0000794, condensed nuclear chromosome;GO:0005634, nucleus;GO:0005654, nucleoplasm;GO:0005730, nucleolus;GO:0005739, mitochondrion;GO:0006364, rRNA processing;GO:0006409, tRNA export from nucleus;GO:0032040, small-subunit processome;GO:0032545, CURI complex;GO:0034456, UTP-C complex	-
TRINITY_DN112177_c0_g1	-	-
TRINITY_DN117553_c0_g1	GO:0005975, carbohydrate metabolic process;GO:0016021, integral component of membrane;GO:0016787, hydrolase activity	-
TRINITY_DN204587_c0_g1	-	-
TRINITY_DN218806_c0_g1	-	-
TRINITY_DN150275_c0_g1	-	-
TRINITY_DN215898_c0_g1	GO:0005623, cell;GO:0016152, mercury (II) reductase activity;GO:0016668, oxidoreductase activity, acting on a sulfur group of donors, NAD(P) as acceptor;GO:0030001, metal ion transport;GO:0045340, mercury ion binding;GO:0045454, cell redox homeostasis;GO:0050660, flavin adenine dinucleotide binding;GO:0050661, NADP binding;GO:0050787, detoxification of mercury ion	-
TRINITY_DN218254_c0_g1	GO:0005783, endoplasmic reticulum;GO:0005789, endoplasmic reticulum membrane;GO:0006696, ergosterol biosynthetic process;GO:0008204, ergosterol metabolic process;GO:0008374, O-acyltransferase activity;GO:0016021, integral component of membrane;GO:0030176, integral component of endoplasmic reticulum membrane;GO:0034737, ergosterol O-acyltransferase activity	-
TRINITY_DN93702_c0_g4	-	-
TRINITY_DN103_c0_g1	-	-
TRINITY_DN124984_c0_g1	GO:0016021, integral component of membrane;GO:0016747, transferase activity, transferring acyl groups other than amino-acyl groups	-
TRINITY_DN93702_c0_g5	GO:0005634, nucleus;GO:0005829, cytosol;GO:0016192, vesicle-mediated transport	-
TRINITY_DN158599_c0_g1	-	-
TRINITY_DN68830_c0_g1	GO:0003730, mRNA 3'-UTR binding;GO:0003960, NADPH:quinone reductase activity;GO:0005634, nucleus;GO:0005737, cytoplasm;GO:0005829, cytosol;GO:0007601, visual perception;GO:0008270, zinc ion binding;GO:0017091, AU-rich element binding;GO:0032440, 2-alkenal reductase [NAD(P)] activity;GO:0034599, cellular response to oxidative stress;GO:0042178, xenobiotic catabolic process;GO:0051289, protein homo…	-
TRINITY_DN194794_c0_g1	-	-
TRINITY_DN93979_c2_g1	GO:0003677, DNA binding;GO:0003700, transcription factor activity, sequence-specific DNA binding;GO:0005634, nucleus;GO:0006351, transcription, DNA-templated;GO:0010043, response to zinc ion;GO:0043565, sequence-specific DNA binding	-
TRINITY_DN40839_c0_g1	GO:0003735, structural constituent of ribosome;GO:0005840, ribosome;GO:0006414, translational elongation	K02942-ko03010 Ribosome
TRINITY_DN49411_c0_g1	-	-
TRINITY_DN18403_c0_g1	-	-
TRINITY_DN93979_c2_g5	GO:0003677, DNA binding;GO:0003700, transcription factor activity, sequence-specific DNA binding;GO:0005634, nucleus;GO:0006351, transcription, DNA-templated;GO:0010043, response to zinc ion;GO:0043565, sequence-specific DNA binding	-
TRINITY_DN93979_c2_g6	-	-
TRINITY_DN113610_c0_g1	-	-
TRINITY_DN158172_c0_g1	-	-
TRINITY_DN22946_c0_g1	-	-
TRINITY_DN173105_c0_g1	GO:0005351, sugar:proton symporter activity;GO:0005355, glucose transmembrane transporter activity;GO:0005886, plasma membrane;GO:0005887, integral component of plasma membrane;GO:0008643, carbohydrate transport;GO:0015295, solute:proton symporter activity;GO:0015793, glycerol transport;GO:0016021, integral component of membrane;GO:0022891, substrate-specific transmembrane transporter activity;GO…	-
TRINITY_DN95447_c1_g1	GO:0005578, proteinaceous extracellular matrix;GO:0005615, extracellular space;GO:0005634, nucleus;GO:0005796, Golgi lumen;GO:0006024, glycosaminoglycan biosynthetic process;GO:0009897, external side of plasma membrane;GO:0031225, anchored component of membrane;GO:0070062, extracellular exosome	-
TRINITY_DN103925_c0_g1	-	-
TRINITY_DN72025_c0_g1	GO:0016021, integral component of membrane;GO:0016301, kinase activity;GO:0055085, transmembrane transport	-
TRINITY_DN175344_c0_g1	-	-
TRINITY_DN116832_c0_g1	GO:0005634, nucleus;GO:0005829, cytosol;GO:0016021, integral component of membrane;GO:0031965, nuclear membrane	-
TRINITY_DN129866_c0_g1	-	-
TRINITY_DN152616_c0_g1	-	-
TRINITY_DN196763_c0_g1	-	-
TRINITY_DN159999_c0_g1	-	-
TRINITY_DN166616_c0_g1	GO:0004871, signal transducer activity;GO:0006935, chemotaxis;GO:0016021, integral component of membrane	-
TRINITY_DN91365_c1_g1	-	-
TRINITY_DN86230_c0_g2	-	-
TRINITY_DN86230_c0_g3	-	-
TRINITY_DN4821_c0_g1	GO:0005337, nucleoside transmembrane transporter activity;GO:0005886, plasma membrane;GO:0016021, integral component of membrane	-
TRINITY_DN86230_c0_g1	GO:0000139, Golgi membrane;GO:0005768, endosome;GO:0005794, Golgi apparatus;GO:0005802, trans-Golgi network;GO:0006024, glycosaminoglycan biosynthetic process;GO:0006486, protein glycosylation;GO:0007275, multicellular organism development;GO:0009737, response to abscisic acid;GO:0009738, abscisic acid-activated signaling pathway;GO:0010087, phloem or xylem histogenesis;GO:0010401, pectic galacta…	K02366-ko00534 Glycosaminoglycan biosynthesis - heparan sulfate / heparin
TRINITY_DN130026_c0_g1	GO:0005737, cytoplasm;GO:0005992, trehalose biosynthetic process;GO:0033942, 4-alpha-D-{(1->4)-alpha-D-glucano}trehalose trehalohydrolase activity	-
TRINITY_DN94362_c1_g4	-	-
TRINITY_DN90874_c0_g4	-	-
TRINITY_DN88943_c0_g1	GO:0000502, proteasome complex;GO:0004298, threonine-type endopeptidase activity;GO:0005634, nucleus;GO:0005773, vacuole;GO:0005774, vacuolar membrane;GO:0005829, cytosol;GO:0005839, proteasome core complex;GO:0005886, plasma membrane;GO:0048046, apoplast;GO:0051603, proteolysis involved in cellular protein catabolic process	K02734-ko03050 Proteasome
TRINITY_DN90874_c0_g2	GO:0005737, cytoplasm;GO:0005774, vacuolar membrane;GO:0006914, autophagy;GO:0015031, protein transport;GO:0016192, vesicle-mediated transport;GO:0034045, pre-autophagosomal structure membrane;GO:0042594, response to starvation	-
TRINITY_DN90874_c0_g1	GO:0005737, cytoplasm;GO:0005774, vacuolar membrane;GO:0006914, autophagy;GO:0015031, protein transport;GO:0016192, vesicle-mediated transport;GO:0034045, pre-autophagosomal structure membrane;GO:0042594, response to starvation	-
TRINITY_DN88943_c0_g2	-	-
TRINITY_DN80301_c0_g1	-	-
TRINITY_DN196801_c0_g1	GO:0005576, extracellular region;GO:0008126, acetylesterase activity;GO:0016788, hydrolase activity, acting on ester bonds	-
TRINITY_DN80301_c0_g2	-	-
TRINITY_DN182603_c0_g1	GO:0005654, nucleoplasm;GO:0030054, cell junction	-
TRINITY_DN42205_c0_g1	-	-
TRINITY_DN85988_c0_g1	GO:0004109, coproporphyrinogen oxidase activity;GO:0005737, cytoplasm;GO:0006779, porphyrin-containing compound biosynthetic process;GO:0051536, iron-sulfur cluster binding	-
TRINITY_DN84935_c1_g14	-	-
TRINITY_DN85988_c0_g3	GO:0016021, integral component of membrane	-
TRINITY_DN85988_c0_g2	GO:0004109, coproporphyrinogen oxidase activity;GO:0005737, cytoplasm;GO:0006779, porphyrin-containing compound biosynthetic process;GO:0006782, protoporphyrinogen IX biosynthetic process;GO:0046872, metal ion binding;GO:0051536, iron-sulfur cluster binding;GO:0051537, 2 iron, 2 sulfur cluster binding;GO:0051539, 4 iron, 4 sulfur cluster binding	-
TRINITY_DN84935_c1_g11	-	-
TRINITY_DN84935_c1_g10	GO:0005634, nucleus;GO:0005783, endoplasmic reticulum;GO:0016036, cellular response to phosphate starvation	-
TRINITY_DN84935_c1_g13	GO:0005634, nucleus;GO:0005783, endoplasmic reticulum;GO:0016036, cellular response to phosphate starvation;GO:0080040, positive regulation of cellular response to phosphate starvation	-
TRINITY_DN84935_c1_g12	GO:0005634, nucleus;GO:0005783, endoplasmic reticulum;GO:0016036, cellular response to phosphate starvation	-
TRINITY_DN51917_c0_g1	GO:0002182, cytoplasmic translational elongation;GO:0003677, DNA binding;GO:0005737, cytoplasm;GO:0005829, cytosol;GO:0006450, regulation of translational fidelity;GO:0006457, protein folding;GO:0030544, Hsp70 protein binding;GO:0051082, unfolded protein binding	-
TRINITY_DN123000_c0_g1	-	-
TRINITY_DN194382_c0_g1	-	-
TRINITY_DN200269_c0_g1	-	-
TRINITY_DN140022_c0_g1	-	-
TRINITY_DN84479_c2_g1	GO:0005739, mitochondrion	-
TRINITY_DN74739_c0_g1	GO:0000166, nucleotide binding;GO:0003723, RNA binding;GO:0005634, nucleus;GO:0005681, spliceosomal complex;GO:0006397, mRNA processing;GO:0045292, mRNA cis splicing, via spliceosome;GO:1990446, U1 snRNP binding	-
TRINITY_DN84479_c2_g2	GO:0005739, mitochondrion	-
TRINITY_DN84479_c2_g5	GO:0008289, lipid binding	-
TRINITY_DN84479_c2_g4	-	-
TRINITY_DN84479_c2_g7	GO:0005739, mitochondrion	-
TRINITY_DN84479_c2_g6	GO:0005739, mitochondrion	-
TRINITY_DN86281_c0_g2	GO:0009408, response to heat;GO:0010181, FMN binding;GO:0016491, oxidoreductase activity	-
TRINITY_DN88834_c1_g2	GO:0000166, nucleotide binding;GO:0003723, RNA binding;GO:0003968, RNA-directed 5'-3' RNA polymerase activity;GO:0006952, defense response;GO:0009615, response to virus;GO:0009751, response to salicylic acid;GO:0010025, wax biosynthetic process;GO:0030422, production of siRNA involved in RNA interference;GO:0060148, positive regulation of posttranscriptional gene silencing	-
TRINITY_DN74385_c0_g2	-	-
TRINITY_DN216751_c0_g1	-	-
TRINITY_DN74385_c0_g1	-	-
TRINITY_DN189265_c0_g1	GO:0003735, structural constituent of ribosome;GO:0005840, ribosome;GO:0006412, translation;GO:0008097, 5S rRNA binding	-
TRINITY_DN85807_c1_g1	-	-
TRINITY_DN85807_c1_g2	GO:0003700, transcription factor activity, sequence-specific DNA binding;GO:0005634, nucleus;GO:0005829, cytosol;GO:0006351, transcription, DNA-templated;GO:0006952, defense response;GO:0007231, osmosensory signaling pathway;GO:0008272, sulfate transport;GO:0009294, DNA mediated transformation;GO:0009970, cellular response to sulfate starvation;GO:0043565, sequence-specific DNA binding;GO:0045596…	K20557-ko04016 MAPK signaling pathway - plant
TRINITY_DN85807_c1_g3	GO:0004674, protein serine/threonine kinase activity;GO:0005524, ATP binding;GO:0005622, intracellular;GO:0005829, cytosol;GO:0005886, plasma membrane;GO:0016301, kinase activity;GO:0018105, peptidyl-serine phosphorylation;GO:0035556, intracellular signal transduction;GO:0040008, regulation of growth;GO:0046777, protein autophosphorylation;GO:0046872, metal ion binding	-
TRINITY_DN85807_c1_g4	GO:0003700, transcription factor activity, sequence-specific DNA binding;GO:0005634, nucleus;GO:0005829, cytosol;GO:0006351, transcription, DNA-templated;GO:0006952, defense response;GO:0007231, osmosensory signaling pathway;GO:0008272, sulfate transport;GO:0009294, DNA mediated transformation;GO:0009970, cellular response to sulfate starvation;GO:0043565, sequence-specific DNA binding;GO:0045596…	-
TRINITY_DN85807_c1_g5	-	-
TRINITY_DN85807_c1_g6	-	-
TRINITY_DN92192_c0_g1	GO:0005506, iron ion binding;GO:0005759, mitochondrial matrix;GO:0006879, cellular iron ion homeostasis;GO:0016226, iron-sulfur cluster assembly;GO:0036455, iron-sulfur transferase activity;GO:0043234, protein complex;GO:0044571, [2Fe-2S] cluster assembly;GO:0051537, 2 iron, 2 sulfur cluster binding;GO:0097428, protein maturation by iron-sulfur cluster transfer	-
TRINITY_DN92192_c0_g2	GO:0005759, mitochondrial matrix;GO:0006879, cellular iron ion homeostasis;GO:0008198, ferrous iron binding;GO:0036455, iron-sulfur transferase activity;GO:0043234, protein complex;GO:0044571, [2Fe-2S] cluster assembly;GO:0051537, 2 iron, 2 sulfur cluster binding;GO:0051539, 4 iron, 4 sulfur cluster binding;GO:0097428, protein maturation by iron-sulfur cluster transfer	-
TRINITY_DN92192_c0_g3	GO:0005759, mitochondrial matrix;GO:0006879, cellular iron ion homeostasis;GO:0008198, ferrous iron binding;GO:0036455, iron-sulfur transferase activity;GO:0043234, protein complex;GO:0044571, [2Fe-2S] cluster assembly;GO:0051537, 2 iron, 2 sulfur cluster binding;GO:0051539, 4 iron, 4 sulfur cluster binding;GO:0097428, protein maturation by iron-sulfur cluster transfer	-
TRINITY_DN92192_c0_g4	GO:0005506, iron ion binding;GO:0005759, mitochondrial matrix;GO:0006879, cellular iron ion homeostasis;GO:0008198, ferrous iron binding;GO:0016226, iron-sulfur cluster assembly;GO:0036455, iron-sulfur transferase activity;GO:0043234, protein complex;GO:0044571, [2Fe-2S] cluster assembly;GO:0051536, iron-sulfur cluster binding;GO:0051537, 2 iron, 2 sulfur cluster binding;GO:0051539, 4 iron, 4 sul…	-
TRINITY_DN168754_c0_g1	-	-
TRINITY_DN184025_c0_g1	-	-
TRINITY_DN89165_c1_g1	GO:0005789, endoplasmic reticulum membrane;GO:0006487, protein N-linked glycosylation;GO:0006490, oligosaccharide-lipid intermediate biosynthetic process;GO:0016021, integral component of membrane;GO:0042281, dolichyl pyrophosphate Man9GlcNAc2 alpha-1,3-glucosyltransferase activity	K03848-ko00510 N-Glycan biosynthesis
TRINITY_DN10495_c0_g1	GO:0003743, translation initiation factor activity	-
TRINITY_DN89165_c1_g3	GO:0005524, ATP binding;GO:0005737, cytoplasm;GO:0005789, endoplasmic reticulum membrane;GO:0007286, spermatid development;GO:0016021, integral component of membrane;GO:0018279, protein N-linked glycosylation via asparagine;GO:0030433, ubiquitin-dependent ERAD pathway;GO:0031625, ubiquitin protein ligase binding;GO:0042534, regulation of tumor necrosis factor biosynthetic process;GO:0061630, ubiq…	K10578-ko04141 Protein processing in endoplasmic reticulum;ko04120 Ubiquitin mediated proteolysis
TRINITY_DN89165_c1_g2	-	-
TRINITY_DN85122_c0_g1	-	-
TRINITY_DN89165_c1_g4	-	-
TRINITY_DN85122_c0_g3	-	-
TRINITY_DN85122_c0_g2	GO:0005509, calcium ion binding;GO:0009733, response to auxin	-
TRINITY_DN81772_c3_g5	-	-
TRINITY_DN86281_c0_g4	-	-
TRINITY_DN218383_c0_g1	-	-
TRINITY_DN58271_c0_g1	-	-
TRINITY_DN161521_c0_g1	GO:0005622, intracellular;GO:0005765, lysosomal membrane;GO:0005768, endosome;GO:0006886, intracellular protein transport;GO:0006904, vesicle docking involved in exocytosis;GO:0007032, endosome organization;GO:0007040, lysosome organization;GO:0007634, optokinetic behavior;GO:0008333, endosome to lysosome transport;GO:0015721, bile acid and bile salt transport;GO:0016192, vesicle-mediated transpo…	-
TRINITY_DN86281_c0_g5	-	-
TRINITY_DN175419_c0_g1	-	-
TRINITY_DN73261_c0_g1	GO:0004853, uroporphyrinogen decarboxylase activity;GO:0005737, cytoplasm;GO:0006782, protoporphyrinogen IX biosynthetic process	K01599-ko00860 Porphyrin and chlorophyll metabolism
TRINITY_DN73261_c0_g2	GO:0004853, uroporphyrinogen decarboxylase activity;GO:0005737, cytoplasm;GO:0006782, protoporphyrinogen IX biosynthetic process	K01599-ko00860 Porphyrin and chlorophyll metabolism
TRINITY_DN67793_c0_g2	GO:0008270, zinc ion binding;GO:0009395, phospholipid catabolic process;GO:0031305, integral component of mitochondrial inner membrane;GO:0070290, N-acylphosphatidylethanolamine-specific phospholipase D activity;GO:0070291, N-acylethanolamine metabolic process;GO:0070292, N-acylphosphatidylethanolamine metabolic process	-
TRINITY_DN67793_c0_g1	-	-
TRINITY_DN205381_c0_g1	GO:0005634, nucleus;GO:0005739, mitochondrion;GO:0005844, polysome;GO:0006378, mRNA polyadenylation;GO:0010494, cytoplasmic stress granule;GO:0010603, regulation of cytoplasmic mRNA processing body assembly;GO:0034063, stress granule assembly;GO:0043007, maintenance of rDNA;GO:0045727, positive regulation of translation	-
TRINITY_DN197516_c0_g1	GO:0005576, extracellular region;GO:0005886, plasma membrane;GO:0016020, membrane;GO:0016021, integral component of membrane	-
TRINITY_DN122294_c0_g1	-	-
TRINITY_DN81772_c3_g1	-	-
TRINITY_DN106060_c0_g1	-	-
TRINITY_DN50399_c0_g2	-	-
TRINITY_DN50399_c0_g1	-	-
TRINITY_DN82414_c2_g1	-	-
TRINITY_DN82414_c2_g2	-	-
TRINITY_DN82414_c2_g3	-	-
TRINITY_DN82414_c2_g4	-	-
TRINITY_DN82414_c2_g5	-	-
TRINITY_DN82414_c2_g6	-	-
TRINITY_DN82414_c2_g7	-	-
TRINITY_DN82414_c2_g8	-	-
TRINITY_DN82414_c2_g9	-	-
TRINITY_DN81772_c3_g2	-	-
TRINITY_DN80104_c0_g2	GO:0003824, catalytic activity;GO:0008106, alcohol dehydrogenase (NADP+) activity;GO:0050662, coenzyme binding	-
TRINITY_DN82286_c3_g1	-	-
TRINITY_DN80104_c0_g1	GO:0003824, catalytic activity;GO:0008106, alcohol dehydrogenase (NADP+) activity;GO:0050662, coenzyme binding	-
TRINITY_DN167176_c0_g1	-	-
TRINITY_DN192954_c0_g1	GO:0003994, aconitate hydratase activity;GO:0005737, cytoplasm;GO:0006097, glyoxylate cycle;GO:0008152, metabolic process;GO:0046872, metal ion binding;GO:0051539, 4 iron, 4 sulfur cluster binding	-
TRINITY_DN138941_c0_g1	GO:0003988, acetyl-CoA C-acyltransferase activity;GO:0005777, peroxisome;GO:0006631, fatty acid metabolic process;GO:0008152, metabolic process;GO:0016747, transferase activity, transferring acyl groups other than amino-acyl groups	-
TRINITY_DN100570_c0_g1	-	-
TRINITY_DN194445_c0_g1	GO:0005506, iron ion binding;GO:0008137, NADH dehydrogenase (ubiquinone) activity;GO:0008901, ferredoxin hydrogenase activity;GO:0009055, electron carrier activity;GO:0016020, membrane;GO:0042773, ATP synthesis coupled electron transport;GO:0046872, metal ion binding;GO:0050583, hydrogen dehydrogenase (NADP+) activity;GO:0051536, iron-sulfur cluster binding;GO:0051537, 2 iron, 2 sulfur cluster bi…	-
TRINITY_DN92544_c0_g3	GO:0004127, cytidylate kinase activity;GO:0005524, ATP binding;GO:0005634, nucleus;GO:0005737, cytoplasm;GO:0006207, 'de novo' pyrimidine nucleobase biosynthetic process;GO:0006221, pyrimidine nucleotide biosynthetic process;GO:0009041, uridylate kinase activity	-
TRINITY_DN11466_c0_g1	GO:0000281, mitotic cytokinesis;GO:0005525, GTP binding;GO:0005634, nucleus;GO:0005829, cytosol;GO:0005940, septin ring;GO:0007067, mitotic nuclear division;GO:0008289, lipid binding;GO:0016020, membrane;GO:0031105, septin complex;GO:0051301, cell division	-
TRINITY_DN194784_c0_g1	-	-
TRINITY_DN196385_c0_g1	GO:0006487, protein N-linked glycosylation;GO:0008250, oligosaccharyltransferase complex;GO:0016021, integral component of membrane;GO:0016757, transferase activity, transferring glycosyl groups	-
TRINITY_DN189715_c0_g1	-	-
TRINITY_DN185093_c0_g1	GO:0006397, mRNA processing;GO:0008270, zinc ion binding;GO:0009507, chloroplast;GO:1900865, chloroplast RNA modification	-
TRINITY_DN67799_c0_g1	GO:0004801, sedoheptulose-7-phosphate:D-glyceraldehyde-3-phosphate glyceronetransferase activity;GO:0005634, nucleus;GO:0005829, cytosol;GO:0005975, carbohydrate metabolic process;GO:0006098, pentose-phosphate shunt	-
TRINITY_DN130451_c0_g1	-	-
TRINITY_DN150162_c0_g1	-	-
TRINITY_DN84037_c3_g1	-	-
TRINITY_DN112577_c0_g1	-	-
TRINITY_DN106029_c0_g1	GO:0003143, embryonic heart tube morphogenesis;GO:0005509, calcium ion binding;GO:0005634, nucleus;GO:0007368, determination of left/right symmetry;GO:0010468, regulation of gene expression;GO:0016021, integral component of membrane;GO:0030326, embryonic limb morphogenesis;GO:0030509, BMP signaling pathway;GO:0035108, limb morphogenesis;GO:0042074, cell migration involved in gastrulation;GO:00487…	-
TRINITY_DN119440_c0_g1	-	-
TRINITY_DN81747_c0_g1	-	-
TRINITY_DN82507_c2_g2	GO:0016491, oxidoreductase activity;GO:0046872, metal ion binding;GO:0051213, dioxygenase activity	-
TRINITY_DN187077_c0_g1	-	-
TRINITY_DN103887_c0_g1	-	-
TRINITY_DN198316_c0_g1	-	-
TRINITY_DN53874_c0_g1	GO:0000166, nucleotide binding;GO:0003723, RNA binding	-
TRINITY_DN83157_c2_g1	GO:0005886, plasma membrane;GO:0006071, glycerol metabolic process;GO:0006629, lipid metabolic process;GO:0008889, glycerophosphodiester phosphodiesterase activity;GO:0009505, plant-type cell wall;GO:0009932, cell tip growth;GO:0010026, trichome differentiation;GO:0010053, root epidermal cell differentiation;GO:0010442, guard cell morphogenesis;GO:0031225, anchored component of membrane;GO:004665…	-
TRINITY_DN81208_c2_g1	GO:0003824, catalytic activity;GO:0008152, metabolic process	-
TRINITY_DN81208_c2_g2	GO:0003824, catalytic activity;GO:0008152, metabolic process	-
TRINITY_DN81208_c2_g3	GO:0003824, catalytic activity;GO:0004802, transketolase activity;GO:0008152, metabolic process;GO:0046872, metal ion binding	-
TRINITY_DN81208_c2_g4	GO:0003824, catalytic activity;GO:0008152, metabolic process	-
TRINITY_DN197300_c0_g1	GO:0004177, aminopeptidase activity;GO:0004301, epoxide hydrolase activity;GO:0004463, leukotriene-A4 hydrolase activity;GO:0005634, nucleus;GO:0005654, nucleoplasm;GO:0005737, cytoplasm;GO:0005829, cytosol;GO:0005886, plasma membrane;GO:0006508, proteolysis;GO:0006691, leukotriene metabolic process;GO:0006954, inflammatory response;GO:0008233, peptidase activity;GO:0008270, zinc ion binding;GO:0…	-
TRINITY_DN178162_c0_g1	-	-
TRINITY_DN82187_c0_g3	-	-
TRINITY_DN35673_c0_g1	GO:0000151, ubiquitin ligase complex;GO:0000209, protein polyubiquitination;GO:0004842, ubiquitin-protein transferase activity;GO:0005737, cytoplasm;GO:0005829, cytosol;GO:0016021, integral component of membrane;GO:0016874, ligase activity;GO:0031624, ubiquitin conjugating enzyme binding;GO:0032436, positive regulation of proteasomal ubiquitin-dependent protein catabolic process;GO:0042787, prote…	-
TRINITY_DN167899_c0_g1	GO:0003989, acetyl-CoA carboxylase activity;GO:0006633, fatty acid biosynthetic process;GO:0009317, acetyl-CoA carboxylase complex	-
TRINITY_DN62483_c0_g1	-	-
TRINITY_DN211643_c0_g1	-	-
TRINITY_DN215856_c0_g1	GO:0004514, nicotinate-nucleotide diphosphorylase (carboxylating) activity;GO:0005634, nucleus;GO:0005737, cytoplasm;GO:0009435, NAD biosynthetic process;GO:0034213, quinolinate catabolic process;GO:0034354, 'de novo' NAD biosynthetic process from tryptophan;GO:0042802, identical protein binding	K00767-ko00760 Nicotinate and nicotinamide metabolism
TRINITY_DN195843_c0_g1	GO:0005634, nucleus;GO:0005737, cytoplasm;GO:0005829, cytosol;GO:0006221, pyrimidine nucleotide biosynthetic process;GO:0008677, 2-dehydropantoate 2-reductase activity;GO:0015940, pantothenate biosynthetic process;GO:0050661, NADP binding	-
TRINITY_DN93978_c1_g10	-	-
TRINITY_DN183455_c0_g1	GO:0003677, DNA binding;GO:0006351, transcription, DNA-templated;GO:0006355, regulation of transcription, DNA-templated	-
TRINITY_DN209662_c0_g1	-	-
TRINITY_DN93978_c1_g11	-	-
TRINITY_DN187583_c0_g1	GO:0001848, complement binding;GO:0004252, serine-type endopeptidase activity;GO:0004866, endopeptidase inhibitor activity;GO:0005576, extracellular region;GO:0005615, extracellular space;GO:0005886, plasma membrane;GO:0006954, inflammatory response;GO:0006956, complement activation;GO:0006958, complement activation, classical pathway;GO:0008228, opsonization;GO:0030246, carbohydrate binding;GO:0…	-
TRINITY_DN199873_c0_g1	-	-
TRINITY_DN169421_c0_g1	GO:0005737, cytoplasm;GO:0006914, autophagy;GO:0015031, protein transport;GO:0016020, membrane;GO:0016126, sterol biosynthetic process;GO:0016906, sterol 3-beta-glucosyltransferase activity;GO:0030259, lipid glycosylation	-
TRINITY_DN165210_c0_g1	GO:0009055, electron carrier activity;GO:0016021, integral component of membrane;GO:0022904, respiratory electron transport chain	-
TRINITY_DN94399_c1_g1	GO:0000943, retrotransposon nucleocapsid;GO:0003676, nucleic acid binding;GO:0003723, RNA binding;GO:0003887, DNA-directed DNA polymerase activity;GO:0003964, RNA-directed DNA polymerase activity;GO:0004540, ribonuclease activity;GO:0008233, peptidase activity;GO:0015074, DNA integration;GO:0032197, transposition, RNA-mediated	-
TRINITY_DN94399_c1_g2	-	-
TRINITY_DN94399_c1_g3	GO:0000184, nuclear-transcribed mRNA catabolic process, nonsense-mediated decay;GO:0003723, RNA binding;GO:0005730, nucleolus;GO:0005737, cytoplasm;GO:0009611, response to wounding;GO:0009863, salicylic acid mediated signaling pathway;GO:0009867, jasmonic acid mediated signaling pathway;GO:0042742, defense response to bacterium;GO:0048471, perinuclear region of cytoplasm;GO:0048571, long-day phot…	K14327-ko03015 mRNA surveillance pathway;ko03013 RNA transport
TRINITY_DN94399_c1_g4	-	-
TRINITY_DN31120_c0_g1	GO:0003974, UDP-N-acetylglucosamine 4-epimerase activity;GO:0003978, UDP-glucose 4-epimerase activity;GO:0019388, galactose catabolic process;GO:0050662, coenzyme binding;GO:0070062, extracellular exosome	-
TRINITY_DN73345_c0_g1	GO:0034605, cellular response to heat;GO:0097308, cellular response to farnesol	-
TRINITY_DN94399_c1_g7	-	-
TRINITY_DN67983_c0_g1	GO:0003871, 5-methyltetrahydropteroyltriglutamate-homocysteine S-methyltransferase activity;GO:0005576, extracellular region;GO:0005634, nucleus;GO:0005737, cytoplasm;GO:0005829, cytosol;GO:0006534, cysteine metabolic process;GO:0008270, zinc ion binding;GO:0008705, methionine synthase activity;GO:0019280, L-methionine biosynthetic process from homoserine via O-acetyl-L-homoserine and cystathioni…	-
TRINITY_DN68855_c0_g1	-	-
TRINITY_DN79830_c0_g1	-	-
TRINITY_DN140341_c0_g1	GO:0005634, nucleus;GO:0005829, cytosol;GO:0007165, signal transduction;GO:0015630, microtubule cytoskeleton;GO:0030674, protein binding, bridging;GO:0030950, establishment or maintenance of actin cytoskeleton polarity;GO:0031500, Tea1 cell-end complex;GO:0034613, cellular protein localization;GO:0035839, non-growing cell tip;GO:0035840, old growing cell tip;GO:0051285, cell cortex of cell tip;GO…	-
TRINITY_DN184401_c0_g1	GO:0000287, magnesium ion binding;GO:0004417, hydroxyethylthiazole kinase activity;GO:0004789, thiamine-phosphate diphosphorylase activity;GO:0005524, ATP binding;GO:0009228, thiamine biosynthetic process;GO:0009229, thiamine diphosphate biosynthetic process	-
TRINITY_DN124866_c0_g1	-	-
TRINITY_DN217637_c0_g1	-	-
TRINITY_DN24278_c0_g1	GO:0008806, carboxymethylenebutenolidase activity;GO:0016021, integral component of membrane;GO:0016628, oxidoreductase activity, acting on the CH-CH group of donors, NAD or NADP as acceptor;GO:0016787, hydrolase activity	-
TRINITY_DN147838_c0_g1	GO:0004601, peroxidase activity	-
TRINITY_DN74018_c0_g1	GO:0005313, L-glutamate transmembrane transporter activity;GO:0005886, plasma membrane;GO:0005887, integral component of plasma membrane;GO:0006865, amino acid transport;GO:0015171, amino acid transmembrane transporter activity;GO:0015183, L-aspartate transmembrane transporter activity;GO:0015297, antiporter activity;GO:0016021, integral component of membrane;GO:0089711, L-glutamate transmembrane…	-
TRINITY_DN110035_c0_g1	-	-
TRINITY_DN89577_c0_g2	GO:0005618, cell wall;GO:0005737, cytoplasm;GO:0005886, plasma membrane;GO:0008610, lipid biosynthetic process;GO:0008757, S-adenosylmethionine-dependent methyltransferase activity;GO:0016491, oxidoreductase activity;GO:0032259, methylation	-
TRINITY_DN89577_c0_g1	GO:0005737, cytoplasm;GO:0006633, fatty acid biosynthetic process;GO:0008757, S-adenosylmethionine-dependent methyltransferase activity;GO:0016491, oxidoreductase activity;GO:0032259, methylation;GO:0071555, cell wall organization	-
TRINITY_DN102333_c0_g1	-	-
TRINITY_DN66820_c0_g1	-	-
TRINITY_DN195190_c0_g1	-	-
TRINITY_DN192027_c0_g1	GO:0016021, integral component of membrane	-
TRINITY_DN82293_c0_g1	-	-
TRINITY_DN126790_c0_g1	GO:0004022, alcohol dehydrogenase (NAD) activity;GO:0005737, cytoplasm;GO:0008270, zinc ion binding;GO:0016491, oxidoreductase activity	-
TRINITY_DN64374_c0_g1	-	-
TRINITY_DN213677_c0_g1	GO:0005737, cytoplasm	-
TRINITY_DN103802_c0_g1	-	-
TRINITY_DN183253_c0_g1	-	-
TRINITY_DN86012_c0_g1	-	-
TRINITY_DN165178_c0_g1	-	-
TRINITY_DN77770_c0_g3	-	-
TRINITY_DN77770_c0_g2	-	-
TRINITY_DN77770_c0_g1	-	-
TRINITY_DN92619_c6_g1	-	-
TRINITY_DN79044_c0_g1	GO:0016021, integral component of membrane	-
TRINITY_DN180789_c0_g1	-	-
TRINITY_DN167422_c0_g1	-	-
TRINITY_DN219381_c0_g1	-	-
TRINITY_DN94724_c1_g4	GO:0000394, RNA splicing, via endonucleolytic cleavage and ligation;GO:0003690, double-stranded DNA binding;GO:0003723, RNA binding;GO:0005739, mitochondrion;GO:0006353, DNA-templated transcription, termination;GO:0006355, regulation of transcription, DNA-templated	-
TRINITY_DN94724_c1_g5	-	-
TRINITY_DN94724_c1_g6	GO:0003896, DNA primase activity;GO:1990077, primosome complex	-
TRINITY_DN50831_c0_g1	-	-
TRINITY_DN94724_c1_g1	-	-
TRINITY_DN94724_c1_g2	GO:0005886, plasma membrane;GO:0009506, plasmodesma;GO:0016021, integral component of membrane	-
TRINITY_DN94724_c1_g3	GO:0000394, RNA splicing, via endonucleolytic cleavage and ligation;GO:0003690, double-stranded DNA binding;GO:0003723, RNA binding;GO:0005739, mitochondrion;GO:0006353, DNA-templated transcription, termination;GO:0006355, regulation of transcription, DNA-templated	-
TRINITY_DN95179_c1_g7	GO:0005737, cytoplasm;GO:0016021, integral component of membrane;GO:0016491, oxidoreductase activity;GO:0033512, L-lysine catabolic process to acetyl-CoA via saccharopine;GO:0047130, saccharopine dehydrogenase (NADP+, L-lysine-forming) activity;GO:0047131, saccharopine dehydrogenase (NAD+, L-glutamate-forming) activity	K14157-ko00310 Lysine degradation
TRINITY_DN95179_c1_g6	GO:0005737, cytoplasm;GO:0033512, L-lysine catabolic process to acetyl-CoA via saccharopine;GO:0047130, saccharopine dehydrogenase (NADP+, L-lysine-forming) activity;GO:0047131, saccharopine dehydrogenase (NAD+, L-glutamate-forming) activity	-
TRINITY_DN95179_c1_g5	-	-
TRINITY_DN95179_c1_g4	-	-
TRINITY_DN95179_c1_g3	-	-
TRINITY_DN95179_c1_g2	GO:0005737, cytoplasm;GO:0016021, integral component of membrane;GO:0016491, oxidoreductase activity;GO:0033512, L-lysine catabolic process to acetyl-CoA via saccharopine;GO:0047130, saccharopine dehydrogenase (NADP+, L-lysine-forming) activity;GO:0047131, saccharopine dehydrogenase (NAD+, L-glutamate-forming) activity	K14157-ko00310 Lysine degradation
TRINITY_DN95179_c1_g1	GO:0004755, saccharopine dehydrogenase (NADP+, L-glutamate-forming) activity;GO:0005737, cytoplasm;GO:0016021, integral component of membrane;GO:0033512, L-lysine catabolic process to acetyl-CoA via saccharopine;GO:0047130, saccharopine dehydrogenase (NADP+, L-lysine-forming) activity;GO:0047131, saccharopine dehydrogenase (NAD+, L-glutamate-forming) activity	-
TRINITY_DN95179_c1_g9	GO:0005737, cytoplasm;GO:0016491, oxidoreductase activity;GO:0033512, L-lysine catabolic process to acetyl-CoA via saccharopine;GO:0047130, saccharopine dehydrogenase (NADP+, L-lysine-forming) activity;GO:0047131, saccharopine dehydrogenase (NAD+, L-glutamate-forming) activity	-
TRINITY_DN95179_c1_g8	GO:0004755, saccharopine dehydrogenase (NADP+, L-glutamate-forming) activity;GO:0005737, cytoplasm;GO:0016021, integral component of membrane;GO:0033512, L-lysine catabolic process to acetyl-CoA via saccharopine;GO:0047130, saccharopine dehydrogenase (NADP+, L-lysine-forming) activity;GO:0047131, saccharopine dehydrogenase (NAD+, L-glutamate-forming) activity	K14157-ko00310 Lysine degradation
TRINITY_DN89702_c2_g3	-	-
TRINITY_DN89702_c2_g2	-	-
TRINITY_DN96549_c1_g1	-	-
TRINITY_DN89702_c2_g6	-	-
TRINITY_DN89702_c2_g5	-	-
TRINITY_DN89702_c2_g4	-	-
TRINITY_DN45569_c1_g1	-	-
TRINITY_DN60711_c0_g1	-	-
TRINITY_DN85916_c1_g1	GO:0003677, DNA binding;GO:0003700, transcription factor activity, sequence-specific DNA binding;GO:0005886, plasma membrane;GO:0006355, regulation of transcription, DNA-templated;GO:0006979, response to oxidative stress;GO:0046872, metal ion binding	-
TRINITY_DN57593_c0_g1	-	-
TRINITY_DN69716_c0_g1	GO:0005739, mitochondrion;GO:0008152, metabolic process;GO:0016787, hydrolase activity	-
TRINITY_DN104505_c0_g1	GO:0002229, defense response to oomycetes;GO:0004674, protein serine/threonine kinase activity;GO:0005524, ATP binding;GO:0005773, vacuole;GO:0005886, plasma membrane;GO:0016021, integral component of membrane;GO:0030246, carbohydrate binding;GO:0042742, defense response to bacterium	-
TRINITY_DN181213_c0_g1	GO:0016021, integral component of membrane	-
TRINITY_DN84446_c0_g1	GO:0003999, adenine phosphoribosyltransferase activity;GO:0005737, cytoplasm;GO:0006168, adenine salvage;GO:0044209, AMP salvage	-
TRINITY_DN123677_c0_g1	-	-
TRINITY_DN84446_c0_g3	-	-
TRINITY_DN84446_c0_g2	GO:0003676, nucleic acid binding;GO:0004813, alanine-tRNA ligase activity;GO:0005524, ATP binding;GO:0006419, alanyl-tRNA aminoacylation;GO:0008270, zinc ion binding;GO:0015074, DNA integration	-
TRINITY_DN158268_c0_g1	GO:0000166, nucleotide binding;GO:0003676, nucleic acid binding;GO:0005685, U1 snRNP;GO:0005829, cytosol;GO:0006397, mRNA processing	-
TRINITY_DN181936_c0_g1	GO:0005739, mitochondrion	-
TRINITY_DN164989_c0_g1	GO:0003677, DNA binding;GO:0006355, regulation of transcription, DNA-templated;GO:0008270, zinc ion binding	-
TRINITY_DN216199_c0_g1	-	-
TRINITY_DN94321_c1_g1	-	-
TRINITY_DN187403_c0_g1	GO:0004674, protein serine/threonine kinase activity;GO:0005085, guanyl-nucleotide exchange factor activity;GO:0005089, Rho guanyl-nucleotide exchange factor activity;GO:0005524, ATP binding;GO:0005829, cytosol;GO:0007185, transmembrane receptor protein tyrosine phosphatase signaling pathway;GO:0035023, regulation of Rho protein signal transduction;GO:0043065, positive regulation of apoptotic pro…	-
TRINITY_DN172611_c0_g1	GO:0004364, glutathione transferase activity;GO:0005737, cytoplasm;GO:0006559, L-phenylalanine catabolic process;GO:0006572, tyrosine catabolic process;GO:0006749, glutathione metabolic process;GO:0009072, aromatic amino acid family metabolic process;GO:0016034, maleylacetoacetate isomerase activity;GO:0016853, isomerase activity;GO:0042802, identical protein binding	-
TRINITY_DN63993_c0_g1	GO:0003214, cardiac left ventricle morphogenesis;GO:0004180, carboxypeptidase activity;GO:0004181, metallocarboxypeptidase activity;GO:0004185, serine-type carboxypeptidase activity;GO:0005615, extracellular space;GO:0005794, Golgi apparatus;GO:0008270, zinc ion binding;GO:0016055, Wnt signaling pathway;GO:0030070, insulin processing;GO:0030141, secretory granule;GO:0030658, transport vesicle mem…	-
TRINITY_DN214942_c0_g1	GO:0000002, mitochondrial genome maintenance;GO:0000166, nucleotide binding;GO:0003676, nucleic acid binding;GO:0003723, RNA binding;GO:0005737, cytoplasm;GO:0006397, mRNA processing;GO:0031305, integral component of mitochondrial inner membrane	-
TRINITY_DN71103_c0_g1	-	-
TRINITY_DN71103_c0_g2	GO:0005178, integrin binding;GO:0005769, early endosome;GO:0005829, cytosol;GO:0005886, plasma membrane;GO:0006006, glucose metabolic process;GO:0006915, apoptotic process;GO:0008217, regulation of blood pressure;GO:0016601, Rac protein signal transduction;GO:0030036, actin cytoskeleton organization;GO:0030336, negative regulation of cell migration;GO:0032228, regulation of synaptic transmission,…	-
TRINITY_DN187665_c0_g1	GO:0003677, DNA binding;GO:0005524, ATP binding;GO:0005694, chromosome;GO:0005737, cytoplasm;GO:0006260, DNA replication;GO:0007062, sister chromatid cohesion;GO:0030261, chromosome condensation	-
TRINITY_DN186510_c0_g1	-	-
TRINITY_DN192400_c0_g1	GO:0004022, alcohol dehydrogenase (NAD) activity;GO:0005829, cytosol;GO:0006066, alcohol metabolic process;GO:0006091, generation of precursor metabolites and energy;GO:0008270, zinc ion binding;GO:0016491, oxidoreductase activity	-
TRINITY_DN125659_c0_g1	-	-
TRINITY_DN18498_c0_g1	-	-
TRINITY_DN163718_c0_g1	GO:0005634, nucleus;GO:0005829, cytosol;GO:0016787, hydrolase activity	-
TRINITY_DN78392_c0_g1	-	-
TRINITY_DN166598_c0_g1	-	-
TRINITY_DN456_c0_g1	GO:0016787, hydrolase activity	-
TRINITY_DN60170_c0_g1	-	-
TRINITY_DN26561_c0_g1	GO:0003723, RNA binding;GO:0003729, mRNA binding;GO:0005634, nucleus;GO:0005737, cytoplasm;GO:0005844, polysome;GO:0007517, muscle organ development;GO:0017148, negative regulation of translation;GO:0030154, cell differentiation;GO:0033592, RNA strand annealing activity;GO:0042803, protein homodimerization activity;GO:0046982, protein heterodimerization activity;GO:2000637, positive regulation of…	-
TRINITY_DN123767_c0_g1	-	-
TRINITY_DN112333_c0_g1	GO:0016491, oxidoreductase activity;GO:0046872, metal ion binding;GO:0051537, 2 iron, 2 sulfur cluster binding	-
TRINITY_DN83354_c1_g5	-	-
TRINITY_DN83354_c1_g4	-	-
TRINITY_DN94471_c3_g1	GO:0000139, Golgi membrane;GO:0016021, integral component of membrane;GO:0016760, cellulose synthase (UDP-forming) activity;GO:0030244, cellulose biosynthetic process;GO:0071555, cell wall organization	-
TRINITY_DN130208_c0_g1	GO:0005524, ATP binding;GO:0005743, mitochondrial inner membrane;GO:0015421, oligopeptide-transporting ATPase activity;GO:0016021, integral component of membrane;GO:0042626, ATPase activity, coupled to transmembrane movement of substances;GO:0055085, transmembrane transport;GO:0070301, cellular response to hydrogen peroxide;GO:0090374, oligopeptide export from mitochondrion	-
TRINITY_DN83354_c1_g1	GO:0003677, DNA binding;GO:0003700, transcription factor activity, sequence-specific DNA binding;GO:0005634, nucleus;GO:0007275, multicellular organism development;GO:0009909, regulation of flower development;GO:0009933, meristem structural organization;GO:0009944, polarity specification of adaxial/abaxial axis;GO:0010093, specification of floral organ identity;GO:0010154, fruit development;GO:00…	-
TRINITY_DN152647_c0_g1	GO:0003677, DNA binding;GO:0003899, DNA-directed 5'-3' RNA polymerase activity;GO:0006351, transcription, DNA-templated	-
TRINITY_DN83354_c1_g3	GO:0004180, carboxypeptidase activity;GO:0004185, serine-type carboxypeptidase activity;GO:0005576, extracellular region;GO:0016747, transferase activity, transferring acyl groups other than amino-acyl groups;GO:0019748, secondary metabolic process	-
TRINITY_DN83354_c1_g2	-	-
TRINITY_DN93317_c3_g1	-	-
TRINITY_DN95175_c2_g3	-	-
TRINITY_DN61984_c0_g1	-	-
TRINITY_DN95175_c2_g1	-	-
TRINITY_DN90507_c1_g1	GO:0004864, protein phosphatase inhibitor activity;GO:0009966, regulation of signal transduction;GO:0043666, regulation of phosphoprotein phosphatase activity	-
TRINITY_DN95175_c2_g4	-	-
TRINITY_DN127448_c0_g1	-	-
TRINITY_DN125211_c0_g1	GO:0003873, 6-phosphofructo-2-kinase activity;GO:0005524, ATP binding;GO:0005737, cytoplasm;GO:0006000, fructose metabolic process;GO:0006003, fructose 2,6-bisphosphate metabolic process;GO:0006110, regulation of glycolytic process	-
TRINITY_DN156365_c0_g1	-	-
TRINITY_DN176297_c0_g1	GO:0003677, DNA binding;GO:0006351, transcription, DNA-templated;GO:0006355, regulation of transcription, DNA-templated	-
TRINITY_DN216622_c0_g1	-	-
TRINITY_DN63868_c0_g1	GO:0005779, integral component of peroxisomal membrane;GO:0016559, peroxisome fission	-
TRINITY_DN98169_c0_g1	-	-
TRINITY_DN33260_c0_g1	-	-
TRINITY_DN146362_c0_g1	-	-
TRINITY_DN109135_c0_g1	GO:0000226, microtubule cytoskeleton organization;GO:0005524, ATP binding;GO:0005634, nucleus;GO:0006457, protein folding;GO:0009408, response to heat;GO:0046872, metal ion binding;GO:1900035, negative regulation of cellular response to heat	-
TRINITY_DN202004_c0_g1	-	-
TRINITY_DN106999_c0_g1	-	-
TRINITY_DN197073_c0_g1	GO:0004371, glycerone kinase activity;GO:0005829, cytosol;GO:0006974, cellular response to DNA damage stimulus;GO:0019563, glycerol catabolic process;GO:0042182, ketone catabolic process;GO:0046365, monosaccharide catabolic process;GO:0047324, phosphoenolpyruvate-glycerone phosphotransferase activity	-
TRINITY_DN32427_c0_g1	-	-
TRINITY_DN187325_c0_g1	-	-
TRINITY_DN176277_c0_g1	GO:0008643, carbohydrate transport;GO:0016021, integral component of membrane;GO:0022891, substrate-specific transmembrane transporter activity	-
TRINITY_DN93184_c1_g10	GO:0003700, transcription factor activity, sequence-specific DNA binding;GO:0005634, nucleus;GO:0006351, transcription, DNA-templated;GO:0043565, sequence-specific DNA binding	-
TRINITY_DN216407_c0_g1	-	-
TRINITY_DN133765_c0_g1	-	-
TRINITY_DN184564_c0_g1	GO:0003824, catalytic activity;GO:0004300, enoyl-CoA hydratase activity;GO:0005739, mitochondrion;GO:0006635, fatty acid beta-oxidation;GO:0008152, metabolic process;GO:0008233, peptidase activity	-
TRINITY_DN165055_c0_g1	GO:0000151, ubiquitin ligase complex;GO:0004842, ubiquitin-protein transferase activity;GO:0005622, intracellular;GO:0005634, nucleus;GO:0005737, cytoplasm;GO:0016567, protein ubiquitination;GO:0031625, ubiquitin protein ligase binding;GO:0035556, intracellular signal transduction	-
TRINITY_DN119488_c0_g1	GO:0000387, spliceosomal snRNP assembly;GO:0000398, mRNA splicing, via spliceosome;GO:0003723, RNA binding;GO:0005634, nucleus;GO:0005681, spliceosomal complex;GO:0005682, U5 snRNP;GO:0005685, U1 snRNP;GO:0005686, U2 snRNP;GO:0005687, U4 snRNP;GO:0005829, cytosol;GO:0019013, viral nucleocapsid;GO:0030532, small nuclear ribonucleoprotein complex;GO:0046540, U4/U6 x U5 tri-snRNP complex;GO:0071004,…	-
TRINITY_DN180915_c0_g1	-	-
TRINITY_DN212272_c0_g1	GO:0005385, zinc ion transmembrane transporter activity;GO:0005774, vacuolar membrane;GO:0008324, cation transmembrane transporter activity;GO:0010043, response to zinc ion;GO:0010486, manganese:proton antiporter activity;GO:0016020, membrane;GO:0016021, integral component of membrane;GO:0061088, regulation of sequestering of zinc ion	-
TRINITY_DN106304_c0_g1	-	-
TRINITY_DN83080_c0_g2	GO:0000977, RNA polymerase II regulatory region sequence-specific DNA binding;GO:0003700, transcription factor activity, sequence-specific DNA binding;GO:0005634, nucleus;GO:0006357, regulation of transcription from RNA polymerase II promoter	-
TRINITY_DN83080_c0_g1	GO:0003677, DNA binding	-
TRINITY_DN200433_c0_g1	GO:0005778, peroxisomal membrane;GO:0007031, peroxisome organization;GO:0016021, integral component of membrane	-
TRINITY_DN184949_c0_g1	GO:0016021, integral component of membrane	-
TRINITY_DN24735_c0_g1	GO:0005886, plasma membrane;GO:0016021, integral component of membrane	-
TRINITY_DN91887_c0_g2	GO:0003677, DNA binding;GO:0005634, nucleus;GO:0006338, chromatin remodeling;GO:0006351, transcription, DNA-templated;GO:0006355, regulation of transcription, DNA-templated;GO:0007275, multicellular organism development;GO:0016514, SWI/SNF complex	-
TRINITY_DN101340_c0_g1	-	-
TRINITY_DN91887_c0_g1	-	-
TRINITY_DN95456_c0_g1	-	-
TRINITY_DN114509_c0_g1	-	-
TRINITY_DN194641_c0_g1	GO:0004043, L-aminoadipate-semialdehyde dehydrogenase activity;GO:0005829, cytosol;GO:0019878, lysine biosynthetic process via aminoadipic acid;GO:0031177, phosphopantetheine binding;GO:1902987, negative regulation of lysine biosynthetic process via aminoadipic acid	-
TRINITY_DN73535_c0_g1	GO:0000139, Golgi membrane;GO:0000271, polysaccharide biosynthetic process;GO:0005768, endosome;GO:0005794, Golgi apparatus;GO:0005802, trans-Golgi network;GO:0010411, xyloglucan metabolic process;GO:0016021, integral component of membrane;GO:0016757, transferase activity, transferring glycosyl groups;GO:0033843, xyloglucan 6-xylosyltransferase activity;GO:0035252, UDP-xylosyltransferase activity	-
TRINITY_DN167567_c0_g1	GO:0004176, ATP-dependent peptidase activity;GO:0004222, metalloendopeptidase activity;GO:0005524, ATP binding;GO:0005739, mitochondrion;GO:0005743, mitochondrial inner membrane;GO:0006461, protein complex assembly;GO:0007409, axonogenesis;GO:0007528, neuromuscular junction development;GO:0008053, mitochondrial fusion;GO:0008237, metallopeptidase activity;GO:0008270, zinc ion binding;GO:0016021, …	-
TRINITY_DN95012_c0_g4	GO:0005886, plasma membrane;GO:0006629, lipid metabolic process;GO:0006952, defense response;GO:0016021, integral component of membrane;GO:0043447, alkane biosynthetic process;GO:0048316, seed development	-
TRINITY_DN95012_c0_g5	-	-
TRINITY_DN95012_c0_g6	GO:0005886, plasma membrane;GO:0006629, lipid metabolic process;GO:0006952, defense response;GO:0016021, integral component of membrane;GO:0043447, alkane biosynthetic process;GO:0048316, seed development	-
TRINITY_DN185147_c0_g1	-	-
TRINITY_DN95012_c0_g1	GO:0005886, plasma membrane;GO:0006629, lipid metabolic process;GO:0006952, defense response;GO:0016021, integral component of membrane;GO:0043447, alkane biosynthetic process;GO:0048316, seed development	-
TRINITY_DN95012_c0_g2	-	-
TRINITY_DN95012_c0_g3	GO:0005886, plasma membrane;GO:0006629, lipid metabolic process;GO:0006723, cuticle hydrocarbon biosynthetic process;GO:0006952, defense response;GO:0009793, embryo development ending in seed dormancy;GO:0016021, integral component of membrane;GO:0043447, alkane biosynthetic process;GO:0048316, seed development	-
TRINITY_DN93738_c4_g5	-	-
TRINITY_DN93738_c4_g4	-	-
TRINITY_DN93738_c4_g7	-	-
TRINITY_DN93738_c4_g6	-	-
TRINITY_DN93738_c4_g1	-	-
TRINITY_DN108216_c0_g1	GO:0000166, nucleotide binding;GO:0000398, mRNA splicing, via spliceosome;GO:0005634, nucleus;GO:0005681, spliceosomal complex;GO:0005685, U1 snRNP;GO:0005730, nucleolus;GO:0005829, cytosol;GO:0017069, snRNA binding;GO:0030619, U1 snRNA binding;GO:0035614, snRNA stem-loop binding	-
TRINITY_DN93738_c4_g3	-	-
TRINITY_DN93738_c4_g2	-	-
TRINITY_DN141303_c0_g1	GO:0005096, GTPase activator activity;GO:0005622, intracellular;GO:0006886, intracellular protein transport;GO:0012505, endomembrane system;GO:0017137, Rab GTPase binding;GO:0030054, cell junction;GO:0031338, regulation of vesicle fusion;GO:0031410, cytoplasmic vesicle;GO:0043547, positive regulation of GTPase activity;GO:0045296, cadherin binding;GO:0090630, activation of GTPase activity	-
TRINITY_DN81944_c1_g1	-	-
TRINITY_DN177486_c0_g1	GO:0003676, nucleic acid binding;GO:0004815, aspartate-tRNA ligase activity;GO:0005524, ATP binding;GO:0005737, cytoplasm;GO:0006422, aspartyl-tRNA aminoacylation	-
TRINITY_DN17672_c0_g1	-	-
TRINITY_DN147773_c0_g1	-	-
TRINITY_DN130507_c0_g1	-	-
TRINITY_DN89134_c0_g4	-	-
TRINITY_DN106151_c0_g1	GO:0004754, saccharopine dehydrogenase (NAD+, L-lysine-forming) activity;GO:0019878, lysine biosynthetic process via aminoadipic acid	-
TRINITY_DN80078_c0_g1	GO:0005215, transporter activity;GO:0005622, intracellular;GO:0005737, cytoplasm;GO:0005886, plasma membrane;GO:0006810, transport;GO:0007049, cell cycle;GO:0008289, lipid binding;GO:0016021, integral component of membrane;GO:0051301, cell division	-
TRINITY_DN132126_c0_g1	GO:0004553, hydrolase activity, hydrolyzing O-glycosyl compounds;GO:0005975, carbohydrate metabolic process	-
TRINITY_DN91457_c2_g1	-	-
TRINITY_DN76200_c0_g1	GO:0004341, gluconolactonase activity;GO:0042597, periplasmic space;GO:0046178, D-gluconate biosynthetic process	-
TRINITY_DN195323_c0_g1	-	-
TRINITY_DN105837_c0_g1	-	-
TRINITY_DN17627_c0_g1	GO:0004065, arylsulfatase activity;GO:0008152, metabolic process;GO:0042597, periplasmic space;GO:0046872, metal ion binding	-
TRINITY_DN155708_c0_g1	GO:0016021, integral component of membrane	-
TRINITY_DN33161_c0_g1	-	-
TRINITY_DN83838_c1_g1	GO:0004672, protein kinase activity;GO:0005524, ATP binding;GO:0005886, plasma membrane;GO:0009505, plant-type cell wall;GO:0009506, plasmodesma;GO:0016021, integral component of membrane	-
TRINITY_DN153824_c0_g1	-	-
TRINITY_DN114681_c0_g1	-	-
TRINITY_DN197024_c0_g1	-	-
TRINITY_DN135809_c0_g1	GO:0004001, adenosine kinase activity;GO:0005524, ATP binding;GO:0005634, nucleus;GO:0005829, cytosol;GO:0006144, purine nucleobase metabolic process;GO:0006166, purine ribonucleoside salvage;GO:0044209, AMP salvage	-
TRINITY_DN94203_c1_g1	GO:0003676, nucleic acid binding;GO:0003824, catalytic activity;GO:0005524, ATP binding;GO:0005739, mitochondrion;GO:0015074, DNA integration	-
TRINITY_DN121164_c0_g1	-	-
TRINITY_DN119583_c0_g1	-	-
TRINITY_DN146218_c0_g1	-	-
TRINITY_DN90275_c0_g8	GO:0005975, carbohydrate metabolic process;GO:0016853, isomerase activity;GO:0030246, carbohydrate binding;GO:0047938, glucose-6-phosphate 1-epimerase activity	-
TRINITY_DN90275_c0_g9	GO:0016021, integral component of membrane	-
TRINITY_DN116043_c0_g1	-	-
TRINITY_DN202308_c0_g1	-	-
TRINITY_DN178866_c0_g1	GO:0016021, integral component of membrane	-
TRINITY_DN90275_c0_g1	GO:0005975, carbohydrate metabolic process;GO:0016853, isomerase activity;GO:0030246, carbohydrate binding;GO:0047938, glucose-6-phosphate 1-epimerase activity	-
TRINITY_DN90275_c0_g2	GO:0005975, carbohydrate metabolic process;GO:0016853, isomerase activity;GO:0030246, carbohydrate binding;GO:0047938, glucose-6-phosphate 1-epimerase activity	-
TRINITY_DN90275_c0_g3	-	-
TRINITY_DN69362_c0_g1	-	-
TRINITY_DN90275_c0_g5	-	-
TRINITY_DN90275_c0_g6	GO:0005975, carbohydrate metabolic process;GO:0016853, isomerase activity;GO:0030246, carbohydrate binding;GO:0047938, glucose-6-phosphate 1-epimerase activity	-
TRINITY_DN90275_c0_g7	-	-
TRINITY_DN88770_c0_g1	-	-
TRINITY_DN173402_c0_g1	-	-
TRINITY_DN75680_c0_g1	GO:0003676, nucleic acid binding;GO:0003964, RNA-directed DNA polymerase activity;GO:0004190, aspartic-type endopeptidase activity;GO:0004519, endonuclease activity;GO:0004523, RNA-DNA hybrid ribonuclease activity;GO:0015074, DNA integration	-
TRINITY_DN143237_c0_g1	-	-
TRINITY_DN100168_c0_g1	GO:0004731, purine-nucleoside phosphorylase activity;GO:0009116, nucleoside metabolic process	-
TRINITY_DN135101_c0_g1	GO:0004336, galactosylceramidase activity;GO:0005764, lysosome;GO:0005975, carbohydrate metabolic process;GO:0006683, galactosylceramide catabolic process	-
TRINITY_DN100274_c0_g1	GO:0005737, cytoplasm;GO:0030798, trans-aconitate 2-methyltransferase activity	-
TRINITY_DN89679_c1_g1	-	-
TRINITY_DN89679_c1_g3	-	-
TRINITY_DN89679_c1_g2	GO:0003676, nucleic acid binding;GO:0004190, aspartic-type endopeptidase activity;GO:0005634, nucleus;GO:0015074, DNA integration	-
TRINITY_DN81436_c4_g1	GO:0000786, nucleosome;GO:0000812, Swr1 complex;GO:0003677, DNA binding;GO:0005634, nucleus;GO:0005739, mitochondrion;GO:0006353, DNA-templated transcription, termination;GO:0031011, Ino80 complex;GO:0043486, histone exchange;GO:0045892, negative regulation of transcription, DNA-templated	-
TRINITY_DN24003_c0_g1	GO:0003697, single-stranded DNA binding;GO:0005524, ATP binding;GO:0005737, cytoplasm;GO:0006260, DNA replication;GO:0006281, DNA repair;GO:0009432, SOS response	-
TRINITY_DN63489_c0_g1	GO:0003980, UDP-glucose:glycoprotein glucosyltransferase activity;GO:0005788, endoplasmic reticulum lumen;GO:0006486, protein glycosylation	-
TRINITY_DN57013_c0_g1	-	-
TRINITY_DN8692_c0_g1	GO:0004618, phosphoglycerate kinase activity;GO:0005524, ATP binding;GO:0005634, nucleus;GO:0005737, cytoplasm;GO:0005739, mitochondrion;GO:0006094, gluconeogenesis;GO:0006096, glycolytic process;GO:0016021, integral component of membrane	-
TRINITY_DN96688_c2_g5	GO:0004553, hydrolase activity, hydrolyzing O-glycosyl compounds;GO:0005778, peroxisomal membrane;GO:0005975, carbohydrate metabolic process;GO:0006144, purine nucleobase metabolic process;GO:0008422, beta-glucosidase activity;GO:0016021, integral component of membrane;GO:0019628, urate catabolic process;GO:0033971, hydroxyisourate hydrolase activity;GO:1901657, glycosyl compound metabolic process	-
TRINITY_DN96688_c2_g6	-	-
TRINITY_DN96688_c2_g7	-	-
TRINITY_DN96688_c2_g1	GO:0004553, hydrolase activity, hydrolyzing O-glycosyl compounds;GO:0005975, carbohydrate metabolic process;GO:0008422, beta-glucosidase activity;GO:0102483, scopolin beta-glucosidase activity;GO:1901657, glycosyl compound metabolic process	K01188-ko00940 Phenylpropanoid biosynthesis;ko00460 Cyanoamino acid metabolism;ko00500 Starch and sucrose metabolism
TRINITY_DN96688_c2_g2	GO:0004553, hydrolase activity, hydrolyzing O-glycosyl compounds;GO:0005975, carbohydrate metabolic process;GO:0008422, beta-glucosidase activity;GO:0102483, scopolin beta-glucosidase activity;GO:1901657, glycosyl compound metabolic process	-
TRINITY_DN96688_c2_g3	GO:0005975, carbohydrate metabolic process;GO:0008422, beta-glucosidase activity;GO:0102483, scopolin beta-glucosidase activity;GO:1901657, glycosyl compound metabolic process	-
TRINITY_DN184309_c0_g1	-	-
TRINITY_DN85448_c0_g1	-	-
TRINITY_DN82301_c3_g4	-	-
TRINITY_DN85448_c0_g3	GO:0005777, peroxisome;GO:0006635, fatty acid beta-oxidation;GO:0009735, response to cytokinin;GO:0009845, seed germination;GO:0032365, intracellular lipid transport;GO:0046487, glyoxylate metabolic process	-
TRINITY_DN59857_c0_g1	GO:0000272, polysaccharide catabolic process;GO:0004568, chitinase activity;GO:0005975, carbohydrate metabolic process;GO:0006032, chitin catabolic process;GO:0006952, defense response;GO:0008061, chitin binding;GO:0016998, cell wall macromolecule catabolic process	-
TRINITY_DN82301_c3_g3	GO:0003676, nucleic acid binding;GO:0004523, RNA-DNA hybrid ribonuclease activity;GO:0046872, metal ion binding	-
TRINITY_DN82301_c3_g1	-	-
TRINITY_DN83336_c4_g1	GO:0005982, starch metabolic process;GO:0005983, starch catabolic process;GO:0007623, circadian rhythm;GO:0008138, protein tyrosine/serine/threonine phosphatase activity;GO:0009507, chloroplast;GO:0009570, chloroplast stroma;GO:0019203, carbohydrate phosphatase activity;GO:0030247, polysaccharide binding	-
TRINITY_DN204759_c0_g1	GO:0000411, positive regulation of transcription by galactose;GO:0001105, RNA polymerase II transcription coactivator activity;GO:0016592, mediator complex;GO:1900387, negative regulation of cell-cell adhesion by negative regulation of transcription from RNA polymerase II promoter	-
TRINITY_DN77212_c0_g1	GO:0016491, oxidoreductase activity	-
TRINITY_DN89358_c2_g2	-	-
TRINITY_DN85321_c0_g14	-	-
TRINITY_DN89358_c2_g1	-	-
TRINITY_DN85321_c0_g12	-	-
TRINITY_DN85321_c0_g13	-	-
TRINITY_DN85321_c0_g10	-	-
TRINITY_DN43321_c0_g1	-	-
TRINITY_DN53507_c0_g1	GO:0003700, transcription factor activity, sequence-specific DNA binding;GO:0043565, sequence-specific DNA binding	-
TRINITY_DN123938_c0_g1	GO:0000981, RNA polymerase II transcription factor activity, sequence-specific DNA binding;GO:0005634, nucleus;GO:0008270, zinc ion binding	-
TRINITY_DN139060_c0_g1	-	-
TRINITY_DN22398_c0_g1	-	-
TRINITY_DN110373_c0_g1	GO:0000166, nucleotide binding;GO:0003676, nucleic acid binding	-
TRINITY_DN131765_c0_g1	GO:0005524, ATP binding;GO:0005622, intracellular;GO:0006605, protein targeting;GO:0009535, chloroplast thylakoid membrane;GO:0009570, chloroplast stroma;GO:0016020, membrane;GO:0017038, protein import	-
TRINITY_DN109980_c0_g1	-	-
TRINITY_DN164313_c0_g1	GO:0006935, chemotaxis;GO:0009425, bacterial-type flagellum basal body;GO:0016021, integral component of membrane;GO:0071973, bacterial-type flagellum-dependent cell motility	-
TRINITY_DN58586_c0_g1	-	-
TRINITY_DN83198_c4_g1	-	-
TRINITY_DN58586_c0_g2	-	-
TRINITY_DN87770_c0_g1	GO:0003950, NAD+ ADP-ribosyltransferase activity	-
TRINITY_DN87770_c0_g2	GO:0000375, RNA splicing, via transesterification reactions;GO:0003676, nucleic acid binding;GO:0003723, RNA binding;GO:0004004, ATP-dependent RNA helicase activity;GO:0005524, ATP binding;GO:0005634, nucleus;GO:0005682, U5 snRNP;GO:0005737, cytoplasm;GO:0006397, mRNA processing;GO:0010501, RNA secondary structure unwinding;GO:0071013, catalytic step 2 spliceosome	K12858-ko03040 Spliceosome
TRINITY_DN87770_c0_g3	-	-
TRINITY_DN87770_c0_g4	-	-
TRINITY_DN87770_c0_g5	GO:0003950, NAD+ ADP-ribosyltransferase activity	-
TRINITY_DN87770_c0_g6	-	-
TRINITY_DN47822_c0_g1	-	-
TRINITY_DN112644_c0_g1	GO:0004674, protein serine/threonine kinase activity;GO:0004697, protein kinase C activity;GO:0005524, ATP binding;GO:0005634, nucleus;GO:0005654, nucleoplasm;GO:0005737, cytoplasm;GO:0005813, centrosome;GO:0005886, plasma membrane;GO:0006351, transcription, DNA-templated;GO:0006355, regulation of transcription, DNA-templated;GO:0006468, protein phosphorylation;GO:0006915, apoptotic process;GO:00…	-
TRINITY_DN95703_c3_g6	-	-
TRINITY_DN192818_c0_g1	GO:0000722, telomere maintenance via recombination;GO:0000724, double-strand break repair via homologous recombination;GO:0000734, gene conversion at mating-type locus, DNA repair synthesis;GO:0000784, nuclear chromosome, telomeric region;GO:0000790, nuclear chromatin;GO:0000794, condensed nuclear chromosome;GO:0003691, double-stranded telomeric DNA binding;GO:0004017, adenylate kinase activity;G…	-
TRINITY_DN183258_c0_g1	-	-
TRINITY_DN76388_c0_g1	-	-
TRINITY_DN77414_c0_g3	-	-
TRINITY_DN74032_c0_g1	-	-
TRINITY_DN77414_c0_g1	-	-
TRINITY_DN192801_c0_g1	-	-
TRINITY_DN194136_c0_g1	-	-
TRINITY_DN130572_c0_g1	GO:0005089, Rho guanyl-nucleotide exchange factor activity;GO:0035023, regulation of Rho protein signal transduction	-
TRINITY_DN209867_c0_g1	-	-
TRINITY_DN94588_c3_g1	GO:0004672, protein kinase activity;GO:0005524, ATP binding	-
TRINITY_DN139020_c0_g1	-	-
TRINITY_DN195910_c0_g1	-	-
TRINITY_DN182893_c0_g1	GO:0005886, plasma membrane	-
TRINITY_DN14335_c0_g1	GO:0004497, monooxygenase activity;GO:0016491, oxidoreductase activity	-
TRINITY_DN94189_c4_g2	-	-
TRINITY_DN89272_c0_g8	GO:0001653, peptide receptor activity;GO:0004674, protein serine/threonine kinase activity;GO:0004721, phosphoprotein phosphatase activity;GO:0005524, ATP binding;GO:0005886, plasma membrane;GO:0009507, chloroplast;GO:0016021, integral component of membrane;GO:0032440, 2-alkenal reductase [NAD(P)] activity	-
TRINITY_DN89272_c0_g5	-	-
TRINITY_DN89272_c0_g4	GO:0009686, gibberellin biosynthetic process;GO:0016491, oxidoreductase activity;GO:0016707, gibberellin 3-beta-dioxygenase activity;GO:0046872, metal ion binding	K04124-ko00904 Diterpenoid biosynthesis
TRINITY_DN89272_c0_g7	GO:0001653, peptide receptor activity;GO:0004674, protein serine/threonine kinase activity;GO:0005524, ATP binding;GO:0005886, plasma membrane;GO:0009507, chloroplast;GO:0016021, integral component of membrane	-
TRINITY_DN89272_c0_g6	GO:0004674, protein serine/threonine kinase activity;GO:0005524, ATP binding;GO:0016021, integral component of membrane	-
TRINITY_DN89272_c0_g1	GO:0001653, peptide receptor activity;GO:0004674, protein serine/threonine kinase activity;GO:0005524, ATP binding;GO:0005886, plasma membrane;GO:0009507, chloroplast;GO:0016021, integral component of membrane	-
TRINITY_DN89272_c0_g3	GO:0005623, cell;GO:0006812, cation transport;GO:0009055, electron carrier activity;GO:0009507, chloroplast;GO:0009570, chloroplast stroma;GO:0015035, protein disulfide oxidoreductase activity;GO:0016787, hydrolase activity;GO:0045454, cell redox homeostasis;GO:0046872, metal ion binding;GO:0051537, 2 iron, 2 sulfur cluster binding	-
TRINITY_DN89272_c0_g2	GO:0001653, peptide receptor activity;GO:0004674, protein serine/threonine kinase activity;GO:0005524, ATP binding;GO:0005886, plasma membrane;GO:0009507, chloroplast;GO:0016021, integral component of membrane	-
TRINITY_DN134682_c0_g1	GO:0016740, transferase activity	-
TRINITY_DN118240_c0_g1	GO:0003980, UDP-glucose:glycoprotein glucosyltransferase activity;GO:0005783, endoplasmic reticulum;GO:0005788, endoplasmic reticulum lumen;GO:0005793, endoplasmic reticulum-Golgi intermediate compartment;GO:0006486, protein glycosylation;GO:0044322, endoplasmic reticulum quality control compartment;GO:0051082, unfolded protein binding;GO:0051084, 'de novo' posttranslational protein folding;GO:00…	-
TRINITY_DN211751_c0_g1	GO:0000276, mitochondrial proton-transporting ATP synthase complex, coupling factor F(o);GO:0015986, ATP synthesis coupled proton transport;GO:0016021, integral component of membrane	-
TRINITY_DN48667_c0_g1	GO:0001934, positive regulation of protein phosphorylation;GO:0005096, GTPase activator activity;GO:0007049, cell cycle;GO:0014068, positive regulation of phosphatidylinositol 3-kinase signaling;GO:0030036, actin cytoskeleton organization;GO:0030335, positive regulation of cell migration;GO:0031932, TORC2 complex	-
TRINITY_DN204830_c0_g1	GO:0004316, 3-oxoacyl-[acyl-carrier-protein] reductase (NADPH) activity;GO:0016491, oxidoreductase activity	-
TRINITY_DN94189_c4_g3	-	-
TRINITY_DN220455_c0_g1	-	-
TRINITY_DN85156_c1_g3	GO:0002213, defense response to insect;GO:0004497, monooxygenase activity;GO:0005506, iron ion binding;GO:0016020, membrane;GO:0016021, integral component of membrane;GO:0016705, oxidoreductase activity, acting on paired donors, with incorporation or reduction of molecular oxygen;GO:0016709, oxidoreductase activity, acting on paired donors, with incorporation or reduction of molecular oxygen, NAD…	-
TRINITY_DN85156_c1_g2	GO:0004497, monooxygenase activity;GO:0005506, iron ion binding;GO:0005789, endoplasmic reticulum membrane;GO:0016021, integral component of membrane;GO:0016705, oxidoreductase activity, acting on paired donors, with incorporation or reduction of molecular oxygen;GO:0020037, heme binding;GO:0048000, isoflavone 3'-hydroxylase activity	-
TRINITY_DN85156_c1_g1	GO:0005506, iron ion binding;GO:0016020, membrane;GO:0016021, integral component of membrane;GO:0016709, oxidoreductase activity, acting on paired donors, with incorporation or reduction of molecular oxygen, NAD(P)H as one donor, and incorporation of one atom of oxygen;GO:0020037, heme binding;GO:0033773, isoflavone 2'-hydroxylase activity;GO:0042343, indole glucosinolate metabolic process;GO:004…	-
TRINITY_DN97132_c1_g9	GO:0005737, cytoplasm;GO:0008270, zinc ion binding;GO:0050750, low-density lipoprotein particle receptor binding	-
TRINITY_DN97132_c1_g6	GO:0008270, zinc ion binding	-
TRINITY_DN97132_c1_g7	GO:0008270, zinc ion binding;GO:0009506, plasmodesma	-
TRINITY_DN97132_c1_g4	GO:0005737, cytoplasm;GO:0008270, zinc ion binding;GO:0050750, low-density lipoprotein particle receptor binding	-
TRINITY_DN97132_c1_g5	GO:0008270, zinc ion binding;GO:0009506, plasmodesma	-
TRINITY_DN73390_c0_g1	GO:0004084, branched-chain-amino-acid transaminase activity;GO:0009081, branched-chain amino acid metabolic process;GO:0009082, branched-chain amino acid biosynthetic process;GO:0009403, toxin biosynthetic process;GO:0052654, L-leucine transaminase activity;GO:0052655, L-valine transaminase activity;GO:0052656, L-isoleucine transaminase activity	-
TRINITY_DN97132_c1_g3	-	-
TRINITY_DN97132_c1_g1	GO:0008270, zinc ion binding	-
TRINITY_DN60408_c0_g1	GO:0000166, nucleotide binding;GO:0000243, commitment complex;GO:0000398, mRNA splicing, via spliceosome;GO:0003723, RNA binding;GO:0005634, nucleus;GO:0005654, nucleoplasm;GO:0005681, spliceosomal complex;GO:0006369, termination of RNA polymerase II transcription;GO:0006397, mRNA processing;GO:0006405, RNA export from nucleus;GO:0006406, mRNA export from nucleus;GO:0008187, poly-pyrimidine tract…	K12837-ko03040 Spliceosome
TRINITY_DN89888_c1_g2	GO:0005524, ATP binding	-
TRINITY_DN89888_c1_g1	GO:0005886, plasma membrane;GO:0005887, integral component of plasma membrane;GO:0006897, endocytosis;GO:0009405, pathogenesis;GO:0016021, integral component of membrane;GO:0030447, filamentous growth;GO:0030866, cortical actin cytoskeleton organization;GO:0031505, fungal-type cell wall organization;GO:0032126, eisosome;GO:0032185, septin cytoskeleton organization;GO:0036170, filamentous growth o…	-
TRINITY_DN205468_c0_g1	-	-
TRINITY_DN89888_c1_g5	GO:0005524, ATP binding	-
TRINITY_DN11058_c0_g1	-	-
TRINITY_DN192267_c0_g1	-	-
TRINITY_DN219964_c0_g1	-	-
TRINITY_DN66560_c0_g1	GO:0016021, integral component of membrane	-
TRINITY_DN212901_c0_g1	GO:0003677, DNA binding;GO:0006281, DNA repair;GO:0006511, ubiquitin-dependent protein catabolic process;GO:0046872, metal ion binding	-
TRINITY_DN177371_c0_g1	GO:0000122, negative regulation of transcription from RNA polymerase II promoter;GO:0003682, chromatin binding;GO:0005730, nucleolus;GO:0005731, nucleolus organizer region;GO:0005737, cytoplasm;GO:0007072, positive regulation of transcription involved in exit from mitosis;GO:0009303, rRNA transcription;GO:0046872, metal ion binding;GO:0070403, NAD+ binding;GO:0070932, histone H3 deacetylation;GO:…	-
TRINITY_DN58344_c0_g1	GO:0000054, ribosomal subunit export from nucleus;GO:0005525, GTP binding;GO:0005730, nucleolus;GO:0006364, rRNA processing;GO:0030687, preribosome, large subunit precursor;GO:0042254, ribosome biogenesis;GO:0042273, ribosomal large subunit biogenesis;GO:0046872, metal ion binding;GO:1902626, assembly of large subunit precursor of preribosome	-
TRINITY_DN89851_c1_g3	-	-
TRINITY_DN147084_c0_g1	-	-
TRINITY_DN13379_c0_g1	GO:0000281, mitotic cytokinesis;GO:0000302, response to reactive oxygen species;GO:0000902, cell morphogenesis;GO:0005094, Rho GDP-dissociation inhibitor activity;GO:0005096, GTPase activator activity;GO:0005737, cytoplasm;GO:0005829, cytosol;GO:0006907, pinocytosis;GO:0009617, response to bacterium;GO:0017048, Rho GTPase binding;GO:0030036, actin cytoskeleton organization;GO:0035023, regulation …	-
TRINITY_DN133532_c0_g1	GO:0001953, negative regulation of cell-matrix adhesion;GO:0004385, guanylate kinase activity;GO:0004674, protein serine/threonine kinase activity;GO:0005524, ATP binding;GO:0005604, basement membrane;GO:0005652, nuclear lamina;GO:0005730, nucleolus;GO:0005737, cytoplasm;GO:0005829, cytosol;GO:0005886, plasma membrane;GO:0005911, cell-cell junction;GO:0005925, focal adhesion;GO:0007155, cell adhe…	-
TRINITY_DN198541_c0_g1	-	-
TRINITY_DN180173_c0_g1	GO:0030288, outer membrane-bounded periplasmic space	-
TRINITY_DN50156_c0_g2	GO:0002116, semaphorin receptor complex;GO:0005634, nucleus;GO:0005737, cytoplasm;GO:0005886, plasma membrane;GO:0005887, integral component of plasma membrane;GO:0014910, regulation of smooth muscle cell migration;GO:0016020, membrane;GO:0017154, semaphorin receptor activity;GO:0021785, branchiomotor neuron axon guidance;GO:0030334, regulation of cell migration;GO:0048841, regulation of axon ext…	-
TRINITY_DN106702_c0_g1	-	-
TRINITY_DN50156_c0_g1	GO:0002116, semaphorin receptor complex;GO:0005634, nucleus;GO:0005737, cytoplasm;GO:0005886, plasma membrane;GO:0005887, integral component of plasma membrane;GO:0014910, regulation of smooth muscle cell migration;GO:0016020, membrane;GO:0016021, integral component of membrane;GO:0017154, semaphorin receptor activity;GO:0021785, branchiomotor neuron axon guidance;GO:0048841, regulation of axon e…	-
TRINITY_DN190577_c0_g1	GO:0005829, cytosol;GO:0006979, response to oxidative stress;GO:0008113, peptide-methionine (S)-S-oxide reductase activity;GO:0030091, protein repair	-
TRINITY_DN190965_c0_g1	-	-
TRINITY_DN115390_c0_g1	GO:0003677, DNA binding;GO:0005634, nucleus;GO:0006351, transcription, DNA-templated;GO:0006355, regulation of transcription, DNA-templated;GO:0046872, metal ion binding	-
TRINITY_DN157087_c0_g1	-	-
TRINITY_DN94189_c4_g1	-	-
TRINITY_DN154071_c0_g1	-	-
TRINITY_DN96460_c0_g6	GO:0008270, zinc ion binding	-
TRINITY_DN96460_c0_g7	-	-
TRINITY_DN96460_c0_g4	GO:0004462, lactoylglutathione lyase activity;GO:0009409, response to cold;GO:0009507, chloroplast;GO:0009570, chloroplast stroma;GO:0009579, thylakoid;GO:0010319, stromule;GO:0031977, thylakoid lumen;GO:0046872, metal ion binding	K01759-ko00620 Pyruvate metabolism
TRINITY_DN96460_c0_g5	-	-
TRINITY_DN96460_c0_g2	GO:0004462, lactoylglutathione lyase activity;GO:0009409, response to cold;GO:0009507, chloroplast;GO:0009570, chloroplast stroma;GO:0009579, thylakoid;GO:0010319, stromule;GO:0031977, thylakoid lumen;GO:0046872, metal ion binding	-
TRINITY_DN96460_c0_g3	GO:0008270, zinc ion binding	-
TRINITY_DN96460_c0_g1	-	-
TRINITY_DN65144_c0_g1	-	-
TRINITY_DN208699_c0_g1	GO:0001525, angiogenesis;GO:0005829, cytosol;GO:0005886, plasma membrane;GO:0006915, apoptotic process;GO:0006935, chemotaxis;GO:0016021, integral component of membrane;GO:0016525, negative regulation of angiogenesis;GO:0030154, cell differentiation;GO:1901800, positive regulation of proteasomal protein catabolic process;GO:2000353, positive regulation of endothelial cell apoptotic process	-
TRINITY_DN108217_c0_g1	GO:0004069, L-aspartate:2-oxoglutarate aminotransferase activity;GO:0005737, cytoplasm;GO:0005829, cytosol;GO:0006099, tricarboxylic acid cycle;GO:0006103, 2-oxoglutarate metabolic process;GO:0006522, alanine metabolic process;GO:0006531, aspartate metabolic process;GO:0006532, aspartate biosynthetic process;GO:0006536, glutamate metabolic process;GO:0006807, nitrogen compound metabolic process;G…	-
TRINITY_DN96460_c0_g8	GO:0000160, phosphorelay signal transduction system;GO:0003677, DNA binding;GO:0005634, nucleus;GO:0006351, transcription, DNA-templated;GO:0006355, regulation of transcription, DNA-templated;GO:0016301, kinase activity	-
TRINITY_DN96460_c0_g9	GO:0004672, protein kinase activity;GO:0004674, protein serine/threonine kinase activity;GO:0005524, ATP binding;GO:0005886, plasma membrane;GO:0009506, plasmodesma;GO:0016020, membrane;GO:0016021, integral component of membrane;GO:0090406, pollen tube	-
TRINITY_DN156427_c0_g1	-	-
TRINITY_DN90268_c2_g3	-	-
TRINITY_DN177852_c0_g1	GO:0000122, negative regulation of transcription from RNA polymerase II promoter;GO:0003677, DNA binding;GO:0003682, chromatin binding;GO:0005634, nucleus;GO:0006351, transcription, DNA-templated;GO:0048286, lung alveolus development	-
TRINITY_DN189721_c0_g1	-	-
TRINITY_DN176162_c0_g1	-	-
TRINITY_DN125523_c0_g1	GO:0005524, ATP binding;GO:0006468, protein phosphorylation;GO:0006633, fatty acid biosynthetic process;GO:0016208, AMP binding;GO:0016301, kinase activity;GO:0031588, nucleotide-activated protein kinase complex;GO:0043531, ADP binding	-
TRINITY_DN94189_c4_g6	-	-
TRINITY_DN80612_c0_g1	-	-
TRINITY_DN80612_c0_g2	-	-
TRINITY_DN127613_c0_g1	-	-
TRINITY_DN157838_c0_g1	GO:0002161, aminoacyl-tRNA editing activity;GO:0004822, isoleucine-tRNA ligase activity;GO:0005524, ATP binding;GO:0005737, cytoplasm;GO:0006418, tRNA aminoacylation for protein translation;GO:0006428, isoleucyl-tRNA aminoacylation;GO:0008270, zinc ion binding;GO:0046872, metal ion binding	-
TRINITY_DN90146_c0_g1	-	-
TRINITY_DN153038_c0_g1	GO:0005886, plasma membrane;GO:0016021, integral component of membrane;GO:0019630, quinate metabolic process;GO:0022891, substrate-specific transmembrane transporter activity	-
TRINITY_DN133189_c0_g1	-	-
TRINITY_DN93979_c2_g2	-	-
TRINITY_DN80162_c0_g1	GO:0000001, mitochondrion inheritance;GO:0000002, mitochondrial genome maintenance;GO:0000329, fungal-type vacuole membrane;GO:0003924, GTPase activity;GO:0005525, GTP binding;GO:0005758, mitochondrial intermembrane space;GO:0007006, mitochondrial membrane organization;GO:0008053, mitochondrial fusion;GO:0016021, integral component of membrane;GO:0030061, mitochondrial crista;GO:0031304, intrinsi…	-
TRINITY_DN84260_c1_g8	GO:0003735, structural constituent of ribosome;GO:0005634, nucleus;GO:0005840, ribosome;GO:0006412, translation	K02927-ko03010 Ribosome
TRINITY_DN149375_c0_g1	-	-
TRINITY_DN93979_c2_g3	-	-
TRINITY_DN95813_c0_g9	GO:0004672, protein kinase activity;GO:0005524, ATP binding	-
TRINITY_DN95813_c0_g8	GO:0003724, RNA helicase activity;GO:0005524, ATP binding;GO:0005737, cytoplasm;GO:0009616, virus induced gene silencing;GO:0035194, posttranscriptional gene silencing by RNA	-
TRINITY_DN201647_c0_g1	GO:0004474, malate synthase activity;GO:0005777, peroxisome;GO:0005782, peroxisomal matrix;GO:0006097, glyoxylate cycle;GO:0006099, tricarboxylic acid cycle;GO:0009062, fatty acid catabolic process;GO:0009514, glyoxysome;GO:0015976, carbon utilization;GO:0045733, acetate catabolic process	-
TRINITY_DN216096_c0_g1	GO:0003676, nucleic acid binding;GO:0004815, aspartate-tRNA ligase activity;GO:0005524, ATP binding;GO:0005737, cytoplasm;GO:0006418, tRNA aminoacylation for protein translation	-
TRINITY_DN95813_c0_g5	GO:0005524, ATP binding;GO:0005634, nucleus;GO:0005739, mitochondrion;GO:0005741, mitochondrial outer membrane;GO:0008568, microtubule-severing ATPase activity;GO:0016887, ATPase activity;GO:0031122, cytoplasmic microtubule organization;GO:0045041, protein import into mitochondrial intermembrane space	-
TRINITY_DN84260_c1_g1	GO:0005634, nucleus;GO:0005737, cytoplasm;GO:0005773, vacuole;GO:0006464, cellular protein modification process;GO:0009751, response to salicylic acid	-
TRINITY_DN84260_c1_g2	GO:0002181, cytoplasmic translation;GO:0003735, structural constituent of ribosome;GO:0005634, nucleus;GO:0005730, nucleolus;GO:0005829, cytosol;GO:0005840, ribosome;GO:0006412, translation;GO:0022625, cytosolic large ribosomal subunit;GO:0042254, ribosome biogenesis	-
TRINITY_DN95813_c0_g6	GO:0000139, Golgi membrane;GO:0005794, Golgi apparatus;GO:0009409, response to cold;GO:0016021, integral component of membrane;GO:0016413, O-acetyltransferase activity;GO:0045492, xylan biosynthetic process;GO:0045893, positive regulation of transcription, DNA-templated;GO:0050826, response to freezing;GO:1990538, xylan O-acetyltransferase activity	-
TRINITY_DN84260_c1_g4	GO:0005634, nucleus;GO:0005737, cytoplasm;GO:0006511, ubiquitin-dependent protein catabolic process	-
TRINITY_DN84260_c1_g5	GO:0003735, structural constituent of ribosome;GO:0005634, nucleus;GO:0005840, ribosome;GO:0006412, translation	-
TRINITY_DN84260_c1_g6	GO:0003735, structural constituent of ribosome;GO:0005634, nucleus;GO:0005829, cytosol;GO:0005840, ribosome;GO:0005875, microtubule associated complex;GO:0006412, translation;GO:0006464, cellular protein modification process;GO:0006511, ubiquitin-dependent protein catabolic process;GO:0007219, Notch signaling pathway;GO:0016567, protein ubiquitination;GO:0022625, cytosolic large ribosomal subunit…	-
TRINITY_DN84260_c1_g7	GO:0003735, structural constituent of ribosome;GO:0005634, nucleus;GO:0005840, ribosome;GO:0006412, translation	-
TRINITY_DN114937_c0_g1	GO:0005215, transporter activity;GO:0006857, oligopeptide transport;GO:0015031, protein transport;GO:0016021, integral component of membrane	-
TRINITY_DN94334_c0_g1	-	-
TRINITY_DN94334_c0_g2	GO:0008270, zinc ion binding;GO:0016021, integral component of membrane	-
TRINITY_DN94334_c0_g3	GO:0008270, zinc ion binding;GO:0016021, integral component of membrane	-
TRINITY_DN94334_c0_g4	GO:0008270, zinc ion binding;GO:0016021, integral component of membrane	-
TRINITY_DN87492_c0_g2	GO:0000462, maturation of SSU-rRNA from tricistronic rRNA transcript (SSU-rRNA, 5.8S rRNA, LSU-rRNA);GO:0000463, maturation of LSU-rRNA from tricistronic rRNA transcript (SSU-rRNA, 5.8S rRNA, LSU-rRNA);GO:0000466, maturation of 5.8S rRNA from tricistronic rRNA transcript (SSU-rRNA, 5.8S rRNA, LSU-rRNA);GO:0003723, RNA binding;GO:0005654, nucleoplasm;GO:0030687, preribosome, large subunit precurso…	-
TRINITY_DN94334_c0_g6	GO:0008270, zinc ion binding;GO:0016021, integral component of membrane	-
TRINITY_DN94334_c0_g7	-	-
TRINITY_DN94334_c0_g8	-	-
TRINITY_DN94334_c0_g9	-	-
TRINITY_DN45151_c0_g1	-	-
TRINITY_DN95870_c1_g4	-	-
TRINITY_DN95870_c1_g3	GO:0008270, zinc ion binding;GO:0009507, chloroplast;GO:0009793, embryo development ending in seed dormancy	-
TRINITY_DN66779_c0_g1	-	-
TRINITY_DN95870_c1_g1	-	-
TRINITY_DN206225_c0_g1	GO:0003746, translation elongation factor activity;GO:0003924, GTPase activity;GO:0005525, GTP binding;GO:0005737, cytoplasm	-
TRINITY_DN166314_c0_g1	-	-
TRINITY_DN173311_c0_g1	-	-
TRINITY_DN94189_c4_g4	-	-
TRINITY_DN86724_c0_g1	GO:0008270, zinc ion binding;GO:0016021, integral component of membrane	-
TRINITY_DN86724_c0_g2	-	-
TRINITY_DN86724_c0_g3	-	-
TRINITY_DN86724_c0_g4	GO:0008270, zinc ion binding;GO:0016021, integral component of membrane	-
TRINITY_DN86724_c0_g5	-	-
TRINITY_DN86724_c0_g6	-	-
TRINITY_DN85295_c0_g4	GO:0003677, DNA binding;GO:0005634, nucleus;GO:0006351, transcription, DNA-templated;GO:0006355, regulation of transcription, DNA-templated	-
TRINITY_DN115828_c0_g1	GO:0005739, mitochondrion;GO:0005813, centrosome;GO:0005886, plasma membrane;GO:0005887, integral component of plasma membrane;GO:0006090, pyruvate metabolic process;GO:0006629, lipid metabolic process;GO:0008028, monocarboxylic acid transmembrane transporter activity;GO:0015129, lactate transmembrane transporter activity;GO:0015130, mevalonate transmembrane transporter activity;GO:0015293, sympo…	-
TRINITY_DN85295_c0_g5	-	-
TRINITY_DN81473_c0_g6	-	-
TRINITY_DN132305_c0_g1	-	-
TRINITY_DN81473_c0_g4	-	-
TRINITY_DN81473_c0_g5	-	-
TRINITY_DN81473_c0_g2	-	-
TRINITY_DN81473_c0_g3	-	-
TRINITY_DN86834_c0_g2	-	-
TRINITY_DN81473_c0_g1	-	-
TRINITY_DN96115_c1_g1	GO:0004298, threonine-type endopeptidase activity;GO:0005634, nucleus;GO:0005737, cytoplasm;GO:0006511, ubiquitin-dependent protein catabolic process;GO:0019773, proteasome core complex, alpha-subunit complex	K02726-ko03050 Proteasome
TRINITY_DN96115_c1_g2	GO:0008236, serine-type peptidase activity;GO:0009543, chloroplast thylakoid lumen	-
TRINITY_DN96115_c1_g3	GO:0004298, threonine-type endopeptidase activity;GO:0005634, nucleus;GO:0005737, cytoplasm;GO:0006511, ubiquitin-dependent protein catabolic process;GO:0019773, proteasome core complex, alpha-subunit complex	-
TRINITY_DN83965_c4_g4	-	-
TRINITY_DN151021_c0_g1	GO:0005634, nucleus;GO:0005829, cytosol;GO:0006479, protein methylation;GO:0008757, S-adenosylmethionine-dependent methyltransferase activity;GO:0051998, protein carboxyl O-methyltransferase activity	-
TRINITY_DN172031_c0_g1	-	-
TRINITY_DN83965_c4_g1	-	-
TRINITY_DN83965_c4_g2	-	-
TRINITY_DN83965_c4_g3	GO:0004672, protein kinase activity;GO:0005524, ATP binding	-
TRINITY_DN110740_c0_g1	GO:0003676, nucleic acid binding	-
TRINITY_DN110146_c0_g1	-	-
TRINITY_DN85295_c0_g2	-	-
TRINITY_DN213746_c0_g1	-	-
TRINITY_DN148962_c0_g1	GO:0000002, mitochondrial genome maintenance;GO:0015914, phospholipid transport;GO:0030176, integral component of endoplasmic reticulum membrane;GO:0032865, ERMES complex;GO:0045040, protein import into mitochondrial outer membrane;GO:0070096, mitochondrial outer membrane translocase complex assembly;GO:1990456, mitochondrion-ER tethering	-
TRINITY_DN85295_c0_g3	-	-
TRINITY_DN36968_c0_g1	GO:0005524, ATP binding;GO:0005886, plasma membrane;GO:0009405, pathogenesis;GO:0010106, cellular response to iron ion starvation;GO:0015891, siderophore transport;GO:0016021, integral component of membrane;GO:0016491, oxidoreductase activity;GO:0033214, iron assimilation by chelation and transport;GO:0033216, ferric iron import;GO:0040007, growth;GO:0042626, ATPase activity, coupled to transmemb…	-
TRINITY_DN143241_c0_g1	-	-
TRINITY_DN84336_c0_g3	-	-
TRINITY_DN57511_c0_g1	-	-
TRINITY_DN129470_c0_g1	-	-
TRINITY_DN87487_c1_g1	-	-
TRINITY_DN24584_c0_g1	GO:0008483, transaminase activity;GO:0009058, biosynthetic process;GO:0010285, L,L-diaminopimelate aminotransferase activity;GO:0030170, pyridoxal phosphate binding;GO:0033362, lysine biosynthetic process via diaminopimelate, diaminopimelate-aminotransferase pathway	-
TRINITY_DN174771_c0_g1	-	-
TRINITY_DN153962_c0_g1	GO:0010212, response to ionizing radiation;GO:0051607, defense response to virus	-
TRINITY_DN208315_c0_g1	-	-
TRINITY_DN137048_c0_g1	GO:0000079, regulation of cyclin-dependent protein serine/threonine kinase activity;GO:0000228, nuclear chromosome;GO:0000405, bubble DNA binding;GO:0000724, double-strand break repair via homologous recombination;GO:0000729, DNA double-strand break processing;GO:0000731, DNA synthesis involved in DNA repair;GO:0000732, strand displacement;GO:0000781, chromosome, telomeric region;GO:0000800, late…	-
TRINITY_DN127877_c0_g1	-	-
TRINITY_DN151996_c0_g1	GO:0005743, mitochondrial inner membrane;GO:0030150, protein import into mitochondrial matrix;GO:0051087, chaperone binding	-
TRINITY_DN96703_c0_g1	GO:0004843, thiol-dependent ubiquitin-specific protease activity;GO:0016579, protein deubiquitination;GO:0030587, sorocarp development;GO:0046872, metal ion binding	K13719-ko04141 Protein processing in endoplasmic reticulum
TRINITY_DN96703_c0_g2	-	-
TRINITY_DN96703_c0_g3	GO:0004843, thiol-dependent ubiquitin-specific protease activity;GO:0030433, ubiquitin-dependent ERAD pathway;GO:0030968, endoplasmic reticulum unfolded protein response;GO:0035523, protein K29-linked deubiquitination;GO:0035871, protein K11-linked deubiquitination;GO:0046872, metal ion binding;GO:0070536, protein K63-linked deubiquitination;GO:0071108, protein K48-linked deubiquitination;GO:1990…	-
TRINITY_DN59388_c0_g1	GO:0000462, maturation of SSU-rRNA from tricistronic rRNA transcript (SSU-rRNA, 5.8S rRNA, LSU-rRNA);GO:0003735, structural constituent of ribosome;GO:0005840, ribosome;GO:0006412, translation;GO:0022627, cytosolic small ribosomal subunit;GO:0043009, chordate embryonic development;GO:0051726, regulation of cell cycle	-
TRINITY_DN194017_c0_g1	-	-
TRINITY_DN134933_c0_g1	GO:0003684, damaged DNA binding;GO:0005524, ATP binding;GO:0005829, cytosol;GO:0006281, DNA repair;GO:0008094, DNA-dependent ATPase activity;GO:0046872, metal ion binding	-
TRINITY_DN144890_c0_g1	-	-
TRINITY_DN185461_c0_g1	GO:0004458, D-lactate dehydrogenase (cytochrome) activity;GO:0005739, mitochondrion;GO:0005743, mitochondrial inner membrane;GO:0005758, mitochondrial intermembrane space;GO:0006626, protein targeting to mitochondrion;GO:0016614, oxidoreductase activity, acting on CH-OH group of donors;GO:0050660, flavin adenine dinucleotide binding;GO:1903457, lactate catabolic process	-
TRINITY_DN115144_c0_g1	-	-
TRINITY_DN97525_c1_g2	GO:0005737, cytoplasm;GO:0005975, carbohydrate metabolic process;GO:0008184, glycogen phosphorylase activity;GO:0030170, pyridoxal phosphate binding	-
TRINITY_DN97525_c1_g3	-	-
TRINITY_DN118795_c0_g1	-	-
TRINITY_DN97525_c1_g1	-	-
TRINITY_DN165424_c0_g1	GO:0003700, transcription factor activity, sequence-specific DNA binding;GO:0006351, transcription, DNA-templated;GO:0019172, glyoxalase III activity;GO:0019243, methylglyoxal catabolic process to D-lactate via S-lactoyl-glutathione;GO:0043565, sequence-specific DNA binding;GO:1900079, regulation of arginine biosynthetic process;GO:1900081, regulation of arginine catabolic process	-
TRINITY_DN86020_c0_g2	GO:0004563, beta-N-acetylhexosaminidase activity;GO:0005618, cell wall;GO:0005886, plasma membrane;GO:0005975, carbohydrate metabolic process;GO:0009505, plant-type cell wall;GO:0015929, hexosaminidase activity	K12373-ko00520 Amino sugar and nucleotide sugar metabolism;ko00603 Glycosphingolipid biosynthesis - globo series;ko00511 Other glycan degradation;ko00513 Various types of N-glycan biosynthesis;ko00604 Glycosphingolipid biosynthesis - ganglio series;ko00531 Glycosaminoglycan degradation;ko04142 Lysosome
TRINITY_DN135541_c0_g1	GO:0000154, rRNA modification;GO:0005732, small nucleolar ribonucleoprotein complex;GO:0006364, rRNA processing;GO:0030515, snoRNA binding;GO:0031428, box C/D snoRNP complex;GO:0032040, small-subunit processome	-
TRINITY_DN213466_c0_g1	GO:0004674, protein serine/threonine kinase activity;GO:0005524, ATP binding;GO:0006914, autophagy;GO:0015031, protein transport;GO:0034045, pre-autophagosomal structure membrane	-
TRINITY_DN48419_c0_g1	GO:0004774, succinate-CoA ligase activity;GO:0004775, succinate-CoA ligase (ADP-forming) activity;GO:0005524, ATP binding;GO:0005739, mitochondrion;GO:0006099, tricarboxylic acid cycle;GO:0006104, succinyl-CoA metabolic process;GO:0006105, succinate metabolic process;GO:0008152, metabolic process;GO:0016874, ligase activity;GO:0043209, myelin sheath;GO:0046872, metal ion binding;GO:0070062, extra…	-
TRINITY_DN161451_c0_g1	GO:0045087, innate immune response	-
TRINITY_DN125167_c0_g1	-	-
TRINITY_DN96689_c1_g4	GO:0005783, endoplasmic reticulum;GO:0008299, isoprenoid biosynthetic process;GO:0009536, plastid;GO:0010236, plastoquinone biosynthetic process;GO:0015979, photosynthesis;GO:0016765, transferase activity, transferring alkyl or aryl (other than methyl) groups;GO:0046872, metal ion binding;GO:0050347, trans-octaprenyltranstransferase activity;GO:0052924, all-trans-nonaprenyl-diphosphate synthase (…	K05356-ko00900 Terpenoid backbone biosynthesis
TRINITY_DN59370_c0_g1	-	-
TRINITY_DN76534_c0_g1	-	-
TRINITY_DN93820_c2_g3	GO:0009534, chloroplast thylakoid;GO:0009535, chloroplast thylakoid membrane;GO:0010027, thylakoid membrane organization;GO:0016021, integral component of membrane;GO:0090351, seedling development	-
TRINITY_DN98117_c0_g1	-	-
TRINITY_DN174983_c0_g1	GO:0006629, lipid metabolic process;GO:0006633, fatty acid biosynthetic process;GO:0006636, unsaturated fatty acid biosynthetic process;GO:0016021, integral component of membrane;GO:0016491, oxidoreductase activity;GO:0016717, oxidoreductase activity, acting on paired donors, with oxidation of a pair of donors resulting in the reduction of molecular oxygen to two molecules of water	-
TRINITY_DN125730_c0_g1	-	-
TRINITY_DN175518_c0_g1	-	-
TRINITY_DN67411_c0_g1	GO:0000166, nucleotide binding;GO:0003676, nucleic acid binding;GO:0003723, RNA binding;GO:0005634, nucleus;GO:0005737, cytoplasm;GO:0005829, cytosol;GO:0016973, poly(A)+ mRNA export from nucleus	-
TRINITY_DN71090_c0_g1	-	-
TRINITY_DN71090_c0_g2	-	-
TRINITY_DN71090_c0_g3	-	-
TRINITY_DN153122_c0_g1	GO:0000011, vacuole inheritance;GO:0000103, sulfate assimilation;GO:0000139, Golgi membrane;GO:0000324, fungal-type vacuole;GO:0005623, cell;GO:0005634, nucleus;GO:0005829, cytosol;GO:0006457, protein folding;GO:0006662, glycerol ether metabolic process;GO:0006749, glutathione metabolic process;GO:0006888, ER to Golgi vesicle-mediated transport;GO:0006890, retrograde vesicle-mediated transport, G…	-
TRINITY_DN104221_c0_g1	-	-
TRINITY_DN213672_c0_g1	-	-
TRINITY_DN168289_c0_g1	-	-
TRINITY_DN208753_c0_g1	GO:0003904, deoxyribodipyrimidine photo-lyase activity;GO:0018298, protein-chromophore linkage	-
TRINITY_DN114522_c0_g1	GO:0000124, SAGA complex;GO:0000790, nuclear chromatin;GO:0000991, transcription factor activity, core RNA polymerase II binding;GO:0005634, nucleus;GO:0005669, transcription factor TFIID complex;GO:0005829, cytosol;GO:0006338, chromatin remodeling;GO:0006352, DNA-templated transcription, initiation;GO:0006367, transcription initiation from RNA polymerase II promoter;GO:0016573, histone acetylati…	-
TRINITY_DN140530_c0_g1	GO:0000187, activation of MAPK activity;GO:0001541, ovarian follicle development;GO:0002318, myeloid progenitor cell differentiation;GO:0002320, lymphoid progenitor cell differentiation;GO:0002327, immature B cell differentiation;GO:0002371, dendritic cell cytokine production;GO:0002551, mast cell chemotaxis;GO:0004714, transmembrane receptor protein tyrosine kinase activity;GO:0004716, signal tr…	-
TRINITY_DN147901_c0_g1	GO:0009538, photosystem I reaction center;GO:0009543, chloroplast thylakoid lumen;GO:0015979, photosynthesis	K02694-ko00195 Photosynthesis
TRINITY_DN81812_c2_g1	-	-
TRINITY_DN217440_c0_g1	-	-
TRINITY_DN104712_c0_g1	-	-
TRINITY_DN103034_c0_g1	GO:0005737, cytoplasm;GO:0006534, cysteine metabolic process;GO:0009000, selenocysteine lyase activity;GO:0030170, pyridoxal phosphate binding;GO:0031071, cysteine desulfurase activity	-
TRINITY_DN135508_c0_g1	-	-
TRINITY_DN159216_c0_g1	GO:0000183, chromatin silencing at rDNA;GO:0000793, condensed chromosome;GO:0003677, DNA binding;GO:0004386, helicase activity;GO:0005524, ATP binding;GO:0005634, nucleus;GO:0005654, nucleoplasm;GO:0005677, chromatin silencing complex;GO:0005730, nucleolus;GO:0006302, double-strand break repair;GO:0006334, nucleosome assembly;GO:0006338, chromatin remodeling;GO:0006352, DNA-templated transcriptio…	-
TRINITY_DN96826_c3_g4	-	-
TRINITY_DN148461_c0_g1	-	-
TRINITY_DN121255_c0_g1	GO:0005886, plasma membrane;GO:0055085, transmembrane transport	-
TRINITY_DN96826_c3_g1	GO:0003743, translation initiation factor activity;GO:0005525, GTP binding	-
TRINITY_DN102037_c0_g1	GO:0005737, cytoplasm	-
TRINITY_DN96826_c3_g3	GO:0003743, translation initiation factor activity;GO:0005525, GTP binding;GO:0005829, cytosol	K03262-ko03013 RNA transport;ko04214 Apoptosis - fly
TRINITY_DN96826_c3_g2	GO:0003743, translation initiation factor activity;GO:0005525, GTP binding	-
TRINITY_DN195927_c0_g1	GO:0004851, uroporphyrin-III C-methyltransferase activity;GO:0009236, cobalamin biosynthetic process;GO:0019354, siroheme biosynthetic process;GO:0043115, precorrin-2 dehydrogenase activity;GO:0051266, sirohydrochlorin ferrochelatase activity;GO:0051287, NAD binding	K02303-ko00860 Porphyrin and chlorophyll metabolism
TRINITY_DN58283_c0_g2	GO:0005737, cytoplasm;GO:0016790, thiolester hydrolase activity;GO:0016811, hydrolase activity, acting on carbon-nitrogen (but not peptide) bonds, in linear amides;GO:0016829, lyase activity;GO:0030091, protein repair;GO:0042026, protein refolding	-
TRINITY_DN58283_c0_g1	GO:0005737, cytoplasm;GO:0016790, thiolester hydrolase activity;GO:0016811, hydrolase activity, acting on carbon-nitrogen (but not peptide) bonds, in linear amides;GO:0019172, glyoxalase III activity;GO:0019243, methylglyoxal catabolic process to D-lactate via S-lactoyl-glutathione;GO:0030091, protein repair;GO:0042026, protein refolding	-
TRINITY_DN105260_c0_g1	GO:0001881, receptor recycling;GO:0005509, calcium ion binding;GO:0005524, ATP binding;GO:0005525, GTP binding;GO:0005622, intracellular;GO:0005737, cytoplasm;GO:0005829, cytosol;GO:0005925, focal adhesion;GO:0008289, lipid binding;GO:0020018, ciliary pocket membrane;GO:0030139, endocytic vesicle;GO:0032456, endocytic recycling;GO:0034498, early endosome to Golgi transport;GO:0043209, myelin shea…	-
TRINITY_DN27997_c0_g1	GO:0000293, ferric-chelate reductase activity;GO:0005886, plasma membrane;GO:0006879, cellular iron ion homeostasis;GO:0010039, response to iron ion;GO:0016021, integral component of membrane;GO:0016722, oxidoreductase activity, oxidizing metal ions;GO:0031526, brush border membrane;GO:0046872, metal ion binding;GO:0070062, extracellular exosome	-
TRINITY_DN21170_c0_g1	-	-
TRINITY_DN161674_c0_g1	-	-
TRINITY_DN140306_c0_g1	GO:0000145, exocyst;GO:0001927, exocyst assembly;GO:0051601, exocyst localization	-
TRINITY_DN156119_c0_g1	GO:0004872, receptor activity;GO:0005576, extracellular region;GO:0005789, endoplasmic reticulum membrane;GO:0005886, plasma membrane;GO:0009897, external side of plasma membrane;GO:0010008, endosome membrane;GO:0016021, integral component of membrane;GO:0022414, reproductive process;GO:0046872, metal ion binding;GO:1901998, toxin transport	-
TRINITY_DN141405_c0_g1	-	-
TRINITY_DN96883_c0_g1	-	-
TRINITY_DN52514_c0_g1	GO:0003735, structural constituent of ribosome;GO:0005840, ribosome;GO:0006412, translation	K02979-ko03010 Ribosome
TRINITY_DN79585_c0_g1	-	-
TRINITY_DN133625_c0_g1	-	-
TRINITY_DN215498_c0_g1	-	-
TRINITY_DN88233_c0_g3	GO:0003700, transcription factor activity, sequence-specific DNA binding;GO:0005622, intracellular;GO:0005634, nucleus;GO:0006355, regulation of transcription, DNA-templated;GO:0008270, zinc ion binding	-
TRINITY_DN88233_c0_g2	GO:0004725, protein tyrosine phosphatase activity;GO:0016791, phosphatase activity;GO:0030389, fructosamine metabolic process;GO:0046872, metal ion binding;GO:0070062, extracellular exosome	-
TRINITY_DN88233_c0_g1	GO:0003677, DNA binding;GO:0003680, AT DNA binding;GO:0005634, nucleus;GO:0005654, nucleoplasm;GO:0005730, nucleolus;GO:0005737, cytoplasm;GO:0005739, mitochondrion;GO:0006351, transcription, DNA-templated;GO:0006355, regulation of transcription, DNA-templated;GO:0043565, sequence-specific DNA binding;GO:0098687, chromosomal region	-
TRINITY_DN88233_c0_g7	-	-
TRINITY_DN88233_c0_g6	-	-
TRINITY_DN88233_c0_g5	-	-
TRINITY_DN88233_c0_g4	-	-
TRINITY_DN132617_c0_g1	GO:0003684, damaged DNA binding;GO:0005730, nucleolus;GO:0006289, nucleotide-excision repair;GO:0006298, mismatch repair	-
TRINITY_DN185545_c0_g1	-	-
TRINITY_DN99034_c0_g1	-	-
TRINITY_DN174664_c0_g1	-	-
TRINITY_DN61782_c0_g1	GO:0000329, fungal-type vacuole membrane;GO:0005524, ATP binding;GO:0005829, cytosol;GO:0007035, vacuolar acidification;GO:0015991, ATP hydrolysis coupled proton transport;GO:0033180, proton-transporting V-type ATPase, V1 domain;GO:0044267, cellular protein metabolic process;GO:0046034, ATP metabolic process;GO:0046961, proton-transporting ATPase activity, rotational mechanism;GO:0090463, lysine …	-
TRINITY_DN96210_c1_g2	GO:0001578, microtubule bundle formation;GO:0004672, protein kinase activity;GO:0004674, protein serine/threonine kinase activity;GO:0004714, transmembrane receptor protein tyrosine kinase activity;GO:0005496, steroid binding;GO:0005524, ATP binding;GO:0005768, endosome;GO:0005886, plasma membrane;GO:0009647, skotomorphogenesis;GO:0009729, detection of brassinosteroid stimulus;GO:0009742, brassin…	-
TRINITY_DN96210_c1_g3	GO:0001578, microtubule bundle formation;GO:0004672, protein kinase activity;GO:0004674, protein serine/threonine kinase activity;GO:0005496, steroid binding;GO:0005524, ATP binding;GO:0005768, endosome;GO:0005886, plasma membrane;GO:0006952, defense response;GO:0009647, skotomorphogenesis;GO:0009729, detection of brassinosteroid stimulus;GO:0009742, brassinosteroid mediated signaling pathway;GO:…	-
TRINITY_DN96210_c1_g1	GO:0001578, microtubule bundle formation;GO:0004672, protein kinase activity;GO:0004674, protein serine/threonine kinase activity;GO:0004714, transmembrane receptor protein tyrosine kinase activity;GO:0005496, steroid binding;GO:0005524, ATP binding;GO:0005768, endosome;GO:0005886, plasma membrane;GO:0009647, skotomorphogenesis;GO:0009729, detection of brassinosteroid stimulus;GO:0009742, brassin…	-
TRINITY_DN170005_c0_g1	-	-
TRINITY_DN126799_c0_g1	GO:0005737, cytoplasm;GO:0051321, meiotic cell cycle	-
TRINITY_DN174094_c0_g1	GO:0001671, ATPase activator activity;GO:0005524, ATP binding;GO:0005634, nucleus;GO:0005783, endoplasmic reticulum;GO:0006457, protein folding;GO:0009408, response to heat;GO:0030150, protein import into mitochondrial matrix;GO:0031307, integral component of mitochondrial outer membrane;GO:0046872, metal ion binding	-
TRINITY_DN113330_c0_g1	GO:0008879, glucose-1-phosphate thymidylyltransferase activity;GO:0045226, extracellular polysaccharide biosynthetic process;GO:0046872, metal ion binding	-
TRINITY_DN159326_c0_g1	GO:0000917, barrier septum assembly;GO:0004674, protein serine/threonine kinase activity;GO:0004707, MAP kinase activity;GO:0005524, ATP binding;GO:0005634, nucleus;GO:0005739, mitochondrion;GO:0005829, cytosol;GO:0005934, cellular bud tip;GO:0005935, cellular bud neck;GO:0006468, protein phosphorylation;GO:0007165, signal transduction;GO:0008361, regulation of cell size;GO:0009272, fungal-type c…	-
TRINITY_DN78062_c0_g1	GO:0005840, ribosome	-
TRINITY_DN100042_c0_g1	GO:0001568, blood vessel development;GO:0001822, kidney development;GO:0002040, sprouting angiogenesis;GO:0003723, RNA binding;GO:0003727, single-stranded RNA binding;GO:0004872, receptor activity;GO:0005506, iron ion binding;GO:0005634, nucleus;GO:0005654, nucleoplasm;GO:0005730, nucleolus;GO:0005829, cytosol;GO:0005886, plasma membrane;GO:0006351, transcription, DNA-templated;GO:0006355, regula…	-
TRINITY_DN94362_c1_g3	GO:0004630, phospholipase D activity;GO:0005509, calcium ion binding;GO:0005773, vacuole;GO:0005886, plasma membrane;GO:0009409, response to cold;GO:0009506, plasmodesma;GO:0009789, positive regulation of abscisic acid-activated signaling pathway;GO:0012501, programmed cell death;GO:0016020, membrane;GO:0016042, lipid catabolic process;GO:0046470, phosphatidylcholine metabolic process;GO:0046473,…	-
TRINITY_DN211823_c0_g1	-	-
TRINITY_DN190347_c0_g1	-	-
TRINITY_DN86752_c0_g2	-	-
TRINITY_DN86752_c0_g1	-	-
TRINITY_DN94362_c1_g1	GO:0003677, DNA binding;GO:0005634, nucleus;GO:0009626, plant-type hypersensitive response;GO:0009814, defense response, incompatible interaction;GO:0034052, positive regulation of plant-type hypersensitive response;GO:0043068, positive regulation of programmed cell death;GO:2000121, regulation of removal of superoxide radicals	-
TRINITY_DN176496_c0_g1	-	-
TRINITY_DN90424_c0_g1	-	-
TRINITY_DN82742_c5_g1	-	-
TRINITY_DN86885_c0_g4	GO:0009860, pollen tube growth;GO:0016567, protein ubiquitination;GO:0046872, metal ion binding	-
TRINITY_DN92908_c2_g2	-	-
TRINITY_DN92908_c2_g1	-	-
TRINITY_DN86885_c0_g1	GO:0009860, pollen tube growth;GO:0016567, protein ubiquitination	-
TRINITY_DN86885_c0_g2	-	-
TRINITY_DN86885_c0_g3	GO:0009860, pollen tube growth;GO:0016567, protein ubiquitination	-
TRINITY_DN158417_c0_g1	GO:0000978, RNA polymerase II core promoter proximal region sequence-specific DNA binding;GO:0001078, transcriptional repressor activity, RNA polymerase II core promoter proximal region sequence-specific binding;GO:0006366, transcription from RNA polymerase II promoter;GO:0032933, SREBP signaling pathway;GO:0032936, SREBP-SCAP complex;GO:0035961, positive regulation of ergosterol biosynthetic pro…	-
TRINITY_DN183244_c0_g1	-	-
TRINITY_DN199514_c0_g1	-	-
TRINITY_DN205038_c0_g1	GO:0004222, metalloendopeptidase activity;GO:0005524, ATP binding;GO:0005886, plasma membrane;GO:0008270, zinc ion binding;GO:0016020, membrane;GO:0016021, integral component of membrane;GO:0016887, ATPase activity;GO:0030163, protein catabolic process;GO:0051301, cell division	-
TRINITY_DN30177_c0_g1	-	-
TRINITY_DN117197_c0_g1	GO:0009809, lignin biosynthetic process;GO:0047763, caffeate O-methyltransferase activity	-
TRINITY_DN81436_c4_g5	GO:0000786, nucleosome;GO:0000790, nuclear chromatin;GO:0003677, DNA binding;GO:0005634, nucleus;GO:0006281, DNA repair;GO:0006342, chromatin silencing	-
TRINITY_DN131320_c0_g1	-	-
TRINITY_DN155677_c0_g1	-	-
TRINITY_DN199841_c0_g1	-	-
TRINITY_DN163898_c0_g1	GO:0005887, integral component of plasma membrane;GO:0008556, potassium-transporting ATPase activity;GO:0030955, potassium ion binding	-
TRINITY_DN218039_c0_g1	-	-
TRINITY_DN212527_c0_g1	-	-
TRINITY_DN150543_c0_g1	GO:0000166, nucleotide binding;GO:0000398, mRNA splicing, via spliceosome;GO:0003723, RNA binding;GO:0089701, U2AF	-
TRINITY_DN147209_c0_g1	GO:0005886, plasma membrane;GO:0005887, integral component of plasma membrane;GO:0006813, potassium ion transport;GO:0015299, solute:proton antiporter activity;GO:0015503, glutathione-regulated potassium exporter activity;GO:0015643, toxic substance binding;GO:0016021, integral component of membrane;GO:0051595, response to methylglyoxal	-
TRINITY_DN87318_c1_g1	-	-
TRINITY_DN84790_c2_g9	-	-
TRINITY_DN84790_c2_g8	GO:0008565, protein transporter activity;GO:0016021, integral component of membrane	K12275-ko04141 Protein processing in endoplasmic reticulum;ko03060 Protein export
TRINITY_DN84790_c2_g5	GO:0003677, DNA binding;GO:0003723, RNA binding;GO:0006355, regulation of transcription, DNA-templated;GO:0008270, zinc ion binding	-
TRINITY_DN84790_c2_g4	GO:0016787, hydrolase activity;GO:0046856, phosphatidylinositol dephosphorylation	-
TRINITY_DN84790_c2_g7	-	-
TRINITY_DN84790_c2_g6	-	-
TRINITY_DN84790_c2_g1	-	-
TRINITY_DN87318_c1_g3	-	-
TRINITY_DN84790_c2_g3	-	-
TRINITY_DN84790_c2_g2	GO:0000166, nucleotide binding;GO:0005737, cytoplasm;GO:0008252, nucleotidase activity;GO:0008253, 5'-nucleotidase activity;GO:0046872, metal ion binding	K03787-ko00760 Nicotinate and nicotinamide metabolism;ko00240 Pyrimidine metabolism;ko00230 Purine metabolism
TRINITY_DN93335_c0_g1	-	-
TRINITY_DN7358_c0_g1	GO:0010189, vitamin E biosynthetic process;GO:0051741, 2-methyl-6-phytyl-1,4-benzoquinone methyltransferase activity	-
TRINITY_DN87318_c1_g2	-	-
TRINITY_DN80042_c0_g1	-	-
TRINITY_DN219308_c0_g1	GO:0003937, IMP cyclohydrolase activity;GO:0004643, phosphoribosylaminoimidazolecarboxamide formyltransferase activity;GO:0006189, 'de novo' IMP biosynthetic process	-
TRINITY_DN166800_c0_g1	GO:0005634, nucleus;GO:0006355, regulation of transcription, DNA-templated;GO:0007219, Notch signaling pathway;GO:0008270, zinc ion binding;GO:0008587, imaginal disc-derived wing margin morphogenesis;GO:0045944, positive regulation of transcription from RNA polymerase II promoter;GO:0048190, wing disc dorsal/ventral pattern formation	-
TRINITY_DN85988_c0_g5	GO:0016021, integral component of membrane;GO:0046872, metal ion binding	-
TRINITY_DN110858_c0_g1	GO:0016021, integral component of membrane	-
TRINITY_DN106953_c0_g1	GO:0016021, integral component of membrane;GO:0072546, ER membrane protein complex	-
TRINITY_DN85988_c0_g4	-	-
TRINITY_DN90937_c1_g2	GO:0003841, 1-acylglycerol-3-phosphate O-acyltransferase activity;GO:0008152, metabolic process;GO:0016021, integral component of membrane;GO:0016024, CDP-diacylglycerol biosynthetic process;GO:0016746, transferase activity, transferring acyl groups	-
TRINITY_DN90937_c1_g3	-	-
TRINITY_DN90937_c1_g1	GO:0003841, 1-acylglycerol-3-phosphate O-acyltransferase activity;GO:0008152, metabolic process;GO:0016021, integral component of membrane;GO:0016024, CDP-diacylglycerol biosynthetic process;GO:0016746, transferase activity, transferring acyl groups	K13513-ko00561 Glycerolipid metabolism;ko00564 Glycerophospholipid metabolism
TRINITY_DN139766_c0_g1	GO:0000104, succinate dehydrogenase activity;GO:0005634, nucleus;GO:0005737, cytoplasm;GO:0005739, mitochondrion;GO:0005829, cytosol;GO:0006099, tricarboxylic acid cycle;GO:0006106, fumarate metabolic process;GO:0016156, fumarate reductase (NADH) activity	-
TRINITY_DN90937_c1_g4	GO:0003841, 1-acylglycerol-3-phosphate O-acyltransferase activity;GO:0016021, integral component of membrane;GO:0016024, CDP-diacylglycerol biosynthetic process	-
TRINITY_DN90937_c1_g5	-	-
TRINITY_DN81085_c2_g1	GO:0001569, branching involved in blood vessel morphogenesis;GO:0005201, extracellular matrix structural constituent;GO:0005576, extracellular region;GO:0005581, collagen trimer;GO:0005587, collagen type IV trimer;GO:0005604, basement membrane;GO:0005788, endoplasmic reticulum lumen;GO:0007420, brain development;GO:0007528, neuromuscular junction development;GO:0030023, extracellular matrix const…	-
TRINITY_DN91899_c3_g1	-	-
TRINITY_DN207918_c0_g1	-	-
TRINITY_DN163509_c0_g1	GO:0004872, receptor activity;GO:0006810, transport;GO:0009279, cell outer membrane	-
TRINITY_DN84779_c0_g8	GO:0000932, P-body;GO:0005634, nucleus;GO:0005829, cytosol;GO:0006397, mRNA processing;GO:0006402, mRNA catabolic process;GO:0009791, post-embryonic development;GO:0009965, leaf morphogenesis;GO:0010071, root meristem specification;GO:0010072, primary shoot apical meristem specification;GO:0031087, deadenylation-independent decapping of nuclear-transcribed mRNA;GO:0071365, cellular response to au…	-
TRINITY_DN136504_c0_g1	-	-
TRINITY_DN64999_c0_g1	-	-
TRINITY_DN182592_c0_g1	-	-
TRINITY_DN86876_c6_g4	-	-
TRINITY_DN142626_c0_g1	-	-
TRINITY_DN130286_c0_g1	-	-
TRINITY_DN103274_c0_g1	-	-
TRINITY_DN141145_c0_g1	-	-
TRINITY_DN87280_c3_g4	-	-
TRINITY_DN161369_c0_g1	-	-
TRINITY_DN87280_c3_g1	GO:0005829, cytosol;GO:0016491, oxidoreductase activity;GO:0055114, oxidation-reduction process	-
TRINITY_DN87280_c3_g3	-	-
TRINITY_DN87280_c3_g2	-	-
TRINITY_DN153005_c0_g1	GO:0005789, endoplasmic reticulum membrane;GO:0008237, metallopeptidase activity;GO:0016020, membrane;GO:0016021, integral component of membrane;GO:0046872, metal ion binding	-
TRINITY_DN87376_c0_g1	GO:0006396, RNA processing;GO:0035194, posttranscriptional gene silencing by RNA	-
TRINITY_DN95591_c0_g8	-	-
TRINITY_DN95591_c0_g9	-	-
TRINITY_DN95591_c0_g6	GO:0005342, organic acid transmembrane transporter activity;GO:0005887, integral component of plasma membrane;GO:0015103, inorganic anion transmembrane transporter activity;GO:0015104, antimonite transmembrane transporter activity;GO:0015105, arsenite transmembrane transporter activity;GO:0015297, antiporter activity;GO:0015699, antimonite transport;GO:0015700, arsenite transport;GO:0016021, inte…	-
TRINITY_DN95591_c0_g7	GO:0004061, arylformamidase activity;GO:0019441, tryptophan catabolic process to kynurenine	-
TRINITY_DN95591_c0_g4	GO:0003700, transcription factor activity, sequence-specific DNA binding;GO:0004674, protein serine/threonine kinase activity;GO:0005524, ATP binding;GO:0005634, nucleus;GO:0006351, transcription, DNA-templated;GO:0006952, defense response;GO:0007165, signal transduction;GO:0009941, chloroplast envelope;GO:0043531, ADP binding;GO:0043565, sequence-specific DNA binding	-
TRINITY_DN95591_c0_g5	-	-
TRINITY_DN62950_c0_g1	GO:0000226, microtubule cytoskeleton organization;GO:0000910, cytokinesis;GO:0003677, DNA binding;GO:0003723, RNA binding;GO:0005654, nucleoplasm;GO:0006351, transcription, DNA-templated;GO:0006355, regulation of transcription, DNA-templated;GO:0006397, mRNA processing;GO:0008380, RNA splicing;GO:0016607, nuclear speck;GO:0043066, negative regulation of apoptotic process;GO:0043484, regulation of…	-
TRINITY_DN95591_c0_g3	-	-
TRINITY_DN121286_c0_g1	-	-
TRINITY_DN95591_c0_g1	GO:0003700, transcription factor activity, sequence-specific DNA binding;GO:0004674, protein serine/threonine kinase activity;GO:0005524, ATP binding;GO:0005634, nucleus;GO:0006351, transcription, DNA-templated;GO:0006952, defense response;GO:0007165, signal transduction;GO:0009941, chloroplast envelope;GO:0043531, ADP binding;GO:0043565, sequence-specific DNA binding	-
TRINITY_DN154097_c0_g1	GO:0003333, amino acid transmembrane transport;GO:0005794, Golgi apparatus;GO:0015174, basic amino acid transmembrane transporter activity;GO:0016021, integral component of membrane;GO:0032153, cell division site;GO:0051286, cell tip	-
TRINITY_DN79141_c0_g2	GO:0003688, DNA replication origin binding;GO:0003697, single-stranded DNA binding;GO:0005524, ATP binding;GO:0005758, mitochondrial intermembrane space;GO:0006458, 'de novo' protein folding;GO:0016887, ATPase activity;GO:0031966, mitochondrial membrane;GO:0042026, protein refolding;GO:0042645, mitochondrial nucleoid;GO:0045041, protein import into mitochondrial intermembrane space;GO:0050821, pr…	-
TRINITY_DN79141_c0_g1	GO:0003688, DNA replication origin binding;GO:0003697, single-stranded DNA binding;GO:0005524, ATP binding;GO:0005758, mitochondrial intermembrane space;GO:0005759, mitochondrial matrix;GO:0006458, 'de novo' protein folding;GO:0016887, ATPase activity;GO:0031966, mitochondrial membrane;GO:0042026, protein refolding;GO:0042645, mitochondrial nucleoid;GO:0045041, protein import into mitochondrial i…	-
TRINITY_DN110825_c0_g1	GO:0005737, cytoplasm;GO:0005794, Golgi apparatus;GO:0005856, cytoskeleton;GO:0005886, plasma membrane;GO:0017137, Rab GTPase binding;GO:0031410, cytoplasmic vesicle;GO:0072385, minus-end-directed organelle transport along microtubule;GO:0072393, microtubule anchoring at microtubule organizing center	-
TRINITY_DN58428_c0_g1	-	-
TRINITY_DN71074_c0_g1	GO:0000111, nucleotide-excision repair factor 2 complex;GO:0000502, proteasome complex;GO:0003684, damaged DNA binding;GO:0005635, nuclear envelope;GO:0005829, cytosol;GO:0006289, nucleotide-excision repair;GO:0006517, protein deglycosylation;GO:0016567, protein ubiquitination;GO:0030433, ubiquitin-dependent ERAD pathway;GO:0042177, negative regulation of protein catabolic process	-
TRINITY_DN97576_c4_g1	-	-
TRINITY_DN34182_c0_g1	-	-
TRINITY_DN59371_c0_g1	GO:0005524, ATP binding;GO:0005886, plasma membrane;GO:0015658, branched-chain amino acid transmembrane transporter activity;GO:0016887, ATPase activity	-
TRINITY_DN104983_c0_g1	GO:0004872, receptor activity;GO:0006810, transport;GO:0009279, cell outer membrane	-
TRINITY_DN208937_c0_g1	GO:0000162, tryptophan biosynthetic process;GO:0004049, anthranilate synthase activity;GO:0004425, indole-3-glycerol-phosphate synthase activity;GO:0004640, phosphoribosylanthranilate isomerase activity;GO:0006541, glutamine metabolic process;GO:0016740, transferase activity	-
TRINITY_DN175484_c0_g1	GO:0005524, ATP binding;GO:0005730, nucleolus;GO:0006364, rRNA processing;GO:0008033, tRNA processing;GO:0008080, N-acetyltransferase activity;GO:0016021, integral component of membrane	K14521-ko03008 Ribosome biogenesis in eukaryotes
TRINITY_DN191069_c0_g1	-	-
TRINITY_DN95112_c0_g1	-	-
TRINITY_DN123739_c0_g1	-	-
TRINITY_DN168735_c0_g1	GO:0004553, hydrolase activity, hydrolyzing O-glycosyl compounds;GO:0005975, carbohydrate metabolic process	-
TRINITY_DN84889_c5_g1	-	-
TRINITY_DN219797_c0_g1	GO:0001671, ATPase activator activity;GO:0001933, negative regulation of protein phosphorylation;GO:0005788, endoplasmic reticulum lumen;GO:0015035, protein disulfide oxidoreductase activity;GO:0016021, integral component of membrane;GO:0016671, oxidoreductase activity, acting on a sulfur group of donors, disulfide as acceptor;GO:0030433, ubiquitin-dependent ERAD pathway;GO:0034663, endoplasmic r…	-
TRINITY_DN198935_c0_g1	-	-
TRINITY_DN32903_c0_g1	GO:0005886, plasma membrane;GO:0016021, integral component of membrane	-
TRINITY_DN105751_c0_g1	GO:0001533, cornified envelope;GO:0001780, neutrophil homeostasis;GO:0001891, phagocytic cup;GO:0002250, adaptive immune response;GO:0002548, monocyte chemotaxis;GO:0002685, regulation of leukocyte migration;GO:0003697, single-stranded DNA binding;GO:0003727, single-stranded RNA binding;GO:0004386, helicase activity;GO:0005198, structural molecule activity;GO:0005509, calcium ion binding;GO:00055…	-
TRINITY_DN66097_c0_g1	GO:0003735, structural constituent of ribosome;GO:0005840, ribosome;GO:0006412, translation;GO:0022627, cytosolic small ribosomal subunit	-
TRINITY_DN144700_c0_g1	-	-
TRINITY_DN87035_c1_g1	-	-
TRINITY_DN86396_c1_g1	-	-
TRINITY_DN86396_c1_g2	-	-
TRINITY_DN87035_c1_g2	GO:0004674, protein serine/threonine kinase activity;GO:0005524, ATP binding;GO:0005886, plasma membrane;GO:0009505, plant-type cell wall;GO:0009506, plasmodesma;GO:0009555, pollen development;GO:0016021, integral component of membrane	-
TRINITY_DN87035_c1_g5	-	-
TRINITY_DN62234_c0_g1	-	-
TRINITY_DN87035_c1_g6	-	-
TRINITY_DN168048_c0_g1	GO:0005634, nucleus	-
TRINITY_DN162834_c0_g1	GO:0005739, mitochondrion;GO:0005759, mitochondrial matrix;GO:0006554, lysine catabolic process;GO:0008483, transaminase activity;GO:0016829, lyase activity;GO:0030170, pyridoxal phosphate binding;GO:0030574, collagen catabolic process;GO:0042802, identical protein binding	-
TRINITY_DN215782_c0_g1	GO:0000160, phosphorelay signal transduction system;GO:0005622, intracellular	-
TRINITY_DN84479_c2_g3	-	-
TRINITY_DN118350_c0_g1	GO:0005634, nucleus;GO:0005829, cytosol;GO:0008270, zinc ion binding;GO:0009524, phragmoplast	-
TRINITY_DN81565_c11_g1	-	-
TRINITY_DN93718_c1_g1	GO:0030001, metal ion transport;GO:0046872, metal ion binding	-
TRINITY_DN93718_c1_g2	GO:0006855, drug transmembrane transport;GO:0009507, chloroplast;GO:0009941, chloroplast envelope;GO:0015238, drug transmembrane transporter activity;GO:0015297, antiporter activity;GO:0016021, integral component of membrane;GO:0031969, chloroplast membrane	-
TRINITY_DN93718_c1_g3	GO:0006855, drug transmembrane transport;GO:0009507, chloroplast;GO:0009941, chloroplast envelope;GO:0015238, drug transmembrane transporter activity;GO:0015297, antiporter activity;GO:0016021, integral component of membrane;GO:0031969, chloroplast membrane	-
TRINITY_DN93718_c1_g4	-	-
TRINITY_DN93718_c1_g5	-	-
TRINITY_DN93718_c1_g6	GO:0004553, hydrolase activity, hydrolyzing O-glycosyl compounds;GO:0005975, carbohydrate metabolic process	-
TRINITY_DN93718_c1_g7	-	-
TRINITY_DN93718_c1_g8	-	-
TRINITY_DN93718_c1_g9	-	-
TRINITY_DN41295_c0_g1	GO:0016021, integral component of membrane	-
TRINITY_DN137041_c0_g1	-	-
TRINITY_DN1227_c0_g1	-	-
TRINITY_DN15043_c0_g1	-	-
TRINITY_DN166857_c0_g1	GO:0005829, cytosol	-
TRINITY_DN23612_c0_g1	GO:0001678, cellular glucose homeostasis;GO:0004340, glucokinase activity;GO:0004396, hexokinase activity;GO:0005524, ATP binding;GO:0005536, glucose binding;GO:0005623, cell;GO:0005829, cytosol;GO:0006096, glycolytic process;GO:0008865, fructokinase activity;GO:0019158, mannokinase activity;GO:0019318, hexose metabolic process	-
TRINITY_DN186717_c0_g1	GO:0008718, D-amino-acid dehydrogenase activity;GO:0055130, D-alanine catabolic process	-
TRINITY_DN89943_c0_g1	-	-
TRINITY_DN124828_c0_g1	GO:0000103, sulfate assimilation;GO:0005623, cell;GO:0005737, cytoplasm;GO:0006457, protein folding;GO:0006662, glycerol ether metabolic process;GO:0015035, protein disulfide oxidoreductase activity;GO:0016671, oxidoreductase activity, acting on a sulfur group of donors, disulfide as acceptor;GO:0034599, cellular response to oxidative stress;GO:0045454, cell redox homeostasis;GO:0055114, oxidatio…	-
TRINITY_DN154783_c0_g1	-	-
TRINITY_DN157661_c0_g1	GO:0004476, mannose-6-phosphate isomerase activity;GO:0005829, cytosol;GO:0008270, zinc ion binding;GO:0009298, GDP-mannose biosynthetic process;GO:0061611, mannose to fructose-6-phosphate metabolic process;GO:0070062, extracellular exosome	-
TRINITY_DN57719_c0_g1	-	-
TRINITY_DN186039_c0_g1	GO:0004100, chitin synthase activity;GO:0005886, plasma membrane;GO:0016021, integral component of membrane;GO:0016758, transferase activity, transferring hexosyl groups;GO:0071555, cell wall organization	-
TRINITY_DN42103_c0_g1	GO:0004373, glycogen (starch) synthase activity;GO:0005982, starch metabolic process;GO:0009011, starch synthase activity;GO:0009501, amyloplast;GO:0009507, chloroplast;GO:0019252, starch biosynthetic process;GO:0033201, alpha-1,4-glucan synthase activity	-
TRINITY_DN107721_c0_g1	-	-
TRINITY_DN90163_c0_g10	GO:0004497, monooxygenase activity;GO:0004499, N,N-dimethylaniline monooxygenase activity;GO:0005773, vacuole;GO:0050660, flavin adenine dinucleotide binding;GO:0050661, NADP binding;GO:0055114, oxidation-reduction process	-
TRINITY_DN73980_c0_g1	-	-
TRINITY_DN90163_c0_g12	-	-
TRINITY_DN96732_c1_g1	-	-
TRINITY_DN84468_c1_g2	-	-
TRINITY_DN85974_c1_g6	GO:0005524, ATP binding;GO:0005737, cytoplasm;GO:0006260, DNA replication;GO:0006457, protein folding;GO:0008270, zinc ion binding;GO:0009408, response to heat	-
TRINITY_DN85974_c1_g5	-	-
TRINITY_DN84468_c1_g1	-	-
TRINITY_DN85974_c1_g3	-	-
TRINITY_DN85974_c1_g2	GO:0005829, cytosol;GO:0006457, protein folding;GO:0030544, Hsp70 protein binding	-
TRINITY_DN85974_c1_g1	GO:0005216, ion channel activity;GO:0005249, voltage-gated potassium channel activity;GO:0005886, plasma membrane;GO:0005887, integral component of plasma membrane;GO:0030552, cAMP binding;GO:0030553, cGMP binding;GO:0042391, regulation of membrane potential	-
TRINITY_DN31599_c0_g1	GO:0005522, profilin binding;GO:0005737, cytoplasm;GO:0005829, cytosol;GO:0005856, cytoskeleton;GO:0005925, focal adhesion;GO:0007015, actin filament organization;GO:0007166, cell surface receptor signaling pathway;GO:0007399, nervous system development;GO:0007411, axon guidance;GO:0008154, actin polymerization or depolymerization;GO:0009887, animal organ morphogenesis;GO:0010633, negative regula…	-
TRINITY_DN216182_c0_g1	-	-
TRINITY_DN85974_c1_g9	-	-
TRINITY_DN85974_c1_g8	-	-
TRINITY_DN46255_c0_g1	-	-
TRINITY_DN84771_c2_g1	-	-
TRINITY_DN128471_c0_g1	-	-
TRINITY_DN85352_c2_g1	-	-
TRINITY_DN85352_c2_g2	-	-
TRINITY_DN214720_c0_g1	-	-
TRINITY_DN101287_c0_g1	-	-
TRINITY_DN158550_c0_g1	-	-
TRINITY_DN58375_c0_g1	-	-
TRINITY_DN129886_c0_g1	-	-
TRINITY_DN184317_c0_g1	-	-
TRINITY_DN188288_c0_g1	-	-
TRINITY_DN162875_c0_g1	-	-
TRINITY_DN89777_c0_g5	GO:0004349, glutamate 5-kinase activity;GO:0004350, glutamate-5-semialdehyde dehydrogenase activity;GO:0005524, ATP binding;GO:0005737, cytoplasm;GO:0006561, proline biosynthetic process;GO:0055129, L-proline biosynthetic process	K12657-ko00330 Arginine and proline metabolism;ko01230 Biosynthesis of amino acids
TRINITY_DN89777_c0_g4	GO:0004672, protein kinase activity;GO:0004674, protein serine/threonine kinase activity;GO:0005524, ATP binding;GO:0005886, plasma membrane;GO:0016021, integral component of membrane	-
TRINITY_DN92209_c0_g1	GO:0005886, plasma membrane;GO:0009414, response to water deprivation;GO:0009630, gravitropism;GO:0009705, plant-type vacuole membrane;GO:0010540, basipetal auxin transport;GO:0016021, integral component of membrane;GO:0022821, potassium ion antiporter activity;GO:0048364, root development;GO:0080167, response to karrikin;GO:0090333, regulation of stomatal closure	-
TRINITY_DN89777_c0_g1	GO:0004349, glutamate 5-kinase activity;GO:0004350, glutamate-5-semialdehyde dehydrogenase activity;GO:0005524, ATP binding;GO:0005737, cytoplasm;GO:0006561, proline biosynthetic process;GO:0055129, L-proline biosynthetic process	K12657-ko00330 Arginine and proline metabolism;ko01230 Biosynthesis of amino acids
TRINITY_DN89777_c0_g3	-	-
TRINITY_DN89777_c0_g2	GO:0005783, endoplasmic reticulum;GO:0009705, plant-type vacuole membrane;GO:0016021, integral component of membrane	-
TRINITY_DN183929_c0_g1	-	-
TRINITY_DN146179_c0_g1	-	-
TRINITY_DN143090_c0_g1	GO:0000122, negative regulation of transcription from RNA polymerase II promoter;GO:0001849, complement component C1q binding;GO:0003714, transcription corepressor activity;GO:0003729, mRNA binding;GO:0005540, hyaluronic acid binding;GO:0005576, extracellular region;GO:0005615, extracellular space;GO:0005634, nucleus;GO:0005730, nucleolus;GO:0005737, cytoplasm;GO:0005739, mitochondrion;GO:0005759…	-
TRINITY_DN44933_c0_g1	GO:0016491, oxidoreductase activity	-
TRINITY_DN160428_c0_g1	GO:0000049, tRNA binding;GO:0004813, alanine-tRNA ligase activity;GO:0005524, ATP binding;GO:0005737, cytoplasm;GO:0006419, alanyl-tRNA aminoacylation;GO:0008270, zinc ion binding	-
TRINITY_DN79557_c1_g2	-	-
TRINITY_DN212936_c0_g1	-	-
TRINITY_DN177417_c0_g1	-	-
TRINITY_DN52355_c0_g1	GO:0000139, Golgi membrane;GO:0000329, fungal-type vacuole membrane;GO:0004609, phosphatidylserine decarboxylase activity;GO:0005509, calcium ion binding;GO:0005543, phospholipid binding;GO:0005795, Golgi stack;GO:0005829, cytosol;GO:0006646, phosphatidylethanolamine biosynthetic process;GO:0006656, phosphatidylcholine biosynthetic process;GO:0010008, endosome membrane;GO:0016540, protein autopro…	K01613-ko00564 Glycerophospholipid metabolism
TRINITY_DN82021_c3_g1	-	-
TRINITY_DN106674_c0_g1	-	-
TRINITY_DN44056_c0_g1	GO:0003779, actin binding;GO:0005737, cytoplasm;GO:0005886, plasma membrane;GO:0005925, focal adhesion;GO:0008092, cytoskeletal protein binding;GO:0015629, actin cytoskeleton;GO:0016528, sarcoplasm;GO:0030018, Z disc;GO:0030029, actin filament-based process;GO:0030506, ankyrin binding;GO:0042383, sarcolemma;GO:0048747, muscle fiber development	-
TRINITY_DN142206_c0_g1	GO:0004590, orotidine-5'-phosphate decarboxylase activity;GO:0006207, 'de novo' pyrimidine nucleobase biosynthetic process;GO:0044205, 'de novo' UMP biosynthetic process	-
TRINITY_DN91714_c2_g1	GO:0003676, nucleic acid binding;GO:0004523, RNA-DNA hybrid ribonuclease activity;GO:0046872, metal ion binding	-
TRINITY_DN60278_c0_g1	-	-
TRINITY_DN216107_c0_g1	-	-
TRINITY_DN82380_c1_g4	-	-
TRINITY_DN189363_c0_g1	GO:0003746, translation elongation factor activity;GO:0004364, glutathione transferase activity;GO:0005634, nucleus;GO:0005737, cytoplasm;GO:0005783, endoplasmic reticulum;GO:0006749, glutathione metabolic process;GO:0009615, response to virus;GO:0016020, membrane;GO:0070062, extracellular exosome	-
TRINITY_DN82380_c1_g1	-	-
TRINITY_DN82380_c1_g3	-	-
TRINITY_DN82380_c1_g2	-	-
TRINITY_DN127324_c0_g1	GO:0000187, activation of MAPK activity;GO:0001669, acrosomal vesicle;GO:0005518, collagen binding;GO:0005886, plasma membrane;GO:0005925, focal adhesion;GO:0006936, muscle contraction;GO:0007155, cell adhesion;GO:0007160, cell-matrix adhesion;GO:0007229, integrin-mediated signaling pathway;GO:0008285, negative regulation of cell proliferation;GO:0008305, integrin complex;GO:0009897, external sid…	-
TRINITY_DN114229_c0_g1	GO:0005215, transporter activity;GO:0005524, ATP binding;GO:0005739, mitochondrion;GO:0005743, mitochondrial inner membrane;GO:0016021, integral component of membrane;GO:0032592, integral component of mitochondrial membrane;GO:0042626, ATPase activity, coupled to transmembrane movement of substances;GO:0042803, protein homodimerization activity;GO:0055085, transmembrane transport	-
TRINITY_DN188629_c0_g1	GO:0000287, magnesium ion binding;GO:0004012, phospholipid-translocating ATPase activity;GO:0005524, ATP binding;GO:0016021, integral component of membrane	-
TRINITY_DN91676_c2_g2	GO:0000165, MAPK cascade;GO:0000209, protein polyubiquitination;GO:0000502, proteasome complex;GO:0002223, stimulatory C-type lectin receptor signaling pathway;GO:0002479, antigen processing and presentation of exogenous peptide antigen via MHC class I, TAP-dependent;GO:0005634, nucleus;GO:0005654, nucleoplasm;GO:0005737, cytoplasm;GO:0005829, cytosol;GO:0006521, regulation of cellular amino acid…	-
TRINITY_DN87860_c0_g2	GO:0004674, protein serine/threonine kinase activity;GO:0005516, calmodulin binding;GO:0005524, ATP binding;GO:0005886, plasma membrane;GO:0006468, protein phosphorylation;GO:0016021, integral component of membrane;GO:0030246, carbohydrate binding;GO:0048544, recognition of pollen	-
TRINITY_DN72153_c0_g1	-	-
TRINITY_DN91676_c2_g1	GO:0000502, proteasome complex;GO:0005634, nucleus;GO:0005654, nucleoplasm;GO:0005737, cytoplasm;GO:0005829, cytosol;GO:0006511, ubiquitin-dependent protein catabolic process;GO:0008134, transcription factor binding;GO:0008540, proteasome regulatory particle, base subcomplex;GO:0022624, proteasome accessory complex;GO:0031593, polyubiquitin binding;GO:0042044, fluid transport;GO:0042802, identica…	-
TRINITY_DN81953_c1_g2	GO:0005524, ATP binding;GO:0005634, nucleus;GO:0005856, cytoskeleton;GO:0007049, cell cycle;GO:0009524, phragmoplast;GO:0015031, protein transport;GO:0051301, cell division	-
TRINITY_DN81953_c1_g1	GO:0005524, ATP binding;GO:0005634, nucleus;GO:0005856, cytoskeleton;GO:0007049, cell cycle;GO:0009524, phragmoplast;GO:0015031, protein transport;GO:0051301, cell division	-
TRINITY_DN78917_c0_g1	GO:0005634, nucleus	-
TRINITY_DN149224_c0_g1	-	-
TRINITY_DN160249_c0_g1	GO:0005509, calcium ion binding;GO:0006069, ethanol oxidation;GO:0016020, membrane;GO:0016491, oxidoreductase activity;GO:0018468, alcohol dehydrogenase (acceptor) activity;GO:0030288, outer membrane-bounded periplasmic space;GO:0052935, ethanol:cytochrome c oxidoreductase activity;GO:0052936, 2-chloroethanol:cytochrome c oxidoreductase activity	-
TRINITY_DN192345_c0_g1	GO:0004185, serine-type carboxypeptidase activity;GO:0005794, Golgi apparatus;GO:0006915, apoptotic process;GO:0016021, integral component of membrane;GO:0030448, hyphal growth;GO:0075307, positive regulation of conidium formation	-
TRINITY_DN165849_c0_g1	GO:0016021, integral component of membrane;GO:0055085, transmembrane transport	-
TRINITY_DN61860_c0_g1	-	-
TRINITY_DN165958_c0_g1	-	-
TRINITY_DN89561_c0_g3	-	-
TRINITY_DN122299_c0_g1	GO:0005506, iron ion binding;GO:0005737, cytoplasm;GO:0006400, tRNA modification;GO:0016740, transferase activity;GO:0051539, 4 iron, 4 sulfur cluster binding	-
TRINITY_DN75880_c0_g1	-	-
TRINITY_DN95090_c0_g1	-	-
TRINITY_DN216049_c0_g1	-	-
TRINITY_DN160410_c0_g1	GO:0005524, ATP binding;GO:0005788, endoplasmic reticulum lumen;GO:0006457, protein folding;GO:0006950, response to stress	-
TRINITY_DN85122_c0_g4	GO:0005509, calcium ion binding;GO:0009733, response to auxin	-
TRINITY_DN117055_c0_g1	-	-
TRINITY_DN132093_c0_g1	-	-
TRINITY_DN15446_c0_g1	-	-
TRINITY_DN120090_c0_g1	GO:0016021, integral component of membrane	-
TRINITY_DN3271_c0_g1	-	-
TRINITY_DN122620_c0_g1	GO:0005737, cytoplasm;GO:0006166, purine ribonucleoside salvage;GO:0017061, S-methyl-5-thioadenosine phosphorylase activity;GO:0043101, purine-containing compound salvage	-
TRINITY_DN208284_c0_g1	-	-
TRINITY_DN207464_c0_g1	-	-
TRINITY_DN133559_c0_g1	GO:0000790, nuclear chromatin;GO:0004672, protein kinase activity;GO:0004674, protein serine/threonine kinase activity;GO:0005524, ATP binding;GO:0005737, cytoplasm;GO:0005829, cytosol;GO:0006281, DNA repair;GO:0007165, signal transduction;GO:0010507, negative regulation of autophagy;GO:0010515, negative regulation of induction of conjugation with cellular fusion;GO:0018107, peptidyl-threonine ph…	-
TRINITY_DN212220_c0_g1	-	-
TRINITY_DN154229_c0_g1	-	-
TRINITY_DN41157_c0_g1	-	-
TRINITY_DN214791_c0_g1	GO:0003779, actin binding;GO:0005737, cytoplasm;GO:0005765, lysosomal membrane;GO:0005768, endosome;GO:0006886, intracellular protein transport;GO:0007033, vacuole organization;GO:0009705, plant-type vacuole membrane;GO:0016197, endosomal transport;GO:0030897, HOPS complex;GO:0031902, late endosome membrane;GO:0032889, regulation of vacuole fusion, non-autophagic;GO:0035542, regulation of SNARE c…	-
TRINITY_DN14768_c0_g1	-	-
TRINITY_DN60205_c0_g1	GO:0000050, urea cycle;GO:0000053, argininosuccinate metabolic process;GO:0004055, argininosuccinate synthase activity;GO:0005524, ATP binding;GO:0005737, cytoplasm;GO:0005829, cytosol;GO:0006526, arginine biosynthetic process	-
TRINITY_DN218048_c0_g1	-	-
TRINITY_DN96930_c1_g3	-	-
TRINITY_DN96930_c1_g2	-	-
TRINITY_DN96930_c1_g1	-	-
TRINITY_DN180188_c0_g1	GO:0003735, structural constituent of ribosome;GO:0006412, translation;GO:0015934, large ribosomal subunit	-
TRINITY_DN96930_c1_g4	-	-
TRINITY_DN168382_c0_g1	GO:0000917, barrier septum assembly;GO:0000923, equatorial microtubule organizing center;GO:0000930, gamma-tubulin complex;GO:0005200, structural constituent of cytoskeleton;GO:0005634, nucleus;GO:0005829, cytosol;GO:0005874, microtubule;GO:0007020, microtubule nucleation;GO:0007126, meiotic nuclear division;GO:0008275, gamma-tubulin small complex;GO:0031021, interphase microtubule organizing cen…	-
TRINITY_DN2272_c0_g1	-	-
TRINITY_DN4364_c0_g1	GO:0004872, receptor activity;GO:0005506, iron ion binding;GO:0009279, cell outer membrane;GO:0015891, siderophore transport	-
TRINITY_DN75580_c0_g1	GO:0000139, Golgi membrane;GO:0016021, integral component of membrane;GO:0016192, vesicle-mediated transport;GO:0030173, integral component of Golgi membrane	-
TRINITY_DN85177_c4_g1	-	-
TRINITY_DN167066_c0_g1	GO:0004335, galactokinase activity;GO:0005524, ATP binding;GO:0005737, cytoplasm;GO:0005829, cytosol;GO:0006012, galactose metabolic process;GO:0016301, kinase activity;GO:0016773, phosphotransferase activity, alcohol group as acceptor;GO:0046835, carbohydrate phosphorylation;GO:0046872, metal ion binding	-
TRINITY_DN151423_c0_g1	GO:0005886, plasma membrane;GO:0006849, plasma membrane pyruvate transport;GO:0015144, carbohydrate transmembrane transporter activity;GO:0015355, secondary active monocarboxylate transmembrane transporter activity;GO:0016021, integral component of membrane;GO:0022857, transmembrane transporter activity;GO:0035879, plasma membrane lactate transport;GO:0097079, selenite:proton symporter activity;G…	-
TRINITY_DN155345_c0_g1	GO:0000139, Golgi membrane;GO:0001525, angiogenesis;GO:0005737, cytoplasm;GO:0005794, Golgi apparatus;GO:0005829, cytosol;GO:0005886, plasma membrane;GO:0008284, positive regulation of cell proliferation;GO:0010628, positive regulation of gene expression;GO:0010629, negative regulation of gene expression;GO:0019901, protein kinase binding;GO:0030335, positive regulation of cell migration;GO:00328…	-
TRINITY_DN192514_c0_g1	GO:0016021, integral component of membrane	-
TRINITY_DN84251_c0_g1	-	-
TRINITY_DN97856_c0_g1	GO:0005905, clathrin-coated pit;GO:0006886, intracellular protein transport;GO:0006897, endocytosis;GO:0016192, vesicle-mediated transport;GO:0030122, AP-2 adaptor complex;GO:0030131, clathrin adaptor complex;GO:0030132, clathrin coat of coated pit;GO:0031201, SNARE complex	-
TRINITY_DN155250_c0_g1	-	-
TRINITY_DN200786_c0_g1	GO:0000727, double-strand break repair via break-induced replication;GO:0000737, DNA catabolic process, endonucleolytic;GO:0003691, double-stranded telomeric DNA binding;GO:0004017, adenylate kinase activity;GO:0004519, endonuclease activity;GO:0004520, endodeoxyribonuclease activity;GO:0005739, mitochondrion;GO:0006284, base-excision repair;GO:0006302, double-strand break repair;GO:0006303, doub…	K10865-ko03440 Homologous recombination;ko03450 Non-homologous end-joining
TRINITY_DN142134_c0_g1	-	-
TRINITY_DN88972_c6_g1	GO:0005829, cytosol;GO:0016020, membrane;GO:0042803, protein homodimerization activity;GO:0070062, extracellular exosome	-
TRINITY_DN207375_c0_g1	GO:0001666, response to hypoxia;GO:0001892, embryonic placenta development;GO:0001938, positive regulation of endothelial cell proliferation;GO:0003700, transcription factor activity, sequence-specific DNA binding;GO:0003705, transcription factor activity, RNA polymerase II distal enhancer sequence-specific binding;GO:0003713, transcription coactivator activity;GO:0004874, aryl hydrocarbon recept…	-
TRINITY_DN115985_c0_g1	GO:0004553, hydrolase activity, hydrolyzing O-glycosyl compounds;GO:0005618, cell wall;GO:0005975, carbohydrate metabolic process;GO:0009044, xylan 1,4-beta-xylosidase activity;GO:0009505, plant-type cell wall;GO:0009506, plasmodesma;GO:0009507, chloroplast;GO:0010411, xyloglucan metabolic process;GO:0030246, carbohydrate binding;GO:0045493, xylan catabolic process;GO:0046556, alpha-L-arabinofura…	-
TRINITY_DN206373_c0_g1	GO:0000122, negative regulation of transcription from RNA polymerase II promoter;GO:0000978, RNA polymerase II core promoter proximal region sequence-specific DNA binding;GO:0000981, RNA polymerase II transcription factor activity, sequence-specific DNA binding;GO:0001078, transcriptional repressor activity, RNA polymerase II core promoter proximal region sequence-specific binding;GO:0001227, tra…	-
TRINITY_DN217445_c0_g1	GO:0003677, DNA binding;GO:0003723, RNA binding;GO:0004519, endonuclease activity;GO:0043571, maintenance of CRISPR repeat elements;GO:0046872, metal ion binding;GO:0051607, defense response to virus	-
TRINITY_DN54913_c0_g1	-	-
TRINITY_DN96424_c0_g1	-	-
TRINITY_DN151579_c0_g1	-	-
TRINITY_DN171931_c0_g1	GO:0000287, magnesium ion binding;GO:0004450, isocitrate dehydrogenase (NADP+) activity;GO:0006097, glyoxylate cycle;GO:0006099, tricarboxylic acid cycle;GO:0006102, isocitrate metabolic process;GO:0051287, NAD binding	-
TRINITY_DN88179_c2_g8	GO:0000139, Golgi membrane;GO:0005794, Golgi apparatus;GO:0009409, response to cold;GO:0016021, integral component of membrane;GO:0016413, O-acetyltransferase activity;GO:0045492, xylan biosynthetic process;GO:0045893, positive regulation of transcription, DNA-templated;GO:0050826, response to freezing;GO:1990538, xylan O-acetyltransferase activity	-
TRINITY_DN88179_c2_g9	GO:0000139, Golgi membrane;GO:0005794, Golgi apparatus;GO:0009409, response to cold;GO:0016021, integral component of membrane;GO:0016413, O-acetyltransferase activity;GO:0045492, xylan biosynthetic process;GO:0045893, positive regulation of transcription, DNA-templated;GO:0050826, response to freezing;GO:1990538, xylan O-acetyltransferase activity	-
TRINITY_DN190140_c0_g1	GO:0004365, glyceraldehyde-3-phosphate dehydrogenase (NAD+) (phosphorylating) activity;GO:0005737, cytoplasm;GO:0006006, glucose metabolic process;GO:0006096, glycolytic process;GO:0050661, NADP binding;GO:0051287, NAD binding	-
TRINITY_DN88179_c2_g4	-	-
TRINITY_DN88179_c2_g5	-	-
TRINITY_DN94423_c1_g6	GO:0003676, nucleic acid binding;GO:0008270, zinc ion binding	-
TRINITY_DN88179_c2_g7	-	-
TRINITY_DN88179_c2_g1	GO:0005794, Golgi apparatus;GO:0016021, integral component of membrane;GO:0016413, O-acetyltransferase activity;GO:0071554, cell wall organization or biogenesis	-
TRINITY_DN88179_c2_g2	-	-
TRINITY_DN25163_c0_g1	GO:0004176, ATP-dependent peptidase activity;GO:0004222, metalloendopeptidase activity;GO:0005524, ATP binding;GO:0005654, nucleoplasm;GO:0005739, mitochondrion;GO:0005743, mitochondrial inner membrane;GO:0006515, misfolded or incompletely synthesized protein catabolic process;GO:0007005, mitochondrion organization;GO:0008237, metallopeptidase activity;GO:0008283, cell proliferation;GO:0016020, m…	-
TRINITY_DN81871_c4_g4	-	-
TRINITY_DN47874_c0_g1	GO:0003882, CDP-diacylglycerol-serine O-phosphatidyltransferase activity;GO:0005741, mitochondrial outer membrane;GO:0005789, endoplasmic reticulum membrane;GO:0005829, cytosol;GO:0006646, phosphatidylethanolamine biosynthetic process;GO:0006659, phosphatidylserine biosynthetic process;GO:0010512, negative regulation of phosphatidylinositol biosynthetic process;GO:0016021, integral component of m…	-
TRINITY_DN58659_c0_g1	-	-
TRINITY_DN81871_c4_g1	GO:0003676, nucleic acid binding;GO:0015074, DNA integration	-
TRINITY_DN81871_c4_g2	-	-
TRINITY_DN81871_c4_g3	-	-
TRINITY_DN199148_c0_g1	-	-
TRINITY_DN38389_c0_g1	GO:0004373, glycogen (starch) synthase activity;GO:0005536, glucose binding;GO:0005737, cytoplasm;GO:0005978, glycogen biosynthetic process;GO:0007507, heart development;GO:0016020, membrane;GO:0016234, inclusion body;GO:0019901, protein kinase binding;GO:0061547, glycogen synthase activity, transferring glucose-1-phosphate	-
TRINITY_DN23001_c0_g1	GO:0003676, nucleic acid binding;GO:0015074, DNA integration	-
TRINITY_DN195858_c0_g1	-	-
TRINITY_DN130405_c0_g1	GO:0005886, plasma membrane;GO:0009401, phosphoenolpyruvate-dependent sugar phosphotransferase system;GO:0016021, integral component of membrane	-
TRINITY_DN155124_c0_g1	-	-
TRINITY_DN102596_c0_g1	GO:0004616, phosphogluconate dehydrogenase (decarboxylating) activity;GO:0005737, cytoplasm;GO:0006098, pentose-phosphate shunt;GO:0019521, D-gluconate metabolic process	-
TRINITY_DN93698_c0_g1	GO:0000156, phosphorelay response regulator activity;GO:0000160, phosphorelay signal transduction system;GO:0005622, intracellular;GO:0005634, nucleus;GO:0006351, transcription, DNA-templated;GO:0006355, regulation of transcription, DNA-templated;GO:0007623, circadian rhythm;GO:0009735, response to cytokinin;GO:0009736, cytokinin-activated signaling pathway	K14492-ko04075 Plant hormone signal transduction
TRINITY_DN83534_c1_g1	-	-
TRINITY_DN83534_c1_g3	-	-
TRINITY_DN83534_c1_g2	-	-
TRINITY_DN83534_c1_g4	-	-
TRINITY_DN88393_c0_g1	-	-
TRINITY_DN90072_c0_g1	GO:0016021, integral component of membrane	-
TRINITY_DN90072_c0_g3	-	-
TRINITY_DN90072_c0_g2	-	-
TRINITY_DN90072_c0_g5	-	-
TRINITY_DN90072_c0_g4	-	-
TRINITY_DN90072_c0_g7	-	-
TRINITY_DN90072_c0_g6	GO:0004674, protein serine/threonine kinase activity;GO:0005524, ATP binding;GO:0005886, plasma membrane;GO:0016021, integral component of membrane	-
TRINITY_DN23685_c0_g1	-	-
TRINITY_DN172887_c0_g1	GO:0008152, metabolic process;GO:0016747, transferase activity, transferring acyl groups other than amino-acyl groups	-
TRINITY_DN197152_c0_g1	-	-
TRINITY_DN6270_c0_g1	-	-
TRINITY_DN113375_c0_g1	-	-
TRINITY_DN25931_c0_g1	-	-
TRINITY_DN76985_c0_g2	GO:0004499, N,N-dimethylaniline monooxygenase activity;GO:0050660, flavin adenine dinucleotide binding;GO:0050661, NADP binding	-
TRINITY_DN76985_c0_g3	GO:0016491, oxidoreductase activity	-
TRINITY_DN88760_c2_g2	GO:0005789, endoplasmic reticulum membrane	-
TRINITY_DN76985_c0_g1	GO:0004499, N,N-dimethylaniline monooxygenase activity;GO:0033022, cyclopentanol catabolic process;GO:0047799, cyclopentanone monooxygenase activity;GO:0050660, flavin adenine dinucleotide binding;GO:0050661, NADP binding	-
TRINITY_DN81558_c1_g5	-	-
TRINITY_DN81558_c1_g4	-	-
TRINITY_DN81558_c1_g6	-	-
TRINITY_DN19897_c0_g1	-	-
TRINITY_DN123303_c0_g1	-	-
TRINITY_DN81558_c1_g3	-	-
TRINITY_DN81558_c1_g2	-	-
TRINITY_DN207950_c0_g1	GO:0005524, ATP binding;GO:0015412, ATPase-coupled molybdate transmembrane transporter activity;GO:0042888, molybdenum ion transmembrane transporter activity;GO:0043190, ATP-binding cassette (ABC) transporter complex	-
TRINITY_DN69242_c0_g1	-	-
TRINITY_DN97618_c3_g2	-	-
TRINITY_DN97618_c3_g1	-	-
TRINITY_DN84360_c4_g6	-	-
TRINITY_DN84360_c4_g7	-	-
TRINITY_DN84360_c4_g4	GO:0009507, chloroplast;GO:0009522, photosystem I;GO:0009535, chloroplast thylakoid membrane;GO:0015979, photosynthesis;GO:0016021, integral component of membrane	-
TRINITY_DN84360_c4_g5	-	-
TRINITY_DN84360_c4_g2	GO:0009522, photosystem I;GO:0009535, chloroplast thylakoid membrane;GO:0015979, photosynthesis;GO:0016021, integral component of membrane	K02696-ko00195 Photosynthesis
TRINITY_DN84360_c4_g3	-	-
TRINITY_DN84360_c4_g1	GO:0009507, chloroplast;GO:0009522, photosystem I;GO:0009535, chloroplast thylakoid membrane;GO:0015979, photosynthesis;GO:0016021, integral component of membrane	-
TRINITY_DN168268_c0_g1	GO:0004127, cytidylate kinase activity;GO:0005524, ATP binding;GO:0005634, nucleus;GO:0005737, cytoplasm;GO:0006207, 'de novo' pyrimidine nucleobase biosynthetic process;GO:0006221, pyrimidine nucleotide biosynthetic process;GO:0009041, uridylate kinase activity	-
TRINITY_DN210484_c0_g1	GO:0000209, protein polyubiquitination;GO:0000400, four-way junction DNA binding;GO:0000403, Y-form DNA binding;GO:0000781, chromosome, telomeric region;GO:0000790, nuclear chromatin;GO:0003677, DNA binding;GO:0004386, helicase activity;GO:0005524, ATP binding;GO:0005634, nucleus;GO:0005737, cytoplasm;GO:0006281, DNA repair;GO:0006289, nucleotide-excision repair;GO:0006302, double-strand break re…	-
TRINITY_DN211299_c0_g1	-	-
TRINITY_DN188996_c0_g1	-	-
TRINITY_DN86661_c4_g1	-	-
TRINITY_DN86661_c4_g2	-	-
TRINITY_DN86661_c4_g3	GO:0005215, transporter activity;GO:0009506, plasmodesma;GO:0016021, integral component of membrane;GO:0055085, transmembrane transport	-
TRINITY_DN86661_c4_g4	-	-
TRINITY_DN86661_c4_g5	GO:0003333, amino acid transmembrane transport;GO:0005886, plasma membrane;GO:0015171, amino acid transmembrane transporter activity;GO:0015293, symporter activity;GO:0015802, basic amino acid transport;GO:0016021, integral component of membrane;GO:0031965, nuclear membrane	-
TRINITY_DN27934_c0_g1	-	-
TRINITY_DN20300_c0_g1	-	-
TRINITY_DN115893_c0_g1	-	-
TRINITY_DN172982_c0_g1	GO:0000049, tRNA binding;GO:0000287, magnesium ion binding;GO:0001680, tRNA 3'-terminal CCA addition;GO:0004112, cyclic-nucleotide phosphodiesterase activity;GO:0005524, ATP binding;GO:0016437, tRNA cytidylyltransferase activity;GO:0016791, phosphatase activity;GO:0042245, RNA repair;GO:0052927, CTP:tRNA cytidylyltransferase activity;GO:0052928, CTP:3'-cytidine-tRNA cytidylyltransferase activity;…	-
TRINITY_DN166883_c0_g1	GO:0004559, alpha-mannosidase activity;GO:0006013, mannose metabolic process;GO:0006517, protein deglycosylation;GO:0007611, learning or memory;GO:0008270, zinc ion binding;GO:0030246, carbohydrate binding	-
TRINITY_DN124397_c0_g1	GO:0016021, integral component of membrane	-
TRINITY_DN119436_c0_g1	GO:0000388, spliceosome conformational change to release U4 (or U4atac) and U1 (or U11);GO:0000393, spliceosomal conformational changes to generate catalytic conformation;GO:0003676, nucleic acid binding;GO:0004004, ATP-dependent RNA helicase activity;GO:0005524, ATP binding;GO:0005634, nucleus;GO:0005681, spliceosomal complex;GO:0005682, U5 snRNP;GO:0005829, cytosol;GO:0046540, U4/U6 x U5 tri-sn…	-
TRINITY_DN164668_c0_g1	-	-
TRINITY_DN97537_c1_g2	-	-
TRINITY_DN97537_c1_g1	GO:0000724, double-strand break repair via homologous recombination;GO:0003677, DNA binding;GO:0005524, ATP binding;GO:0005634, nucleus;GO:0005694, chromosome;GO:0005737, cytoplasm;GO:0006260, DNA replication;GO:0006281, DNA repair;GO:0006310, DNA recombination;GO:0006974, cellular response to DNA damage stimulus;GO:0009378, four-way junction helicase activity;GO:0009506, plasmodesma;GO:0043138, …	K10901-ko03460 Fanconi anemia pathway;ko03440 Homologous recombination
TRINITY_DN78675_c0_g1	GO:0004022, alcohol dehydrogenase (NAD) activity;GO:0005737, cytoplasm;GO:0008270, zinc ion binding;GO:0016491, oxidoreductase activity	-
TRINITY_DN217160_c0_g1	GO:0004497, monooxygenase activity;GO:0005506, iron ion binding;GO:0016021, integral component of membrane;GO:0016705, oxidoreductase activity, acting on paired donors, with incorporation or reduction of molecular oxygen;GO:0018664, benzoate 4-monooxygenase activity;GO:0020037, heme binding;GO:0043231, intracellular membrane-bounded organelle;GO:0055114, oxidation-reduction process	-
TRINITY_DN64121_c0_g1	-	-
TRINITY_DN140265_c0_g1	GO:0016788, hydrolase activity, acting on ester bonds	-
TRINITY_DN140212_c0_g1	GO:0003824, catalytic activity;GO:0005886, plasma membrane;GO:0005975, carbohydrate metabolic process;GO:0005983, starch catabolic process;GO:0031216, neopullulanase activity;GO:0042597, periplasmic space;GO:0046872, metal ion binding	-
TRINITY_DN120642_c0_g1	GO:0005886, plasma membrane;GO:0008137, NADH dehydrogenase (ubiquinone) activity;GO:0016021, integral component of membrane;GO:0042773, ATP synthesis coupled electron transport;GO:0048038, quinone binding	-
TRINITY_DN215359_c0_g1	GO:0000173, inactivation of MAPK activity involved in osmosensory signaling pathway;GO:0004722, protein serine/threonine phosphatase activity;GO:0005634, nucleus;GO:0005829, cytosol;GO:0032873, negative regulation of stress-activated MAPK cascade;GO:0035970, peptidyl-threonine dephosphorylation;GO:0046872, metal ion binding;GO:1990439, MAP kinase threonine phosphatase activity	-
TRINITY_DN50776_c0_g1	-	-
TRINITY_DN86929_c6_g1	-	-
TRINITY_DN197051_c0_g1	-	-
TRINITY_DN102618_c0_g1	GO:0005576, extracellular region;GO:0006810, transport;GO:0006817, phosphate ion transport;GO:0007155, cell adhesion;GO:0009405, pathogenesis;GO:0042597, periplasmic space	-
TRINITY_DN78310_c0_g1	GO:0000975, regulatory region DNA binding;GO:0000977, RNA polymerase II regulatory region sequence-specific DNA binding;GO:0000981, RNA polymerase II transcription factor activity, sequence-specific DNA binding;GO:0001047, core promoter binding;GO:0001228, transcriptional activator activity, RNA polymerase II transcription regulatory region sequence-specific binding;GO:0001501, skeletal system de…	-
TRINITY_DN143940_c0_g1	GO:0006811, ion transport;GO:0009279, cell outer membrane;GO:0015288, porin activity;GO:0046930, pore complex	-
TRINITY_DN85417_c0_g1	GO:0003824, catalytic activity;GO:0006284, base-excision repair;GO:0051539, 4 iron, 4 sulfur cluster binding	-
TRINITY_DN85417_c0_g2	GO:0003824, catalytic activity;GO:0006284, base-excision repair;GO:0051539, 4 iron, 4 sulfur cluster binding	-
TRINITY_DN155861_c0_g1	GO:0005634, nucleus;GO:0005829, cytosol;GO:0008080, N-acetyltransferase activity;GO:0009507, chloroplast	-
TRINITY_DN95763_c0_g7	-	-
TRINITY_DN95763_c0_g6	-	-
TRINITY_DN95763_c0_g5	GO:0005509, calcium ion binding;GO:0005544, calcium-dependent phospholipid binding;GO:0005886, plasma membrane;GO:0016021, integral component of membrane;GO:0016757, transferase activity, transferring glycosyl groups	-
TRINITY_DN95763_c0_g4	-	-
TRINITY_DN95763_c0_g3	-	-
TRINITY_DN95763_c0_g2	-	-
TRINITY_DN95763_c0_g1	GO:0000932, P-body;GO:0003723, RNA binding;GO:0005634, nucleus;GO:0005737, cytoplasm;GO:0005829, cytosol;GO:0043488, regulation of mRNA stability;GO:1903679, positive regulation of cap-independent translational initiation;GO:1990247, N6-methyladenosine-containing RNA binding	-
TRINITY_DN91123_c0_g1	-	-
TRINITY_DN103766_c0_g1	GO:0005622, intracellular;GO:0007034, vacuolar transport	-
TRINITY_DN182869_c0_g1	GO:0001889, liver development;GO:0004866, endopeptidase inhibitor activity;GO:0005634, nucleus;GO:0005737, cytoplasm;GO:0005783, endoplasmic reticulum;GO:0005829, cytosol;GO:0007343, egg activation;GO:0007420, brain development;GO:0007520, myoblast fusion;GO:0007568, aging;GO:0010859, calcium-dependent cysteine-type endopeptidase inhibitor activity;GO:0016020, membrane;GO:0031100, animal organ re…	-
TRINITY_DN167502_c0_g1	-	-
TRINITY_DN95763_c0_g9	GO:0008168, methyltransferase activity;GO:0046872, metal ion binding	-
TRINITY_DN95763_c0_g8	GO:0003700, transcription factor activity, sequence-specific DNA binding;GO:0004674, protein serine/threonine kinase activity;GO:0005524, ATP binding;GO:0005634, nucleus;GO:0006351, transcription, DNA-templated;GO:0006952, defense response;GO:0007165, signal transduction;GO:0009941, chloroplast envelope;GO:0043531, ADP binding;GO:0043565, sequence-specific DNA binding	-
TRINITY_DN54590_c0_g1	GO:0003824, catalytic activity;GO:0004165, dodecenoyl-CoA delta-isomerase activity;GO:0005777, peroxisome;GO:0006635, fatty acid beta-oxidation;GO:0008152, metabolic process;GO:0009062, fatty acid catabolic process;GO:0016021, integral component of membrane	-
TRINITY_DN63779_c0_g1	GO:0000155, phosphorelay sensor kinase activity;GO:0005524, ATP binding;GO:0005622, intracellular;GO:0005886, plasma membrane;GO:0006355, regulation of transcription, DNA-templated;GO:0006817, phosphate ion transport;GO:0016021, integral component of membrane	-
TRINITY_DN82101_c0_g1	-	-
TRINITY_DN147851_c0_g1	GO:0005886, plasma membrane;GO:0008236, serine-type peptidase activity	-
TRINITY_DN134366_c0_g1	GO:0004871, signal transducer activity;GO:0006935, chemotaxis;GO:0016021, integral component of membrane	-
TRINITY_DN36376_c0_g1	-	-
TRINITY_DN112290_c0_g1	-	-
TRINITY_DN203838_c0_g1	-	-
TRINITY_DN109134_c0_g1	-	-
TRINITY_DN99534_c0_g1	GO:0004402, histone acetyltransferase activity;GO:0005829, cytosol;GO:0006281, DNA repair;GO:0008270, zinc ion binding;GO:0032777, Piccolo NuA4 histone acetyltransferase complex;GO:1900404, positive regulation of DNA repair by positive regulation of transcription from RNA polymerase II promoter;GO:2000873, regulation of histone H4 acetylation involved in response to DNA damage stimulus	-
TRINITY_DN94762_c1_g1	GO:0003677, DNA binding;GO:0003700, transcription factor activity, sequence-specific DNA binding;GO:0005634, nucleus;GO:0006351, transcription, DNA-templated;GO:0006355, regulation of transcription, DNA-templated;GO:0009585, red, far-red light phototransduction;GO:0009639, response to red or far red light;GO:0009704, de-etiolation;GO:0009740, gibberellic acid mediated signaling pathway;GO:0010017…	-
TRINITY_DN216042_c0_g1	GO:0004817, cysteine-tRNA ligase activity;GO:0005524, ATP binding;GO:0005737, cytoplasm;GO:0006423, cysteinyl-tRNA aminoacylation;GO:0008270, zinc ion binding	-
TRINITY_DN94259_c2_g4	-	-
TRINITY_DN149428_c0_g1	-	-
TRINITY_DN163340_c0_g1	GO:0000183, chromatin silencing at rDNA;GO:0000793, condensed chromosome;GO:0003677, DNA binding;GO:0004386, helicase activity;GO:0005524, ATP binding;GO:0005634, nucleus;GO:0005654, nucleoplasm;GO:0005677, chromatin silencing complex;GO:0005730, nucleolus;GO:0006302, double-strand break repair;GO:0006334, nucleosome assembly;GO:0006338, chromatin remodeling;GO:0006352, DNA-templated transcriptio…	-
TRINITY_DN72152_c0_g1	-	-
TRINITY_DN93902_c1_g3	-	-
TRINITY_DN93902_c1_g2	GO:0003700, transcription factor activity, sequence-specific DNA binding;GO:0005634, nucleus;GO:0006351, transcription, DNA-templated;GO:0006355, regulation of transcription, DNA-templated;GO:0007165, signal transduction;GO:0008270, zinc ion binding;GO:0009911, positive regulation of flower development;GO:0010228, vegetative to reproductive phase transition of meristem;GO:0016021, integral compon…	-
TRINITY_DN88379_c1_g1	GO:0005739, mitochondrion	-
TRINITY_DN100753_c0_g1	GO:0005634, nucleus;GO:0006355, regulation of transcription, DNA-templated;GO:0008270, zinc ion binding	-
TRINITY_DN93902_c1_g7	GO:0003700, transcription factor activity, sequence-specific DNA binding;GO:0005634, nucleus;GO:0006351, transcription, DNA-templated;GO:0006355, regulation of transcription, DNA-templated;GO:0007165, signal transduction;GO:0008270, zinc ion binding;GO:0009911, positive regulation of flower development;GO:0010228, vegetative to reproductive phase transition of meristem;GO:0031937, positive regula…	-
TRINITY_DN50837_c0_g1	GO:0005737, cytoplasm;GO:0005886, plasma membrane;GO:0033320, UDP-D-xylose biosynthetic process;GO:0048040, UDP-glucuronate decarboxylase activity	-
TRINITY_DN93902_c1_g5	GO:0003700, transcription factor activity, sequence-specific DNA binding;GO:0005634, nucleus;GO:0006351, transcription, DNA-templated;GO:0006355, regulation of transcription, DNA-templated;GO:0007165, signal transduction;GO:0008270, zinc ion binding;GO:0009911, positive regulation of flower development;GO:0010228, vegetative to reproductive phase transition of meristem;GO:0031937, positive regula…	-
TRINITY_DN71892_c0_g1	GO:0002098, tRNA wobble uridine modification;GO:0005576, extracellular region;GO:0005634, nucleus;GO:0005739, mitochondrion;GO:0005886, plasma membrane;GO:0006879, cellular iron ion homeostasis;GO:0016226, iron-sulfur cluster assembly;GO:0031225, anchored component of membrane;GO:0046872, metal ion binding;GO:0055114, oxidation-reduction process;GO:0070903, mitochondrial tRNA thio-modification;GO…	-
TRINITY_DN93902_c1_g9	GO:0003700, transcription factor activity, sequence-specific DNA binding;GO:0005634, nucleus;GO:0006351, transcription, DNA-templated;GO:0006355, regulation of transcription, DNA-templated;GO:0007165, signal transduction;GO:0008270, zinc ion binding;GO:0009911, positive regulation of flower development;GO:0010228, vegetative to reproductive phase transition of meristem;GO:0016021, integral compon…	-
TRINITY_DN93902_c1_g8	GO:0003700, transcription factor activity, sequence-specific DNA binding;GO:0005634, nucleus;GO:0006351, transcription, DNA-templated;GO:0006355, regulation of transcription, DNA-templated;GO:0007165, signal transduction;GO:0008270, zinc ion binding;GO:0009911, positive regulation of flower development;GO:0010228, vegetative to reproductive phase transition of meristem;GO:0031937, positive regula…	-
TRINITY_DN54366_c0_g1	GO:0003676, nucleic acid binding	-
TRINITY_DN86617_c1_g2	GO:0005622, intracellular;GO:0006886, intracellular protein transport;GO:0008033, tRNA processing;GO:0016020, membrane	-
TRINITY_DN130774_c0_g1	-	-
TRINITY_DN86115_c0_g2	GO:0003676, nucleic acid binding	-
TRINITY_DN86115_c0_g3	GO:0003676, nucleic acid binding	-
TRINITY_DN86115_c0_g1	GO:0003676, nucleic acid binding	-
TRINITY_DN77637_c0_g1	-	-
TRINITY_DN77637_c0_g2	-	-
TRINITY_DN34429_c0_g1	-	-
TRINITY_DN193375_c0_g1	-	-
TRINITY_DN120910_c0_g1	GO:0016021, integral component of membrane	-
TRINITY_DN128249_c0_g1	GO:0003677, DNA binding;GO:0004003, ATP-dependent DNA helicase activity;GO:0005524, ATP binding	-
TRINITY_DN97553_c1_g1	-	-
TRINITY_DN178174_c0_g1	-	-
TRINITY_DN97553_c1_g3	GO:0009507, chloroplast;GO:0009536, plastid;GO:0009941, chloroplast envelope;GO:0016021, integral component of membrane;GO:0031969, chloroplast membrane	-
TRINITY_DN97553_c1_g2	GO:0006629, lipid metabolic process;GO:0016021, integral component of membrane;GO:0016787, hydrolase activity	-
TRINITY_DN57928_c0_g1	GO:0004497, monooxygenase activity;GO:0005506, iron ion binding;GO:0005789, endoplasmic reticulum membrane;GO:0008168, methyltransferase activity;GO:0008398, sterol 14-demethylase activity;GO:0016021, integral component of membrane;GO:0016126, sterol biosynthetic process;GO:0016705, oxidoreductase activity, acting on paired donors, with incorporation or reduction of molecular oxygen;GO:0020037, h…	-
TRINITY_DN205838_c0_g1	-	-
TRINITY_DN85774_c1_g1	-	-
TRINITY_DN118235_c0_g1	-	-
TRINITY_DN136233_c0_g1	-	-
TRINITY_DN104756_c0_g1	-	-
TRINITY_DN18419_c0_g1	GO:0003677, DNA binding;GO:0003700, transcription factor activity, sequence-specific DNA binding;GO:0006351, transcription, DNA-templated	-
TRINITY_DN69523_c0_g1	GO:0000139, Golgi membrane;GO:0001726, ruffle;GO:0002102, podosome;GO:0002250, adaptive immune response;GO:0003779, actin binding;GO:0005622, intracellular;GO:0005737, cytoplasm;GO:0005769, early endosome;GO:0005829, cytosol;GO:0005886, plasma membrane;GO:0005938, cell cortex;GO:0006898, receptor-mediated endocytosis;GO:0007416, synapse assembly;GO:0014069, postsynaptic density;GO:0016601, Rac pr…	-
TRINITY_DN34996_c0_g1	GO:0005634, nucleus;GO:0005635, nuclear envelope;GO:0005737, cytoplasm;GO:0005829, cytosol;GO:0008541, proteasome regulatory particle, lid subcomplex;GO:0031595, nuclear proteasome complex;GO:0034399, nuclear periphery;GO:0043161, proteasome-mediated ubiquitin-dependent protein catabolic process;GO:0045842, positive regulation of mitotic metaphase/anaphase transition	-
TRINITY_DN42269_c0_g1	-	-
TRINITY_DN90956_c3_g5	-	-
TRINITY_DN90956_c3_g4	-	-
TRINITY_DN90956_c3_g3	-	-
TRINITY_DN90956_c3_g2	-	-
TRINITY_DN90956_c3_g1	-	-
TRINITY_DN78029_c1_g1	GO:0006620, posttranslational protein targeting to endoplasmic reticulum membrane;GO:0009408, response to heat;GO:0072380, TRC complex	-
TRINITY_DN204486_c0_g1	GO:0003676, nucleic acid binding;GO:0003677, DNA binding;GO:0003887, DNA-directed DNA polymerase activity;GO:0003964, RNA-directed DNA polymerase activity;GO:0004523, RNA-DNA hybrid ribonuclease activity;GO:0008270, zinc ion binding;GO:0015074, DNA integration;GO:0016032, viral process;GO:0046718, viral entry into host cell;GO:0075713, establishment of integrated proviral latency	-
TRINITY_DN94587_c1_g3	-	-
TRINITY_DN96854_c2_g1	-	-
TRINITY_DN160136_c0_g1	-	-
TRINITY_DN51634_c0_g1	-	-
TRINITY_DN83896_c4_g2	-	-
TRINITY_DN83896_c4_g1	-	-
TRINITY_DN147521_c0_g1	-	-
TRINITY_DN126688_c0_g1	GO:0008152, metabolic process;GO:0016787, hydrolase activity	-
TRINITY_DN158867_c0_g1	-	-
TRINITY_DN94640_c1_g2	GO:0003865, 3-oxo-5-alpha-steroid 4-dehydrogenase activity;GO:0005737, cytoplasm;GO:0016021, integral component of membrane;GO:0016132, brassinosteroid biosynthetic process;GO:0047751, cholestenone 5-alpha-reductase activity;GO:0050213, progesterone 5-alpha-reductase activity;GO:0055114, oxidation-reduction process;GO:0090377, seed trichome initiation;GO:0090378, seed trichome elongation	-
TRINITY_DN112248_c0_g1	GO:0005507, copper ion binding;GO:0005737, cytoplasm;GO:0005829, cytosol;GO:0006878, cellular copper ion homeostasis;GO:0008131, primary amine oxidase activity;GO:0009308, amine metabolic process;GO:0009310, amine catabolic process;GO:0042764, ascospore-type prospore;GO:0048038, quinone binding;GO:0052593, tryptamine:oxygen oxidoreductase (deaminating) activity;GO:0052594, aminoacetone:oxygen oxi…	-
TRINITY_DN195047_c0_g1	GO:0004616, phosphogluconate dehydrogenase (decarboxylating) activity;GO:0051287, NAD binding	-
TRINITY_DN107058_c0_g1	GO:0005524, ATP binding;GO:0005525, GTP binding;GO:0005634, nucleus;GO:0005737, cytoplasm;GO:0005829, cytosol;GO:0016887, ATPase activity;GO:0043022, ribosome binding;GO:0043023, ribosomal large subunit binding;GO:0046872, metal ion binding	-
TRINITY_DN92120_c0_g3	GO:0000166, nucleotide binding;GO:0003723, RNA binding;GO:0005634, nucleus;GO:0005730, nucleolus;GO:0005737, cytoplasm;GO:0005886, plasma membrane;GO:0006351, transcription, DNA-templated;GO:0006355, regulation of transcription, DNA-templated;GO:0008270, zinc ion binding;GO:0042802, identical protein binding	K14651-ko03022 Basal transcription factors
TRINITY_DN66012_c0_g1	GO:0000002, mitochondrial genome maintenance;GO:0004149, dihydrolipoyllysine-residue succinyltransferase activity;GO:0006099, tricarboxylic acid cycle;GO:0006103, 2-oxoglutarate metabolic process;GO:0009353, mitochondrial oxoglutarate dehydrogenase complex;GO:0033512, L-lysine catabolic process to acetyl-CoA via saccharopine;GO:0042645, mitochondrial nucleoid;GO:0045252, oxoglutarate dehydrogenas…	-
TRINITY_DN128423_c0_g1	GO:0004322, ferroxidase activity;GO:0005507, copper ion binding;GO:0005886, plasma membrane;GO:0006827, high-affinity iron ion transmembrane transport;GO:0016021, integral component of membrane;GO:0016491, oxidoreductase activity;GO:0033215, iron assimilation by reduction and transport;GO:0033573, high-affinity iron permease complex;GO:0046688, response to copper ion;GO:1901684, arsenate ion tran…	-
TRINITY_DN94056_c2_g5	-	-
TRINITY_DN94056_c2_g4	-	-
TRINITY_DN94056_c2_g7	-	-
TRINITY_DN76952_c0_g1	GO:0000166, nucleotide binding;GO:0001069, regulatory region RNA binding;GO:0002244, hematopoietic progenitor cell differentiation;GO:0005634, nucleus;GO:0005654, nucleoplasm;GO:0006397, mRNA processing;GO:0008380, RNA splicing;GO:0016607, nuclear speck;GO:0048025, negative regulation of mRNA splicing, via spliceosome	-
TRINITY_DN94056_c2_g1	GO:0005886, plasma membrane;GO:0006810, transport;GO:0016021, integral component of membrane;GO:0022857, transmembrane transporter activity	-
TRINITY_DN121697_c0_g1	GO:0016021, integral component of membrane	-
TRINITY_DN94056_c2_g3	-	-
TRINITY_DN94056_c2_g2	GO:0005886, plasma membrane;GO:0006810, transport;GO:0016021, integral component of membrane;GO:0022857, transmembrane transporter activity	-
TRINITY_DN145791_c0_g1	GO:0003885, D-arabinono-1,4-lactone oxidase activity;GO:0005739, mitochondrion;GO:0016020, membrane;GO:0031966, mitochondrial membrane;GO:0050660, flavin adenine dinucleotide binding	-
TRINITY_DN4144_c0_g1	-	-
TRINITY_DN41095_c0_g1	GO:0003677, DNA binding;GO:0004518, nuclease activity	-
TRINITY_DN94056_c2_g9	GO:0005886, plasma membrane;GO:0006810, transport;GO:0016021, integral component of membrane;GO:0022857, transmembrane transporter activity	-
TRINITY_DN94056_c2_g8	GO:0005886, plasma membrane;GO:0006810, transport;GO:0016021, integral component of membrane;GO:0022857, transmembrane transporter activity	-
TRINITY_DN39989_c0_g1	GO:0006725, cellular aromatic compound metabolic process;GO:0008198, ferrous iron binding;GO:0008270, zinc ion binding;GO:0016701, oxidoreductase activity, acting on single donors with incorporation of molecular oxygen	-
TRINITY_DN67996_c0_g1	-	-
TRINITY_DN83085_c1_g4	-	-
TRINITY_DN48313_c0_g1	GO:0005739, mitochondrion;GO:0016491, oxidoreductase activity;GO:0071949, FAD binding	-
TRINITY_DN83085_c1_g6	-	-
TRINITY_DN83085_c1_g7	-	-
TRINITY_DN92870_c0_g1	GO:0001731, formation of translation preinitiation complex;GO:0002183, cytoplasmic translational initiation;GO:0003743, translation initiation factor activity;GO:0005852, eukaryotic translation initiation factor 3 complex;GO:0006446, regulation of translational initiation;GO:0016282, eukaryotic 43S preinitiation complex;GO:0033290, eukaryotic 48S preinitiation complex	-
TRINITY_DN83085_c1_g1	GO:0016021, integral component of membrane	-
TRINITY_DN83085_c1_g2	-	-
TRINITY_DN83085_c1_g3	-	-
TRINITY_DN192173_c0_g1	GO:0008168, methyltransferase activity	-
TRINITY_DN130850_c0_g1	-	-
TRINITY_DN83085_c1_g8	-	-
TRINITY_DN83085_c1_g9	-	-
TRINITY_DN88500_c3_g10	GO:0005743, mitochondrial inner membrane;GO:0005747, mitochondrial respiratory chain complex I;GO:0006120, mitochondrial electron transport, NADH to ubiquinone;GO:0008137, NADH dehydrogenase (ubiquinone) activity;GO:0014070, response to organic cyclic compound;GO:0016021, integral component of membrane;GO:0030425, dendrite;GO:0031966, mitochondrial membrane;GO:0032981, mitochondrial respiratory c…	K03878-ko00190 Oxidative phosphorylation
TRINITY_DN71861_c0_g1	GO:0004727, prenylated protein tyrosine phosphatase activity;GO:0005634, nucleus;GO:0005737, cytoplasm;GO:0005769, early endosome;GO:0005886, plasma membrane;GO:0007219, Notch signaling pathway;GO:0008138, protein tyrosine/serine/threonine phosphatase activity;GO:0043117, positive regulation of vascular permeability;GO:0043542, endothelial cell migration;GO:1900746, regulation of vascular endothe…	-
TRINITY_DN90466_c2_g1	GO:0004672, protein kinase activity;GO:0004674, protein serine/threonine kinase activity;GO:0005524, ATP binding;GO:0016021, integral component of membrane	-
TRINITY_DN198830_c0_g1	GO:0000184, nuclear-transcribed mRNA catabolic process, nonsense-mediated decay;GO:0000243, commitment complex;GO:0000339, RNA cap binding;GO:0003729, mRNA binding;GO:0005829, cytosol;GO:0005844, polysome;GO:0005846, nuclear cap binding complex;GO:0006970, response to osmotic stress;GO:0045292, mRNA cis splicing, via spliceosome;GO:0051028, mRNA transport;GO:0072686, mitotic spindle	-
TRINITY_DN218283_c0_g1	-	-
TRINITY_DN97118_c8_g1	-	-
TRINITY_DN136531_c0_g1	GO:0005622, intracellular	-
TRINITY_DN88827_c1_g12	GO:0003676, nucleic acid binding;GO:0004523, RNA-DNA hybrid ribonuclease activity;GO:0046872, metal ion binding	-
TRINITY_DN110039_c0_g1	GO:0000272, polysaccharide catabolic process;GO:0004099, chitin deacetylase activity;GO:0005975, carbohydrate metabolic process;GO:0006032, chitin catabolic process;GO:0008061, chitin binding;GO:0016810, hydrolase activity, acting on carbon-nitrogen (but not peptide) bonds;GO:0046872, metal ion binding	-
TRINITY_DN29791_c0_g1	-	-
TRINITY_DN32891_c0_g1	-	-
TRINITY_DN95171_c0_g1	GO:0000184, nuclear-transcribed mRNA catabolic process, nonsense-mediated decay;GO:0000932, P-body;GO:0005634, nucleus;GO:0006952, defense response;GO:0007126, meiotic nuclear division;GO:0007275, multicellular organism development;GO:0040008, regulation of growth;GO:0090306, spindle assembly involved in meiosis	K14409-ko03015 mRNA surveillance pathway
TRINITY_DN95171_c0_g2	GO:0003723, RNA binding;GO:0003735, structural constituent of ribosome;GO:0006412, translation;GO:0016021, integral component of membrane;GO:0022625, cytosolic large ribosomal subunit;GO:0042254, ribosome biogenesis	-
TRINITY_DN95171_c0_g3	-	-
TRINITY_DN95171_c0_g4	GO:0000184, nuclear-transcribed mRNA catabolic process, nonsense-mediated decay;GO:0000932, P-body;GO:0005634, nucleus;GO:0090306, spindle assembly involved in meiosis	-
TRINITY_DN95171_c0_g5	-	-
TRINITY_DN83898_c1_g1	-	-
TRINITY_DN109857_c0_g1	-	-
TRINITY_DN93925_c1_g1	-	-
TRINITY_DN127445_c0_g1	GO:0003824, catalytic activity;GO:0008152, metabolic process;GO:0016021, integral component of membrane;GO:0031177, phosphopantetheine binding	-
TRINITY_DN212408_c0_g1	GO:0008152, metabolic process;GO:0016021, integral component of membrane;GO:0016746, transferase activity, transferring acyl groups	-
TRINITY_DN141040_c0_g1	-	-
TRINITY_DN95328_c0_g1	-	-
TRINITY_DN197582_c0_g1	GO:0016746, transferase activity, transferring acyl groups	-
TRINITY_DN33602_c0_g1	-	-
TRINITY_DN161585_c0_g1	GO:0004497, monooxygenase activity;GO:0071949, FAD binding	-
TRINITY_DN178397_c0_g1	-	-
TRINITY_DN202379_c0_g1	-	-
TRINITY_DN113845_c0_g1	GO:0003713, transcription coactivator activity;GO:0005634, nucleus;GO:0005654, nucleoplasm;GO:0005737, cytoplasm;GO:0006110, regulation of glycolytic process;GO:0006366, transcription from RNA polymerase II promoter;GO:0006397, mRNA processing;GO:0008283, cell proliferation;GO:0008380, RNA splicing;GO:0035035, histone acetyltransferase binding;GO:0045944, positive regulation of transcription from…	-
TRINITY_DN130356_c0_g1	-	-
TRINITY_DN170644_c0_g1	GO:0016021, integral component of membrane	-
TRINITY_DN182662_c0_g1	-	-
TRINITY_DN87987_c2_g1	GO:0003735, structural constituent of ribosome;GO:0005739, mitochondrion;GO:0005762, mitochondrial large ribosomal subunit;GO:0032543, mitochondrial translation	-
TRINITY_DN93202_c0_g2	-	-
TRINITY_DN175745_c0_g1	-	-
TRINITY_DN10128_c0_g1	GO:0004674, protein serine/threonine kinase activity;GO:0005524, ATP binding	-
TRINITY_DN214853_c0_g1	-	-
TRINITY_DN123740_c0_g1	-	-
TRINITY_DN74127_c0_g1	GO:0016021, integral component of membrane;GO:0042802, identical protein binding	-
TRINITY_DN171492_c0_g1	-	-
TRINITY_DN195934_c0_g1	GO:0008270, zinc ion binding;GO:0016491, oxidoreductase activity;GO:0019569, L-arabinose catabolic process to xylulose 5-phosphate;GO:0042732, D-xylose metabolic process;GO:0046526, D-xylulose reductase activity	-
TRINITY_DN31040_c0_g1	-	-
TRINITY_DN183621_c0_g1	-	-
TRINITY_DN175417_c0_g1	-	-
TRINITY_DN176823_c0_g1	-	-
TRINITY_DN162721_c0_g1	GO:0004114, 3',5'-cyclic-nucleotide phosphodiesterase activity;GO:0007165, signal transduction;GO:0046872, metal ion binding	-
TRINITY_DN155788_c0_g1	-	-
TRINITY_DN92489_c2_g1	-	-
TRINITY_DN59196_c0_g1	-	-
TRINITY_DN33782_c0_g1	GO:0004176, ATP-dependent peptidase activity;GO:0004252, serine-type endopeptidase activity;GO:0005524, ATP binding;GO:0005782, peroxisomal matrix;GO:0006515, misfolded or incompletely synthesized protein catabolic process;GO:0006625, protein targeting to peroxisome;GO:0016485, protein processing;GO:0016558, protein import into peroxisome matrix	-
TRINITY_DN159974_c0_g1	-	-
TRINITY_DN191191_c0_g1	-	-
TRINITY_DN18922_c0_g1	-	-
TRINITY_DN153241_c0_g1	-	-
TRINITY_DN172851_c0_g1	-	-
TRINITY_DN183516_c0_g1	GO:0000166, nucleotide binding;GO:0005654, nucleoplasm;GO:0006351, transcription, DNA-templated;GO:0006355, regulation of transcription, DNA-templated;GO:0006915, apoptotic process	-
TRINITY_DN169304_c0_g1	-	-
TRINITY_DN96578_c0_g1	-	-
TRINITY_DN59877_c0_g1	GO:0003924, GTPase activity;GO:0005525, GTP binding;GO:0005743, mitochondrial inner membrane;GO:0005759, mitochondrial matrix;GO:0005761, mitochondrial ribosome;GO:0006412, translation;GO:0043022, ribosome binding;GO:0045727, positive regulation of translation	-
TRINITY_DN116329_c0_g1	-	-
TRINITY_DN78038_c0_g1	GO:0004766, spermidine synthase activity;GO:0005829, cytosol;GO:0006595, polyamine metabolic process;GO:0008295, spermidine biosynthetic process;GO:0042803, protein homodimerization activity	-
TRINITY_DN78038_c0_g3	GO:0004766, spermidine synthase activity;GO:0005829, cytosol;GO:0006595, polyamine metabolic process;GO:0006596, polyamine biosynthetic process;GO:0008295, spermidine biosynthetic process;GO:0016740, transferase activity;GO:0016765, transferase activity, transferring alkyl or aryl (other than methyl) groups	-
TRINITY_DN78038_c0_g2	GO:0004766, spermidine synthase activity;GO:0005829, cytosol;GO:0006595, polyamine metabolic process;GO:0006596, polyamine biosynthetic process;GO:0008295, spermidine biosynthetic process;GO:0016740, transferase activity;GO:0016765, transferase activity, transferring alkyl or aryl (other than methyl) groups	-
TRINITY_DN94301_c1_g1	-	-
TRINITY_DN169643_c0_g1	-	-
TRINITY_DN103501_c0_g1	-	-
TRINITY_DN80851_c0_g1	-	-
TRINITY_DN86084_c1_g11	GO:0004497, monooxygenase activity;GO:0009507, chloroplast;GO:0009853, photorespiration;GO:0016984, ribulose-bisphosphate carboxylase activity;GO:0019253, reductive pentose-phosphate cycle	-
TRINITY_DN219598_c0_g1	-	-
TRINITY_DN33040_c0_g1	-	-
TRINITY_DN88022_c2_g3	-	-
TRINITY_DN93783_c1_g2	-	-
TRINITY_DN145220_c0_g1	-	-
TRINITY_DN208963_c0_g1	GO:0004174, electron-transferring-flavoprotein dehydrogenase activity;GO:0016491, oxidoreductase activity;GO:0046872, metal ion binding;GO:0051536, iron-sulfur cluster binding;GO:0051539, 4 iron, 4 sulfur cluster binding	-
TRINITY_DN169573_c0_g1	GO:0010181, FMN binding;GO:0016491, oxidoreductase activity	-
TRINITY_DN90981_c1_g1	GO:0005773, vacuole;GO:0005774, vacuolar membrane;GO:0015991, ATP hydrolysis coupled proton transport;GO:0033178, proton-transporting two-sector ATPase complex, catalytic domain;GO:0046961, proton-transporting ATPase activity, rotational mechanism	K02150-ko00190 Oxidative phosphorylation;ko04150 mTOR signaling pathway;ko04145 Phagosome
TRINITY_DN63973_c0_g1	GO:0003676, nucleic acid binding;GO:0004190, aspartic-type endopeptidase activity;GO:0015074, DNA integration	-
TRINITY_DN21462_c0_g1	-	-
TRINITY_DN178568_c0_g1	GO:0000790, nuclear chromatin;GO:0005634, nucleus;GO:0006338, chromatin remodeling;GO:0006357, regulation of transcription from RNA polymerase II promoter;GO:0006368, transcription elongation from RNA polymerase II promoter;GO:0016586, RSC complex	-
TRINITY_DN95561_c1_g1	-	-
TRINITY_DN106943_c0_g1	GO:0000122, negative regulation of transcription from RNA polymerase II promoter;GO:0003700, transcription factor activity, sequence-specific DNA binding;GO:0005654, nucleoplasm;GO:0005737, cytoplasm;GO:0006366, transcription from RNA polymerase II promoter;GO:0008270, zinc ion binding;GO:0045111, intermediate filament cytoskeleton;GO:1900181, negative regulation of protein localization to nucleus	-
TRINITY_DN19289_c0_g1	-	-
TRINITY_DN87927_c4_g6	-	-
TRINITY_DN86670_c1_g4	GO:0005634, nucleus;GO:0005829, cytosol;GO:0009691, cytokinin biosynthetic process;GO:0016799, hydrolase activity, hydrolyzing N-glycosyl compounds	-
TRINITY_DN87927_c4_g4	-	-
TRINITY_DN36545_c0_g1	GO:0005886, plasma membrane;GO:0015542, sugar efflux transmembrane transporter activity;GO:0016021, integral component of membrane	-
TRINITY_DN28949_c0_g1	GO:0000775, chromosome, centromeric region;GO:0000781, chromosome, telomeric region;GO:0005737, cytoplasm;GO:0005856, cytoskeleton;GO:0006348, chromatin silencing at telomere;GO:0006897, endocytosis;GO:0006974, cellular response to DNA damage stimulus;GO:0009405, pathogenesis;GO:0030702, chromatin silencing at centromere;GO:0071963, establishment or maintenance of cell polarity regulating cell sh…	-
TRINITY_DN87927_c4_g3	GO:0000139, Golgi membrane;GO:0005794, Golgi apparatus;GO:0008375, acetylglucosaminyltransferase activity;GO:0015020, glucuronosyltransferase activity;GO:0016021, integral component of membrane;GO:0016049, cell growth	-
TRINITY_DN86670_c1_g3	GO:0005634, nucleus;GO:0005829, cytosol;GO:0009691, cytokinin biosynthetic process;GO:0016799, hydrolase activity, hydrolyzing N-glycosyl compounds;GO:0016829, lyase activity	-
TRINITY_DN86670_c1_g2	-	-
TRINITY_DN65643_c0_g1	-	-
TRINITY_DN120975_c0_g1	-	-
TRINITY_DN87927_c4_g8	-	-
TRINITY_DN10343_c0_g1	-	-
TRINITY_DN220270_c0_g1	-	-
TRINITY_DN83646_c0_g2	GO:0005886, plasma membrane;GO:0006855, drug transmembrane transport;GO:0010044, response to aluminum ion;GO:0015137, citrate transmembrane transporter activity;GO:0015238, drug transmembrane transporter activity;GO:0015297, antiporter activity;GO:0015746, citrate transport;GO:0016021, integral component of membrane	-
TRINITY_DN108209_c0_g1	GO:0003677, DNA binding;GO:0003700, transcription factor activity, sequence-specific DNA binding;GO:0006351, transcription, DNA-templated	-
TRINITY_DN83646_c0_g1	-	-
TRINITY_DN142603_c0_g1	GO:0005628, prospore membrane;GO:0005794, Golgi apparatus;GO:0006623, protein targeting to vacuole;GO:0019898, extrinsic component of membrane;GO:0032120, ascospore-type prospore membrane assembly;GO:0045053, protein retention in Golgi apparatus;GO:0045324, late endosome to vacuole transport	-
TRINITY_DN63863_c0_g1	GO:0004842, ubiquitin-protein transferase activity;GO:0005634, nucleus;GO:0005737, cytoplasm;GO:0016567, protein ubiquitination;GO:0016874, ligase activity;GO:0042787, protein ubiquitination involved in ubiquitin-dependent protein catabolic process;GO:0043328, protein targeting to vacuole involved in ubiquitin-dependent protein catabolic process via the multivesicular body sorting pathway	-
TRINITY_DN139986_c0_g1	GO:0004829, threonine-tRNA ligase activity;GO:0005524, ATP binding;GO:0005737, cytoplasm;GO:0006435, threonyl-tRNA aminoacylation;GO:0046872, metal ion binding	-
TRINITY_DN178638_c0_g1	-	-
TRINITY_DN83938_c8_g1	GO:0000166, nucleotide binding;GO:0000184, nuclear-transcribed mRNA catabolic process, nonsense-mediated decay;GO:0003723, RNA binding;GO:0003743, translation initiation factor activity;GO:0005634, nucleus;GO:0005737, cytoplasm;GO:0005829, cytosol;GO:0006413, translational initiation;GO:0006446, regulation of translational initiation;GO:0009651, response to salt stress;GO:0016032, viral process;G…	-
TRINITY_DN122519_c0_g1	-	-
TRINITY_DN203098_c0_g1	GO:0005975, carbohydrate metabolic process;GO:0016853, isomerase activity;GO:0030246, carbohydrate binding	-
TRINITY_DN96505_c2_g5	-	-
TRINITY_DN131270_c0_g1	-	-
TRINITY_DN191043_c0_g1	-	-
TRINITY_DN111044_c0_g1	-	-
TRINITY_DN129816_c0_g1	-	-
TRINITY_DN75046_c0_g1	GO:0003723, RNA binding;GO:0003743, translation initiation factor activity;GO:0005737, cytoplasm;GO:0006446, regulation of translational initiation;GO:0008135, translation factor activity, RNA binding;GO:0016020, membrane;GO:0016281, eukaryotic translation initiation factor 4F complex	K03260-ko03013 RNA transport
TRINITY_DN129043_c0_g1	-	-
TRINITY_DN161551_c0_g1	-	-
TRINITY_DN91974_c1_g2	GO:0003994, aconitate hydratase activity;GO:0005507, copper ion binding;GO:0005737, cytoplasm;GO:0005739, mitochondrion;GO:0005773, vacuole;GO:0005829, cytosol;GO:0005886, plasma membrane;GO:0006097, glyoxylate cycle;GO:0006101, citrate metabolic process;GO:0006102, isocitrate metabolic process;GO:0009506, plasmodesma;GO:0046872, metal ion binding;GO:0048027, mRNA 5'-UTR binding;GO:0048046, apopl…	K01681-ko00630 Glyoxylate and dicarboxylate metabolism;ko01200 Carbon metabolism;ko00020 Citrate cycle (TCA cycle);ko01230 Biosynthesis of amino acids;ko01210 2-Oxocarboxylic acid metabolism;ko00720 Carbon fixation pathways in prokaryotes
TRINITY_DN91974_c1_g3	GO:0003857, 3-hydroxyacyl-CoA dehydrogenase activity;GO:0004165, dodecenoyl-CoA delta-isomerase activity;GO:0004300, enoyl-CoA hydratase activity;GO:0005618, cell wall;GO:0005730, nucleolus;GO:0005777, peroxisome;GO:0006635, fatty acid beta-oxidation;GO:0008692, 3-hydroxybutyryl-CoA epimerase activity;GO:0009506, plasmodesma;GO:0009514, glyoxysome;GO:0016508, long-chain-enoyl-CoA hydratase activi…	-
TRINITY_DN206362_c0_g1	-	-
TRINITY_DN91974_c1_g1	-	-
TRINITY_DN91974_c1_g6	-	-
TRINITY_DN91974_c1_g7	-	-
TRINITY_DN91974_c1_g4	-	-
TRINITY_DN91974_c1_g5	-	-
TRINITY_DN84688_c2_g3	-	-
TRINITY_DN84688_c2_g2	-	-
TRINITY_DN84688_c2_g1	GO:0002183, cytoplasmic translational initiation;GO:0003743, translation initiation factor activity;GO:0005737, cytoplasm;GO:0005840, ribosome;GO:0022626, cytosolic ribosome	-
TRINITY_DN83748_c1_g1	-	-
TRINITY_DN192477_c0_g1	-	-
TRINITY_DN97614_c1_g3	GO:0003676, nucleic acid binding;GO:0005739, mitochondrion;GO:0015074, DNA integration	-
TRINITY_DN120228_c0_g1	-	-
TRINITY_DN116137_c0_g1	-	-
TRINITY_DN81798_c3_g2	-	-
TRINITY_DN81014_c1_g1	GO:0004427, inorganic diphosphatase activity;GO:0005774, vacuolar membrane;GO:0009678, hydrogen-translocating pyrophosphatase activity;GO:0015992, proton transport;GO:0016021, integral component of membrane;GO:0046872, metal ion binding	-
TRINITY_DN81014_c1_g2	GO:0004427, inorganic diphosphatase activity;GO:0005774, vacuolar membrane;GO:0009678, hydrogen-translocating pyrophosphatase activity;GO:0015992, proton transport;GO:0016021, integral component of membrane;GO:0046872, metal ion binding	-
TRINITY_DN219437_c0_g1	-	-
TRINITY_DN106473_c0_g1	-	-
TRINITY_DN107272_c0_g1	-	-
TRINITY_DN97614_c1_g4	GO:0003676, nucleic acid binding;GO:0005739, mitochondrion;GO:0008270, zinc ion binding;GO:0015074, DNA integration;GO:0055114, oxidation-reduction process	-
TRINITY_DN87637_c0_g1	-	-
TRINITY_DN125648_c0_g1	GO:0004553, hydrolase activity, hydrolyzing O-glycosyl compounds;GO:0004558, alpha-1,4-glucosidase activity;GO:0005975, carbohydrate metabolic process;GO:0030246, carbohydrate binding;GO:0032450, maltose alpha-glucosidase activity;GO:0044264, cellular polysaccharide metabolic process;GO:0046527, glucosyltransferase activity	-
TRINITY_DN136879_c0_g1	-	-
TRINITY_DN88470_c1_g1	-	-
TRINITY_DN93073_c2_g5	GO:0044599, AP-5 adaptor complex	-
TRINITY_DN93073_c2_g4	GO:0005886, plasma membrane;GO:0016021, integral component of membrane;GO:0042128, nitrate assimilation;GO:0055085, transmembrane transport	-
TRINITY_DN93073_c2_g3	GO:0044599, AP-5 adaptor complex	-
TRINITY_DN93073_c2_g2	GO:0004672, protein kinase activity;GO:0004674, protein serine/threonine kinase activity;GO:0005524, ATP binding;GO:0005886, plasma membrane	-
TRINITY_DN93073_c2_g1	GO:0004672, protein kinase activity;GO:0004674, protein serine/threonine kinase activity;GO:0005524, ATP binding;GO:0005886, plasma membrane;GO:0016021, integral component of membrane	-
TRINITY_DN161865_c0_g1	-	-
TRINITY_DN198034_c0_g1	-	-
TRINITY_DN93995_c0_g1	GO:0004497, monooxygenase activity;GO:0005506, iron ion binding;GO:0009718, anthocyanin-containing compound biosynthetic process;GO:0016705, oxidoreductase activity, acting on paired donors, with incorporation or reduction of molecular oxygen;GO:0020037, heme binding;GO:0033772, flavonoid 3',5'-hydroxylase activity	-
TRINITY_DN74004_c1_g1	GO:0003723, RNA binding	-
TRINITY_DN93995_c0_g3	GO:0004497, monooxygenase activity;GO:0005506, iron ion binding;GO:0016020, membrane;GO:0016021, integral component of membrane;GO:0016102, diterpenoid biosynthetic process;GO:0016705, oxidoreductase activity, acting on paired donors, with incorporation or reduction of molecular oxygen;GO:0016709, oxidoreductase activity, acting on paired donors, with incorporation or reduction of molecular oxyge…	-
TRINITY_DN93995_c0_g4	GO:0004497, monooxygenase activity;GO:0005506, iron ion binding;GO:0016020, membrane;GO:0016021, integral component of membrane;GO:0016705, oxidoreductase activity, acting on paired donors, with incorporation or reduction of molecular oxygen;GO:0016709, oxidoreductase activity, acting on paired donors, with incorporation or reduction of molecular oxygen, NAD(P)H as one donor, and incorporation of…	-
TRINITY_DN93995_c0_g5	GO:0004497, monooxygenase activity;GO:0005506, iron ion binding;GO:0016021, integral component of membrane;GO:0016705, oxidoreductase activity, acting on paired donors, with incorporation or reduction of molecular oxygen;GO:0020037, heme binding;GO:0033772, flavonoid 3',5'-hydroxylase activity	-
TRINITY_DN93995_c0_g6	GO:0004497, monooxygenase activity;GO:0005506, iron ion binding;GO:0009718, anthocyanin-containing compound biosynthetic process;GO:0016705, oxidoreductase activity, acting on paired donors, with incorporation or reduction of molecular oxygen;GO:0020037, heme binding;GO:0033772, flavonoid 3',5'-hydroxylase activity	-
TRINITY_DN93995_c0_g7	GO:0004497, monooxygenase activity;GO:0005506, iron ion binding;GO:0005789, endoplasmic reticulum membrane;GO:0009684, indoleacetic acid biosynthetic process;GO:0016020, membrane;GO:0016021, integral component of membrane;GO:0016705, oxidoreductase activity, acting on paired donors, with incorporation or reduction of molecular oxygen;GO:0020037, heme binding;GO:0098542, defense response to other …	-
TRINITY_DN205848_c0_g1	GO:0005886, plasma membrane;GO:0006810, transport;GO:0016021, integral component of membrane	-
TRINITY_DN131020_c0_g1	GO:0003723, RNA binding;GO:0004386, helicase activity;GO:0004525, ribonuclease III activity;GO:0005524, ATP binding;GO:0006396, RNA processing;GO:0046872, metal ion binding;GO:0050688, regulation of defense response to virus;GO:0051607, defense response to virus	-
TRINITY_DN108359_c0_g1	GO:0000209, protein polyubiquitination;GO:0001701, in utero embryonic development;GO:0003676, nucleic acid binding;GO:0004842, ubiquitin-protein transferase activity;GO:0005634, nucleus;GO:0005654, nucleoplasm;GO:0005694, chromosome;GO:0005730, nucleolus;GO:0005815, microtubule organizing center;GO:0005829, cytosol;GO:0006260, DNA replication;GO:0006275, regulation of DNA replication;GO:0006974, …	-
TRINITY_DN162202_c0_g1	-	-
TRINITY_DN147978_c0_g1	GO:0006396, RNA processing	-
TRINITY_DN172336_c0_g1	-	-
TRINITY_DN85184_c1_g4	-	-
TRINITY_DN85184_c1_g2	GO:0005783, endoplasmic reticulum;GO:0008270, zinc ion binding;GO:0016021, integral component of membrane;GO:0016491, oxidoreductase activity;GO:0046183, L-idonate catabolic process	K04710-ko00600 Sphingolipid metabolism;ko04071 Sphingolipid signaling pathway
TRINITY_DN85184_c1_g3	-	-
TRINITY_DN160936_c0_g1	GO:0005886, plasma membrane;GO:0008324, cation transmembrane transporter activity;GO:0016021, integral component of membrane	-
TRINITY_DN85184_c1_g1	GO:0002238, response to molecule of fungal origin;GO:0005783, endoplasmic reticulum;GO:0005789, endoplasmic reticulum membrane;GO:0005794, Golgi apparatus;GO:0005886, plasma membrane;GO:0016021, integral component of membrane;GO:0042759, long-chain fatty acid biosynthetic process;GO:0046513, ceramide biosynthetic process;GO:0050291, sphingosine N-acyltransferase activity	-
TRINITY_DN1308_c0_g1	GO:0008080, N-acetyltransferase activity	-
TRINITY_DN156383_c0_g1	GO:0002161, aminoacyl-tRNA editing activity;GO:0004832, valine-tRNA ligase activity;GO:0005524, ATP binding;GO:0005737, cytoplasm;GO:0006438, valyl-tRNA aminoacylation	-
TRINITY_DN11514_c0_g1	-	-
TRINITY_DN54884_c0_g1	GO:0000987, core promoter proximal region sequence-specific DNA binding;GO:0005634, nucleus;GO:0005737, cytoplasm;GO:0006351, transcription, DNA-templated;GO:0006355, regulation of transcription, DNA-templated;GO:0008270, zinc ion binding;GO:0016363, nuclear matrix;GO:0016607, nuclear speck;GO:0035097, histone methyltransferase complex;GO:0042800, histone methyltransferase activity (H3-K4 specifi…	-
TRINITY_DN169221_c0_g1	GO:0002102, podosome;GO:0005737, cytoplasm;GO:0006801, superoxide metabolic process;GO:0016176, superoxide-generating NADPH oxidase activator activity;GO:0030054, cell junction;GO:0035091, phosphatidylinositol binding;GO:0042995, cell projection;GO:0055114, oxidation-reduction process;GO:0071800, podosome assembly;GO:0072593, reactive oxygen species metabolic process;GO:0072675, osteoclast fusion	-
TRINITY_DN106348_c0_g1	GO:0005739, mitochondrion;GO:0005743, mitochondrial inner membrane;GO:0006116, NADH oxidation;GO:0008137, NADH dehydrogenase (ubiquinone) activity;GO:0016021, integral component of membrane;GO:0016491, oxidoreductase activity;GO:0042775, mitochondrial ATP synthesis coupled electron transport	-
TRINITY_DN63360_c0_g1	-	-
TRINITY_DN25188_c0_g1	GO:0000209, protein polyubiquitination;GO:0005737, cytoplasm;GO:0008270, zinc ion binding;GO:0016567, protein ubiquitination;GO:0016874, ligase activity;GO:0042787, protein ubiquitination involved in ubiquitin-dependent protein catabolic process;GO:0043161, proteasome-mediated ubiquitin-dependent protein catabolic process;GO:0061630, ubiquitin protein ligase activity	-
TRINITY_DN169096_c0_g1	GO:0005506, iron ion binding;GO:0016020, membrane;GO:0016712, oxidoreductase activity, acting on paired donors, with incorporation or reduction of molecular oxygen, reduced flavin or flavoprotein as one donor, and incorporation of one atom of oxygen;GO:0020037, heme binding	-
TRINITY_DN112080_c0_g1	-	-
TRINITY_DN106206_c0_g1	-	-
TRINITY_DN142581_c0_g1	GO:0003746, translation elongation factor activity;GO:0004364, glutathione transferase activity;GO:0005634, nucleus;GO:0005737, cytoplasm;GO:0005773, vacuole;GO:0005829, cytosol;GO:0005886, plasma membrane;GO:0006749, glutathione metabolic process;GO:0009506, plasmodesma	-
TRINITY_DN81511_c0_g2	GO:0005774, vacuolar membrane;GO:0005886, plasma membrane;GO:0006885, regulation of pH;GO:0009651, response to salt stress;GO:0015081, sodium ion transmembrane transporter activity;GO:0015385, sodium:proton antiporter activity;GO:0016021, integral component of membrane;GO:0055075, potassium ion homeostasis	-
TRINITY_DN81511_c0_g1	GO:0005774, vacuolar membrane;GO:0005886, plasma membrane;GO:0006885, regulation of pH;GO:0009651, response to salt stress;GO:0010107, potassium ion import;GO:0015385, sodium:proton antiporter activity;GO:0015386, potassium:proton antiporter activity;GO:0016021, integral component of membrane;GO:0055075, potassium ion homeostasis;GO:0090333, regulation of stomatal closure	-
TRINITY_DN106453_c0_g1	GO:0003677, DNA binding;GO:0005634, nucleus;GO:0006351, transcription, DNA-templated;GO:0006355, regulation of transcription, DNA-templated	-
TRINITY_DN143430_c0_g1	-	-
TRINITY_DN145622_c0_g1	GO:0003937, IMP cyclohydrolase activity;GO:0004643, phosphoribosylaminoimidazolecarboxamide formyltransferase activity;GO:0005829, cytosol;GO:0006188, IMP biosynthetic process;GO:0006189, 'de novo' IMP biosynthetic process	-
TRINITY_DN88672_c1_g1	GO:0005789, endoplasmic reticulum membrane;GO:0016021, integral component of membrane	K13989-ko04141 Protein processing in endoplasmic reticulum
TRINITY_DN99889_c0_g1	GO:0006450, regulation of translational fidelity	-
TRINITY_DN88672_c1_g3	-	-
TRINITY_DN88672_c1_g2	GO:0005789, endoplasmic reticulum membrane;GO:0016021, integral component of membrane	-
TRINITY_DN13288_c0_g1	GO:0003755, peptidyl-prolyl cis-trans isomerase activity;GO:0005788, endoplasmic reticulum lumen;GO:0006457, protein folding;GO:0042277, peptide binding	-
TRINITY_DN36058_c0_g1	-	-
TRINITY_DN75936_c1_g2	-	-
TRINITY_DN5226_c0_g1	GO:0005096, GTPase activator activity;GO:0005829, cytosol;GO:0005886, plasma membrane;GO:0006897, endocytosis;GO:0009733, response to auxin;GO:0009965, leaf morphogenesis;GO:0010051, xylem and phloem pattern formation;GO:0010087, phloem or xylem histogenesis;GO:0030140, trans-Golgi network transport vesicle;GO:0035091, phosphatidylinositol binding;GO:0046872, metal ion binding	-
TRINITY_DN80621_c0_g1	GO:0005886, plasma membrane;GO:0016021, integral component of membrane;GO:0017000, antibiotic biosynthetic process;GO:0046677, response to antibiotic;GO:0055085, transmembrane transport	-
TRINITY_DN189880_c0_g1	-	-
TRINITY_DN209815_c0_g1	-	-
TRINITY_DN50347_c0_g1	GO:0000140, acylglycerone-phosphate reductase activity;GO:0000329, fungal-type vacuole membrane;GO:0005737, cytoplasm;GO:0005739, mitochondrion;GO:0005783, endoplasmic reticulum;GO:0005794, Golgi apparatus;GO:0006654, phosphatidic acid biosynthetic process;GO:0016491, oxidoreductase activity	-
TRINITY_DN152669_c0_g1	-	-
TRINITY_DN174733_c0_g1	GO:0004674, protein serine/threonine kinase activity;GO:0005524, ATP binding;GO:0005737, cytoplasm;GO:0005829, cytosol;GO:0006468, protein phosphorylation;GO:0006888, ER to Golgi vesicle-mediated transport;GO:0012505, endomembrane system;GO:0016242, negative regulation of macroautophagy;GO:0030182, neuron differentiation;GO:0035556, intracellular signal transduction;GO:0043524, negative regulatio…	-
TRINITY_DN172366_c0_g1	GO:0000932, P-body;GO:0003723, RNA binding;GO:0005737, cytoplasm;GO:0005829, cytosol;GO:0005887, integral component of plasma membrane;GO:0010494, cytoplasmic stress granule;GO:0016020, membrane;GO:0017148, negative regulation of translation;GO:0030425, dendrite;GO:0050775, positive regulation of dendrite morphogenesis;GO:0061003, positive regulation of dendritic spine morphogenesis	-
TRINITY_DN90055_c1_g5	-	-
TRINITY_DN90055_c1_g4	GO:0004674, protein serine/threonine kinase activity;GO:0005524, ATP binding;GO:0005634, nucleus;GO:0005737, cytoplasm;GO:0006468, protein phosphorylation;GO:0006970, response to osmotic stress;GO:0009651, response to salt stress;GO:0016301, kinase activity;GO:0035556, intracellular signal transduction	-
TRINITY_DN90055_c1_g3	GO:0004674, protein serine/threonine kinase activity;GO:0005524, ATP binding;GO:0005622, intracellular;GO:0005634, nucleus;GO:0005737, cytoplasm;GO:0006468, protein phosphorylation;GO:0035556, intracellular signal transduction	-
TRINITY_DN90055_c1_g2	-	-
TRINITY_DN90055_c1_g1	GO:0008299, isoprenoid biosynthetic process;GO:0009507, chloroplast;GO:0009570, chloroplast stroma;GO:0019288, isopentenyl diphosphate biosynthetic process, methylerythritol 4-phosphate pathway;GO:0050518, 2-C-methyl-D-erythritol 4-phosphate cytidylyltransferase activity	K00991-ko00900 Terpenoid backbone biosynthesis
TRINITY_DN189871_c0_g1	-	-
TRINITY_DN185597_c0_g1	GO:0001893, maternal placenta development;GO:0005739, mitochondrion;GO:0005769, early endosome;GO:0007005, mitochondrion organization;GO:0008284, positive regulation of cell proliferation;GO:0008379, thioredoxin peroxidase activity;GO:0008385, IkappaB kinase complex;GO:0018171, peptidyl-cysteine oxidation;GO:0030099, myeloid cell differentiation;GO:0032496, response to lipopolysaccharide;GO:00336…	-
TRINITY_DN146251_c0_g1	GO:0008270, zinc ion binding;GO:0016479, negative regulation of transcription from RNA polymerase I promoter;GO:0031939, negative regulation of chromatin silencing at telomere;GO:0033698, Rpd3L complex;GO:0061186, negative regulation of chromatin silencing at silent mating-type cassette;GO:0061188, negative regulation of chromatin silencing at rDNA;GO:0061408, positive regulation of transcription…	-
TRINITY_DN108256_c0_g1	-	-
TRINITY_DN80903_c2_g1	GO:0003735, structural constituent of ribosome;GO:0005840, ribosome;GO:0006412, translation	-
TRINITY_DN92485_c1_g1	GO:0003676, nucleic acid binding;GO:0003677, DNA binding;GO:0003723, RNA binding;GO:0003887, DNA-directed DNA polymerase activity;GO:0003964, RNA-directed DNA polymerase activity;GO:0004190, aspartic-type endopeptidase activity;GO:0004519, endonuclease activity;GO:0005634, nucleus;GO:0005737, cytoplasm;GO:0006310, DNA recombination;GO:0015074, DNA integration;GO:0046872, metal ion binding	-
TRINITY_DN154652_c0_g1	-	-
TRINITY_DN39113_c0_g1	-	-
TRINITY_DN93796_c0_g1	-	-
TRINITY_DN218833_c0_g1	-	-
TRINITY_DN201535_c0_g1	-	-
TRINITY_DN204621_c0_g1	GO:0000038, very long-chain fatty acid metabolic process;GO:0004467, long-chain fatty acid-CoA ligase activity;GO:0005324, long-chain fatty acid transporter activity;GO:0005777, peroxisome;GO:0005783, endoplasmic reticulum;GO:0005811, lipid particle;GO:0006633, fatty acid biosynthetic process;GO:0031235, intrinsic component of the cytoplasmic side of the plasma membrane;GO:0031957, very long-chai…	-
TRINITY_DN182911_c0_g1	-	-
TRINITY_DN182683_c0_g1	-	-
TRINITY_DN177469_c0_g1	GO:0016491, oxidoreductase activity;GO:0046872, metal ion binding;GO:0051537, 2 iron, 2 sulfur cluster binding	-
TRINITY_DN76339_c0_g1	GO:0005737, cytoplasm;GO:0005874, microtubule;GO:0006412, translation	-
TRINITY_DN182867_c0_g1	-	-
TRINITY_DN76339_c0_g2	GO:0005737, cytoplasm;GO:0005874, microtubule;GO:0006412, translation	-
TRINITY_DN101563_c0_g1	GO:0005524, ATP binding;GO:0005886, plasma membrane;GO:0006811, ion transport;GO:0016887, ATPase activity;GO:0055072, iron ion homeostasis	-
TRINITY_DN26794_c0_g1	GO:0005634, nucleus;GO:0006351, transcription, DNA-templated;GO:0006355, regulation of transcription, DNA-templated;GO:0008168, methyltransferase activity;GO:0030435, sporulation resulting in formation of a cellular spore	-
TRINITY_DN135918_c0_g1	GO:0001934, positive regulation of protein phosphorylation;GO:0005634, nucleus;GO:0005730, nucleolus;GO:0005737, cytoplasm;GO:0010976, positive regulation of neuron projection development;GO:0030036, actin cytoskeleton organization;GO:0044306, neuron projection terminus;GO:0046872, metal ion binding;GO:0048471, perinuclear region of cytoplasm	-
TRINITY_DN116885_c0_g1	-	-
TRINITY_DN82911_c0_g1	-	-
TRINITY_DN196478_c0_g1	-	-
TRINITY_DN82189_c2_g2	GO:0003700, transcription factor activity, sequence-specific DNA binding;GO:0005634, nucleus;GO:0006351, transcription, DNA-templated;GO:0006952, defense response;GO:0043565, sequence-specific DNA binding	-
TRINITY_DN82189_c2_g1	GO:0003700, transcription factor activity, sequence-specific DNA binding;GO:0005634, nucleus;GO:0006351, transcription, DNA-templated;GO:0043565, sequence-specific DNA binding;GO:0044212, transcription regulatory region DNA binding	-
TRINITY_DN143451_c0_g1	GO:0005886, plasma membrane;GO:0006810, transport;GO:0016021, integral component of membrane	-
TRINITY_DN202679_c0_g1	-	-
TRINITY_DN9626_c0_g1	-	-
TRINITY_DN164440_c0_g1	GO:0003994, aconitate hydratase activity;GO:0005634, nucleus;GO:0005739, mitochondrion;GO:0006099, tricarboxylic acid cycle;GO:0046872, metal ion binding;GO:0051539, 4 iron, 4 sulfur cluster binding	-
TRINITY_DN111368_c0_g1	GO:0004842, ubiquitin-protein transferase activity;GO:0005634, nucleus;GO:0005737, cytoplasm;GO:0005743, mitochondrial inner membrane;GO:0005814, centriole;GO:0006281, DNA repair;GO:0006974, cellular response to DNA damage stimulus;GO:0007283, spermatogenesis;GO:0008270, zinc ion binding;GO:0016020, membrane;GO:0016567, protein ubiquitination;GO:0016874, ligase activity;GO:0031625, ubiquitin prot…	-
TRINITY_DN184496_c0_g1	-	-
TRINITY_DN184353_c0_g1	-	-
TRINITY_DN160817_c0_g1	-	-
TRINITY_DN114731_c0_g1	GO:0004089, carbonate dehydratase activity;GO:0005737, cytoplasm;GO:0005886, plasma membrane;GO:0006730, one-carbon metabolic process;GO:0008270, zinc ion binding	-
TRINITY_DN207812_c0_g1	GO:0008152, metabolic process;GO:0016787, hydrolase activity	-
TRINITY_DN32385_c0_g1	GO:0005886, plasma membrane;GO:0005975, carbohydrate metabolic process;GO:0016901, oxidoreductase activity, acting on the CH-OH group of donors, quinone or similar compound as acceptor;GO:0031225, anchored component of membrane;GO:0046658, anchored component of plasma membrane;GO:0048038, quinone binding	-
TRINITY_DN91870_c0_g2	GO:0004029, aldehyde dehydrogenase (NAD) activity;GO:0005737, cytoplasm;GO:0006068, ethanol catabolic process;GO:0016620, oxidoreductase activity, acting on the aldehyde or oxo group of donors, NAD or NADP as acceptor	-
TRINITY_DN91870_c0_g3	GO:0004029, aldehyde dehydrogenase (NAD) activity;GO:0005737, cytoplasm;GO:0006081, cellular aldehyde metabolic process;GO:0006598, polyamine catabolic process;GO:0015940, pantothenate biosynthetic process;GO:0016620, oxidoreductase activity, acting on the aldehyde or oxo group of donors, NAD or NADP as acceptor;GO:0019483, beta-alanine biosynthetic process	-
TRINITY_DN88418_c0_g1	GO:0005789, endoplasmic reticulum membrane;GO:0006506, GPI anchor biosynthetic process;GO:0016021, integral component of membrane;GO:0016758, transferase activity, transferring hexosyl groups	-
TRINITY_DN88418_c0_g2	GO:0005634, nucleus;GO:0005737, cytoplasm;GO:0008198, ferrous iron binding;GO:0017183, peptidyl-diphthamide biosynthetic process from peptidyl-histidine	-
TRINITY_DN88418_c0_g3	-	-
TRINITY_DN88418_c0_g4	-	-
TRINITY_DN88418_c0_g5	-	-
TRINITY_DN215542_c0_g1	-	-
TRINITY_DN114080_c0_g1	-	-
TRINITY_DN75957_c0_g1	-	-
TRINITY_DN82583_c1_g1	-	-
TRINITY_DN123310_c0_g1	GO:0016491, oxidoreductase activity	-
TRINITY_DN102286_c0_g1	GO:0000139, Golgi membrane;GO:0003924, GTPase activity;GO:0005525, GTP binding;GO:0005622, intracellular;GO:0005634, nucleus;GO:0005789, endoplasmic reticulum membrane;GO:0005829, cytosol;GO:0006886, intracellular protein transport;GO:0006888, ER to Golgi vesicle-mediated transport;GO:0006914, autophagy;GO:0007264, small GTPase mediated signal transduction;GO:0034045, pre-autophagosomal structure…	-
TRINITY_DN111554_c0_g1	-	-
TRINITY_DN97382_c1_g1	GO:0000166, nucleotide binding;GO:0003723, RNA binding;GO:0005634, nucleus	-
TRINITY_DN66065_c0_g1	GO:0003847, 1-alkyl-2-acetylglycerophosphocholine esterase activity;GO:0016021, integral component of membrane;GO:0016042, lipid catabolic process	-
TRINITY_DN66065_c0_g2	GO:0003847, 1-alkyl-2-acetylglycerophosphocholine esterase activity;GO:0016021, integral component of membrane;GO:0016042, lipid catabolic process	-
TRINITY_DN97382_c1_g2	GO:0005739, mitochondrion	-
TRINITY_DN97382_c1_g5	-	-
TRINITY_DN97382_c1_g4	GO:0006306, DNA methylation;GO:0030422, production of siRNA involved in RNA interference	-
TRINITY_DN97382_c1_g6	-	-
TRINITY_DN97304_c2_g2	-	-
TRINITY_DN97304_c2_g3	GO:0000790, nuclear chromatin;GO:0003677, DNA binding;GO:0006260, DNA replication;GO:0006281, DNA repair;GO:0007131, reciprocal meiotic recombination;GO:0007141, male meiosis I;GO:0009555, pollen development;GO:0046872, metal ion binding;GO:0048232, male gamete generation;GO:0051026, chiasma assembly	K07466-ko03440 Homologous recombination;ko03460 Fanconi anemia pathway;ko03430 Mismatch repair;ko03030 DNA replication;ko03420 Nucleotide excision repair
TRINITY_DN97304_c2_g1	GO:0000790, nuclear chromatin;GO:0003677, DNA binding;GO:0005634, nucleus;GO:0006260, DNA replication;GO:0006281, DNA repair;GO:0006310, DNA recombination;GO:0007131, reciprocal meiotic recombination;GO:0007141, male meiosis I;GO:0009555, pollen development;GO:0046872, metal ion binding;GO:0048232, male gamete generation;GO:0051026, chiasma assembly	-
TRINITY_DN125147_c0_g1	GO:0000011, vacuole inheritance;GO:0003677, DNA binding;GO:0005737, cytoplasm;GO:0005794, Golgi apparatus;GO:0005829, cytosol;GO:0006281, DNA repair;GO:0006895, Golgi to endosome transport;GO:0006896, Golgi to vacuole transport;GO:0006897, endocytosis;GO:0006904, vesicle docking involved in exocytosis;GO:0006906, vesicle fusion;GO:0010009, cytoplasmic side of endosome membrane;GO:0017137, Rab GTP…	-
TRINITY_DN175682_c0_g1	-	-
TRINITY_DN123794_c0_g1	-	-
TRINITY_DN68480_c0_g1	GO:0004084, branched-chain-amino-acid transaminase activity;GO:0005739, mitochondrion;GO:0005759, mitochondrial matrix;GO:0006532, aspartate biosynthetic process;GO:0009082, branched-chain amino acid biosynthetic process;GO:0009083, branched-chain amino acid catabolic process;GO:0009097, isoleucine biosynthetic process;GO:0009098, leucine biosynthetic process;GO:0009099, valine biosynthetic proce…	-
TRINITY_DN92591_c1_g1	GO:0003676, nucleic acid binding;GO:0005739, mitochondrion;GO:0015074, DNA integration	-
TRINITY_DN92591_c1_g2	-	-
TRINITY_DN68480_c0_g2	GO:0004084, branched-chain-amino-acid transaminase activity;GO:0005739, mitochondrion;GO:0005759, mitochondrial matrix;GO:0006532, aspartate biosynthetic process;GO:0009082, branched-chain amino acid biosynthetic process;GO:0009083, branched-chain amino acid catabolic process;GO:0009097, isoleucine biosynthetic process;GO:0009098, leucine biosynthetic process;GO:0009099, valine biosynthetic proce…	-
TRINITY_DN63359_c0_g1	-	-
TRINITY_DN92591_c1_g5	-	-
TRINITY_DN92591_c1_g6	GO:0000502, proteasome complex;GO:0005524, ATP binding;GO:0005634, nucleus;GO:0005737, cytoplasm;GO:0007292, female gamete generation;GO:0008233, peptidase activity;GO:0008568, microtubule-severing ATPase activity;GO:0009408, response to heat;GO:0009933, meristem structural organization;GO:0009965, leaf morphogenesis;GO:0010015, root morphogenesis;GO:0010078, maintenance of root meristem identity…	K03062-ko03050 Proteasome
TRINITY_DN92591_c1_g7	GO:0000502, proteasome complex;GO:0005524, ATP binding;GO:0005634, nucleus;GO:0007292, female gamete generation;GO:0009408, response to heat;GO:0009933, meristem structural organization;GO:0009965, leaf morphogenesis;GO:0010015, root morphogenesis;GO:0010078, maintenance of root meristem identity;GO:0010311, lateral root formation;GO:0016020, membrane;GO:0017025, TBP-class protein binding;GO:0030…	-
TRINITY_DN187780_c0_g1	GO:0004553, hydrolase activity, hydrolyzing O-glycosyl compounds;GO:0005886, plasma membrane;GO:0005975, carbohydrate metabolic process;GO:0009251, glucan catabolic process;GO:0030245, cellulose catabolic process;GO:0031225, anchored component of membrane;GO:0042972, licheninase activity;GO:0052861, glucan endo-1,3-beta-glucanase activity, C-3 substituted reducing group;GO:0052862, glucan endo-1,…	-
TRINITY_DN96140_c1_g1	-	-
TRINITY_DN94399_c1_g6	GO:0006629, lipid metabolic process;GO:0016021, integral component of membrane;GO:0016787, hydrolase activity	-
TRINITY_DN120536_c0_g1	GO:0030289, protein phosphatase 4 complex	-
TRINITY_DN163303_c0_g1	GO:0000981, RNA polymerase II transcription factor activity, sequence-specific DNA binding;GO:0003677, DNA binding;GO:0005634, nucleus;GO:0006351, transcription, DNA-templated;GO:0008270, zinc ion binding;GO:0016021, integral component of membrane	-
TRINITY_DN100775_c0_g1	GO:0005215, transporter activity;GO:0005886, plasma membrane;GO:0016021, integral component of membrane	-
TRINITY_DN168215_c0_g1	GO:0005737, cytoplasm;GO:0006952, defense response;GO:0006979, response to oxidative stress;GO:0009751, response to salicylic acid;GO:0009816, defense response to bacterium, incompatible interaction	-
TRINITY_DN95269_c0_g1	GO:0004672, protein kinase activity;GO:0004674, protein serine/threonine kinase activity;GO:0005524, ATP binding;GO:0016021, integral component of membrane;GO:0032440, 2-alkenal reductase [NAD(P)] activity	-
TRINITY_DN73878_c0_g1	-	-
TRINITY_DN87453_c3_g1	GO:0009231, riboflavin biosynthetic process;GO:0009349, riboflavin synthase complex;GO:0009507, chloroplast;GO:0009570, chloroplast stroma;GO:0016740, transferase activity	K00794-ko00740 Riboflavin metabolism
TRINITY_DN84310_c1_g1	GO:0006486, protein glycosylation;GO:0008417, fucosyltransferase activity;GO:0010493, Lewis a epitope biosynthetic process;GO:0016021, integral component of membrane;GO:0032580, Golgi cisterna membrane;GO:0071555, cell wall organization	K14412-ko00513 Various types of N-glycan biosynthesis
TRINITY_DN89824_c1_g1	GO:0005634, nucleus;GO:0005737, cytoplasm;GO:0005815, microtubule organizing center;GO:0008270, zinc ion binding;GO:0070062, extracellular exosome	-
TRINITY_DN54903_c0_g1	GO:0005886, plasma membrane;GO:0015232, heme transporter activity;GO:0016021, integral component of membrane;GO:0017004, cytochrome complex assembly;GO:0020037, heme binding	-
TRINITY_DN89824_c1_g3	GO:0003677, DNA binding;GO:0004190, aspartic-type endopeptidase activity;GO:0005783, endoplasmic reticulum;GO:0009414, response to water deprivation;GO:0009627, systemic acquired resistance;GO:0009737, response to abscisic acid;GO:0030163, protein catabolic process;GO:0070001, aspartic-type peptidase activity	-
TRINITY_DN89824_c1_g2	-	-
TRINITY_DN89824_c1_g5	GO:0005739, mitochondrion	-
TRINITY_DN89824_c1_g4	-	-
TRINITY_DN89824_c1_g7	GO:0046872, metal ion binding	-
TRINITY_DN69475_c0_g1	GO:0005747, mitochondrial respiratory chain complex I;GO:0006120, mitochondrial electron transport, NADH to ubiquinone	-
TRINITY_DN88590_c2_g7	-	-
TRINITY_DN65405_c0_g1	GO:0005634, nucleus;GO:0005829, cytosol;GO:0007346, regulation of mitotic cell cycle;GO:0008022, protein C-terminus binding;GO:0008641, small protein activating enzyme activity;GO:0016925, protein sumoylation;GO:0019948, SUMO activating enzyme activity;GO:0031510, SUMO activating enzyme complex;GO:1903955, positive regulation of protein targeting to mitochondrion	K10684-ko04120 Ubiquitin mediated proteolysis
TRINITY_DN188175_c0_g1	GO:0003677, DNA binding;GO:0005829, cytosol;GO:0008824, cyanate hydratase activity;GO:0009440, cyanate catabolic process;GO:0009651, response to salt stress;GO:0042802, identical protein binding	-
TRINITY_DN158869_c0_g1	-	-
TRINITY_DN88590_c2_g6	-	-
TRINITY_DN162354_c0_g1	GO:0005634, nucleus;GO:0005829, cytosol;GO:0046872, metal ion binding	-
TRINITY_DN123897_c0_g1	-	-
TRINITY_DN184235_c0_g1	GO:0004856, xylulokinase activity;GO:0005524, ATP binding;GO:0005997, xylulose metabolic process;GO:0042732, D-xylose metabolic process	-
TRINITY_DN88176_c1_g1	-	-
TRINITY_DN193210_c0_g1	-	-
TRINITY_DN71966_c0_g1	-	-
TRINITY_DN119416_c0_g1	GO:0004553, hydrolase activity, hydrolyzing O-glycosyl compounds;GO:0005975, carbohydrate metabolic process	-
TRINITY_DN136954_c0_g1	-	-
TRINITY_DN128063_c0_g1	GO:0005506, iron ion binding;GO:0016114, terpenoid biosynthetic process;GO:0019288, isopentenyl diphosphate biosynthetic process, methylerythritol 4-phosphate pathway;GO:0046429, 4-hydroxy-3-methylbut-2-en-1-yl diphosphate synthase activity;GO:0051539, 4 iron, 4 sulfur cluster binding	K03526-ko00900 Terpenoid backbone biosynthesis
TRINITY_DN65504_c0_g2	-	-
TRINITY_DN65504_c0_g1	-	-
TRINITY_DN123323_c0_g1	GO:0003723, RNA binding;GO:0005634, nucleus	-
TRINITY_DN27571_c0_g1	-	-
TRINITY_DN106600_c0_g1	-	-
TRINITY_DN217616_c0_g1	-	-
TRINITY_DN81086_c0_g2	GO:0000118, histone deacetylase complex;GO:0000122, negative regulation of transcription from RNA polymerase II promoter;GO:0000790, nuclear chromatin;GO:0001701, in utero embryonic development;GO:0003007, heart morphogenesis;GO:0003677, DNA binding;GO:0003682, chromatin binding;GO:0003714, transcription corepressor activity;GO:0005112, Notch binding;GO:0005634, nucleus;GO:0005654, nucleoplasm;GO…	-
TRINITY_DN111784_c0_g1	GO:0031305, integral component of mitochondrial inner membrane;GO:0033617, mitochondrial respiratory chain complex IV assembly	-
TRINITY_DN90942_c0_g1	GO:0003009, skeletal muscle contraction;GO:0005861, troponin complex;GO:0006937, regulation of muscle contraction;GO:0014883, transition between fast and slow fiber;GO:0045932, negative regulation of muscle contraction	-
TRINITY_DN82942_c2_g1	-	-
TRINITY_DN144997_c0_g1	GO:0000244, spliceosomal tri-snRNP complex assembly;GO:0000386, second spliceosomal transesterification activity;GO:0000398, mRNA splicing, via spliceosome;GO:0005681, spliceosomal complex;GO:0005682, U5 snRNP;GO:0017070, U6 snRNA binding;GO:0030619, U1 snRNA binding;GO:0030620, U2 snRNA binding;GO:0030623, U5 snRNA binding;GO:0071013, catalytic step 2 spliceosome;GO:0097157, pre-mRNA intronic bi…	-
TRINITY_DN92295_c1_g3	-	-
TRINITY_DN92295_c1_g2	-	-
TRINITY_DN92295_c1_g1	-	-
TRINITY_DN148948_c0_g1	-	-
TRINITY_DN79600_c0_g1	-	-
TRINITY_DN212676_c0_g1	GO:0000028, ribosomal small subunit assembly;GO:0003729, mRNA binding;GO:0003735, structural constituent of ribosome;GO:0005739, mitochondrion;GO:0005763, mitochondrial small ribosomal subunit;GO:0006412, translation;GO:0019843, rRNA binding;GO:0032543, mitochondrial translation	-
TRINITY_DN79600_c0_g3	GO:0003743, translation initiation factor activity;GO:0005524, ATP binding;GO:0005634, nucleus;GO:0005737, cytoplasm;GO:0005829, cytosol;GO:0006364, rRNA processing;GO:0006810, transport;GO:0016887, ATPase activity;GO:0046872, metal ion binding;GO:0051539, 4 iron, 4 sulfur cluster binding	-
TRINITY_DN79600_c0_g2	-	-
TRINITY_DN126217_c0_g1	-	-
TRINITY_DN203326_c0_g1	-	-
TRINITY_DN99458_c0_g1	-	-
TRINITY_DN80745_c0_g1	GO:0002181, cytoplasmic translation;GO:0003723, RNA binding;GO:0003735, structural constituent of ribosome;GO:0005829, cytosol;GO:0005840, ribosome;GO:0006412, translation;GO:0022625, cytosolic large ribosomal subunit	K02873-ko03010 Ribosome
TRINITY_DN168506_c0_g1	GO:0016021, integral component of membrane	-
TRINITY_DN164045_c0_g1	GO:0003677, DNA binding;GO:0005634, nucleus;GO:0006351, transcription, DNA-templated;GO:0008270, zinc ion binding	-
TRINITY_DN87417_c0_g1	-	-
TRINITY_DN72375_c0_g1	GO:0015140, malate transmembrane transporter activity;GO:0016021, integral component of membrane;GO:0055085, transmembrane transport	-
TRINITY_DN103856_c0_g1	GO:0016853, isomerase activity	-
TRINITY_DN87575_c1_g4	GO:0000287, magnesium ion binding;GO:0008897, holo-[acyl-carrier-protein] synthase activity	-
TRINITY_DN125870_c0_g1	GO:0005737, cytoplasm;GO:0070475, rRNA base methylation;GO:0071424, rRNA (cytosine-N4-)-methyltransferase activity	-
TRINITY_DN87575_c1_g1	GO:0000287, magnesium ion binding;GO:0005737, cytoplasm;GO:0008897, holo-[acyl-carrier-protein] synthase activity;GO:0019878, lysine biosynthetic process via aminoadipic acid;GO:0070062, extracellular exosome	K06133-ko00770 Pantothenate and CoA biosynthesis
TRINITY_DN87575_c1_g2	GO:0005829, cytosol	-
TRINITY_DN87575_c1_g3	-	-
TRINITY_DN92786_c0_g1	-	-
TRINITY_DN77830_c0_g1	GO:0005507, copper ion binding;GO:0005737, cytoplasm;GO:0005829, cytosol;GO:0006878, cellular copper ion homeostasis;GO:0008131, primary amine oxidase activity;GO:0009310, amine catabolic process;GO:0042764, ascospore-type prospore;GO:0048038, quinone binding;GO:0052593, tryptamine:oxygen oxidoreductase (deaminating) activity;GO:0052594, aminoacetone:oxygen oxidoreductase(deaminating) activity;GO…	-
TRINITY_DN92786_c0_g3	-	-
TRINITY_DN92786_c0_g2	-	-
TRINITY_DN92786_c0_g5	-	-
TRINITY_DN92786_c0_g4	-	-
TRINITY_DN86178_c2_g1	-	-
TRINITY_DN195010_c0_g1	-	-
TRINITY_DN81324_c3_g3	-	-
TRINITY_DN86304_c0_g3	-	-
TRINITY_DN175857_c0_g1	GO:0009055, electron carrier activity;GO:0020037, heme binding	-
TRINITY_DN217263_c0_g1	GO:0004806, triglyceride lipase activity;GO:0016042, lipid catabolic process	-
TRINITY_DN55232_c0_g1	GO:0005507, copper ion binding;GO:0005576, extracellular region;GO:0016491, oxidoreductase activity	-
TRINITY_DN211241_c0_g1	-	-
TRINITY_DN116225_c0_g1	-	-
TRINITY_DN177205_c0_g1	GO:0005215, transporter activity;GO:0006810, transport;GO:0015293, symporter activity;GO:0016020, membrane;GO:0016021, integral component of membrane;GO:0034220, ion transmembrane transport;GO:0055085, transmembrane transport;GO:0071627, integral component of fungal-type vacuolar membrane	-
TRINITY_DN120615_c0_g1	GO:0003723, RNA binding;GO:0005634, nucleus;GO:0006366, transcription from RNA polymerase II promoter;GO:0006397, mRNA processing;GO:0008380, RNA splicing	-
TRINITY_DN86301_c4_g1	-	-
TRINITY_DN103947_c0_g1	-	-
TRINITY_DN129876_c0_g1	GO:0016021, integral component of membrane	-
TRINITY_DN119271_c0_g1	-	-
TRINITY_DN55142_c0_g1	GO:0004456, phosphogluconate dehydratase activity;GO:0005829, cytosol;GO:0009082, branched-chain amino acid biosynthetic process;GO:0009255, Entner-Doudoroff pathway through 6-phosphogluconate	-
TRINITY_DN95501_c3_g4	GO:0004252, serine-type endopeptidase activity;GO:0005618, cell wall;GO:0009505, plant-type cell wall;GO:0032440, 2-alkenal reductase [NAD(P)] activity	-
TRINITY_DN95501_c3_g5	GO:0003676, nucleic acid binding;GO:0004523, RNA-DNA hybrid ribonuclease activity;GO:0046872, metal ion binding	-
TRINITY_DN95501_c3_g6	GO:0005576, extracellular region;GO:0005618, cell wall;GO:0030145, manganese ion binding;GO:0033609, oxalate metabolic process;GO:0045735, nutrient reservoir activity;GO:0046564, oxalate decarboxylase activity;GO:0048046, apoplast	-
TRINITY_DN66068_c0_g1	GO:0004100, chitin synthase activity;GO:0005886, plasma membrane;GO:0006031, chitin biosynthetic process;GO:0016021, integral component of membrane;GO:0071555, cell wall organization	-
TRINITY_DN95501_c3_g1	-	-
TRINITY_DN95501_c3_g2	GO:0004497, monooxygenase activity;GO:0004499, N,N-dimethylaniline monooxygenase activity;GO:0009626, plant-type hypersensitive response;GO:0009627, systemic acquired resistance;GO:0009870, defense response signaling pathway, resistance gene-dependent;GO:0010204, defense response signaling pathway, resistance gene-independent;GO:0042742, defense response to bacterium;GO:0050660, flavin adenine di…	K00485-ko00982 Drug metabolism - cytochrome P450
TRINITY_DN95501_c3_g3	GO:0000166, nucleotide binding;GO:0003676, nucleic acid binding;GO:0003723, RNA binding;GO:0006397, mRNA processing;GO:0009507, chloroplast;GO:0009570, chloroplast stroma;GO:0009579, thylakoid;GO:0030529, intracellular ribonucleoprotein complex	-
TRINITY_DN63345_c0_g2	GO:0005783, endoplasmic reticulum;GO:0005789, endoplasmic reticulum membrane;GO:0005794, Golgi apparatus;GO:0005886, plasma membrane;GO:0015031, protein transport;GO:0016021, integral component of membrane;GO:0055085, transmembrane transport;GO:1901583, tetrapeptide transmembrane transport;GO:1901584, tetrapeptide transmembrane transporter activity	-
TRINITY_DN49672_c0_g1	-	-
TRINITY_DN91426_c2_g1	-	-
TRINITY_DN117024_c0_g1	GO:0016787, hydrolase activity	-
TRINITY_DN163410_c0_g1	GO:0006979, response to oxidative stress;GO:0030091, protein repair;GO:0033743, peptide-methionine (R)-S-oxide reductase activity	-
TRINITY_DN81187_c0_g1	-	-
TRINITY_DN182075_c0_g1	-	-
TRINITY_DN81545_c2_g8	GO:0000122, negative regulation of transcription from RNA polymerase II promoter;GO:0003682, chromatin binding;GO:0003727, single-stranded RNA binding;GO:0005634, nucleus;GO:0006351, transcription, DNA-templated;GO:0016604, nuclear body;GO:0016607, nuclear speck;GO:0016874, ligase activity;GO:0016925, protein sumoylation;GO:0019789, SUMO transferase activity;GO:0019899, enzyme binding;GO:0031519,…	-
TRINITY_DN93344_c4_g1	GO:0000166, nucleotide binding;GO:0003676, nucleic acid binding;GO:0008270, zinc ion binding	-
TRINITY_DN94582_c1_g5	GO:0005794, Golgi apparatus	-
TRINITY_DN120277_c0_g1	-	-
TRINITY_DN81545_c2_g6	GO:0005737, cytoplasm;GO:0007283, spermatogenesis;GO:0008283, cell proliferation	-
TRINITY_DN61948_c0_g1	GO:0000139, Golgi membrane;GO:0004674, protein serine/threonine kinase activity;GO:0005524, ATP binding;GO:0010923, negative regulation of phosphatase activity;GO:0016021, integral component of membrane;GO:0030424, axon;GO:0030425, dendrite;GO:0046872, metal ion binding	-
TRINITY_DN104647_c0_g1	GO:0003677, DNA binding;GO:0006310, DNA recombination;GO:0015074, DNA integration	-
TRINITY_DN2053_c0_g1	-	-
TRINITY_DN81545_c2_g7	-	-
TRINITY_DN210811_c0_g1	GO:0016021, integral component of membrane	-
TRINITY_DN182510_c0_g1	GO:0003677, DNA binding;GO:0003700, transcription factor activity, sequence-specific DNA binding;GO:0006351, transcription, DNA-templated;GO:0010124, phenylacetate catabolic process;GO:0045892, negative regulation of transcription, DNA-templated	-
TRINITY_DN81545_c2_g4	GO:0001666, response to hypoxia;GO:0004459, L-lactate dehydrogenase activity;GO:0005634, nucleus;GO:0005737, cytoplasm;GO:0005829, cytosol;GO:0005975, carbohydrate metabolic process;GO:0006089, lactate metabolic process;GO:0006090, pyruvate metabolic process;GO:0006096, glycolytic process;GO:0007584, response to nutrient;GO:0009749, response to glucose;GO:0016020, membrane;GO:0019674, NAD metabol…	K00016-ko00010 Glycolysis / Gluconeogenesis;ko00620 Pyruvate metabolism;ko00640 Propanoate metabolism;ko00270 Cysteine and methionine metabolism
TRINITY_DN114214_c0_g1	GO:0002175, protein localization to paranode region of axon;GO:0005622, intracellular;GO:0005886, plasma membrane;GO:0005925, focal adhesion;GO:0007411, axon guidance;GO:0007422, peripheral nervous system development;GO:0016021, integral component of membrane;GO:0019226, transmission of nerve impulse;GO:0019904, protein domain specific binding;GO:0030913, paranodal junction assembly;GO:0033010, p…	-
TRINITY_DN98185_c0_g1	-	-
TRINITY_DN155567_c0_g1	-	-
TRINITY_DN46433_c0_g1	-	-
TRINITY_DN85615_c2_g1	GO:0003723, RNA binding	-
TRINITY_DN205181_c0_g1	-	-
TRINITY_DN171720_c0_g1	GO:0008718, D-amino-acid dehydrogenase activity;GO:0016491, oxidoreductase activity;GO:0019478, D-amino acid catabolic process	-
TRINITY_DN92941_c1_g6	-	-
TRINITY_DN121631_c0_g1	GO:0000038, very long-chain fatty acid metabolic process;GO:0003985, acetyl-CoA C-acetyltransferase activity;GO:0005739, mitochondrion;GO:0005777, peroxisome;GO:0006631, fatty acid metabolic process;GO:0006635, fatty acid beta-oxidation;GO:0008152, metabolic process;GO:0008206, bile acid metabolic process;GO:0008775, acetate CoA-transferase activity;GO:0016020, membrane;GO:0016401, palmitoyl-CoA …	-
TRINITY_DN85012_c0_g8	GO:0003700, transcription factor activity, sequence-specific DNA binding;GO:0005634, nucleus;GO:0006351, transcription, DNA-templated;GO:0006355, regulation of transcription, DNA-templated;GO:0043565, sequence-specific DNA binding	-
TRINITY_DN84889_c3_g1	GO:0005739, mitochondrion	-
TRINITY_DN70212_c0_g1	-	-
TRINITY_DN115160_c0_g1	-	-
TRINITY_DN148267_c0_g1	GO:0019172, glyoxalase III activity;GO:0019243, methylglyoxal catabolic process to D-lactate via S-lactoyl-glutathione	-
TRINITY_DN109995_c0_g1	GO:0000027, ribosomal large subunit assembly;GO:0003676, nucleic acid binding;GO:0004004, ATP-dependent RNA helicase activity;GO:0005524, ATP binding;GO:0005737, cytoplasm;GO:0005829, cytosol;GO:0008143, poly(A) binding;GO:0008186, RNA-dependent ATPase activity;GO:0010501, RNA secondary structure unwinding;GO:0033592, RNA strand annealing activity	-
TRINITY_DN81545_c2_g1	GO:0000398, mRNA splicing, via spliceosome;GO:0003723, RNA binding;GO:0005634, nucleus;GO:0005654, nucleoplasm;GO:0006351, transcription, DNA-templated;GO:0006355, regulation of transcription, DNA-templated;GO:0006396, RNA processing;GO:0009615, response to virus;GO:0019013, viral nucleocapsid;GO:0019899, enzyme binding;GO:0030529, intracellular ribonucleoprotein complex	-
TRINITY_DN121481_c0_g1	-	-
TRINITY_DN133829_c0_g1	-	-
TRINITY_DN56632_c0_g1	GO:0004096, catalase activity;GO:0005829, cytosol;GO:0010106, cellular response to iron ion starvation;GO:0020037, heme binding;GO:0030435, sporulation resulting in formation of a cellular spore;GO:0034605, cellular response to heat;GO:0042542, response to hydrogen peroxide;GO:0042744, hydrogen peroxide catabolic process;GO:0046872, metal ion binding;GO:0070301, cellular response to hydrogen pero…	-
TRINITY_DN212512_c0_g1	GO:0005681, spliceosomal complex;GO:0006397, mRNA processing;GO:0008380, RNA splicing;GO:0016607, nuclear speck;GO:0071001, U4/U6 snRNP;GO:0097525, spliceosomal snRNP complex	-
TRINITY_DN99451_c0_g1	GO:0005737, cytoplasm;GO:0016021, integral component of membrane;GO:0016605, PML body;GO:0045892, negative regulation of transcription, DNA-templated	-
TRINITY_DN35662_c0_g1	-	-
TRINITY_DN126330_c0_g1	GO:0016021, integral component of membrane	-
TRINITY_DN90540_c2_g1	-	-
TRINITY_DN146930_c0_g1	GO:0004028, 3-chloroallyl aldehyde dehydrogenase activity;GO:0004029, aldehyde dehydrogenase (NAD) activity;GO:0004030, aldehyde dehydrogenase [NAD(P)+] activity;GO:0006081, cellular aldehyde metabolic process;GO:0016021, integral component of membrane;GO:0016117, carotenoid biosynthetic process	-
TRINITY_DN90540_c2_g2	-	-
TRINITY_DN184352_c0_g1	GO:0004872, receptor activity;GO:0006810, transport;GO:0016020, membrane	-
TRINITY_DN94243_c4_g1	-	-
TRINITY_DN156628_c0_g1	-	-
TRINITY_DN34613_c1_g1	GO:0000287, magnesium ion binding;GO:0003824, catalytic activity;GO:0008152, metabolic process;GO:0009063, cellular amino acid catabolic process;GO:0050032, L-rhamnonate dehydratase activity	-
TRINITY_DN81754_c6_g2	GO:0005739, mitochondrion	-
TRINITY_DN81754_c6_g3	GO:0003676, nucleic acid binding;GO:0004190, aspartic-type endopeptidase activity;GO:0005524, ATP binding;GO:0008270, zinc ion binding;GO:0015074, DNA integration	-
TRINITY_DN75409_c0_g1	GO:0004109, coproporphyrinogen oxidase activity;GO:0005634, nucleus;GO:0005829, cytosol;GO:0006779, porphyrin-containing compound biosynthetic process;GO:0006782, protoporphyrinogen IX biosynthetic process;GO:0006783, heme biosynthetic process;GO:0042803, protein homodimerization activity;GO:0071456, cellular response to hypoxia	K00228-ko00860 Porphyrin and chlorophyll metabolism
TRINITY_DN81754_c6_g1	-	-
TRINITY_DN160469_c0_g1	-	-
TRINITY_DN90651_c1_g1	GO:0000989, transcription factor activity, transcription factor binding;GO:0003700, transcription factor activity, sequence-specific DNA binding;GO:0005634, nucleus;GO:0006351, transcription, DNA-templated;GO:0006355, regulation of transcription, DNA-templated;GO:0009739, response to gibberellin;GO:0043565, sequence-specific DNA binding	-
TRINITY_DN126783_c0_g1	-	-
TRINITY_DN90651_c1_g2	-	-
TRINITY_DN84781_c0_g1	GO:0005739, mitochondrion	-
TRINITY_DN139863_c0_g1	-	-
TRINITY_DN83714_c2_g3	-	-
TRINITY_DN181837_c0_g1	GO:0000149, SNARE binding;GO:0005484, SNAP receptor activity;GO:0005737, cytoplasm;GO:0005783, endoplasmic reticulum;GO:0005794, Golgi apparatus;GO:0006886, intracellular protein transport;GO:0006887, exocytosis;GO:0006897, endocytosis;GO:0006906, vesicle fusion;GO:0016021, integral component of membrane;GO:0016192, vesicle-mediated transport;GO:0030659, cytoplasmic vesicle membrane;GO:0031201, S…	-
TRINITY_DN84173_c1_g3	GO:0000123, histone acetyltransferase complex;GO:0005773, vacuole;GO:0016573, histone acetylation	-
TRINITY_DN20908_c0_g1	-	-
TRINITY_DN84173_c1_g1	-	-
TRINITY_DN84173_c1_g6	-	-
TRINITY_DN84173_c1_g5	-	-
TRINITY_DN84173_c1_g4	-	-
TRINITY_DN83058_c0_g1	GO:0004672, protein kinase activity;GO:0004674, protein serine/threonine kinase activity;GO:0005524, ATP binding;GO:0005886, plasma membrane;GO:0016021, integral component of membrane;GO:0016491, oxidoreductase activity	-
TRINITY_DN83058_c0_g3	GO:0004672, protein kinase activity;GO:0004674, protein serine/threonine kinase activity;GO:0005524, ATP binding;GO:0005886, plasma membrane;GO:0016021, integral component of membrane;GO:0016491, oxidoreductase activity	-
TRINITY_DN83058_c0_g2	GO:0004672, protein kinase activity;GO:0004674, protein serine/threonine kinase activity;GO:0005524, ATP binding;GO:0005886, plasma membrane;GO:0016021, integral component of membrane;GO:0016491, oxidoreductase activity	-
TRINITY_DN83058_c0_g4	-	-
TRINITY_DN191315_c0_g1	-	-
TRINITY_DN64329_c0_g1	GO:0000973, posttranscriptional tethering of RNA polymerase II gene DNA at nuclear periphery;GO:0003723, RNA binding;GO:0005215, transporter activity;GO:0005487, nucleocytoplasmic transporter activity;GO:0005635, nuclear envelope;GO:0005643, nuclear pore;GO:0005654, nucleoplasm;GO:0005829, cytosol;GO:0006260, DNA replication;GO:0006405, RNA export from nucleus;GO:0006406, mRNA export from nucleus…	-
TRINITY_DN109269_c0_g1	GO:0016021, integral component of membrane	-
TRINITY_DN170798_c0_g1	GO:0004222, metalloendopeptidase activity;GO:0005615, extracellular space;GO:0008270, zinc ion binding	-
TRINITY_DN180067_c0_g1	-	-
TRINITY_DN23364_c0_g1	-	-
TRINITY_DN23142_c0_g1	-	-
TRINITY_DN149642_c0_g1	GO:0000725, recombinational repair;GO:0003677, DNA binding;GO:0004386, helicase activity;GO:0005524, ATP binding;GO:0005634, nucleus;GO:0006281, DNA repair;GO:0033567, DNA replication, Okazaki fragment processing;GO:0036297, interstrand cross-link repair;GO:0043138, 3'-5' DNA helicase activity;GO:0060543, negative regulation of strand invasion;GO:0070336, flap-structured DNA binding	K10896-ko03460 Fanconi anemia pathway
TRINITY_DN170311_c0_g1	GO:0003870, 5-aminolevulinate synthase activity;GO:0005739, mitochondrion;GO:0005759, mitochondrial matrix;GO:0006782, protoporphyrinogen IX biosynthetic process;GO:0006783, heme biosynthetic process;GO:0008483, transaminase activity;GO:0030170, pyridoxal phosphate binding	-
TRINITY_DN91684_c1_g2	GO:0000274, mitochondrial proton-transporting ATP synthase, stator stalk;GO:0000276, mitochondrial proton-transporting ATP synthase complex, coupling factor F(o);GO:0015078, hydrogen ion transmembrane transporter activity;GO:0015986, ATP synthesis coupled proton transport;GO:0035786, protein complex oligomerization;GO:0046961, proton-transporting ATPase activity, rotational mechanism	-
TRINITY_DN177420_c0_g1	GO:0003924, GTPase activity;GO:0005525, GTP binding;GO:0005737, cytoplasm;GO:0032153, cell division site;GO:0042802, identical protein binding;GO:0043093, FtsZ-dependent cytokinesis;GO:0051258, protein polymerization;GO:0051301, cell division	-
TRINITY_DN82053_c6_g1	-	-
TRINITY_DN157491_c0_g1	GO:0001556, oocyte maturation;GO:0002468, dendritic cell antigen processing and presentation;GO:0005769, early endosome;GO:0005776, autophagosome;GO:0005813, centrosome;GO:0005814, centriole;GO:0005829, cytosol;GO:0006887, exocytosis;GO:0010507, negative regulation of autophagy;GO:0016197, endosomal transport;GO:0022617, extracellular matrix disassembly;GO:0030335, positive regulation of cell mig…	-
TRINITY_DN126115_c0_g1	-	-
TRINITY_DN118391_c0_g1	GO:0000062, fatty-acyl-CoA binding;GO:0003995, acyl-CoA dehydrogenase activity;GO:0005739, mitochondrion;GO:0009055, electron carrier activity;GO:0016787, hydrolase activity;GO:0033539, fatty acid beta-oxidation using acyl-CoA dehydrogenase;GO:0050660, flavin adenine dinucleotide binding;GO:0052890, oxidoreductase activity, acting on the CH-CH group of donors, with a flavin as acceptor;GO:0055088…	-
TRINITY_DN32918_c0_g1	-	-
TRINITY_DN93744_c4_g5	-	-
TRINITY_DN131217_c0_g1	-	-
TRINITY_DN3668_c0_g1	GO:0005524, ATP binding;GO:0006541, glutamine metabolic process;GO:0009236, cobalamin biosynthetic process;GO:0016874, ligase activity;GO:0042242, cobyrinic acid a,c-diamide synthase activity	-
TRINITY_DN135727_c0_g1	-	-
TRINITY_DN26368_c0_g1	GO:0005178, integrin binding;GO:0005578, proteinaceous extracellular matrix;GO:0005581, collagen trimer;GO:0007155, cell adhesion;GO:0033622, integrin activation;GO:0033627, cell adhesion mediated by integrin;GO:0051894, positive regulation of focal adhesion assembly;GO:0071230, cellular response to amino acid stimulus	-
TRINITY_DN94849_c2_g1	-	-
TRINITY_DN195340_c0_g1	-	-
TRINITY_DN204335_c0_g1	GO:0001678, cellular glucose homeostasis;GO:0004340, glucokinase activity;GO:0004396, hexokinase activity;GO:0005524, ATP binding;GO:0005536, glucose binding;GO:0005623, cell;GO:0005829, cytosol;GO:0006096, glycolytic process;GO:0008865, fructokinase activity;GO:0019158, mannokinase activity;GO:0019318, hexose metabolic process	-
TRINITY_DN218987_c0_g1	-	-
TRINITY_DN174040_c0_g1	-	-
TRINITY_DN194212_c0_g1	-	-
TRINITY_DN92619_c6_g2	-	-
TRINITY_DN93744_c4_g1	-	-
TRINITY_DN84756_c3_g1	GO:0009507, chloroplast;GO:0009522, photosystem I;GO:0009534, chloroplast thylakoid;GO:0009535, chloroplast thylakoid membrane;GO:0009579, thylakoid;GO:0009773, photosynthetic electron transport in photosystem I;GO:0009780, photosynthetic NADP+ reduction;GO:0009941, chloroplast envelope;GO:0015979, photosynthesis;GO:0016021, integral component of membrane;GO:0016168, chlorophyll binding;GO:003009…	K08905-ko00195 Photosynthesis
TRINITY_DN176264_c0_g1	-	-
TRINITY_DN65238_c0_g1	-	-
TRINITY_DN125352_c0_g1	-	-
TRINITY_DN67003_c0_g1	GO:0005618, cell wall;GO:0005886, plasma membrane	-
TRINITY_DN68285_c0_g1	-	-
TRINITY_DN96074_c7_g1	-	-
TRINITY_DN215027_c0_g1	-	-
TRINITY_DN142594_c0_g1	GO:0003677, DNA binding;GO:0006310, DNA recombination;GO:0015074, DNA integration	-
TRINITY_DN138615_c0_g1	-	-
TRINITY_DN74640_c0_g2	-	-
TRINITY_DN75168_c0_g1	GO:0005634, nucleus;GO:0006351, transcription, DNA-templated;GO:0006357, regulation of transcription from RNA polymerase II promoter;GO:0008270, zinc ion binding;GO:0033169, histone H3-K9 demethylation;GO:0033193, Lsd1/2 complex	-
TRINITY_DN132162_c0_g1	-	-
TRINITY_DN74640_c0_g1	-	-
TRINITY_DN136955_c0_g1	-	-
TRINITY_DN83877_c5_g1	-	-
TRINITY_DN214586_c0_g1	-	-
TRINITY_DN117275_c0_g1	GO:0005198, structural molecule activity;GO:0009424, bacterial-type flagellum hook;GO:0044780, bacterial-type flagellum assembly;GO:0071973, bacterial-type flagellum-dependent cell motility	-
TRINITY_DN160646_c0_g1	-	-
TRINITY_DN97287_c2_g6	GO:0003677, DNA binding;GO:0006368, transcription elongation from RNA polymerase II promoter;GO:0016570, histone modification;GO:0016593, Cdc73/Paf1 complex;GO:0040007, growth	-
TRINITY_DN82449_c5_g1	-	-
TRINITY_DN85104_c1_g1	GO:0004108, citrate (Si)-synthase activity;GO:0005739, mitochondrion;GO:0005759, mitochondrial matrix;GO:0006099, tricarboxylic acid cycle;GO:0019629, propionate catabolic process, 2-methylcitrate cycle;GO:0019679, propionate metabolic process, methylcitrate cycle;GO:0045461, sterigmatocystin biosynthetic process;GO:0050440, 2-methylcitrate synthase activity	-
TRINITY_DN126059_c0_g1	-	-
TRINITY_DN163559_c0_g1	GO:0003700, transcription factor activity, sequence-specific DNA binding;GO:0043565, sequence-specific DNA binding	-
TRINITY_DN118045_c0_g1	GO:0003954, NADH dehydrogenase activity;GO:0005747, mitochondrial respiratory chain complex I;GO:0005759, mitochondrial matrix;GO:1901006, ubiquinone-6 biosynthetic process	-
TRINITY_DN70972_c0_g1	-	-
TRINITY_DN143226_c0_g1	GO:0009535, chloroplast thylakoid membrane;GO:0009767, photosynthetic electron transport chain;GO:0016021, integral component of membrane;GO:0016491, oxidoreductase activity;GO:0045156, electron transporter, transferring electrons within the cyclic electron transport pathway of photosynthesis activity;GO:0045158, electron transporter, transferring electrons within cytochrome b6/f complex of photo…	K02637-ko00195 Photosynthesis
TRINITY_DN62373_c0_g1	GO:0004553, hydrolase activity, hydrolyzing O-glycosyl compounds;GO:0005975, carbohydrate metabolic process;GO:0016021, integral component of membrane	-
TRINITY_DN211987_c0_g1	GO:0005509, calcium ion binding	K02183-ko04022 cGMP - PKG signaling pathway;ko04024 cAMP signaling pathway;ko04114 Oocyte meiosis;ko04020 Calcium signaling pathway;ko04070 Phosphatidylinositol signaling system;ko04014 Ras signaling pathway;ko04015 Rap1 signaling pathway
TRINITY_DN123319_c0_g1	-	-
TRINITY_DN52928_c0_g1	-	-
TRINITY_DN76607_c0_g1	-	-
TRINITY_DN95521_c1_g10	GO:0005829, cytosol	-
TRINITY_DN95521_c1_g11	GO:0005524, ATP binding;GO:0016887, ATPase activity	-
TRINITY_DN219494_c0_g1	GO:0003824, catalytic activity;GO:0004467, long-chain fatty acid-CoA ligase activity;GO:0005524, ATP binding;GO:0005737, cytoplasm;GO:0006631, fatty acid metabolic process;GO:0008152, metabolic process;GO:0010009, cytoplasmic side of endosome membrane;GO:0045335, phagocytic vesicle	-
TRINITY_DN93549_c4_g2	-	-
TRINITY_DN57821_c0_g1	GO:0004222, metalloendopeptidase activity;GO:0005524, ATP binding;GO:0005886, plasma membrane;GO:0008270, zinc ion binding;GO:0016021, integral component of membrane;GO:0016887, ATPase activity;GO:0030163, protein catabolic process	-
TRINITY_DN76835_c1_g1	-	-
TRINITY_DN123716_c0_g1	-	-
TRINITY_DN89977_c0_g3	GO:0005634, nucleus;GO:0005737, cytoplasm;GO:0008233, peptidase activity	-
TRINITY_DN89977_c0_g2	-	-
TRINITY_DN89977_c0_g1	GO:0005634, nucleus;GO:0005737, cytoplasm	-
TRINITY_DN110871_c0_g1	-	-
TRINITY_DN96169_c1_g5	-	-
TRINITY_DN127263_c0_g1	-	-
TRINITY_DN94724_c1_g7	GO:0005886, plasma membrane;GO:0009506, plasmodesma;GO:0016021, integral component of membrane	-
TRINITY_DN169098_c0_g1	GO:0005739, mitochondrion;GO:0008270, zinc ion binding;GO:0016491, oxidoreductase activity	-
TRINITY_DN182942_c0_g1	-	-
TRINITY_DN96169_c1_g4	GO:0002181, cytoplasmic translation;GO:0003735, structural constituent of ribosome;GO:0005840, ribosome;GO:0006414, translational elongation;GO:0006417, regulation of translation;GO:0022625, cytosolic large ribosomal subunit;GO:0030295, protein kinase activator activity;GO:0030687, preribosome, large subunit precursor;GO:0045860, positive regulation of protein kinase activity;GO:0070180, large ri…	K02942-ko03010 Ribosome
TRINITY_DN198090_c0_g1	-	-
TRINITY_DN73191_c0_g1	GO:0004864, protein phosphatase inhibitor activity;GO:0005634, nucleus;GO:0005737, cytoplasm;GO:0007059, chromosome segregation;GO:0008047, enzyme activator activity;GO:0009966, regulation of signal transduction;GO:0043666, regulation of phosphoprotein phosphatase activity	-
TRINITY_DN151794_c0_g1	-	-
TRINITY_DN86194_c0_g1	-	-
TRINITY_DN91591_c4_g1	GO:0003723, RNA binding;GO:0005634, nucleus;GO:0005739, mitochondrion;GO:0005759, mitochondrial matrix;GO:0006351, transcription, DNA-templated;GO:0006355, regulation of transcription, DNA-templated;GO:0006417, regulation of translation	-
TRINITY_DN82545_c1_g14	GO:0005737, cytoplasm;GO:0005886, plasma membrane;GO:0016021, integral component of membrane	-
TRINITY_DN93311_c0_g1	GO:0000145, exocyst;GO:0005576, extracellular region;GO:0005618, cell wall;GO:0005829, cytosol;GO:0005856, cytoskeleton;GO:0005886, plasma membrane;GO:0006887, exocytosis;GO:0009524, phragmoplast	-
TRINITY_DN82545_c1_g10	-	-
TRINITY_DN82545_c1_g11	GO:0005886, plasma membrane;GO:0016021, integral component of membrane	-
TRINITY_DN82545_c1_g12	GO:0005886, plasma membrane;GO:0016021, integral component of membrane	-
TRINITY_DN82545_c1_g13	GO:0005886, plasma membrane;GO:0016021, integral component of membrane	-
TRINITY_DN87704_c2_g1	-	-
TRINITY_DN217342_c0_g1	GO:0005057, signal transducer activity, downstream of receptor;GO:0005085, guanyl-nucleotide exchange factor activity;GO:0005089, Rho guanyl-nucleotide exchange factor activity;GO:0005543, phospholipid binding;GO:0005622, intracellular;GO:0005829, cytosol;GO:0005886, plasma membrane;GO:0005911, cell-cell junction;GO:0007160, cell-matrix adhesion;GO:0007264, small GTPase mediated signal transducti…	-
TRINITY_DN184188_c0_g1	GO:0003677, DNA binding;GO:0003729, mRNA binding;GO:0005634, nucleus;GO:0005654, nucleoplasm;GO:0005685, U1 snRNP;GO:0006376, mRNA splice site selection;GO:0008380, RNA splicing;GO:0016607, nuclear speck;GO:0071004, U2-type prespliceosome	-
TRINITY_DN88847_c2_g6	GO:0003824, catalytic activity;GO:0009408, response to heat;GO:0010286, heat acclimation;GO:0010608, posttranscriptional regulation of gene expression	-
TRINITY_DN42733_c0_g1	-	-
TRINITY_DN88847_c2_g4	GO:0005739, mitochondrion;GO:0008289, lipid binding;GO:0016021, integral component of membrane;GO:1903955, positive regulation of protein targeting to mitochondrion	-
TRINITY_DN88847_c2_g5	GO:0005524, ATP binding;GO:0005886, plasma membrane;GO:0008559, xenobiotic-transporting ATPase activity;GO:0016021, integral component of membrane;GO:0035690, cellular response to drug;GO:0042626, ATPase activity, coupled to transmembrane movement of substances;GO:0046618, drug export;GO:0046677, response to antibiotic;GO:0055085, transmembrane transport	-
TRINITY_DN88847_c2_g2	-	-
TRINITY_DN88847_c2_g3	GO:0005524, ATP binding;GO:0005886, plasma membrane;GO:0008559, xenobiotic-transporting ATPase activity;GO:0016021, integral component of membrane;GO:0030003, cellular cation homeostasis;GO:0035376, sterol import;GO:0035690, cellular response to drug;GO:0042493, response to drug;GO:0042626, ATPase activity, coupled to transmembrane movement of substances;GO:0046618, drug export	-
TRINITY_DN88847_c2_g1	GO:0003824, catalytic activity;GO:0009408, response to heat;GO:0010286, heat acclimation;GO:0010608, posttranscriptional regulation of gene expression	-
TRINITY_DN188048_c0_g1	-	-
TRINITY_DN173740_c0_g1	GO:0005524, ATP binding;GO:0005737, cytoplasm;GO:0006457, protein folding;GO:0006950, response to stress	-
TRINITY_DN78525_c0_g1	GO:0000494, box C/D snoRNA 3'-end processing;GO:0003723, RNA binding;GO:0005840, ribosome;GO:0006356, regulation of transcription from RNA polymerase I promoter;GO:0008033, tRNA processing;GO:0008649, rRNA methyltransferase activity;GO:0015030, Cajal body;GO:0030686, 90S preribosome;GO:0031167, rRNA methylation;GO:0031428, box C/D snoRNP complex;GO:0032040, small-subunit processome;GO:1990258, hi…	-
TRINITY_DN176182_c0_g1	GO:0008802, betaine-aldehyde dehydrogenase activity;GO:0008812, choline dehydrogenase activity;GO:0016614, oxidoreductase activity, acting on CH-OH group of donors;GO:0019285, glycine betaine biosynthetic process from choline;GO:0050660, flavin adenine dinucleotide binding	-
TRINITY_DN218588_c0_g1	-	-
TRINITY_DN177494_c0_g1	GO:0004820, glycine-tRNA ligase activity;GO:0005524, ATP binding;GO:0005737, cytoplasm;GO:0005739, mitochondrion;GO:0005768, endosome;GO:0005794, Golgi apparatus;GO:0005802, trans-Golgi network;GO:0005829, cytosol;GO:0006426, glycyl-tRNA aminoacylation;GO:0015966, diadenosine tetraphosphate biosynthetic process;GO:0046686, response to cadmium ion;GO:0046983, protein dimerization activity	-
TRINITY_DN185244_c0_g1	-	-
TRINITY_DN210833_c0_g1	-	-
TRINITY_DN34443_c0_g1	GO:0016787, hydrolase activity	-
TRINITY_DN68393_c0_g1	-	-
TRINITY_DN59673_c0_g1	-	-
TRINITY_DN88611_c1_g1	GO:0000139, Golgi membrane;GO:0005768, endosome;GO:0005794, Golgi apparatus;GO:0005802, trans-Golgi network;GO:0005886, plasma membrane;GO:0008460, dTDP-glucose 4,6-dehydratase activity;GO:0016020, membrane;GO:0016021, integral component of membrane;GO:0019305, dTDP-rhamnose biosynthetic process;GO:0032580, Golgi cisterna membrane;GO:0033320, UDP-D-xylose biosynthetic process;GO:0042732, D-xylose…	K08678-ko00500 Starch and sucrose metabolism;ko00520 Amino sugar and nucleotide sugar metabolism
TRINITY_DN88611_c1_g2	-	-
TRINITY_DN88611_c1_g3	-	-
TRINITY_DN105971_c0_g1	GO:0005524, ATP binding;GO:0005886, plasma membrane;GO:0006457, protein folding;GO:0009408, response to heat;GO:0046872, metal ion binding	-
TRINITY_DN142894_c0_g1	-	-
TRINITY_DN61543_c0_g1	-	-
TRINITY_DN108649_c0_g1	GO:0005524, ATP binding;GO:0019538, protein metabolic process	-
TRINITY_DN113707_c0_g1	-	-
TRINITY_DN79170_c0_g2	-	-
TRINITY_DN79170_c0_g1	GO:0005634, nucleus;GO:0005829, cytosol;GO:0030433, ubiquitin-dependent ERAD pathway;GO:0031593, polyubiquitin binding;GO:0042177, negative regulation of protein catabolic process	-
TRINITY_DN83833_c0_g5	GO:0005622, intracellular;GO:0035556, intracellular signal transduction;GO:0046872, metal ion binding;GO:0047134, protein-disulfide reductase activity	-
TRINITY_DN156572_c0_g1	-	-
TRINITY_DN47627_c0_g1	GO:0003824, catalytic activity;GO:0004760, serine-pyruvate transaminase activity;GO:0005739, mitochondrion;GO:0005759, mitochondrial matrix;GO:0005777, peroxisome;GO:0005782, peroxisomal matrix;GO:0007219, Notch signaling pathway;GO:0008453, alanine-glyoxylate transaminase activity;GO:0009436, glyoxylate catabolic process;GO:0010498, proteasomal protein catabolic process;GO:0016597, amino acid bi…	-
TRINITY_DN101281_c0_g1	-	-
TRINITY_DN45028_c0_g1	-	-
TRINITY_DN132450_c0_g1	-	-
TRINITY_DN207444_c0_g1	GO:0003995, acyl-CoA dehydrogenase activity;GO:0050660, flavin adenine dinucleotide binding;GO:0052890, oxidoreductase activity, acting on the CH-CH group of donors, with a flavin as acceptor	-
TRINITY_DN138820_c0_g1	GO:0004674, protein serine/threonine kinase activity;GO:0004683, calmodulin-dependent protein kinase activity;GO:0005524, ATP binding	-
TRINITY_DN100147_c0_g1	-	-
TRINITY_DN58806_c0_g1	GO:0006081, cellular aldehyde metabolic process;GO:0018456, aryl-alcohol dehydrogenase (NAD+) activity	-
TRINITY_DN153044_c0_g1	GO:0000155, phosphorelay sensor kinase activity;GO:0005524, ATP binding;GO:0005737, cytoplasm;GO:0006935, chemotaxis	-
TRINITY_DN114998_c0_g1	-	-
TRINITY_DN139699_c0_g1	GO:0000139, Golgi membrane;GO:0005525, GTP binding;GO:0005783, endoplasmic reticulum;GO:0005789, endoplasmic reticulum membrane;GO:0005794, Golgi apparatus;GO:0006886, intracellular protein transport;GO:0006888, ER to Golgi vesicle-mediated transport;GO:0006998, nuclear envelope organization;GO:0012507, ER to Golgi transport vesicle membrane;GO:0016192, vesicle-mediated transport;GO:0016787, hydr…	-
TRINITY_DN166980_c0_g1	GO:0005777, peroxisome;GO:0006091, generation of precursor metabolites and energy;GO:0006631, fatty acid metabolic process;GO:0006635, fatty acid beta-oxidation;GO:0006810, transport;GO:0008458, carnitine O-octanoyltransferase activity;GO:0009437, carnitine metabolic process;GO:0015936, coenzyme A metabolic process;GO:0016746, transferase activity, transferring acyl groups;GO:0051791, medium-chai…	-
TRINITY_DN147281_c0_g1	-	-
TRINITY_DN183928_c0_g1	-	-
TRINITY_DN206494_c0_g1	GO:0003735, structural constituent of ribosome;GO:0005739, mitochondrion;GO:0005761, mitochondrial ribosome;GO:0005840, ribosome;GO:0006412, translation	-
TRINITY_DN217958_c0_g1	-	-
TRINITY_DN201747_c0_g1	-	-
TRINITY_DN142599_c0_g1	-	-
TRINITY_DN63029_c1_g1	-	-
TRINITY_DN200718_c0_g1	GO:0005351, sugar:proton symporter activity;GO:0005355, glucose transmembrane transporter activity;GO:0005887, integral component of plasma membrane;GO:0035428, hexose transmembrane transport;GO:0046323, glucose import	-
TRINITY_DN116289_c0_g1	-	-
TRINITY_DN163055_c0_g1	GO:0003677, DNA binding;GO:0004519, endonuclease activity;GO:0009307, DNA restriction-modification system;GO:0016021, integral component of membrane	-
TRINITY_DN88416_c0_g6	GO:0005524, ATP binding	-
TRINITY_DN88416_c0_g7	GO:0005524, ATP binding	-
TRINITY_DN88416_c0_g4	GO:0005524, ATP binding;GO:0005730, nucleolus;GO:0005739, mitochondrion;GO:0006457, protein folding;GO:0030097, hemopoiesis	-
TRINITY_DN88416_c0_g5	-	-
TRINITY_DN88416_c0_g2	-	-
TRINITY_DN13685_c0_g1	GO:0000049, tRNA binding;GO:0003723, RNA binding;GO:0003735, structural constituent of ribosome;GO:0006412, translation;GO:0006417, regulation of translation;GO:0015934, large ribosomal subunit;GO:0019843, rRNA binding	-
TRINITY_DN88416_c0_g1	GO:0005524, ATP binding	-
TRINITY_DN102893_c0_g1	GO:0008152, metabolic process;GO:0016787, hydrolase activity	-
TRINITY_DN84226_c0_g1	-	-
TRINITY_DN89702_c2_g1	GO:0008270, zinc ion binding;GO:0009793, embryo development ending in seed dormancy;GO:0016021, integral component of membrane;GO:0016874, ligase activity;GO:0043161, proteasome-mediated ubiquitin-dependent protein catabolic process;GO:0061630, ubiquitin protein ligase activity	-
TRINITY_DN7213_c0_g1	GO:0000346, transcription export complex;GO:0000398, mRNA splicing, via spliceosome;GO:0000781, chromosome, telomeric region;GO:0003676, nucleic acid binding;GO:0003723, RNA binding;GO:0004004, ATP-dependent RNA helicase activity;GO:0005524, ATP binding;GO:0005681, spliceosomal complex;GO:0006283, transcription-coupled nucleotide-excision repair;GO:0006348, chromatin silencing at telomere;GO:0006…	-
TRINITY_DN115212_c0_g1	-	-
TRINITY_DN156223_c0_g1	GO:0000104, succinate dehydrogenase activity;GO:0005739, mitochondrion;GO:0005749, mitochondrial respiratory chain complex II, succinate dehydrogenase complex (ubiquinone);GO:0006099, tricarboxylic acid cycle;GO:0006105, succinate metabolic process;GO:0006121, mitochondrial electron transport, succinate to ubiquinone;GO:0008177, succinate dehydrogenase (ubiquinone) activity;GO:0009055, electron c…	-
TRINITY_DN28445_c0_g1	GO:0016491, oxidoreductase activity;GO:0071949, FAD binding	-
TRINITY_DN207476_c0_g1	GO:0003677, DNA binding;GO:0003700, transcription factor activity, sequence-specific DNA binding;GO:0006351, transcription, DNA-templated	-
TRINITY_DN85740_c2_g1	GO:0003857, 3-hydroxyacyl-CoA dehydrogenase activity;GO:0006631, fatty acid metabolic process;GO:0008691, 3-hydroxybutyryl-CoA dehydrogenase activity;GO:0019605, butyrate metabolic process;GO:0070403, NAD+ binding	K00074-ko00360 Phenylalanine metabolism;ko00650 Butanoate metabolism;ko00362 Benzoate degradation
TRINITY_DN85740_c2_g3	-	-
TRINITY_DN85740_c2_g2	-	-
TRINITY_DN85740_c2_g5	GO:0003857, 3-hydroxyacyl-CoA dehydrogenase activity;GO:0008691, 3-hydroxybutyryl-CoA dehydrogenase activity;GO:0019605, butyrate metabolic process;GO:0070403, NAD+ binding	K00074-ko00360 Phenylalanine metabolism;ko00650 Butanoate metabolism;ko00362 Benzoate degradation
TRINITY_DN42254_c0_g1	GO:0005634, nucleus;GO:0005635, nuclear envelope;GO:0005737, cytoplasm;GO:0006378, mRNA polyadenylation;GO:0008143, poly(A) binding;GO:0016973, poly(A)+ mRNA export from nucleus;GO:0036002, pre-mRNA binding;GO:0043144, snoRNA processing;GO:0043488, regulation of mRNA stability;GO:0046872, metal ion binding;GO:1900364, negative regulation of mRNA polyadenylation;GO:1902373, negative regulation of …	-
TRINITY_DN157910_c0_g1	-	-
TRINITY_DN220521_c0_g1	-	-
TRINITY_DN17005_c0_g1	GO:0000079, regulation of cyclin-dependent protein serine/threonine kinase activity;GO:0000086, G2/M transition of mitotic cell cycle;GO:0000320, re-entry into mitotic cell cycle;GO:0004674, protein serine/threonine kinase activity;GO:0004712, protein serine/threonine/tyrosine kinase activity;GO:0004713, protein tyrosine kinase activity;GO:0004715, non-membrane spanning protein tyrosine kinase ac…	-
TRINITY_DN118678_c0_g1	-	-
TRINITY_DN101593_c0_g1	-	-
TRINITY_DN214746_c0_g1	-	-
TRINITY_DN129454_c0_g1	-	-
TRINITY_DN46158_c0_g1	GO:0004767, sphingomyelin phosphodiesterase activity;GO:0005576, extracellular region;GO:0006685, sphingomyelin catabolic process;GO:0016798, hydrolase activity, acting on glycosyl bonds;GO:0046513, ceramide biosynthetic process;GO:0046872, metal ion binding	-
TRINITY_DN86033_c1_g4	-	-
TRINITY_DN86033_c1_g5	-	-
TRINITY_DN86033_c1_g6	GO:0015095, magnesium ion transmembrane transporter activity;GO:0015693, magnesium ion transport;GO:0016021, integral component of membrane	-
TRINITY_DN86033_c1_g7	GO:0005634, nucleus;GO:0007275, multicellular organism development;GO:0046872, metal ion binding	-
TRINITY_DN86033_c1_g1	-	-
TRINITY_DN86033_c1_g2	-	-
TRINITY_DN86033_c1_g3	-	-
TRINITY_DN26798_c0_g1	GO:0016021, integral component of membrane	-
TRINITY_DN198875_c0_g1	-	-
TRINITY_DN86408_c0_g1	-	-
TRINITY_DN65104_c0_g2	GO:0000166, nucleotide binding;GO:0003723, RNA binding;GO:0008270, zinc ion binding	-
TRINITY_DN65104_c0_g1	-	-
TRINITY_DN87841_c0_g2	-	-
TRINITY_DN204068_c0_g1	-	-
TRINITY_DN125574_c0_g1	-	-
TRINITY_DN70361_c0_g1	GO:0006397, mRNA processing;GO:0008270, zinc ion binding;GO:0009507, chloroplast	-
TRINITY_DN70361_c0_g2	GO:0006397, mRNA processing;GO:0008270, zinc ion binding;GO:0009507, chloroplast	-
TRINITY_DN85162_c0_g1	GO:0005506, iron ion binding;GO:0005789, endoplasmic reticulum membrane;GO:0006633, fatty acid biosynthetic process;GO:0016021, integral component of membrane;GO:0016126, sterol biosynthetic process;GO:0016491, oxidoreductase activity	K00227-ko00100 Steroid biosynthesis
TRINITY_DN85368_c1_g3	-	-
TRINITY_DN85162_c0_g3	-	-
TRINITY_DN85162_c0_g2	GO:0005506, iron ion binding;GO:0005789, endoplasmic reticulum membrane;GO:0006633, fatty acid biosynthetic process;GO:0016021, integral component of membrane;GO:0016126, sterol biosynthetic process;GO:0016491, oxidoreductase activity	-
TRINITY_DN85368_c1_g6	-	-
TRINITY_DN210581_c0_g1	GO:0016021, integral component of membrane	-
TRINITY_DN85368_c1_g4	-	-
TRINITY_DN85368_c1_g5	-	-
TRINITY_DN171697_c0_g1	GO:0016021, integral component of membrane;GO:0072546, ER membrane protein complex	-
TRINITY_DN192414_c0_g1	-	-
TRINITY_DN60203_c0_g1	-	-
TRINITY_DN109018_c0_g1	-	-
TRINITY_DN142448_c0_g1	GO:0000147, actin cortical patch assembly;GO:0005546, phosphatidylinositol-4,5-bisphosphate binding;GO:0005794, Golgi apparatus;GO:0005829, cytosol;GO:0006895, Golgi to endosome transport;GO:0006897, endocytosis;GO:0007015, actin filament organization;GO:0030125, clathrin vesicle coat;GO:0030479, actin cortical patch	-
TRINITY_DN170195_c0_g1	GO:0004357, glutamate-cysteine ligase activity;GO:0005524, ATP binding;GO:0042398, cellular modified amino acid biosynthetic process	-
TRINITY_DN96773_c0_g10	-	-
TRINITY_DN78760_c0_g2	GO:0005509, calcium ion binding;GO:0009535, chloroplast thylakoid membrane;GO:0009654, photosystem II oxygen evolving complex;GO:0015979, photosynthesis;GO:0016021, integral component of membrane;GO:0019898, extrinsic component of membrane;GO:0042549, photosystem II stabilization	-
TRINITY_DN196222_c0_g1	-	-
TRINITY_DN74688_c0_g1	-	-
TRINITY_DN37614_c0_g1	-	-
TRINITY_DN46983_c0_g1	-	-
TRINITY_DN118116_c0_g1	GO:0005576, extracellular region;GO:0005615, extracellular space;GO:0005768, endosome;GO:0005769, early endosome;GO:0005770, late endosome;GO:0005905, clathrin-coated pit;GO:0006826, iron ion transport;GO:0006879, cellular iron ion homeostasis;GO:0007015, actin filament organization;GO:0007257, activation of JUN kinase activity;GO:0008198, ferrous iron binding;GO:0008199, ferric iron binding;GO:0…	-
TRINITY_DN79149_c0_g1	GO:0009793, embryo development ending in seed dormancy;GO:0009845, seed germination;GO:0010029, regulation of seed germination;GO:0098755, maintenance of seed dormancy by absisic acid	-
TRINITY_DN141406_c0_g1	GO:0000302, response to reactive oxygen species;GO:0004028, 3-chloroallyl aldehyde dehydrogenase activity;GO:0004029, aldehyde dehydrogenase (NAD) activity;GO:0004030, aldehyde dehydrogenase [NAD(P)+] activity;GO:0005634, nucleus;GO:0005739, mitochondrion;GO:0005743, mitochondrial inner membrane;GO:0005777, peroxisome;GO:0005783, endoplasmic reticulum;GO:0005829, cytosol;GO:0006081, cellular alde…	-
TRINITY_DN138119_c0_g1	-	-
TRINITY_DN193333_c0_g1	GO:0016021, integral component of membrane	-
TRINITY_DN53576_c0_g1	-	-
TRINITY_DN197048_c0_g1	GO:0007007, inner mitochondrial membrane organization;GO:0031305, integral component of mitochondrial inner membrane	-
TRINITY_DN79258_c0_g1	GO:0004553, hydrolase activity, hydrolyzing O-glycosyl compounds;GO:0005576, extracellular region;GO:0005975, carbohydrate metabolic process;GO:0016985, mannan endo-1,4-beta-mannosidase activity;GO:0046355, mannan catabolic process	-
TRINITY_DN60251_c0_g1	GO:0016021, integral component of membrane	-
TRINITY_DN81845_c2_g11	-	-
TRINITY_DN81845_c2_g10	-	-
TRINITY_DN90789_c0_g4	-	-
TRINITY_DN90789_c0_g5	-	-
TRINITY_DN90789_c0_g6	GO:0003676, nucleic acid binding;GO:0005739, mitochondrion;GO:0015074, DNA integration	-
TRINITY_DN90789_c0_g7	GO:0003676, nucleic acid binding;GO:0005739, mitochondrion;GO:0015074, DNA integration	-
TRINITY_DN90789_c0_g1	GO:0009414, response to water deprivation;GO:0010375, stomatal complex patterning;GO:0010497, plasmodesmata-mediated intercellular transport;GO:0015630, microtubule cytoskeleton;GO:0043622, cortical microtubule organization;GO:0051607, defense response to virus	-
TRINITY_DN90789_c0_g2	GO:0005739, mitochondrion	-
TRINITY_DN90789_c0_g3	-	-
TRINITY_DN90789_c0_g8	GO:0003676, nucleic acid binding;GO:0005739, mitochondrion;GO:0015074, DNA integration	-
TRINITY_DN217249_c0_g1	GO:0004499, N,N-dimethylaniline monooxygenase activity;GO:0050660, flavin adenine dinucleotide binding;GO:0050661, NADP binding	-
TRINITY_DN109690_c0_g1	GO:0000045, autophagosome assembly;GO:0000421, autophagosome membrane;GO:0005622, intracellular;GO:0005739, mitochondrion;GO:0005776, autophagosome;GO:0005829, cytosol;GO:0005874, microtubule;GO:0005930, axoneme;GO:0006914, autophagy;GO:0006995, cellular response to nitrogen starvation;GO:0008017, microtubule binding;GO:0012505, endomembrane system;GO:0016236, macroautophagy;GO:0031090, organelle…	-
TRINITY_DN84250_c0_g8	-	-
TRINITY_DN16950_c0_g1	GO:0016787, hydrolase activity	-
TRINITY_DN12307_c0_g1	-	-
TRINITY_DN12307_c0_g2	-	-
TRINITY_DN196246_c0_g1	-	-
TRINITY_DN84250_c0_g2	-	-
TRINITY_DN84250_c0_g3	-	-
TRINITY_DN67828_c0_g1	GO:0005375, copper ion transmembrane transporter activity;GO:0005770, late endosome;GO:0005773, vacuole;GO:0005774, vacuolar membrane;GO:0005794, Golgi apparatus;GO:0009506, plasmodesma;GO:0009737, response to abscisic acid;GO:0015680, intracellular copper ion transport;GO:0016021, integral component of membrane	-
TRINITY_DN84250_c0_g6	-	-
TRINITY_DN84250_c0_g7	-	-
TRINITY_DN84250_c0_g4	-	-
TRINITY_DN84250_c0_g5	-	-
TRINITY_DN63420_c0_g1	GO:0000042, protein targeting to Golgi;GO:0003924, GTPase activity;GO:0005525, GTP binding;GO:0005622, intracellular;GO:0005794, Golgi apparatus;GO:0005802, trans-Golgi network;GO:0005829, cytosol;GO:0006623, protein targeting to vacuole;GO:0006897, endocytosis;GO:0007264, small GTPase mediated signal transduction;GO:0016192, vesicle-mediated transport;GO:0034976, response to endoplasmic reticulu…	-
TRINITY_DN78930_c0_g1	GO:0009507, chloroplast;GO:0009517, PSII associated light-harvesting complex II;GO:0009522, photosystem I;GO:0009534, chloroplast thylakoid;GO:0009535, chloroplast thylakoid membrane;GO:0009579, thylakoid;GO:0009637, response to blue light;GO:0009765, photosynthesis, light harvesting;GO:0009768, photosynthesis, light harvesting in photosystem I;GO:0009783, photosystem II antenna complex;GO:000994…	-
TRINITY_DN78930_c0_g2	GO:0009507, chloroplast;GO:0009517, PSII associated light-harvesting complex II;GO:0009522, photosystem I;GO:0009534, chloroplast thylakoid;GO:0009535, chloroplast thylakoid membrane;GO:0009579, thylakoid;GO:0009637, response to blue light;GO:0009765, photosynthesis, light harvesting;GO:0009768, photosynthesis, light harvesting in photosystem I;GO:0009783, photosystem II antenna complex;GO:000994…	-
TRINITY_DN100256_c0_g1	-	-
TRINITY_DN89465_c1_g4	-	-
TRINITY_DN41876_c0_g1	-	-
TRINITY_DN148685_c0_g1	-	-
TRINITY_DN156809_c0_g1	GO:0005737, cytoplasm;GO:0070043, rRNA (guanine-N7-)-methyltransferase activity	-
TRINITY_DN89465_c1_g1	-	-
TRINITY_DN89465_c1_g2	-	-
TRINITY_DN89465_c1_g3	-	-
TRINITY_DN110771_c0_g1	-	-
TRINITY_DN212373_c0_g1	-	-
TRINITY_DN164919_c0_g1	GO:0005886, plasma membrane;GO:0006810, transport;GO:0016021, integral component of membrane	-
TRINITY_DN66356_c0_g1	GO:0005737, cytoplasm;GO:0007399, nervous system development;GO:0007409, axonogenesis;GO:0019221, cytokine-mediated signaling pathway;GO:0019538, protein metabolic process;GO:0021670, lateral ventricle development;GO:0021849, neuroblast division in subventricular zone;GO:0034332, adherens junction organization;GO:0050769, positive regulation of neurogenesis;GO:0050775, positive regulation of dend…	-
TRINITY_DN79250_c1_g1	-	-
TRINITY_DN67671_c0_g1	-	-
TRINITY_DN144176_c0_g1	GO:0004022, alcohol dehydrogenase (NAD) activity;GO:0006066, alcohol metabolic process;GO:0008774, acetaldehyde dehydrogenase (acetylating) activity;GO:0015976, carbon utilization;GO:0046872, metal ion binding	-
TRINITY_DN108190_c0_g1	GO:0003964, RNA-directed DNA polymerase activity;GO:0006310, DNA recombination;GO:0009036, Type II site-specific deoxyribonuclease activity;GO:0032197, transposition, RNA-mediated;GO:0032199, reverse transcription involved in RNA-mediated transposition;GO:0046872, metal ion binding;GO:0090305, nucleic acid phosphodiester bond hydrolysis	-
TRINITY_DN200501_c0_g1	-	-
TRINITY_DN31406_c0_g1	-	-
TRINITY_DN74783_c0_g1	GO:0000162, tryptophan biosynthetic process;GO:0004049, anthranilate synthase activity;GO:0009507, chloroplast;GO:0010600, regulation of auxin biosynthetic process;GO:0046872, metal ion binding	-
TRINITY_DN90253_c2_g1	-	-
TRINITY_DN10382_c0_g1	GO:0000155, phosphorelay sensor kinase activity;GO:0005524, ATP binding;GO:0005622, intracellular;GO:0016021, integral component of membrane	-
TRINITY_DN80186_c0_g2	GO:0005886, plasma membrane	-
TRINITY_DN172232_c0_g1	GO:0016787, hydrolase activity;GO:0046872, metal ion binding;GO:0102009, proline dipeptidase activity	-
TRINITY_DN131923_c0_g1	-	-
TRINITY_DN136336_c0_g1	GO:0004076, biotin synthase activity;GO:0005506, iron ion binding;GO:0009102, biotin biosynthetic process;GO:0051537, 2 iron, 2 sulfur cluster binding;GO:0051539, 4 iron, 4 sulfur cluster binding	-
TRINITY_DN63015_c0_g1	-	-
TRINITY_DN206587_c0_g1	-	-
TRINITY_DN144693_c0_g1	-	-
TRINITY_DN147604_c0_g1	GO:0008270, zinc ion binding;GO:0016021, integral component of membrane;GO:0016491, oxidoreductase activity	-
TRINITY_DN84331_c4_g1	-	-
TRINITY_DN59865_c0_g1	GO:0005086, ARF guanyl-nucleotide exchange factor activity;GO:0005794, Golgi apparatus;GO:0005798, Golgi-associated vesicle;GO:0006886, intracellular protein transport;GO:0006888, ER to Golgi vesicle-mediated transport;GO:0032012, regulation of ARF protein signal transduction	-
TRINITY_DN97670_c2_g1	GO:0016021, integral component of membrane	-
TRINITY_DN81936_c3_g3	-	-
TRINITY_DN81936_c3_g2	-	-
TRINITY_DN81936_c3_g1	-	-
TRINITY_DN96649_c1_g3	GO:0003677, DNA binding;GO:0005634, nucleus;GO:0006351, transcription, DNA-templated;GO:0006355, regulation of transcription, DNA-templated;GO:0008270, zinc ion binding;GO:0032454, histone demethylase activity (H3-K9 specific);GO:0046872, metal ion binding;GO:0051213, dioxygenase activity;GO:0060969, negative regulation of gene silencing	-
TRINITY_DN96649_c1_g4	-	-
TRINITY_DN96649_c1_g5	GO:0003964, RNA-directed DNA polymerase activity;GO:0004519, endonuclease activity;GO:0005739, mitochondrion;GO:0006314, intron homing;GO:0006397, mRNA processing	-
TRINITY_DN81936_c3_g5	GO:0000118, histone deacetylase complex;GO:0000122, negative regulation of transcription from RNA polymerase II promoter;GO:0000785, chromatin;GO:0001106, RNA polymerase II transcription corepressor activity;GO:0005634, nucleus;GO:0006351, transcription, DNA-templated;GO:0006355, regulation of transcription, DNA-templated;GO:0016575, histone deacetylation;GO:0045892, negative regulation of transc…	-
TRINITY_DN81936_c3_g4	GO:0004414, homoserine O-acetyltransferase activity;GO:0005737, cytoplasm;GO:0006555, methionine metabolic process;GO:0009086, methionine biosynthetic process;GO:0009092, homoserine metabolic process	-
TRINITY_DN96649_c1_g8	GO:0003676, nucleic acid binding;GO:0005739, mitochondrion;GO:0008270, zinc ion binding	-
TRINITY_DN96649_c1_g9	GO:0003677, DNA binding;GO:0005634, nucleus;GO:0006351, transcription, DNA-templated;GO:0006355, regulation of transcription, DNA-templated;GO:0008270, zinc ion binding;GO:0032454, histone demethylase activity (H3-K9 specific);GO:0046872, metal ion binding;GO:0051213, dioxygenase activity;GO:0060969, negative regulation of gene silencing	-
TRINITY_DN208133_c0_g1	GO:0004252, serine-type endopeptidase activity;GO:0005618, cell wall;GO:0005783, endoplasmic reticulum;GO:0005886, plasma membrane;GO:0010074, maintenance of meristem identity;GO:0040008, regulation of growth	-
TRINITY_DN218022_c0_g1	-	-
TRINITY_DN13060_c0_g1	GO:0008270, zinc ion binding;GO:0016491, oxidoreductase activity;GO:0043957, acryloyl-CoA reductase (NADP+) activity;GO:0043958, acryloyl-CoA reductase activity	-
[truncated: 294,601+ more rows]
