# Supplementary material for: Amino acids profiling and transcriptomic data integration demonstrates the dynamic regulation of amino acids synthesis in the leaves of Cyclocarya paliurus
Source: PeerJ. 2022 Jul 5;10:e13689. doi: 10.7717/peerj.13689 (PMC9266588; doi:10.7717/peerj.13689)
Supplement: Supplemental Information 12 [file peerj-10-13689-s012.xls]

## Sheet: DEGs
Table S6 DEGs involved in the amino acid biosynthesis pathway
Gene id	Function	S1-1	S1-2	S1-3	S2-1	S2-2	S2-3	S3-1	S3-2	S3-3
TRINITY_DN76877_c1_g1	scs; succinyl-CoA synthetase alpha subunit [EC:6.2.1.4 6.2.1.5]	3.44427	0.349995	13.9391	0.032806	0.11379	0.0463792	0	0.168127	0
TRINITY_DN78974_c0_g1	trpE; anthranilate synthase component I [EC:4.1.3.27]	0.688175	2.87191	1.99532	16.1934	6.37228	9.26039	1.27095	0.0804606	0
TRINITY_DN81021_c4_g6	pgm; phosphoglucomutase [EC:5.4.2.2]	4.32478	2.18413	8.5691	0.482982	0.297651	0.184095	0	0.21901	0
TRINITY_DN81124_c1_g3	tal; transaldolase [EC:2.2.1.2]	6.19163	3.24082	23.962	1.10727	0.702059	0.180214	0	4.16881	0
TRINITY_DN82092_c1_g3	fba; fructose-bisphosphate aldolase, class I [EC:4.1.2.13]	0.433825	0.418939	3.16306	10.0438	14.2239	522.437	331.295	548.199	75.8534
TRINITY_DN82374_c3_g2	tkt; transketolase [EC:2.2.1.1]	2.55866	2.03404	11.9632	2.70526	0.171989	0.0876018	0	1.22327	0
TRINITY_DN83323_c1_g1	pgd; 6-phosphogluconate dehydrogenase [EC:1.1.1.44 1.1.1.343]	11.8693	2.14471	30.2181	1.52306	0.137012	0.26793	0	1.36483	0
TRINITY_DN84761_c0_g1	rpiA; ribose 5-phosphate isomerase A [EC:5.3.1.6]	4.65607	1.78655	1.16674	5.38158	5.37996	15.6392	12.378	18.4704	12.6839
TRINITY_DN86024_c4_g3	gapdh; glyceraldehyde 3-phosphate dehydrogenase [EC:1.2.1.12]	104.173	144.963	50.7436	61.8601	74.3016	11.7074	16.3454	5.82981	7.57865
TRINITY_DN86156_c1_g1	fba; fructose-bisphosphate aldolase, class I [EC:4.1.2.13]	24.4158	16.4682	85.6213	118.643	133.643	1546.23	3676.1	5486.89	6966.16
TRINITY_DN86203_c1_g1	rpiA; ribose 5-phosphate isomerase A [EC:5.3.1.6]	1.8108	1.02116	1.04273	1.2162	4.46632	3.03423	9.8269	7.53775	10.4054
TRINITY_DN87678_c2_g2	gs; glutamine synthetase [EC:6.3.1.2]	16.0684	10.0848	16.4569	17.7211	61.3337	170.129	373.556	194.631	90.4062
TRINITY_DN87922_c2_g2	eno; enolase [EC:4.2.1.11]	41.9063	60.0699	37.5216	45.2553	32.3106	15.1832	6.04495	2.35855	2.59768
TRINITY_DN88021_c2_g2	gapdh; glyceraldehyde 3-phosphate dehydrogenase [EC:1.2.1.12]	9.14389	4.28768	33.1181	5.60565	0.766584	0.822943	0.0536744	1.0131	0
TRINITY_DN88919_c2_g3	pgk; phosphoglycerate kinase [EC:2.7.2.3]	27.6776	20.1406	33.4482	29.416	71.7375	84.6797	296.417	254.195	68.4347
TRINITY_DN89809_c2_g1	gapdh; glyceraldehyde-3-phosphate dehydrogenase (NADP+) [EC:1.2.1.9]	675.877	891.955	61.1171	59.885	478.332	3.01418	41.6444	7.3064	17.0536
TRINITY_DN91272_c4_g3	pdh; pyruvate dehydrogenase E2 component (dihydrolipoamide acetyltransferase) [EC:2.3.1.12]	96.8331	85.5776	7.22734	9.09337	35.0641	1.76512	3.59712	1.76565	5.93778
TRINITY_DN91445_c1_g1	cs; citrate synthase [EC:2.3.3.1]	428.078	475.537	121.501	63.4834	184.325	7.04164	5.5393	4.5014	6.74505
TRINITY_DN91569_c1_g4	glyA; glycine hydroxymethyltransferase [EC:2.1.2.1]	5.35525	1.92438	4.35137	4.9869	12.0284	43.213	339.311	739.212	106.667
TRINITY_DN93212_c0_g1	ast; aspartate aminotransferase, cytoplasmic [EC:2.6.1.1]	170.649	205.906	190.748	207.126	149.882	49.3819	26.7913	9.77744	5.39113
TRINITY_DN93648_c0_g1	pfkA; 6-phosphofructokinase 1 [EC:2.7.1.11]	43.7826	51.2193	22.6314	43.4003	38.7362	3.57174	4.52794	0.949982	2.95731
TRINITY_DN93919_c0_g1	ltaE; threonine aldolase [EC:4.1.2.48]	2.83636	4.35628	5.67495	2.28949	3.13954	6.99905	12.4557	26.7923	23.3708
TRINITY_DN94634_c1_g2	pdh; pyruvate dehydrogenase E2 component (dihydrolipoamide acetyltransferase) [EC:2.3.1.12]	221.846	268.029	61.2675	79.7998	139.484	14.2275	21.0486	6.93695	7.94495
TRINITY_DN94653_c2_g1	icd; isocitrate dehydrogenase [EC:1.1.1.42]	217.525	230.999	15.2448	11.6736	98.9712	3.53588	6.00446	0.892604	6.5872
TRINITY_DN95151_c1_g2	hsd; homoserine dehydrogenase 1 [EC: 1.1.1.3]	14.9609	6.97115	10.6897	23.6132	24.3651	26.8116	2.11687	2.06129	0.198389
TRINITY_DN95178_c1_g1	pdh; pyruvate dehydrogenase E1 component beta subunit [EC:1.2.4.1]	338.499	375.694	160.694	138.299	114.434	21.2687	26.4518	9.53139	8.92758
TRINITY_DN96899_c2_g2	gapdh; glyceraldehyde-3-phosphate dehydrogenase (NADP+) [EC:1.2.1.9]	1149.35	1352.35	222.939	135.885	604.671	12.8564	38.0292	14.7902	21.5496
TRINITY_DN97373_c0_g2	tat; tyrosine aminotransferase [EC:2.6.1.5]	0.230266	0.240045	0.175579	0.522234	1.26342	0.684855	7.83318	5.22894	8.70211
TRINITY_DN97387_c3_g4	aroC; chorismate synthase [EC:4.2.3.5]	0.383195	0.431583	1.35885	3.59276	6.11081	1.5429	4.38891	3.1115	8.12216
TRINITY_DN97400_c5_g3	alt; alanine transaminase [EC:2.6.1.2]	34.1486	48.0669	10.1032	4.40183	14.1759	1.6639	1.63844	0.528204	0.6229
