# Supplementary material for: Amino acids profiling and transcriptomic data integration demonstrates the dynamic regulation of amino acids synthesis in the leaves of Cyclocarya paliurus
Source: PeerJ. 2022 Jul 5;10:e13689. doi: 10.7717/peerj.13689 (PMC9266588; doi:10.7717/peerj.13689)
Supplement: Supplemental Information 13 [file peerj-10-13689-s013.xls]

## Sheet: 0.8 PCC(Gene vs log2Meta)
Table S7 Correlation between genes and metabolites (P-value≤0.05, |PCC|≥0.8).
GENE	META	P	PCC
scs	Alanine	0.00831039	-0.808734
pgm	Alanine	0.00131734	-0.88965
tal	Alanine	0.00445734	-0.841464
tkt	Alanine	0.00221623	-0.871284
pgd	Alanine	0.00632287	-0.823898
rpiA	Histidine	0.00706303	-0.817917
rpiA	Tryptophan	0.00500581	-0.835848
rpiA	Tyrosine	0.00249096	-0.866737
fba	Proline	0.00530182	-0.83299
fba	Citrulline	0.00444975	-0.841545
fba	Serine	0.000247675	-0.932381
fba	Phenylalanine	0.000393128	-0.922624
fba	Threonine	0.00141287	-0.887346
fba	Histidine	0.00495931	-0.836307
fba	Tryptophan	0.000984084	-0.898739
fba	Homoserine	0.00377226	-0.849189
fba	Asparagine	0.00111331	-0.894993
fba	Tyrosine	0.000361894	-0.924472
fba	Methionine	0.00668026	-0.820954
fba	Glutamine	0.00191391	-0.876762
fba	Homocystine	2.04221e-05	-0.96718
rpiA	Proline	0.00351059	-0.852393
rpiA	Citrulline	0.00126023	-0.891084
rpiA	Serine	0.00118524	-0.893037
rpiA	Phenylalanine	0.000515249	-0.916254
rpiA	Threonine	0.00201374	-0.874891
rpiA	Histidine	0.000864594	-0.902522
rpiA	Tryptophan	0.000334283	-0.926202
rpiA	Homoserine	0.00460021	-0.839958
rpiA	Asparagine	2.7817e-05	-0.964119
rpiA	Tyrosine	0.00290147	-0.860549
rpiA	Glutamine	0.000126778	-0.944346
rpiA	Homocystine	4.76468e-05	-0.958084
glnA	Histidine	0.00900067	-0.80405
glnA	Tryptophan	0.0057942	-0.82847
eno	Citrulline	0.00520469	0.833916
eno	Serine	0.00868188	0.806182
eno	Phenylalanine	0.00463919	0.839552
eno	Threonine	0.00608707	0.825904
eno	Histidine	0.00281825	0.861752
eno	Tryptophan	0.000400677	0.922192
eno	Asparagine	0.00210605	0.873217
eno	Tyrosine	0.00182293	0.878528
eno	Glutamine	0.006653	0.821174
eno	Homocystine	0.000709404	0.908025
gapdh	Alanine	0.002814	-0.861814
pgk	Citrulline	0.00527399	-0.833254
pgk	Phenylalanine	0.00590723	-0.827469
pgk	Histidine	0.00174518	-0.880085
pgk	Tryptophan	0.00271965	-0.86321
pgk	Asparagine	0.00934437	-0.801808
pgk	Methionine	0.00765937	-0.8134
pgk	Glutamine	0.00375768	-0.849363
glyA	Citrulline	0.00420593	-0.844197
glyA	Serine	0.00950108	-0.800804
glyA	Phenylalanine	0.0048938	-0.836959
glyA	Histidine	0.00692797	-0.818975
glyA	Arginine	0.00054757	-0.914748
glyA	Tyrosine	0.00463419	-0.839604
glyA	Methionine	0.00217238	-0.872045
got	Citrulline	0.00519535	0.834005
got	Serine	0.00685637	0.819542
got	Phenylalanine	0.00267496	0.863883
got	Threonine	0.00405719	0.845868
got	Histidine	0.0031447	0.857163
got	Tryptophan	0.00024535	0.932566
got	Asparagine	0.00166253	0.881795
got	Tyrosine	0.00135321	0.888772
got	Glutamine	0.00588852	0.827634
got	Homocystine	0.000381301	0.923311
pfkA	Threonine	0.0089888	0.804129
pfkA	Tryptophan	0.00226879	0.870385
pfkA	Homocystine	0.00543208	0.831768
ltaE	Proline	0.0020063	-0.875028
ltaE	Citrulline	0.00535718	-0.832468
ltaE	Serine	0.000290406	-0.92917
ltaE	Phenylalanine	0.000414813	-0.9214
ltaE	Threonine	0.00100369	-0.89815
ltaE	Histidine	0.00867212	-0.806248
ltaE	Tryptophan	0.00231251	-0.869648
ltaE	Homoserine	0.00426614	-0.843533
ltaE	Asparagine	0.00613639	-0.82548
ltaE	Tyrosine	0.000165694	-0.939845
ltaE	Methionine	0.00363679	-0.850828
ltaE	Glutamine	0.00458786	-0.840086
ltaE	Homocystine	0.000812436	-0.904289
thrA	Proline	0.0067476	0.820411
thrA	Serine	0.00572589	0.829081
thrA	Threonine	0.00619731	0.82496
thrA	Homoserine	0.000322562	0.926967
tat	Proline	0.00423862	-0.843836
tat	Citrulline	0.00431716	-0.842975
tat	Serine	0.000325514	-0.926772
tat	Phenylalanine	0.00043927	-0.920073
tat	Threonine	0.00150696	-0.88518
tat	Histidine	0.00260487	-0.864954
tat	Tryptophan	0.000883849	-0.901889
tat	Homoserine	0.00154198	-0.884397
tat	Asparagine	0.000210702	-0.93549
tat	Tyrosine	0.00605916	-0.826145
tat	Methionine	0.00668048	-0.820952
tat	Glutamine	8.97099e-05	-0.949658
tat	Homocystine	5.61631e-05	-0.956042
acly	Phenylalanine	0.00502066	0.835702
acly	Threonine	0.00221689	0.871272
acly	Tryptophan	0.000747552	0.9066
acly	Asparagine	0.00902419	0.803895
acly	Tyrosine	0.00657116	0.821841
acly	Glutamine	0.00939521	0.801481
acly	Homocystine	0.00107819	0.89598
