# Supplementary material for: Amino acids profiling and transcriptomic data integration demonstrates the dynamic regulation of amino acids synthesis in the leaves of Cyclocarya paliurus
Source: PeerJ. 2022 Jul 5;10:e13689. doi: 10.7717/peerj.13689 (PMC9266588; doi:10.7717/peerj.13689)
Supplement: Supplemental Information 14 [file peerj-10-13689-s014.xlsx]

## Sheet: Sheet1
Table S8 Raw data for qRT-PCR
Gene name	Repeat 1-1	Repeat 1-2	Repeat 1-3	Repeat 2-1	Repeat 2-2	Repeat 2-3	Repeat 3-1	Repeat 3-2	Repeat 3-3
TRINITY_DN97785_c1_g4	22.47	23.17	25.09	28.18	32.14	25.13	20.66	25.27	21.64
TRINITY_DN82092_c1_g3	32.11	32.99	33.24	34.8	34.77	32.16	23.96	22.31	21.64
TRINITY_DN87922_c2_g2	24.52	23.52	25.46	25.72	26.13	26.06	21.11	23.24	22.15
TRINITY_DN93648_c0_g1	28.26	30.43	30.91	33.18	34.36	30.34	26.09	30.16	26.52
TRINITY_DN96899_c2_g2	24.75	27.34	28.28	33.94	34.19	27.8	22.17	25.49	23.2
TRINITY_DN87678_c2_g2	28.25	30.22	30.42	33.62	32.58	29.24	19.28	21.77	20.21
TRINITY_DN91569_c1_g4	30.33	32.06	32.08	34.41	36.08	31.74	26.46	21.81	22.71
TRINITY_DN93212_c0_g1	26.2	26.4	27.92	31.62	32.83	30.86	23.23	27.33	24.64
TRINITY_DN93919_c0_g1	32.23	26.4	33.01	32.59	31.55	29.25	23.23	25.69	22.95
TRINITY_DN83323_c1_g1	29.6	28.83	36.15	34.31	33.24	35.58	31.51	26.51	33.91
TRINITY_DN88919_c2_g3	28.37	28.07	27.4	29.62	30.58	28.29	19.66	23.47	22.7
TRINITY_DN81021_c4_g6	31.78	30.59	32.93	34.45	35.44	35.89	29.44	31.15	30.68
TRINITY_DN86203_c1_g1	33.58	34.45	35.26	36.33	37.55	31.46	24.69	24.26	26.14
TRINITY_DN76877_c1_g1	32.62	34.28	28.42	36.22	35.69	33.5	29.03	30.59	26.31
TRINITY_DN81124_c1_g3	31.54	33.32	32.11	36.69	38.54	35.23	34.99	29.86	33.35
TRINITY_DN97373_c0_g2	34.11	36.15	36.47	36.64	39.12	34.84	25.83	28.07	25.78
actin	34.11	36.15	36.47	36.64	39.12	34.84	25.83	28.07	25.78
