# Supplementary material for: Amino acids profiling and transcriptomic data integration demonstrates the dynamic regulation of amino acids synthesis in the leaves of Cyclocarya paliurus
Source: PeerJ. 2022 Jul 5;10:e13689. doi: 10.7717/peerj.13689 (PMC9266588; doi:10.7717/peerj.13689)
Supplement: Supplemental Information 15 [file peerj-10-13689-s015.xls]

## Sheet: bZIPs
Table S9 Differentially expressed bZIP genes screened in PlantTFDB database
gene	S1-1	S1-2	S1-3	S2-1	S2-2	S2-3	S3-1	S3-2	S3-3
TRINITY_DN82089_c0_g2	3.01387	2.92646	3.70318	2.26461	3.50776	2.97822	1.33746	0.434647	0.283047
TRINITY_DN82089_c0_g3	11.9225	30.5794	55.2682	7.94151	10.8774	15.5255	16.0555	4.91049	0.846663
TRINITY_DN82315_c0_g1	6.43071	3.641	3.41935	4.68126	6.14685	1.0589	1.915	1.3619	1.62631
TRINITY_DN82576_c0_g1	9.01315	6.14205	1.11806	0.633817	9.34274	0.209681	1.78143	1.04647	0.768906
TRINITY_DN83709_c1_g4	17.3447	14.1328	38.5823	110.386	71.1219	95.9544	80.7865	155.873	19.629
TRINITY_DN84176_c0_g2	9.52299	6.51177	12.8915	2.63934	2.56639	2.81342	1.20942	2.96113	0.581611
TRINITY_DN84176_c0_g6	3.49999	2.27903	6.25362	1.28637	0.709605	0.947507	0.350544	1.96538	0.286768
TRINITY_DN84256_c3_g3	5.67699	2.89502	3.03077	1.84813	2.75726	0.214197	4.79233	1.88477	2.42606
TRINITY_DN84846_c2_g1	6.20478	6.09704	7.09092	5.73937	5.60726	3.50398	11.4072	5.61796	2.50061
TRINITY_DN85627_c0_g1	3.54806	1.66074	4.41352	0.918205	1.04328	2.07416	8.03687	23.8405	3.68351
TRINITY_DN85627_c0_g5	22.5299	17.4094	9.60451	5.68686	14.8105	5.31932	10.2482	7.11285	11.5605
TRINITY_DN85807_c1_g2	12.1523	11.644	28.244	28.3282	13.8093	21.1983	19.0456	33.2949	9.2524
TRINITY_DN85807_c1_g4	1.22176	1.70909	3.81247	6.48843	3.29499	5.44545	16.6824	29.4576	17.3607
TRINITY_DN85936_c1_g2	4.62272	0.882043	3.94181	3.32183	4.02006	0.921102	6.77841	7.0693	9.52068
TRINITY_DN86159_c0_g1	10.6837	7.74669	6.17213	5.14154	4.88064	4.72704	4.60432	4.02965	0.880936
TRINITY_DN86662_c2_g3	19.7688	16.0189	21.7271	31.2766	21.0669	14.4023	14.1937	11.2704	107.445
TRINITY_DN87253_c0_g2	13.4655	12.1272	33.3066	23.4685	10.5391	12.8194	7.07792	7.88248	1.59699
TRINITY_DN87536_c0_g1	26.9636	23.3033	34.0396	29.4047	23.3651	37.3223	106.842	40.1131	8.09874
TRINITY_DN88143_c2_g4	1.2806	0.866649	1.02478	1.48952	1.84228	1.48819	2.63314	1.70634	0.433081
TRINITY_DN88622_c1_g1	12.4587	11.0591	21.7791	22.3581	21.1496	15.8471	18.7007	13.4714	5.0726
TRINITY_DN88663_c2_g2	7.30313	5.51711	8.2809	1.29318	1.39715	0.517667	2.27909	0.382552	0.213939
TRINITY_DN88746_c0_g4	6.16212	0.82689	0.900742	0.930692	4.8072	0.933522	0.615865	2.07919	6.2513
TRINITY_DN88935_c0_g5	7.86866	5.89901	1.14074	1.10367	11.1968	1.12258	5.85197	7.27395	9.4104
TRINITY_DN88959_c0_g7	17.9911	9.64064	8.62793	12.3133	11.5066	3.25641	30.3005	37.7246	11.421
TRINITY_DN89043_c4_g4	2.8335	2.94243	4.84563	5.4629	5.23962	6.31768	8.02187	9.41884	2.82236
TRINITY_DN91261_c1_g3	3.41253	0.807015	8.29146	43.3112	17.813	9.17768	13.6684	0.278471	2.15161
TRINITY_DN91306_c1_g4	4.18576	3.17431	9.57572	5.2333	2.61208	2.82135	7.88342	5.31351	1.10132
TRINITY_DN91423_c1_g1	1.52232	1.60184	4.37867	1.20942	2.0333	1.75351	3.83412	5.11771	4.41883
TRINITY_DN91423_c1_g3	2.37696	1.93817	2.26765	3.27109	14.7836	1.41793	4.15763	4.06061	8.24823
TRINITY_DN91543_c1_g1	3.05038	2.0663	2.32771	0.264446	3.33974	0.546574	2.75057	1.97137	2.55747
TRINITY_DN91543_c1_g2	6.29082	4.8755	12.1674	12.5897	8.83791	4.25632	15.7607	14.7602	5.48426
TRINITY_DN91599_c0_g1	1.94232	3.32262	3.81	7.0495	2.57793	2.39732	11.8426	39.4253	2.59924
TRINITY_DN91599_c3_g1	5.44054	5.80248	3.64965	1.99343	7.57592	1.54446	7.49041	4.25746	5.10731
TRINITY_DN91599_c3_g2	7.20027	4.89444	7.20824	9.0851	12.7528	7.22259	20.9291	19.2467	10.1493
TRINITY_DN92071_c0_g1	0.737172	0.15802	0.332221	0.228562	1.57962	0.857818	8.66643	13.2098	1.77798
TRINITY_DN92071_c0_g3	9.9065	9.63714	15.4916	16.0297	11.1546	8.71039	10.9602	34.9966	9.08443
TRINITY_DN92071_c0_g4	8.83324	5.79682	19.8583	11.4526	12.1669	10.8718	16.1311	17.5421	2.93934
TRINITY_DN92071_c0_g5	0.684479	0.131248	0.503806	0.589857	1.35133	2.35905	2.4624	3.37466	2.39911
TRINITY_DN92071_c0_g7	14.1501	13.6608	1.60762	9.21376	18.4855	2.57528	21.4365	9.46038	19.6401
TRINITY_DN92184_c0_g1	2.86273	2.27477	1.19699	1.34941	1.51733	0.29693	4.54645	3.77793	0.432624
TRINITY_DN92184_c0_g2	1.74989	0.892496	3.26177	4.5113	3.28572	4.86911	2.34171	6.84973	0.689092
TRINITY_DN92184_c0_g3	5.25015	2.99222	4.34929	5.85333	3.62085	2.48084	5.97015	11.0351	1.69063
TRINITY_DN92184_c0_g4	2.96934	2.13521	1.08186	0.89108	2.77861	1.88068	6.69967	2.32701	0.967118
TRINITY_DN92184_c0_g5	8.01739	5.7746	16.8261	15.933	11.1653	2.99428	13.0847	16.4405	8.16476
TRINITY_DN92184_c0_g7	2.76952	1.78796	3.58166	1.76744	5.08877	6.27689	4.47388	4.27229	4.08781
TRINITY_DN92484_c1_g1	8.82199	6.97449	9.68258	10.8169	9.65805	7.97149	6.35161	14.7973	7.26065
TRINITY_DN92484_c1_g4	7.95875	10.6295	10.0717	6.42087	13.212	1.8235	15.0383	7.80236	1.84534
TRINITY_DN92634_c1_g1	9.52429	6.20661	7.34785	13.5188	22.4879	7.41928	19.1419	9.65017	7.37254
TRINITY_DN92682_c1_g1	3.90708	4.79621	5.36145	7.76291	4.69168	2.13453	3.96008	3.68664	1.20978
TRINITY_DN92682_c1_g2	6.10195	6.91205	10.7597	13.0895	5.71715	3.69208	7.39262	12.9311	5.41668
TRINITY_DN92682_c1_g4	6.21596	7.63718	6.11392	8.97484	11.2969	4.00915	6.0738	4.03606	1.30177
TRINITY_DN92682_c1_g5	3.1686	5.11796	2.58231	5.36085	5.08329	2.84571	4.81455	5.90415	2.51237
TRINITY_DN93563_c1_g1	12.9835	12.72	31.9706	31.9121	15.2614	22.3703	23.8996	24.7112	3.766
TRINITY_DN95122_c2_g3	7.6062	8.63557	2.47937	4.17654	13.1047	2.51278	11.2687	11.888	7.91066
TRINITY_DN95122_c2_g4	0.676059	0.780539	0.639418	9.15841	3.23971	2.84456	4.42836	7.34187	0.629299
TRINITY_DN96562_c2_g3	99.7524	59.1538	50.2959	48.0915	192.185	21.1651	52.3108	15.9028	37.2731
TRINITY_DN96562_c2_g6	108.245	44.7794	254.294	297.316	181.213	219.877	255.164	177.57	84.905
TRINITY_DN96834_c0_g2	8.18054	6.4968	6.7311	1.6569	4.90446	2.03068	12.5993	11.3598	16.5871
TRINITY_DN96834_c0_g3	25.8671	19.4261	42.7959	34.591	19.9549	19.5229	40.1105	78.7877	15.1299
TRINITY_DN97581_c3_g5	2.79595	1.74308	7.46	29.9068	14.9365	9.23207	4.81252	0.128402	0.21364
